# Supplementary material for: Genome Scans Reveal Homogenization and Local Adaptations in Populations of the Soybean Cyst Nematode
Source: Front Plant Sci. 2018 Jul 17;9:987. doi: 10.3389/fpls.2018.00987 (PMC6056837; doi:10.3389/fpls.2018.00987)
Supplement: Supplementary file 1 [file Data_Sheet_1.XLSX]

## Sheet: Suppl. table 1
Supplementary table 1. FST value for all pairs of populations
Sample	IA6	IA8	IA9	IL1	IL2	IL3	IL4	IL5	IL7	IN1	KS1	KS2	MD1	MI1	MN1	MN2	MN3	MN4	MN5	MN6	MO1	MO4	MO5	ND1	ND3	ND4	ND5	ND6	NE1	OH1	OH2	ON10	ON11	ON13	ON14	ON15	ON16	ON19	ON1	ON20	ON21	ON24	ON25	ON26	ON27	ON30	ON32	ON34	ON36
IA1	0.13444601	0.10646497	0.12766832	0.09212498	0.1104222	0.11832551	0.11946422	0.1412775	0.1767163	0.12118382	0.13658584	0.12506082	0.14155574	0.13376137	0.11939556	0.10868251	0.12099737	0.20310558	0.22155101	0.09072545	0.12033061	0.09585392	0.11123143	0.10202222	0.20850264	0.15105194	0.1917556	0.33054725	0.13354306	0.19381354	0.10022595	0.18706097	0.10541998	0.17427024	0.19302093	0.1061514	0.17310891	0.18118222	0.10148699	0.1266753	0.12351813	0.12016702	0.22220515	0.10481967	0.10760022	0.12603373	0.10855899	0.19420582	0.17573069
IA6		0.08251192	0.10869518	0.06837387	0.1000739	0.08008806	0.09655991	0.12658815	0.1450973	0.0913655	0.10198163	0.09116942	0.13650249	0.115188	0.10908038	0.0949743	0.12433914	0.19866915	0.24643697	0.09714597	0.09273439	0.0853006	0.10012756	0.06380137	0.14710443	0.1126131	0.17582831	0.33715249	0.09885917	0.14066538	0.07494859	0.15035828	0.07842673	0.13722098	0.17404334	0.0893185	0.13084257	0.14145913	0.08874663	0.11424524	0.13398452	0.10750641	0.18991852	0.09357084	0.07425974	0.09318543	0.08815249	0.168879	0.17668476
IA8			0.08627635	0.05707039	0.06510501	0.05747719	0.06659558	0.09492581	0.15470554	0.10056524	0.07683314	0.08196725	0.11449504	0.09881059	0.11471419	0.08546883	0.11180644	0.19279605	0.23049164	0.07260431	0.08769047	0.06520281	0.08720606	0.05475097	0.16395799	0.10620217	0.16993255	0.3236078	0.07447723	0.1503823	0.07476937	0.13646705	0.07172693	0.13679272	0.12886114	0.05823565	0.12738858	0.10657579	0.06043493	0.11008835	0.09490239	0.08709463	0.1675354	0.07686546	0.06369809	0.08999858	0.07040069	0.14136014	0.14354845
IA9				0.06697779	0.1046864	0.08681557	0.10199774	0.12109608	0.13684651	0.057153	0.11919972	0.0997427	0.06908933	0.02266782	0.12492375	0.0755119	0.08636867	0.13777413	0.17042839	0.07213209	0.0987687	0.08451353	0.09642628	0.07183406	0.1863512	0.12516787	0.08424529	0.24990338	0.08447921	0.15125759	0.08845928	0.13717412	0.08146442	0.14952659	0.16271771	0.08055012	0.14216246	0.14787846	0.08942763	0.1115483	0.11168589	0.05681577	0.16524662	0.08911512	0.08547976	0.11494283	0.07693857	0.16259488	0.13558198
IL1					0.06243414	0.06448675	0.05402389	0.0828975	0.12313975	0.06762605	0.07901425	0.05302433	0.1031218	0.06440598	0.08985654	0.06941686	0.09352151	0.17191957	0.21473436	0.06207989	0.05526307	0.05430318	0.05263414	0.04213532	0.13392198	0.07564596	0.15222518	0.30340578	0.05825883	0.12987287	0.06266609	0.10384467	0.04783598	0.10825428	0.13250431	0.04487641	0.09389027	0.11789559	0.04628646	0.085054	0.07109469	0.07575205	0.14873042	0.05090546	0.04741422	0.07477237	0.05301919	0.14062736	0.10585843
IL2						0.07785601	0.08691845	0.10950301	0.14088062	0.10818359	0.0975284	0.0904591	0.12914532	0.10492984	0.10706252	0.09887839	0.11678717	0.19484002	0.23724718	0.08032863	0.08725852	0.0651641	0.08197727	0.05885692	0.18100715	0.12544554	0.18353651	0.3404739	0.09991789	0.1454932	0.07107209	0.15956782	0.07637493	0.16024557	0.14056864	0.07157195	0.15000346	0.15103902	0.06529485	0.11587837	0.09454335	0.09831796	0.17424835	0.08077908	0.07721052	0.09686787	0.08730385	0.18380379	0.13478193
IL3							0.06803974	0.09423893	0.12448605	0.0939121	0.09314662	0.09298278	0.10541917	0.09207344	0.10670122	0.08398033	0.10762451	0.1775523	0.21539688	0.07663505	0.08012742	0.07186479	0.07833752	0.06419094	0.15948052	0.10839962	0.14958572	0.31293213	0.09057908	0.14643598	0.07460019	0.14126493	0.08200111	0.14101395	0.15656955	0.06711254	0.11833766	0.13170023	0.07681971	0.11259503	0.10667395	0.09554391	0.14153837	0.07692095	0.06424843	0.10168069	0.07710841	0.15555338	0.14039746
IL4								0.09459326	0.14150971	0.10071028	0.09586084	0.09054611	0.12180535	0.10347201	0.11354763	0.10015932	0.12035637	0.19984711	0.24788709	0.08360063	0.07310065	0.07491777	0.08614815	0.06509049	0.13376449	0.08843775	0.17934817	0.34189574	0.08657389	0.16836539	0.08453174	0.13646309	0.07649324	0.13679737	0.15548373	0.05984454	0.10821485	0.13247328	0.06715354	0.1134857	0.10317373	0.10122751	0.16873964	0.06513082	0.06840682	0.09848119	0.07475119	0.17022349	0.12390813
IL5									0.18160269	0.11480797	0.13288633	0.11031919	0.14689638	0.12241125	0.15278293	0.12531127	0.14514394	0.22395556	0.26787493	0.10864826	0.1062502	0.08925928	0.09501507	0.07776064	0.19907893	0.13690687	0.21417054	0.37407034	0.11079827	0.18440652	0.127927	0.13851719	0.10131857	0.15829097	0.14186937	0.07373092	0.09927174	0.15431212	0.08303186	0.13039572	0.11245187	0.11833581	0.18515527	0.09689925	0.06774244	0.11264557	0.08349273	0.19826207	0.1692565
IL7										0.11815857	0.18189838	0.16550823	0.13255304	0.13540015	0.18301459	0.11574568	0.12476382	0.15157008	0.19368031	0.11532812	0.14236442	0.14812035	0.13895335	0.12200715	0.21788959	0.16319107	0.14405348	0.29395036	0.16435415	0.22327237	0.1261946	0.20999952	0.1254212	0.18222701	0.230558	0.14387122	0.19264079	0.19840596	0.14358287	0.14345987	0.18818828	0.12730261	0.21458593	0.13012088	0.12509172	0.15100498	0.13263799	0.24335485	0.22856075
IN1											0.12231964	0.09825838	0.07189693	0.05818211	0.12991456	0.08649342	0.08021233	0.12509997	0.15583794	0.08331196	0.09007364	0.08307744	0.09019183	0.07786251	0.17016137	0.11984521	0.09503382	0.25142515	0.09669841	0.16856572	0.10222699	0.15048537	0.07743119	0.13114024	0.16643639	0.08970373	0.12567585	0.14587559	0.09507335	0.10011244	0.11734116	0.06457695	0.16215703	0.09019094	0.08088162	0.11171836	0.08582433	0.17273076	0.15328325
KS1												0.09746995	0.17023387	0.12366761	0.1296896	0.12239776	0.14585987	0.23795851	0.28491838	0.10027061	0.08794491	0.09307467	0.11434392	0.06853529	0.13506122	0.09382684	0.21332202	0.38483543	0.10396018	0.1612679	0.09662416	0.14543695	0.09448627	0.15527982	0.16535475	0.09226454	0.14845686	0.15256082	0.0922127	0.1425359	0.13002417	0.12675742	0.20038253	0.10197624	0.09475371	0.13156929	0.11016723	0.19285368	0.18116936
KS2													0.13502562	0.10001944	0.13335516	0.10140074	0.11694054	0.20585827	0.24848748	0.08122207	0.09519138	0.06502004	0.09424853	0.07519632	0.15144737	0.10537591	0.1839364	0.34414405	0.08001092	0.15419538	0.08966651	0.1330953	0.08162727	0.15119615	0.17800075	0.07737865	0.12081779	0.17115079	0.06282608	0.11438066	0.09432963	0.10870634	0.1830835	0.09290533	0.08054337	0.09806227	0.07735955	0.16184373	0.15764972
MD1														0.08174573	0.16165942	0.10049611	0.08015215	0.10538117	0.11337574	0.09497379	0.12569402	0.11327037	0.12945341	0.1027595	0.21704932	0.16792906	0.06839813	0.20639149	0.13126946	0.19880545	0.11765483	0.18272988	0.10596057	0.16933934	0.19409805	0.1125378	0.17139046	0.17834077	0.11974363	0.13452306	0.13718207	0.07208503	0.18222691	0.12343752	0.11819296	0.1376124	0.09642585	0.20659553	0.1729608
MI1															0.14051924	0.0793111	0.09084173	0.14339594	0.17789735	0.07859691	0.10006915	0.0897572	0.10001196	0.07643781	0.18951736	0.13187468	0.09579744	0.25709465	0.09321034	0.16938417	0.09842317	0.15153852	0.08201217	0.1384515	0.16552928	0.08639827	0.1413997	0.15814034	0.09753859	0.1051114	0.11363578	0.06840865	0.15919761	0.09112959	0.0876232	0.12604559	0.08431675	0.17019005	0.13832966
MN1																0.11559226	0.1447083	0.23668288	0.2846556	0.10958988	0.10872895	0.11144382	0.10927897	0.0840513	0.19088801	0.12591291	0.20975184	0.38387505	0.11952901	0.13492037	0.10454345	0.15316014	0.10136267	0.15591561	0.19945993	0.09285792	0.15853379	0.16977942	0.09573727	0.16340018	0.13618879	0.13372733	0.20646542	0.09505404	0.0978641	0.1054197	0.112095	0.21263983	0.16240762
MN2																	0.07213979	0.13627611	0.16224682	0.05797754	0.10577786	0.08296323	0.09414718	0.08410483	0.19010692	0.13033767	0.12550312	0.25186182	0.10450749	0.15869341	0.08114365	0.15302602	0.08805389	0.14691742	0.15195753	0.08572889	0.14826379	0.15173483	0.0950339	0.10714439	0.12516029	0.08728062	0.1854729	0.09222125	0.08073044	0.1165481	0.0896372	0.15513184	0.15482204
MN3																		0.07324832	0.08797801	0.073353	0.12000244	0.10065758	0.11393915	0.09332267	0.21564504	0.15398061	0.10008339	0.17943777	0.12025825	0.17523477	0.10406198	0.18466294	0.09849986	0.15938604	0.1918965	0.10726082	0.16039232	0.17775802	0.10973191	0.10483521	0.14311916	0.08741308	0.18019506	0.11456255	0.10520667	0.13400016	0.0994112	0.19013707	0.18562873
MN4																			0.06528723	0.13268531	0.19420925	0.1768541	0.19333573	0.17075945	0.29843427	0.23810799	0.08642613	0.14871565	0.20327959	0.26275216	0.18433213	0.27882428	0.16170623	0.23114632	0.26971373	0.19300284	0.24425937	0.25314765	0.19326414	0.16818985	0.22109322	0.13306615	0.25179809	0.19011417	0.18525236	0.20550459	0.16663786	0.275051	0.26289965
MN5																				0.16466223	0.24652615	0.21301285	0.23356302	0.21183509	0.35816448	0.29434369	0.10603404	0.13224495	0.2513327	0.31408738	0.21844751	0.32635126	0.20663247	0.27742629	0.3157482	0.2352369	0.29333695	0.29643137	0.23985556	0.20022698	0.26927363	0.15885088	0.29539078	0.23459515	0.22514828	0.25784985	0.20563308	0.3203377	0.31684682
MN6																					0.09984652	0.06691895	0.08694486	0.07162517	0.16997772	0.10864486	0.13512822	0.26651709	0.06806012	0.1522573	0.08065802	0.1433632	0.08053803	0.14616656	0.14588148	0.06525793	0.1344104	0.14136904	0.07380553	0.09125551	0.09902451	0.0852205	0.17145736	0.07449528	0.06553474	0.09973678	0.07646914	0.16123922	0.13713374
MO1																						0.07209954	0.0793732	0.05792306	0.16038104	0.09696648	0.17743869	0.34288144	0.08873881	0.15120776	0.10288931	0.13480076	0.07221304	0.13192877	0.17314915	0.07474661	0.11914062	0.15848967	0.08085819	0.11247439	0.1128041	0.10608672	0.14921301	0.07818047	0.07783918	0.09605806	0.08647835	0.15767289	0.1559833
MO4																							0.07849766	0.05587635	0.15724451	0.08687452	0.15751808	0.32128265	0.07984052	0.14171703	0.07226582	0.13035545	0.06923271	0.14283724	0.148304	0.05423778	0.13490235	0.14093162	0.04994646	0.09074446	0.08752214	0.08438715	0.15496735	0.07125176	0.0560163	0.08559316	0.06966225	0.1325624	0.14008799
MO5																								0.07057209	0.18854136	0.12511256	0.18297941	0.3346736	0.08989505	0.13754017	0.09500732	0.13254868	0.06925495	0.14298124	0.1634157	0.07402164	0.09781825	0.14958255	0.07149819	0.10441245	0.09231303	0.10211964	0.15194759	0.07156572	0.06649838	0.09752685	0.08227207	0.16930488	0.1208915
ND1																									0.13970547	0.08957542	0.1515155	0.30714682	0.06475466	0.12430921	0.06419191	0.10970958	0.05192629	0.10822123	0.11364649	0.05112478	0.10811918	0.10484874	0.05710213	0.0807723	0.08567003	0.07057171	0.13959735	0.0632843	0.04632345	0.08263589	0.0530416	0.13695446	0.11699627
ND3																										0.05991331	0.26372251	0.45531604	0.18919434	0.25760178	0.14256876	0.17872776	0.16873556	0.21905385	0.23933578	0.16062182	0.24354231	0.22676966	0.16297024	0.21571643	0.21689245	0.19447242	0.27621594	0.16694992	0.14340009	0.20417803	0.17857507	0.28842878	0.26860852
ND4																											0.21092411	0.38548526	0.12216038	0.17960697	0.09050741	0.12928656	0.10781856	0.15673283	0.1825303	0.09411711	0.17474897	0.17266398	0.09485124	0.15171619	0.14444076	0.13510708	0.20079806	0.09770349	0.08422267	0.13416531	0.11835951	0.21341444	0.19794386
ND5																												0.18030689	0.18260815	0.23258437	0.16120523	0.23233516	0.14355848	0.21012522	0.25030112	0.16845266	0.22036133	0.22344321	0.17532577	0.17098055	0.19683813	0.09654604	0.22888534	0.16685432	0.16618493	0.19189925	0.14265089	0.24895164	0.23667023
ND6																													0.3608108	0.40505542	0.3120592	0.4232875	0.28805073	0.36409403	0.41659901	0.33194079	0.38879911	0.39960728	0.33647127	0.30274401	0.37199936	0.24352597	0.39265388	0.32357803	0.32409399	0.3574563	0.29130542	0.41996454	0.42028235
NE1																														0.16691994	0.10061757	0.13575867	0.07344603	0.14135831	0.17552267	0.05242418	0.13515157	0.14749481	0.06651998	0.10837172	0.09390507	0.10433422	0.16192925	0.0714901	0.06539569	0.09419842	0.07314997	0.15046154	0.14718011
OH1																															0.14313584	0.20549144	0.13202252	0.20480205	0.24347594	0.13639965	0.16277869	0.20552345	0.13579786	0.18353891	0.16905665	0.17346484	0.24300306	0.13854445	0.14494212	0.15819729	0.14102734	0.2422233	0.24391783
OH2																																0.1475063	0.08162077	0.14277723	0.15036851	0.073092	0.16297333	0.13906841	0.06636119	0.11408084	0.12323683	0.09244883	0.19341464	0.07806999	0.073483	0.09945674	0.08440914	0.16498873	0.14954978
ON10																																	0.12457022	0.19217943	0.1946794	0.10044169	0.16061225	0.21889725	0.11112346	0.18005261	0.15098799	0.14355645	0.20944303	0.11291489	0.10496293	0.1519585	0.11442296	0.22121583	0.21380364
ON11																																		0.07627633	0.14611698	0.0435345	0.10026841	0.138547	0.04931392	0.07956663	0.09237651	0.06632588	0.10875065	0.04423722	0.05270718	0.08837962	0.05336331	0.12244647	0.12933043
ON13																																			0.18853445	0.10220146	0.1691522	0.19023003	0.11916628	0.12903779	0.17761323	0.13552283	0.17083854	0.10968621	0.10351002	0.15610888	0.11837038	0.17459038	0.21728642
ON14																																				0.12600785	0.20022812	0.17910822	0.14317141	0.17593098	0.18654609	0.14557416	0.24960956	0.14222821	0.11899437	0.1862902	0.13418004	0.24415487	0.23112479
ON15																																					0.10466506	0.11396515	0.02755973	0.08029549	0.08046671	0.08267939	0.13375942	0.03083469	0.02760481	0.071046	0.04573228	0.12545993	0.11530042
ON16																																						0.18089983	0.10284555	0.15259592	0.11986491	0.12645354	0.18798146	0.10192972	0.1045203	0.13412226	0.09501736	0.22304856	0.19419334
ON19																																							0.13193595	0.1647673	0.14746209	0.14843927	0.24193991	0.12665144	0.1071728	0.13550595	0.1178879	0.22393341	0.22386007
ON1																																								0.08852445	0.06721919	0.07826598	0.14938745	0.03998771	0.03983748	0.06477918	0.03853962	0.13788773	0.11521276
ON20																																									0.13126488	0.09940141	0.17741453	0.08794012	0.07384266	0.12609168	0.08233444	0.16377836	0.15952875
ON21																																										0.11648497	0.17379078	0.08327273	0.08769695	0.11951675	0.07066869	0.19395054	0.13567243
ON24																																											0.15246958	0.08668376	0.08282513	0.11440906	0.07003107	0.15443902	0.1417462
ON25																																												0.13142896	0.12343288	0.19562674	0.13903138	0.23756724	0.2464523
ON26																																													0.03801493	0.0846371	0.05960266	0.12541168	0.10656436
ON27																																														0.07919278	0.05341574	0.13119127	0.11945287
ON30																																															0.08527283	0.20282633	0.16922228
ON32																																																0.13003934	0.13665442
ON34																																																	0.23000077
ON36
ON38
ON3
ON40
ON41
ON46
ON4
ON50
ON51
ON5
ON6
ON8
SD1
SD2
[truncated: 14 more columns]

## Sheet: Suppl. table 2
Supplementary table 2. Genetic distance ratio to the “oldest population”*
Population	Genetic distance	Geographical distance
	FST/(1-FST)	(km)
IA1	0.14	690.687
IA6	0.10	715.084
IA8	0.10	560.919
IA9	0.11	808.884
IL1	0.06	385.919
IL2	0.10	296.659
IL3	0.09	618.357
IL4	0.08	618.357
IL5	0.12	505.987
IL7	0.17	433.441
IN1	0.10	273.16
KS1	0.10	656.559
KS2	0.11	838.859
MD1	0.14	1245.79
MI1	0.11	716.825
MN1	0.12	1095.28
MN2	0.12	974.048
MN3	0.14	995.418
MN4	0.24	995.418
MN5	0.33	899.534
MN6	0.11	974.048
MO4	0.08	653.879
MO5	0.09	346.973
ND1	0.06	1202.24
ND3	0.19	1227.51
ND4	0.11	1231.61
ND5	0.22	1215.41
ND6	0.52	1327.02
NE1	0.10	792.185
OH1	0.18	677.149
OH2	0.11	608.525
ON16	0.14	863
ON34	0.19	976
ON36	0.18	1092
ON41	0.31	1367
SD1	0.08	938.509
SD2	0.21	972.023
SD3	0.08	938.509
*Distances have been calcultared to the MO1 population.

## Sheet: Suppl. table 3
Supplementary table 3. Loci under selection identified by BayesScan
SNP	Associated covariables	GeneID	SNP location	S os N-S	Amino acid change	BLAST evalue	Best hit or nearest protein
TP5480	BIO18	g19239.t2	exon	S	Ala/Ala	7.00E-19	Transcription elongation factor S-II [Ancylostoma duodenale]
TP12586	BIO12	g19784.t1	exon	S	Pro/Pro	4.00E-04	Hypothetical protein CAEBREN_05646 [Caenorhabditis brenneri]
	BIO12	g10761.t1	exon	S	Pro/Pro	4.00E-04	Hypothetical protein CAEBREN_05646 [Caenorhabditis brenneri]
TP17903	BIO5;BIO18	g8247.t1	exon	N-S	Arg/Leu	1.30E-162	Uncharacterized protein [Globodera pallida]
	BIO5;BIO18	g14687.t1	exon	N-S	Arg/Leu	1.40E-181	Uncharacterized protein [Globodera pallida]
TP49348	LONG	g7925.t1	exon	S	Leu/Leu	2.00E-36	Eukaryotic translation initiation factor 3 subunit i [Ascaris suum]
TP65217	LONG	g3297.t1	exon	N-S	Arg/His	1.80E-159	CMGC/GSK protein kinase [Wuchereria bancrofti]
	LONG	g4308.t1	exon	N-S	Val/Met	1.60E-15	CMGC/GSK protein kinase [Loa loa]
TP68391	BIO18	g9662.t1	exon	N-S	Ala/Thr	2.00E-24	Maestro heat-like repeat-containing protein family member 1 [Toxocara canis]
	BIO18	g9640.t1	exon	N-S	Ala/Thr	2.00E-24	Maestro heat-like repeat-containing protein family member 1 [Hydra vulgaris]
TP68981	BIO12	g1926.t1	exon	S	Cys/Cys	6.00E-34	putative DNA polymerase [Exaiptasia pallida]
	BIO12	g11228.t1	exon	S	Cys/Cys	6.00E-34	putative DNA polymerase [Exaiptasia pallida]
	BIO12	g10907.t1	exon	S	Cys/Cys	1.90E-84	Putative DNA polymerase [Cyphomyrmex costatus]
TP171429	BIO12;BIO18	g6752.t1	exon	N-S	Leu/Arg	2.00E-21	Acetyl-coenzyme A synthetase, cytoplasmic [Toxocara canis]
TP173057	LAT	g18364.t1	exon	S	Ile/Ile	2.00E-11	Leucine Rich repeat-containing domain protein, partial [Necator americanus]
	LAT	g18329.t1	exon	S	Ile/Ile	5.50E-04	Zinc finger protein 8 [Ananas comosus]
TP181514	LAT;LONG;BIO1;BIO5;BIO18	g3633.t1	exon	S	Gly/Gly	1.60E-100	LET-19 [Caenorhabditis brenneri]
TP201915	BIO12	g12040.t1	exon	N-S	Ser/Asn	1.60E-37	BMA-MADF-9, isoform a [Brugia malayi]
	BIO12	g676.t1	exon	N-S	Ser/Asn	2.80E-37	BMA-MADF-9, isoform a [Brugia malayi]
TP222062	BIO5	g4369.t1	exon	S	Ile/Ile	1.00E-199	Spectrin beta chain [Trichinella pseudospiralis]
TP306833	BIO1	g18146.t1	exon	N-S	Lys/Asn	6.20E-16	PREDICTED: activating signal cointegrator 1 complex subunit 1-like [Diachasma alloeum]
TP319756	BIO18	g1897.t1	exon	N-S	Phe/Leu	2.50E-02	85/88 kDa calcium-independent phospholipase A2 [Toxocara canis]
TP333577	LAT;LONG;BIO12;BIO18	g16697.t1	exon	S	Leu/Leu	1.00E-110	Cadherin-4 [Caenorhabditis elegans]
TP333913	LAT;LONG;BIO1;BIO12	g14626.t1	exon	S	Gly/Gly	1.60E-17	EGL-17 [Brugia malayi]
TP349231	BIO18	g12861.t1	exon	S	Pro/Pro	7.30E-05	Zinc finger BED domain-containing protein 4 [Toxocara canis]
	BIO18	g7185.t1	exon	S	Pro/Pro	8.50E-05	Zinc finger BED domain-containing protein 4 [Toxocara canis]
TP237668	LAT;BIO12	g11663.t1	exon	S	Gly/Gly	1.00E-35	PREDICTED: retinoblastoma-binding protein 5 homolog isoform X1 [Populus euphratica]
	LAT;BIO12	g13101.t1	exon	S	Gly/Gly	1.50E-54	PREDICTED: protein RBL [Pyrus x bretschneideri]
TP364091	BIO1	g14644.t1	exon	S	Pro/Pro	2.60E-104	Dopamine receptor 3 [Caenorhabditis elegans]
	BIO1	g14654.t1	exon	N-S	Asp/Asn	7.80E-99	Dopamine receptor 3 [Caenorhabditis elegans]
	BIO1	g14639.t1	exon	S	Pro/Pro	1.30E-90	Dopamine receptor 3 [Caenorhabditis elegans]
	BIO1	g14642.t1	exon	N-S	Asp/Asn	8.60E-99	Dopamine receptor 3 [Caenorhabditis elegans]
TP380188	LONG;BIO12	g2283,t1	exon	N-S	Gln/Lys	2.00E-20	Smad4 protein [Strongyloides ratti]
TP381210	BIO5	g16473.t1	exon	N-S	Met/Leu	4.00E-52	Pyruvate kinase [Caenorhabditis elegans]
	BIO5	g16478.t1	exon	N-S	Met/Leu	3.90E-237	Pyruvate kinase [Caenorhabditis elegans]
TP376687	LAT;LONG;BIO5;BIO12;BIO18	g19212.t1	exon	S	Gly/Gly	4.00E-11	Putative esophageal gland cell protein Hgg-20 [Heterodera glycines]
TP378056	BIO12	g2309.t1	exon	S	Ala/Ala	2.00E-13	Homeobox protein ceh-13 [Toxocara canis]
TP364428	BIO5;BIO12	g19271.t1	exon	S	Ala/Ala	6.00E+00	40S ribosomal protein S8 [Trichinella zimbabwensis]
TP23005	BIO5	g10329.t1	intron	-	-	4.00E-26	UDP-GlucuronosylTransferase ugt-50 [Caenorhabditis elegans]
TP72228	LONG;BIO5	g6333.t1	intron	-	-	1.40E-252	Histone acetyltransferase [Globodera pallida]
TP252086	BIO1	g18821.t1	intron	-	-	2.00E-64	Esophageal gland-localized secretory protein 11 [Heterodera glycines]
TP294929	BIO18	g2441.t1	intron	-	-	2.00E-20	Zinc finger protein [Loa loa]
TP324827	LAT;LONG;BIO1;BIO12;BIO18	g3349.t1	intron	-	-	3.00E-32	Reverse transcriptase [Ancylostoma ceylanicum]
	LAT;LONG;BIO1;BIO12;BIO18	-	intergenic	-	-	-	no hit
	LAT;LONG;BIO1;BIO12;BIO18	-	intergenic	-	-	-	upstream 1179bp (g2720.t1) RNA-directed DNA polymerase (Reverse transcriptase) and Integrase domain containing protein [Haemonchus contortus]
TP357600	BIO18	g3805.t1	intron	-	-	1.00E-11	IPT/TIG domain protein [Ancylostoma duodenale]
TP367097	BIO18	g1894.t1	intron	-	-	7.00E-15	hypothetical protein Tcan_05389 [Toxocara canis]
TP357082	BIO1	g5748.t1	intron	-	-	3.70E-207	CDC-42 Guanine nucleotide Exchange Factor [Caenorhabditis elegans]
	BIO1	-	intergenic	-	-	-	upstream 1882bp (g6587.t1) nuclear receptor [Ciona intestinalis]
	BIO2	-	intergenic	-	-	-	no hit
	BIO3	-	intergenic	-	-	-	no hit
	BIO4	-	intergenic	-	-	-	no hit
TP165252	LONG;BIO12	-	intergenic	-	-	-	downstream 8bp (g3001.t1) Histone deacetylase [Globodera pallida]
	LONG;BIO12	-	intergenic	-	-	-	upstream 8bp (g3002.t1) Histone deacetylase [Globodera pallida]
	LONG;BIO12	g9418.t1	intron	-	-	1.90E-48	Uncharacterized protein [Globodera pallida]
TP146577	LAT;LONG;BIO5;BIO12;BIO18	-	intergenic	-	-	-	no hit
	LAT;LONG;BIO5;BIO12;BIO18	g19780.t1	intron	-	-	-	no hit
TP43713	LONG;BIO18	-	intergenic	-	-	-	upstream 117bp (g19787.t1) ATP-dependent DNA helicase [Globodera pallida]
	LONG;BIO18	-	intergenic	-	-	-	no hit
	LONG;BIO18	-	intergenic	-	-	-	no hit
	LONG;BIO18	-	intergenic	-	-	-	no hit
	LONG;BIO18	-	intergenic	-	-	-	upstream 1368bp (g6042.t1) RNA recognition domain-containing protein domain-containing protein [Loa loa]
TP66981	LONG;BIO1	-	intergenic	-	-	-	downstream 1312bp (g8394.t1) Uncharacterized protein [Caenorhabditis elegans]
	LONG;BIO1	-	intergenic	-	-	-	downstream 1311bp (g5002.t1)Uncharacterized protein [Rhodopseudomonas palustris (strain BisB18)]
TP77825	BIO5;BIO12	-	intergenic	-	-	-	downstream 1730bp (g5124.t1) Chaplin [Streptomyces sp. NRRL F-6602, low hit]
TP93057	BIO12	-	intergenic	-	-	-	no hit
TP150641	BIO1;BIO12	-	intergenic	-	-	-	downstream 125bp (g11824.t1) SWI/SNF global transcription activator complex subunit snf59-like isoform X9 [Salmo salar]
TP188858	BIO5	-	intergenic	-	-	-	no hit
TP226227	LONG;BIO5;BIO12;BIO18	-	intergenic	-	-	-	no hit
	LONG;BIO5;BIO12;BIO18	-	intergenic	-	-	-	downstream 910bp (g14547.t1) Si:dkey-11o15.5 (Fragment) [Danio rerio]
	LONG;BIO5;BIO12;BIO18	-	intergenic	-	-	-	downstream 780bp (g12205.t1) Kazal domain and Organic anion transporter polypeptide OATP family and Major facilitator superfamily domain, general substrate transporter-containing protein [Strongyloides ratti]
	LONG;BIO5;BIO12;BIO18	-	intergenic	-	-	-	upstream 759bp (g1981.t1) Kazal domain and Organic anion transporter polypeptide OATP family and Major facilitator superfamily domain, general substrate transporter-containing protein [Strongyloides ratti]
TP328804	BIO12	-	intergenic	-	-	-	no hit
	BIO12	-	intergenic	-	-	-	no hit
TP343323	BIO5	-	intergenic	-	-	-	upstream 1003bp (g4109.t1) Ubiquitin-like-conjugating enzyme ATG10 [Toxocara canis]
TP347957	LAT	-	intergenic	-	-	-	upstream 405bp (g16484.t2) Ankyrin-2 [Phytophthora nicotianae]
	LAT	-	intergenic	-	-	-	upstream 405bp (g13857.t1) Ankyrin-2 [Phytophthora nicotianae]
		-	intergenic	-	-	-	downstream 196bp (g13858.t1) Uncharacterized protein [Globodera pallida]
TP349617	BIO12	-	intergenic	-	-	-	downstream 911bp (g7516.t1) G-patch domain-containing protein [Wuchereria bancrofti]
	BIO12	-	intergenic	-	-	-	no hit
	BIO12	-	intergenic	-	-	-	no hit
TP359915	BIO1	-	intergenic	-	-	2.70E-15	upstream 1792bp (g13953.t1) Uncharacterized protein [Globodera pallida]
TP380020	BIO1;BIO12;BIO18	-	intergenic	-	-	-	no hit
TP384371	BIO1;BIO12	-	intergenic	-	-	5.40E-162	upstream 173bp (g12159.t1) Uncharacterized protein [Globodera pallida]

## Sheet: Suppl. table 4
Supplementary table 4. Loci under selection identified by BayPass
SNP	Associated covariables (BayPass)	GeneID	SNP location	S os N-S	Amino acid change	BLAST evalue	Best protein hit or nearest protein
TP108524	BIO1	g14559.t1	exon	N-S	Ala/Val	4.00E-04	Hypothetical protein CBG14357 [Haemonchus contortus]
TP115560	BIO1	g15989.t1	exon	N-S	Ala/Thr	1.00E-69	DNA-dependent RNA polymerase [Loa loa]
TP116676	BIO18	g6664.t1	exon	S	Pro/Pro	1.00E-11	Hypothetical protein ANCCEY_15723 [Ancylostoma ceylanicum]
	BIO18	g6666.t1	exon	S	Pro/Pro	6.00E-10	Uncharacterized protein [Globodera pallida]
TP122360	BIO1	g7250.t1	exon	N-S	Ser/Asn	3.00E-24	Ubiquitin-fold modifier-conjugating enzyme 1 [Necator americanus]
	BIO1	g7228.t1	exon	N-S	Ser/Asn	1.20E-10	Zinc finger CCHC-type containing 8 [Caenorhabditis briggsae]
TP173057	BIO18	g18364.t1	exon	S	Ile/Ile	2.00E-03	PDZ domain and Leucine-rich repeat and Leucine-rich repeat, typical subtype and Leucine rich repeat 4-containing protein [Strongyloides ratti]
	BIO18	g18329.t1	exon	S	Ile/Ile	2.00E-03	PDZ domain and Leucine-rich repeat and Leucine-rich repeat, typical subtype and Leucine rich repeat 4-containing protein [Strongyloides ratti]
TP178993	BIO12;BIO18	g18030	exon	S	Thr/Thr	3.00E-87	Superkiller viralicidic activity 2-like 2 [Ascaris suum]
TP186373	LAT;LONG;BIO5	g11228.t1	exon	S	Ser/Ser	7.00E-36	Hypothetical protein CAEBREN_12547 [Caenorhabditis brenneri]
	LAT;LONG;BIO5	g10907.t1	exon	S	Ser/Ser	1.90E-84	Putative DNA polymerase [Cyphomyrmex costatus]
TP2340	LONG	g6502.t1	exon	S	Val/Val	2.00E-67	MOZ/SAS family protein [Ancylostoma duodenale]
TP307906	LAT;LONG;BIO12	g3910.t1	exon	N-S	Asp/Gly	1.30E-195	Uncharacterized protein [Globodera pallida]
	LAT;LONG;BIO12	g19088.t1	exon	N-S	Asp/Gly	9.50E-01	UBX domain-containing protein [Glycine max]
TP333577	LAT;LONG;BIO12;BIO18	g16697.t1	exon	S	Leu/Leu	1.00E-110	Cadherin-4 [Caenorhabditis elegans]
TP339512	BIO5;BIO18	g14118	exon	S	Thr/Thr	9.00E-115	Myosin head [Necator americanus]
TP380188	LONG;BIO12	g2283,t1	exon	N-S	Gln/Lys	2.00E-20	Smad4 protein [Strongyloides ratti]
TP901	LAT	g15055.t1	exon	S	Asn/Asn	4.00E-28	putative G-protein coupled receptor C06G4.5 [Toxocara canis]
TP90117	LAT	g14123.t1	exon	S	Asn/Asn	7.10E-55	CBN-GLB-20 protein [Caenorhabditis brenneri]
	LAT	g14129.t1	exon	S	Asn/Asn	1.50E-39	GLoBin related [Caenorhabditis elegans]
	LAT	g11931.t1	exon	S	Asn/Asn	8.30E-55	CBN-GLB-20 protein [Caenorhabditis brenneri]
TP107089	BIO18	g10865.t1	intron	-	-	0.0027	Uncharacterized protein [Ustilaginoidea virens]
TP343274	LONG;BIO12	g12615	intron	-	-	2.00E-34	Regulator of G protein signaling domain protein [Ancylostoma duodenale]
TP34930	LONG	g7091.t1	intron	-	-	1.00E-199	Myosin-3 [Toxocara canis]
	LONG	g13640.t1	intron	-	-	4.50E-56	Myosin-3 [Caenorhabditis elegans]
TP47010	LONG	g12822.t1	intron	-	-	0.0012	Calcium-binding RTX toxin-like protein [Candidatus Symbiobacter mobilis]
TP73411	LAT	g5250.t1	intron	-	-	3.00E-53	Uncharacterized protein [Globodera pallida]
	LAT	g3713.t1	intron	-	-	5.30E-53	Uncharacterized protein [Globodera pallida]
	LAT	g3720.t1	intron	-	-	5.80E-53	Uncharacterized protein [Globodera pallida]
	LAT	g3721.t1	intron	-	-	1.70E-16	Uncharacterized protein [Globodera pallida]
TP201725	BIO12	-	intergenic	-	-	-	downstream 40bp (g4692.t1) no hits
TP203332	BIO5	-	intergenic	-	-	-	upstream 1488bp (g16748.t1)ap2 [Schmidtea mediterranea]
	BIO5	-	intergenic	-	-	-	downstream 1479bp (g16797.t1) Transcription factor AP-2 [Wuchereria bancrofti]
TP329425	LAT;BIO1;BIO5	-	intergenic	-	-	-	downstream 1893bp (g2512.t1) No hits
	LAT;BIO1;BIO5	-	intergenic	-	-	-	downstream 1275bp (g10241.t1) Uncharacterized protein [Meloidogyne hapla]
TP71152	LONG	-	intergenic	-	-	-	no hit
	LONG	-	intergenic	-	-	-	no hit

## Sheet: Suppl. table 5
Supplementary table 5. Loci under selection identified by BayeScEnv
SNP	Associated covariables (BayeScEnv)	GeneID	SNP location	S os N-S	Amino acid change	BLAST evalue	Best protein hit or nearest protein
TP16493	BIO1	g9631.t1	exon	S	Thr/Thr	5.00E-75	Exocyst complex component 5 [Toxocara canis]
	BIO1	g9671.t1	exon	S	Thr/Thr	3.20E-180	Exocyst complex component 5 [Caenorhabditis elegans]
TP181514	LONG;BIO1	g3633.t1	exon	S	Gly/Gly	1.60E-100	LET-19 [Caenorhabditis brenneri]
TP333577	BIO18	g16697.t1	exon	S	Leu/Leu	1.00E-110	Cadherin-4 [Caenorhabditis elegans]
TP333913	LONG;BIO1	g14626.t1	exon	S	Gly/Gly	1.60E-17	EGL-17 [Brugia malayi]
TP364091	BIO1	g14644.t1	exon	S	Pro/Pro	2.60E-104	Dopamine receptor 3 [Caenorhabditis elegans]
	BIO1	g14654.t1	exon	N-S	Asp/Asn	7.80E-99	Dopamine receptor 3 [Caenorhabditis elegans]
	BIO1	g14639.t1	exon	S	Pro/Pro	1.30E-90	Dopamine receptor 3 [Caenorhabditis elegans]
	BIO1	g14642.t1	exon	N-S	Asp/Asn	8.60E-99	Dopamine receptor 3 [Caenorhabditis elegans]
TP367626	LAT	g3700.t1	exon	S	Thr/Thr	3.00E-29	Putative diacylglycerol kinase K06A1.6 [Toxocara canis]
TP376687	BIO5	g19212.t1	exon	S	Gly/Gly	4.00E-11	Putative esophageal gland cell protein Hgg-20 [Heterodera glycines]
TP146577	LONG;BIO5	g15502.t1	intron	-	-	5.50E-50	CRE-GNRR-6 protein [Caenorhabditis remanei]
TP252086	BIO1	g18821.t1	Intron	-	-	2.00E-64	Esophageal gland-localized secretory protein 11 [Heterodera glycines]
TP324827	LAT;LONG;BIO1;BIO12	g3349.t1	intron	-	-	3.00E-32	Reverse transcriptase [Ancylostoma ceylanicum]
TP66981	LONG;BIO1	-	Intergenic	-	-	-	downstream 1312bp (g8394.t1) Uncharacterized protein [Caenorhabditis elegans]
	LONG;BIO1	-	Intergenic	-	-	-	downstream 1311bp (g5004.t1) Uncharacterized protein [Rhodopseudomonas palustris]
TP77825	BIO5	-	Intergenic	-	-	-	no hit
	BIO5	-	intergenic	-	-	-	downstream 1730bp (g5124.t1) Chaplin [Streptomyces sp. NRRL F-6602, low hit]
TP107771	LONG	-	Intergenic	-	-	-	near_mRNA_downstream_635bp
TP188858	BIO5	-	Intergenic	-	-	-	no hit
TP226227	BIO5	-	Intergenic	-	-	-	no hit
	BIO5	-	Intergenic	-	-	-	downstream 910bp (g14547.t1) Si:dkey-11o15.5 (Fragment) [Danio rerio]
	BIO5	-	Intergenic	-	-	-	downstream 780bp (g12205.t1) Kazal domain and Organic anion transporter polypeptide OATP family and Major facilitator superfamily domain, general substrate transporter-containing protein [Strongyloides ratti]
	BIO5	-	Intergenic	-	-	-	upstream 759bp (g1981.t1) Kazal domain and Organic anion transporter polypeptide OATP family and Major facilitator superfamily domain, general substrate transporter-containing protein [Strongyloides ratti]
TP380020	BIO1;BIO12	-	intergenic	-	-	-	no hit

## Sheet: Suppl. table 6
Supplementary table 6.
TP	position	Gene	Info	Type	TypeExtended	IL4	KS2	ON1	ON34
TP146577	-50000_to_-40000					Major allele frequency
TP146577	-50000_to_-40000	g15497.t1		del	frameshift_variant	1	1	1	1
TP146577	-50000_to_-40000	g15497.t1		complex,mnp	frameshift_variant&missense_variant	1	1	1	1
TP146577	-50000_to_-40000	g15497.t1		del	frameshift_variant	1	1	1	1
TP146577	-50000_to_-40000	g15497.t1		snp	stop_gained&splice_region_variant	1	1	0.989247	1
TP146577	-50000_to_-40000	g15497.t1		snp	stop_lost&splice_region_variant	1	1	1	1
TP146577	-50000_to_-40000	g15498.t1		del	frameshift_variant&splice_region_variant	1	1	0.931034	1
TP146577	-50000_to_-40000	g15498.t1		complex,mnp	splice_donor_variant&missense_variant&splice_region_variant&intron_variant	1	1	1	1
TP146577	-40000_to_-30000
TP146577	-40000_to_-30000	g15498.t1		del	frameshift_variant	1	1	1	1
TP146577	-40000_to_-30000	g15498.t1		del	frameshift_variant	1	1	0.912281	1
TP146577	-40000_to_-30000	g15498.t1		snp	splice_donor_variant&intron_variant	1	1	0.909091	1
TP146577	-40000_to_-30000	g15498.t1		complex,snp	frameshift_variant&synonymous_variant	1	1	1	1
TP146577	-40000_to_-30000	g15498.t1		snp	splice_donor_variant&intron_variant	1	1	1	1
TP146577	-40000_to_-30000	g15499.t1	condensin complex subunit 1 [Ascaris suum]	del	frameshift_variant	1	1	1	1
TP146577	-40000_to_-30000	g15499.t1	condensin complex subunit 1 [Ascaris suum]	del	frameshift_variant	1	1	1	0
TP146577	-40000_to_-30000	g15499.t1	condensin complex subunit 1 [Ascaris suum]	del	frameshift_variant	1	1	1	1
TP146577	-40000_to_-30000	g15499.t1	condensin complex subunit 1 [Ascaris suum]	ins	frameshift_variant	1	1	1	1
TP146577	-40000_to_-30000	g15499.t1	condensin complex subunit 1 [Ascaris suum]	snp	splice_acceptor_variant&intron_variant	1	1	1	1
TP146577	-40000_to_-30000	g15499.t1	condensin complex subunit 1 [Ascaris suum]	del	frameshift_variant	1	1	1	1
TP146577	-30000_to_-20000
TP146577	-30000_to_-20000	g15500.t1	threonine aspartase 1 [Ascaris suum]	del	frameshift_variant	1	1	1	1
TP146577	-30000_to_-20000	g15500.t1	threonine aspartase 1 [Ascaris suum]	snp	splice_acceptor_variant&intron_variant	1	1	1	1
TP146577	-30000_to_-20000	g15500.t1	threonine aspartase 1 [Ascaris suum]	snp	stop_gained	1	1	1	1
TP146577	-20000_to_-10000
TP146577	-20000_to_-10000	g15501.t1	Gonadotropin-releasing hormone receptor [Toxocara canis]	complex	stop_gained	1	1	1	1
TP146577	-10000_to_0
TP146577	-10000_to_0	g15502.t1	G protein-coupled receptor, partial [Pristionchus pacificus]	complex,ins	frameshift_variant&start_lost&initiator_codon_variant	1	0.833333	0.6	0
TP146577	-10000_to_0	g15502.t1	G protein-coupled receptor, partial [Pristionchus pacificus]	snp	splice_donor_variant&intron_variant	0.9875	0.757143	0.858108	1
TP146577	-10000_to_0	g15502.t1	G protein-coupled receptor, partial [Pristionchus pacificus]	complex	frameshift_variant&synonymous_variant	1	1	1	1
TP146577	-10000_to_0	g15502.t1	G protein-coupled receptor, partial [Pristionchus pacificus]	complex	splice_acceptor_variant&missense_variant&splice_region_variant&intron_variant	1	1	1	1
TP146577	-10000_to_0	g15502.t1	G protein-coupled receptor, partial [Pristionchus pacificus]	ins	splice_acceptor_variant&intron_variant	1	1	1	1
TP146577	-10000_to_0	g15502.t1	G protein-coupled receptor, partial [Pristionchus pacificus]	snp	stop_gained	0.947368	1	1	1
TP146577	-10000_to_0	g15502.t1	G protein-coupled receptor, partial [Pristionchus pacificus]	del	frameshift_variant	1	0.9375	1	1
TP146577	-10000_to_0	g15502.t1	G protein-coupled receptor, partial [Pristionchus pacificus]	snp	stop_gained	1	1	1	0
TP146577	-10000_to_0	g15502.t1	G protein-coupled receptor, partial [Pristionchus pacificus]	complex,mnp	frameshift_variant&missense_variant	1	1	1	1
TP146577	-10000_to_0	g15502.t1	G protein-coupled receptor, partial [Pristionchus pacificus]	ins	frameshift_variant	1	1	1	1
TP146577	-10000_to_0	g15502.t1	G protein-coupled receptor, partial [Pristionchus pacificus]	complex	splice_donor_variant&splice_region_variant&synonymous_variant&intron_variant	1	1	1	1
TP146577	0_to_10000
TP146577	0_to_10000	g15503.t1	fact complex subunit ssrp1-a [Ascaris suum]	snp	stop_lost&splice_region_variant	1	1	1	1
TP146577	10000_to_20000
TP146577	10000_to_20000	g15504.t1	Atrial natriuretic peptide receptor 1 [Toxocara canis]	del	frameshift_variant	1	0.925926	1	1
TP146577	10000_to_20000	g15504.t1	Atrial natriuretic peptide receptor 1 [Toxocara canis]	snp	stop_gained	1	1	1	1
TP146577	10000_to_20000	g15504.t1	Atrial natriuretic peptide receptor 1 [Toxocara canis]	snp	stop_gained	0.923077	1	1	1
TP146577	10000_to_20000	g15504.t1	Atrial natriuretic peptide receptor 1 [Toxocara canis]	del	splice_acceptor_variant&intron_variant	1	1	1	1
TP146577	20000_to_30000
TP146577	20000_to_30000	g15506.t1		snp	splice_acceptor_variant&intron_variant	1	1	1	0.714286
TP146577	20000_to_30000	g15506.t1		ins	frameshift_variant	1	0.75	0.875	1
TP146577	20000_to_30000	g15507.t1		complex,snp	stop_gained	1	1	1	1
TP146577	20000_to_30000	g15507.t1		ins	frameshift_variant	1	1	1	1
TP146577	20000_to_30000	g15507.t1		ins	frameshift_variant	1	0.977273	1	0.722222
TP146577	20000_to_30000	g15507.t1		ins	frameshift_variant	1	1	1	1
TP146577	20000_to_30000	g15507.t1		ins,ins	frameshift_variant	1	0.930233	1	0.583333
TP146577	20000_to_30000	g15507.t1		complex,snp	splice_acceptor_variant&splice_region_variant&intron_variant	1	0.93617	1	0.4
TP146577	20000_to_30000	g15507.t1		mnp,snp	stop_gained	1	1	1	0.583333
TP146577	20000_to_30000	g15507.t1		del	frameshift_variant	1	1	1	1
TP146577	20000_to_30000	g15507.t1		del,snp	frameshift_variant&start_lost	1	1	1	1
TP146577	20000_to_30000	g15507.t1		snp	start_lost	1	1	1	1
TP146577	20000_to_30000	g15508.t2		del	frameshift_variant&splice_acceptor_variant&splice_region_variant&intron_variant	1	1	1	1
TP146577	20000_to_30000	g15509.t1		complex	frameshift_variant&missense_variant&splice_region_variant	1	1	1	0
TP146577	20000_to_30000	g15509.t1		ins	splice_donor_variant&intron_variant	1	1	1	0
TP146577	20000_to_30000	g15509.t1		del,del	frameshift_variant	1	0.947368	0.833333	0
TP146577	20000_to_30000	g15510.t1	Potassium channel subfamily K member 18 [Strongyloides ratti]	complex,snp	frameshift_variant&missense_variant	1	1	0.6	1
TP146577	30000_to_40000
TP146577	30000_to_40000	g15510.t1	Potassium channel subfamily K member 18 [Strongyloides ratti]	del	frameshift_variant	1	1	1	1
TP146577	30000_to_40000	g15510.t1	Potassium channel subfamily K member 18 [Strongyloides ratti]	snp	stop_gained	1	1	1	1
TP146577	30000_to_40000	g15510.t1	Potassium channel subfamily K member 18 [Strongyloides ratti]	del	frameshift_variant	0.935484	1	1	1
TP146577	30000_to_40000	g15511.t1	C. briggsae CBR-TWK-29 protein [Caenorhabditis briggsae]	ins	frameshift_variant	1	1	0	1
TP146577	30000_to_40000	g15511.t1	C. briggsae CBR-TWK-29 protein [Caenorhabditis briggsae]	ins	frameshift_variant	1	1	0	1
TP146577	40000_to_50000
TP146577	40000_to_50000	g15511.t1	C. briggsae CBR-TWK-29 protein [Caenorhabditis briggsae]	del	frameshift_variant	0.913043	1	1	1
TP146577	40000_to_50000	g15512.t1	Amidohydrolase 1 domain containing protein [Haemonchus contortus]	del	frameshift_variant	0.833333	1	1	0
TP146577	40000_to_50000	g15512.t1	Amidohydrolase 1 domain containing protein [Haemonchus contortus]	del	frameshift_variant	1	0.882353	1	1
TP146577	40000_to_50000	g15512.t1	Amidohydrolase 1 domain containing protein [Haemonchus contortus]	ins	frameshift_variant	1	1	1	1
TP146577	40000_to_50000	g15513.t1		del	frameshift_variant	1	0.948718	1	1
TP146577	40000_to_50000	g15513.t1		snp	splice_donor_variant&intron_variant	1	1	1	1
TP146577	40000_to_50000	g15513.t1		del	frameshift_variant	1	1	1	0.777778
TP146577	40000_to_50000	g15513.t1		ins	splice_donor_variant&intron_variant	1	1	1	1
TP146577	40000_to_50000	g15513.t1		del	frameshift_variant	1	1	1	1
TP	position	Gene	Info	Type	TypeExtended	IL4	KS2	ON1	ON34
TP173057	-50000_to_-40000
TP173057	-50000_to_-40000	g18358.t2	f-box only protein 30 [Ascaris suum]	complex,complex	splice_donor_variant&missense_variant&splice_region_variant&intron_variant	0.0625	0.807692	0.606061	1
TP173057	-50000_to_-40000	g18358.t2	f-box only protein 30 [Ascaris suum]	complex,complex	splice_acceptor_variant&missense_variant&splice_region_variant&intron_variant	0.884615	0.704545	0.855556	1
TP173057	-50000_to_-40000	g18358.t2	f-box only protein 30 [Ascaris suum]	snp	stop_gained&splice_region_variant	1	1	1	1
TP173057	-50000_to_-40000	g18358.t2	f-box only protein 30 [Ascaris suum]	del	frameshift_variant	1	0.894737	1	1
TP173057	-50000_to_-40000	g18358.t2	f-box only protein 30 [Ascaris suum]	del	frameshift_variant	1	1	1	1
TP173057	-50000_to_-40000	g18358.t1	f-box only protein 30 [Ascaris suum]	mnp	splice_donor_variant&splice_region_variant&synonymous_variant&intron_variant	1	1	1	1
TP173057	-50000_to_-40000	g18326.t1		del	frameshift_variant	1	1	0	0
TP173057	-50000_to_-40000	g18326.t1		del	frameshift_variant	1	1	0	0
TP173057	-50000_to_-40000	g18326.t1		del	frameshift_variant	1	1	1	0
TP173057	-40000_to_-30000
TP173057	-40000_to_-30000	g18359.t1	GATA zinc finger, partial [Oesophagostomum dentatum]	del	frameshift_variant	1	1	1	1
TP173057	-40000_to_-30000	g18359.t1	GATA zinc finger, partial [Oesophagostomum dentatum]	del	frameshift_variant	1	1	1	1
TP173057	-40000_to_-30000	g18359.t1	GATA zinc finger, partial [Oesophagostomum dentatum]	del	frameshift_variant	1	1	1	1
TP173057	-40000_to_-30000	g18359.t1	GATA zinc finger, partial [Oesophagostomum dentatum]	complex	splice_acceptor_variant&splice_region_variant&synonymous_variant&intron_variant	1	1	1	0
TP173057	-40000_to_-30000	g18359.t1	GATA zinc finger, partial [Oesophagostomum dentatum]	snp	stop_gained	1	1	1	1
TP173057	-40000_to_-30000	g18327.t1	Protein CBR-CLEC-223 [Caenorhabditis briggsae]	del	frameshift_variant	1	1	1	0
TP173057	-40000_to_-30000	g18327.t1	Protein CBR-CLEC-223 [Caenorhabditis briggsae]	snp	stop_gained	1	0.857143	0.962963	1
TP173057	-40000_to_-30000	g18327.t1	Protein CBR-CLEC-223 [Caenorhabditis briggsae]	snp	stop_gained	0.952381	1	1	1
TP173057	-40000_to_-30000	g18327.t1	Protein CBR-CLEC-223 [Caenorhabditis briggsae]	complex,ins	frameshift_variant	1	1	1	1
TP173057	-40000_to_-30000	g18327.t1	Protein CBR-CLEC-223 [Caenorhabditis briggsae]	ins	frameshift_variant	0.941176	0.956522	1	1
TP173057	-30000_to_-20000
TP173057	-30000_to_-20000	g18360.t1		complex,ins	frameshift_variant&missense_variant	0.0243902	0	0	0
TP173057	-30000_to_-20000	g18360.t1		snp	splice_acceptor_variant&intron_variant	1	1	1	1
TP173057	-30000_to_-20000	g18361.t1	Phorbol ester/diacylglycerol-binding protein unc-13 [Toxocara canis]	snp	splice_acceptor_variant&intron_variant	0.875	1	1	0
TP173057	-30000_to_-20000	g18361.t1	Phorbol ester/diacylglycerol-binding protein unc-13 [Toxocara canis]	complex,snp	stop_gained	1	0.944444	1	1
TP173057	-30000_to_-20000	g18361.t1	Phorbol ester/diacylglycerol-binding protein unc-13 [Toxocara canis]	ins	frameshift_variant	1	0.941176	1	1
TP173057	-20000_to_-10000
TP173057	-20000_to_-10000	g18362.t1	phorbol ester/diacylglycerol-binding protein unc-13 [Loa loa]	snp	stop_gained	0.909091	1	1	1
TP173057	-20000_to_-10000	g18362.t1	phorbol ester/diacylglycerol-binding protein unc-13 [Loa loa]	ins,snp	frameshift_variant	1	1	1	1
TP173057	-20000_to_-10000	g18362.t1	phorbol ester/diacylglycerol-binding protein unc-13 [Loa loa]	del	frameshift_variant	1	1	1	1
TP173057	-20000_to_-10000	g18362.t1	phorbol ester/diacylglycerol-binding protein unc-13 [Loa loa]	del	frameshift_variant	1	1	1	1
TP173057	-20000_to_-10000	g18362.t1	phorbol ester/diacylglycerol-binding protein unc-13 [Loa loa]	ins	frameshift_variant	1	1	1	1
TP173057	-20000_to_-10000	g18362.t1	phorbol ester/diacylglycerol-binding protein unc-13 [Loa loa]	snp	splice_donor_variant&intron_variant	1	1	1	1
TP173057	-20000_to_-10000	g18362.t1	phorbol ester/diacylglycerol-binding protein unc-13 [Loa loa]	del	frameshift_variant	1	1	1	1
TP173057	-20000_to_-10000	g18328.t1	Protein lap1 [Toxocara canis]	snp	start_lost	0.0606061	0.366667	0.241379	0
TP173057	-20000_to_-10000	g18328.t1	Protein lap1 [Toxocara canis]	snp	stop_gained	1	1	0.882353	1
TP173057	-20000_to_-10000	g18328.t1	Protein lap1 [Toxocara canis]	ins,snp	frameshift_variant	0.9	0.65625	0.625	1
TP173057	-20000_to_-10000	g18328.t1	Protein lap1 [Toxocara canis]	del,snp	frameshift_variant	0.521739	0.92	0.875	1
TP173057	-20000_to_-10000	g18328.t1	Protein lap1 [Toxocara canis]	complex,snp,snp	frameshift_variant&splice_acceptor_variant&splice_region_variant&synonymous_variant&intron_variant	0.243243	0.95122	0.545455	0
TP173057	-20000_to_-10000	g18328.t1	Protein lap1 [Toxocara canis]	ins,ins	frameshift_variant	0.65625	0.761905	0.64	0
TP173057	-20000_to_-10000	g18328.t1	Protein lap1 [Toxocara canis]	complex	splice_acceptor_variant&splice_region_variant&synonymous_variant&intron_variant	1	1	1	1
TP173057	-20000_to_-10000	g18328.t1	Protein lap1 [Toxocara canis]	complex,complex	stop_gained	1	1	1	0
TP173057	-20000_to_-10000	g18328.t1	Protein lap1 [Toxocara canis]	complex,snp	frameshift_variant&synonymous_variant	0.105263	0.933333	0.666667	0
TP173057	-10000_to_0
TP173057	-10000_to_0	g18363.t1		complex,complex	stop_lost&splice_region_variant	1	1	1	1
TP173057	-10000_to_0	g18363.t1		del	frameshift_variant	0.9375	0.5	0.612903	0
TP173057	-10000_to_0	g18328.t1	Protein lap1 [Toxocara canis]	ins	splice_acceptor_variant&intron_variant	1	1	1	1
TP173057	-10000_to_0	g18328.t1	Protein lap1 [Toxocara canis]	complex,ins	stop_gained	1	1	1	1
TP173057	-10000_to_0	g18328.t1	Protein lap1 [Toxocara canis]	complex	frameshift_variant&missense_variant	1	1	1	1
TP173057	-10000_to_0	g18328.t1	Protein lap1 [Toxocara canis]	mnp	stop_gained	0.82	1	0.819672	1
TP173057	-10000_to_0	g18328.t1	Protein lap1 [Toxocara canis]	del	frameshift_variant	0.75	1	0.769231	0.333333
TP173057	-10000_to_0	g18328.t1	Protein lap1 [Toxocara canis]	del	splice_acceptor_variant&intron_variant	1	1	1	1
TP173057	-10000_to_0	g18328.t1	Protein lap1 [Toxocara canis]	ins	frameshift_variant&stop_gained&splice_region_variant	1	1	1	1
TP173057	-10000_to_0	g18328.t1	Protein lap1 [Toxocara canis]	del	frameshift_variant	1	1	1	0.777778
TP173057	-10000_to_0	g18329.t1		complex	start_lost&inframe_deletion	0.922222	0.803571	1	1
TP173057	-10000_to_0	g18329.t1		complex	frameshift_variant&missense_variant	0.918605	0.816667	1	1
TP173057	-10000_to_0	g18329.t1		ins	frameshift_variant	0.914894	0.794118	0.973333	1
TP173057	0_to_10000
TP173057	0_to_10000	g18364.t1		del	frameshift_variant	0.979167	0.810811	0.606061	1
TP173057	0_to_10000	g18364.t1		del	frameshift_variant	0.47619	1	0.971429	0.9
TP173057	0_to_10000	g18364.t1		snp	stop_gained	0.37931	1	0.984615	1
TP173057	0_to_10000	g18365.t1	85 kda calcium-independent phospholipase a2 [Ascaris suum]	snp	start_lost	1	1	0.904762	1
TP173057	0_to_10000	g18365.t1	85 kda calcium-independent phospholipase a2 [Ascaris suum]	del	frameshift_variant	0.566038	1	1	1
TP173057	0_to_10000	g18365.t1	85 kda calcium-independent phospholipase a2 [Ascaris suum]	ins	frameshift_variant&stop_lost&splice_region_variant	1	0.9	0.845455	1
TP173057	0_to_10000	g18365.t1	85 kda calcium-independent phospholipase a2 [Ascaris suum]	snp	stop_lost&splice_region_variant	0.326923	0.709677	0.64486	1
TP173057	0_to_10000	g18330.t1		snp	start_lost	1	0.843137	1	1
TP173057	0_to_10000	g18330.t1		del,snp	frameshift_variant	0.6	0.619048	0.72973	1
TP173057	0_to_10000	g18330.t1		ins	frameshift_variant	0.9375	0.909091	0.85	1
TP173057	0_to_10000	g18330.t1		snp	stop_gained	1	0.947368	1	1
TP173057	0_to_10000	g18330.t1		del	frameshift_variant	0.941176	1	1	1
TP173057	0_to_10000	g18331.t1		del	frameshift_variant&start_lost	1	1	1	1
TP173057	0_to_10000	g18331.t1		ins	frameshift_variant	0.837838	1	1	1
TP173057	0_to_10000	g18331.t1		del	frameshift_variant	1	1	1	1
TP173057	0_to_10000	g18331.t1		snp	stop_lost&splice_region_variant	1	1	0.608696	0
TP173057	0_to_10000	g18332.t1	Protein scribble-like protein, partial [Stegodyphus mimosarum]	complex	frameshift_variant&synonymous_variant	0.809524	1	1	1
TP173057	0_to_10000	g18332.t1	Protein scribble-like protein, partial [Stegodyphus mimosarum]	ins	splice_acceptor_variant&intron_variant	1	1	1	1
TP173057	0_to_10000	g18332.t1	Protein scribble-like protein, partial [Stegodyphus mimosarum]	complex	stop_gained	1	1	1	1
TP173057	0_to_10000	g18332.t1	Protein scribble-like protein, partial [Stegodyphus mimosarum]	del	frameshift_variant	1	0.903846	0.688889	0
TP173057	0_to_10000	g18332.t1	Protein scribble-like protein, partial [Stegodyphus mimosarum]	ins	frameshift_variant	1	1	1	1
TP173057	0_to_10000	g18332.t1	Protein scribble-like protein, partial [Stegodyphus mimosarum]	snp	splice_donor_variant&intron_variant	1	1	1	1
TP173057	0_to_10000	g18332.t1	Protein scribble-like protein, partial [Stegodyphus mimosarum]	del	frameshift_variant&splice_donor_variant&splice_region_variant&intron_variant	1	0.666667	0.833333	0
TP173057	0_to_10000	g18332.t1	Protein scribble-like protein, partial [Stegodyphus mimosarum]	mnp	stop_gained&splice_region_variant	0.5	0.703125	0.54717	0
TP173057	10000_to_20000
TP173057	10000_to_20000	g18333.t1		snp	stop_gained	1	1	0.990291	1
TP173057	10000_to_20000	g18334.t1		del	frameshift_variant	0.9	1	0.9	0
TP173057	20000_to_30000
TP173057	20000_to_30000	g18366.t1	lysine--trna ligase [Ascaris suum]	del	frameshift_variant	1	1	1	0
TP173057	20000_to_30000	g18366.t1	lysine--trna ligase [Ascaris suum]	del	frameshift_variant	1	0.888889	1	0
TP173057	20000_to_30000	g18366.t1	lysine--trna ligase [Ascaris suum]	del	frameshift_variant	0.916667	1	1	0
TP173057	20000_to_30000	g18335.t1	85/88 kDa calcium-independent phospholipase A2 [Strongyloides ratti]	ins	frameshift_variant&start_lost	0.833333	1	0.918919	1
TP173057	20000_to_30000	g18335.t1	85/88 kDa calcium-independent phospholipase A2 [Strongyloides ratti]	del	frameshift_variant	1	1	1	1
TP173057	20000_to_30000	g18335.t1	85/88 kDa calcium-independent phospholipase A2 [Strongyloides ratti]	snp	stop_gained	1	1	1	0
TP173057	30000_to_40000
TP173057	30000_to_40000	g18367.t1	Drosophila CRumBs homolog [Caenorhabditis elegans]	del	frameshift_variant&start_lost	0.956522	1	1	0
TP173057	30000_to_40000	g18368.t1	mTERF domain-containing protein 1, mitochondrial [Toxocara canis]	complex,snp,snp	frameshift_variant&missense_variant	0.546875	0.631579	0.558824	0.727273
TP173057	30000_to_40000	g18368.t1	mTERF domain-containing protein 1, mitochondrial [Toxocara canis]	ins	frameshift_variant	0.52459	0.605263	0.565217	0.75
TP173057	30000_to_40000	g18368.t1	mTERF domain-containing protein 1, mitochondrial [Toxocara canis]	snp	splice_acceptor_variant&intron_variant	1	1	1	1
TP173057	30000_to_40000	g18368.t1	mTERF domain-containing protein 1, mitochondrial [Toxocara canis]	snp	splice_donor_variant&intron_variant	0.9375	1	1	1
TP173057	30000_to_40000	g18368.t1	mTERF domain-containing protein 1, mitochondrial [Toxocara canis]	snp	stop_gained&splice_region_variant	1	1	1	1
TP173057	30000_to_40000	g18335.t1	85/88 kDa calcium-independent phospholipase A2 [Strongyloides ratti]	del	frameshift_variant	1	1	1	1
TP173057	40000_to_50000
TP173057	40000_to_50000	g18368.t1	mTERF domain-containing protein 1, mitochondrial [Toxocara canis]	snp	start_lost	1	0.866667	1	0
TP173057	40000_to_50000	g18369.t2	Mitochondrial import receptor subunit TOM22 -like protein [Toxocara canis]	del,snp	frameshift_variant	1	0.826087	1	1
TP173057	40000_to_50000	g18335.t1	85/88 kDa calcium-independent phospholipase A2 [Strongyloides ratti]	ins	frameshift_variant	0.722222	1	0.84	1
TP173057	40000_to_50000	g18335.t1	85/88 kDa calcium-independent phospholipase A2 [Strongyloides ratti]	ins	frameshift_variant	1	1	0.925926	1
TP173057	40000_to_50000	g18335.t1	85/88 kDa calcium-independent phospholipase A2 [Strongyloides ratti]	del,mnp	frameshift_variant	1	1	0.925926	1
TP173057	40000_to_50000	g18336.t1	85/88 kDa calcium-independent phospholipase A2 [Toxocara canis]	ins	frameshift_variant	1	1	1	1
TP173057	40000_to_50000	g18336.t1	85/88 kDa calcium-independent phospholipase A2 [Toxocara canis]	snp	stop_gained	0.837209	0.980392	0.714286	1
TP173057	40000_to_50000	g18336.t1	85/88 kDa calcium-independent phospholipase A2 [Toxocara canis]	complex	splice_donor_variant&missense_variant&splice_region_variant&intron_variant	1	1	1	1
TP	position	Gene	Info	Type	TypeExtended	IL4	KS2	ON1	ON34
TP181514	-50000_to_-40000
TP181514	-40000_to_-30000
TP181514	-40000_to_-30000	g3627.t1		del	frameshift_variant&stop_lost&splice_region_variant	1	1	1	1
TP181514	-30000_to_-20000
TP181514	-20000_to_-10000
TP181514	-20000_to_-10000	g3631.t1		complex	stop_gained&splice_donor_variant&splice_region_variant&intron_variant	0	1	0	0
TP181514	-20000_to_-10000	g3631.t1		ins	frameshift_variant	0	0	0	0
TP181514	-20000_to_-10000	g3631.t1		complex,snp	stop_gained	0	0	0	0
TP181514	-20000_to_-10000	g3631.t1		del,snp	frameshift_variant	0	0	0	0
TP181514	-20000_to_-10000	g3631.t1		complex	frameshift_variant&missense_variant	0	0	0	0
TP181514	-20000_to_-10000	g3631.t1		del	frameshift_variant	0.333333	0.363636	0.555556	0
TP181514	-20000_to_-10000	g3632.t1	arginine kinase [Heterodera glycines]	complex	frameshift_variant&synonymous_variant	0	1	0	0
TP181514	-20000_to_-10000	g3632.t1	arginine kinase [Heterodera glycines]	snp	stop_gained	1	1	1	0
TP181514	-20000_to_-10000	g3632.t1	arginine kinase [Heterodera glycines]	complex,snp	stop_gained	0	1	0	1
TP181514	-20000_to_-10000	g3632.t1	arginine kinase [Heterodera glycines]	snp	stop_gained	0	1	0	0
TP181514	-20000_to_-10000	g3632.t1	arginine kinase [Heterodera glycines]	ins	frameshift_variant	0	1	0	0
TP181514	-20000_to_-10000	g3632.t1	arginine kinase [Heterodera glycines]	del	splice_donor_variant&intron_variant	0	0	0	0
TP181514	-10000_to_0
TP181514	-10000_to_0	g3633.t1	mediator of rna polymerase ii transcription subunit 13-like protein [Ascaris suum]	complex	frameshift_variant&missense_variant	1	1	1	1
TP181514	-10000_to_0	g3633.t1	mediator of rna polymerase ii transcription subunit 13-like protein [Ascaris suum]	complex,complex,ins	frameshift_variant&missense_variant	0	0.380952	0.4	0
TP181514	-10000_to_0	g3633.t1	mediator of rna polymerase ii transcription subunit 13-like protein [Ascaris suum]	ins	frameshift_variant	0.272727	0.869565	0.769231	1
TP181514	-10000_to_0	g3633.t1	mediator of rna polymerase ii transcription subunit 13-like protein [Ascaris suum]	complex,complex,del	frameshift_variant&missense_variant	0.272727	0.869565	0.788462	1
TP181514	-10000_to_0	g3633.t1	mediator of rna polymerase ii transcription subunit 13-like protein [Ascaris suum]	snp	splice_donor_variant&intron_variant	1	1	1	1
TP181514	-10000_to_0	g3633.t1	mediator of rna polymerase ii transcription subunit 13-like protein [Ascaris suum]	del,snp	frameshift_variant	0.771429	0.69697	0.615385	0.111111
TP181514	-10000_to_0	g3633.t1	mediator of rna polymerase ii transcription subunit 13-like protein [Ascaris suum]	del	frameshift_variant	1	1	1	1
TP181514	-10000_to_0	g3633.t1	mediator of rna polymerase ii transcription subunit 13-like protein [Ascaris suum]	del	frameshift_variant	1	0.941176	1	1
TP181514	-10000_to_0	g3633.t1	mediator of rna polymerase ii transcription subunit 13-like protein [Ascaris suum]	snp	stop_gained	0.904762	1	1	1
TP181514	-10000_to_0	g3633.t1	mediator of rna polymerase ii transcription subunit 13-like protein [Ascaris suum]	complex,snp	splice_donor_variant&missense_variant&splice_region_variant&intron_variant	0.28125	0.806452	0.416667	1
TP181514	0_to_10000
TP181514	0_to_10000	g3633.t1	mediator of rna polymerase ii transcription subunit 13-like protein [Ascaris suum]	del	frameshift_variant	1	1	1	1
TP181514	0_to_10000	g3633.t1	mediator of rna polymerase ii transcription subunit 13-like protein [Ascaris suum]	complex,snp	frameshift_variant&splice_donor_variant&splice_region_variant&synonymous_variant&intron_variant	0.868421	0.84375	0.890411	1
TP181514	0_to_10000	g3633.t1	mediator of rna polymerase ii transcription subunit 13-like protein [Ascaris suum]	snp	stop_gained	1	1	1	0.75
TP181514	0_to_10000	g3633.t1	mediator of rna polymerase ii transcription subunit 13-like protein [Ascaris suum]	del	frameshift_variant	1	1	1	1
TP181514	10000_to_20000
TP181514	10000_to_20000	g3634.t1		del	frameshift_variant	1	1	1	1
TP181514	10000_to_20000	g3634.t1		complex,del	frameshift_variant	1	1	1	1
TP181514	10000_to_20000	g3634.t1		snp	start_lost	1	1	1	0.6
TP181514	10000_to_20000	g3634.t1		complex	start_lost	1	1	1	1
TP181514	20000_to_30000
TP181514	30000_to_40000
TP181514	30000_to_40000	g3636.t1		snp	stop_gained	1	0.933333	1	0
TP181514	30000_to_40000	g3636.t1		snp	splice_acceptor_variant&intron_variant	1	1	1	1
TP181514	30000_to_40000	g3637.t1	VRFamide-like peptide, partial [Globodera pallida]	snp	splice_donor_variant&intron_variant	1	0.857143	0.8	1
TP181514	30000_to_40000	g3637.t1	VRFamide-like peptide, partial [Globodera pallida]	complex	frameshift_variant&stop_gained	1	1	1	1
TP181514	30000_to_40000	g3637.t1	VRFamide-like peptide, partial [Globodera pallida]	del	frameshift_variant	1	1	1	1
TP181514	40000_to_50000
TP181514	40000_to_50000	g3639.t1		snp	splice_donor_variant&intron_variant	1	0.913043	1	1
TP181514	40000_to_50000	g3640.t1		snp	start_lost	0.925926	1	1	1
TP181514	40000_to_50000	g3640.t1		del,snp	frameshift_variant	1	1	1	1
TP181514	40000_to_50000	g3640.t1		del,snp,snp	frameshift_variant	0.853659	0.767442	0.835821	1
TP181514	40000_to_50000	g3641.t1	CRE-EHBP-1 protein [Caenorhabditis remanei]	snp	start_lost	1	1	0.928571	1
TP181514	40000_to_50000	g3641.t1	CRE-EHBP-1 protein [Caenorhabditis remanei]	snp	splice_acceptor_variant&intron_variant	1	1	1	1
TP181514	40000_to_50000	g3641.t1	CRE-EHBP-1 protein [Caenorhabditis remanei]	ins	frameshift_variant	0.928571	1	1	1
TP181514	40000_to_50000	g3641.t1	CRE-EHBP-1 protein [Caenorhabditis remanei]	ins	splice_acceptor_variant&intron_variant	1	1	1	1
TP	position	Gene	Info	Type	TypeExtended	IL4	KS2	ON1	ON34
TP188858	-50000_to_-40000
TP188858	-50000_to_-40000	g6764.t1		del	frameshift_variant	1	1	1	1
TP188858	-50000_to_-40000	g6764.t1		complex,snp	frameshift_variant&missense_variant	0	0	0	0
TP188858	-50000_to_-40000	g6764.t1		ins	frameshift_variant	0	0	0	0
TP188858	-50000_to_-40000	g6765.t1		snp	start_lost	1	1	1	1
TP188858	-50000_to_-40000	g6765.t1		snp	splice_acceptor_variant&intron_variant	1	1	1	1
TP188858	-50000_to_-40000	g6765.t1		del	frameshift_variant	1	1	1	1
TP188858	-50000_to_-40000	g6765.t1		ins	frameshift_variant	1	1	1	1
TP188858	-50000_to_-40000	g6765.t1		ins	frameshift_variant	1	1	1	1
TP188858	-50000_to_-40000	g6765.t1		del	frameshift_variant	1	1	1	1
TP188858	-50000_to_-40000	g6765.t1		del	frameshift_variant&splice_region_variant	1	1	1	0
TP188858	-50000_to_-40000	g6764.t1		del	frameshift_variant	1	1	1	1
TP188858	-50000_to_-40000	g6764.t1		complex,snp	frameshift_variant&missense_variant	0	0	0	0
TP188858	-50000_to_-40000	g6764.t1		ins	frameshift_variant	0	0	0	0
TP188858	-50000_to_-40000	g6765.t1		snp	start_lost	1	1	1	1
TP188858	-50000_to_-40000	g6765.t1		snp	splice_acceptor_variant&intron_variant	1	1	1	1
TP188858	-50000_to_-40000	g6765.t1		del	frameshift_variant	1	1	1	1
TP188858	-50000_to_-40000	g6765.t1		ins	frameshift_variant	1	1	1	1
TP188858	-50000_to_-40000	g6765.t1		ins	frameshift_variant	1	1	1	1
TP188858	-50000_to_-40000	g6765.t1		del	frameshift_variant	1	1	1	1
TP188858	-50000_to_-40000	g6765.t1		del	frameshift_variant&splice_region_variant	1	1	1	0
TP188858	-40000_to_-30000
TP188858	-40000_to_-30000	g6766.t1	nematode cuticle collagen domain protein [Dictyocaulus viviparus]	complex,snp	splice_donor_variant&splice_region_variant&intron_variant	0.941176	0.333333	0.5	0.4
TP188858	-40000_to_-30000	g6766.t1	nematode cuticle collagen domain protein [Dictyocaulus viviparus]	snp	stop_gained	1	1	1	1
TP188858	-40000_to_-30000	g6766.t1	nematode cuticle collagen domain protein [Dictyocaulus viviparus]	complex,snp	splice_donor_variant&splice_region_variant&intron_variant	0.941176	0.333333	0.5	0.4
TP188858	-40000_to_-30000	g6766.t1	nematode cuticle collagen domain protein [Dictyocaulus viviparus]	snp	stop_gained	1	1	1	1
TP188858	-30000_to_-20000
TP188858	-30000_to_-20000	g6767.t1	Guanylate kinase domain containing protein [Haemonchus contortus]	del	frameshift_variant	1	0.9375	1	1
TP188858	-30000_to_-20000	g6767.t1	Guanylate kinase domain containing protein [Haemonchus contortus]	complex,snp,snp	stop_gained	1	1	1	0.714286
TP188858	-30000_to_-20000	g6767.t1	Guanylate kinase domain containing protein [Haemonchus contortus]	del	frameshift_variant	1	0.9375	1	1
TP188858	-30000_to_-20000	g6767.t1	Guanylate kinase domain containing protein [Haemonchus contortus]	complex,snp,snp	stop_gained	1	1	1	0.714286
TP188858	-20000_to_-10000
TP188858	-10000_to_0
TP188858	-10000_to_0	g6769.t1	Protein Y41D4B.24 [Haemonchus contortus]	ins	frameshift_variant	1	1	1	0
TP188858	-10000_to_0	g6769.t1	Protein Y41D4B.24 [Haemonchus contortus]	snp,snp	splice_donor_variant&intron_variant	1	1	1	0
TP188858	-10000_to_0	g6769.t1	Protein Y41D4B.24 [Haemonchus contortus]	ins	frameshift_variant	1	1	1	0
TP188858	-10000_to_0	g6769.t1	Protein Y41D4B.24 [Haemonchus contortus]	snp,snp	splice_donor_variant&intron_variant	1	1	1	0
TP188858	0_to_10000
TP188858	0_to_10000	g6770.t1		complex,complex,snp	start_lost	0.875	0.846154	0.87	1
TP188858	0_to_10000	g6770.t1		complex,ins,ins	frameshift_variant	0.683544	0.60274	0.466019	0.4
TP188858	0_to_10000	g6770.t1		complex,complex,ins	frameshift_variant&stop_gained	1	1	1	1
TP188858	0_to_10000	g6770.t1		snp	stop_gained	1	1	0.994898	1
TP188858	0_to_10000	g6770.t1		complex,complex,complex	stop_gained	1	0.929825	1	1
TP188858	0_to_10000	g6770.t1		del	frameshift_variant	1	1	1	1
TP188858	0_to_10000	g6770.t1		ins	frameshift_variant	0.966667	0.914894	0.956044	1
TP188858	0_to_10000	g6771.t1		snp	stop_lost&splice_region_variant	1	0.964286	1	1
TP188858	0_to_10000	g6771.t1		complex	frameshift_variant&missense_variant	1	0.969231	1	1
TP188858	0_to_10000	g6771.t1		mnp,snp	stop_gained	1	1	1	1
TP188858	0_to_10000	g6771.t1		del	frameshift_variant	1	1	1	1
TP188858	0_to_10000	g6771.t2		snp	splice_donor_variant&intron_variant	1	1	1	1
TP188858	0_to_10000	g6770.t1		complex,complex,snp	start_lost	0.875	0.846154	0.87	1
TP188858	0_to_10000	g6770.t1		complex,ins,ins	frameshift_variant	0.683544	0.60274	0.466019	0.4
TP188858	0_to_10000	g6770.t1		complex,complex,ins	frameshift_variant&stop_gained	1	1	1	1
TP188858	0_to_10000	g6770.t1		snp	stop_gained	1	1	0.994898	1
TP188858	0_to_10000	g6770.t1		complex,complex,complex	stop_gained	1	0.929825	1	1
TP188858	0_to_10000	g6770.t1		del	frameshift_variant	1	1	1	1
TP188858	0_to_10000	g6770.t1		ins	frameshift_variant	0.966667	0.914894	0.956044	1
TP188858	0_to_10000	g6771.t1		snp	stop_lost&splice_region_variant	1	0.964286	1	1
TP188858	0_to_10000	g6771.t1		complex	frameshift_variant&missense_variant	1	0.969231	1	1
TP188858	0_to_10000	g6771.t1		mnp,snp	stop_gained	1	1	1	1
TP188858	0_to_10000	g6771.t1		del	frameshift_variant	1	1	1	1
TP188858	0_to_10000	g6771.t2		snp	splice_donor_variant&intron_variant	1	1	1	1
TP188858	10000_to_20000
TP188858	10000_to_20000	g6772.t1		del,snp	frameshift_variant&stop_lost&splice_region_variant	1	1	1	1
TP188858	10000_to_20000	g6772.t1		mnp,snp	stop_gained	0.808511	0.590909	0.742857	0.333333
TP188858	10000_to_20000	g6772.t1		snp	splice_donor_variant&intron_variant	1	1	1	1
TP188858	10000_to_20000	g6772.t1		del	frameshift_variant	1	1	1	1
TP188858	10000_to_20000	g6772.t1		snp	splice_acceptor_variant&intron_variant	0.05	0.44	0.3125	0
TP188858	10000_to_20000	g6772.t1		ins,snp	frameshift_variant	0.533333	0.538462	0.75	0.5
TP188858	10000_to_20000	g6772.t1		complex,snp	start_lost&missense_variant	0.740741	0.714286	0.333333	0.6
TP188858	10000_to_20000	g6773.t1		complex	frameshift_variant&missense_variant	1	0.529412	0.541667	0
TP188858	10000_to_20000	g6773.t1		ins	frameshift_variant	1	1	1	0
TP188858	10000_to_20000	g6774.t2		complex,snp	splice_acceptor_variant&splice_region_variant&synonymous_variant&intron_variant	0.88	0.653846	0.666667	0
TP188858	10000_to_20000	g6774.t2		snp	splice_donor_variant&intron_variant	1	1	1	0
TP188858	10000_to_20000	g6774.t2		ins,snp	frameshift_variant	0.818182	0.4	0.705882	1
TP188858	10000_to_20000	g6774.t2		complex,complex,snp	start_lost	0.64	0.538462	0.555556	1
TP188858	10000_to_20000	g6772.t1		del,snp	frameshift_variant&stop_lost&splice_region_variant	1	1	1	1
TP188858	10000_to_20000	g6772.t1		mnp,snp	stop_gained	0.808511	0.590909	0.742857	0.333333
TP188858	10000_to_20000	g6772.t1		snp	splice_donor_variant&intron_variant	1	1	1	1
TP188858	10000_to_20000	g6772.t1		del	frameshift_variant	1	1	1	1
TP188858	10000_to_20000	g6772.t1		snp	splice_acceptor_variant&intron_variant	0.05	0.44	0.3125	0
TP188858	10000_to_20000	g6772.t1		ins,snp	frameshift_variant	0.533333	0.538462	0.75	0.5
TP188858	10000_to_20000	g6772.t1		complex,snp	start_lost&missense_variant	0.740741	0.714286	0.333333	0.6
TP188858	10000_to_20000	g6773.t1		complex	frameshift_variant&missense_variant	1	0.529412	0.541667	0
TP188858	10000_to_20000	g6773.t1		ins	frameshift_variant	1	1	1	0
TP188858	10000_to_20000	g6774.t2		complex,snp	splice_acceptor_variant&splice_region_variant&synonymous_variant&intron_variant	0.88	0.653846	0.666667	0
TP188858	10000_to_20000	g6774.t2		snp	splice_donor_variant&intron_variant	1	1	1	0
TP188858	10000_to_20000	g6774.t2		ins,snp	frameshift_variant	0.818182	0.4	0.705882	1
TP188858	10000_to_20000	g6774.t2		complex,complex,snp	start_lost	0.64	0.538462	0.555556	1
TP188858	20000_to_30000
TP188858	30000_to_40000
TP188858	40000_to_50000
TP	position	Gene	Info	Type	TypeExtended	IL4	KS2	ON1	ON34
TP226227	-50000_to_-40000
TP226227	-50000_to_-40000	g3340.t1		complex	splice_acceptor_variant&splice_region_variant&synonymous_variant&intron_variant	1	1	1	1
TP226227	-50000_to_-40000	g3341.t1		ins,ins,ins	stop_gained&inframe_insertion	0.3	0.785714	0.636364	0
TP226227	-50000_to_-40000	g3341.t1		complex,snp	stop_gained	1	1	1	0
TP226227	-50000_to_-40000	g3341.t1		complex	frameshift_variant&synonymous_variant	0	1	1	0
TP226227	-50000_to_-40000	g3341.t1		complex,complex,snp	splice_donor_variant&missense_variant&splice_region_variant&intron_variant	1	1	1	1
TP226227	-50000_to_-40000	g3341.t1		complex,complex,ins	frameshift_variant	0.166667	0.535714	0.47619	1
TP226227	-50000_to_-40000	g3341.t1		del,snp	frameshift_variant	1	1	1	1
TP226227	-50000_to_-40000	g3341.t1		ins	frameshift_variant	1	1	1	1
TP226227	-50000_to_-40000	g3341.t1		del	frameshift_variant	0.942857	1	1	1
TP226227	-50000_to_-40000	g3341.t1		complex	splice_donor_variant&missense_variant&splice_region_variant&intron_variant	1	1	1	0
TP226227	-50000_to_-40000	g3341.t1		complex,snp	stop_gained	0	0	0.0175439	0
TP226227	-50000_to_-40000	g3341.t1		mnp,snp	stop_gained	1	1	1	1
TP226227	-50000_to_-40000	g14540.t4	Voltage-dependent calcium channel type A subunit alpha-1 [Strongyloides ratti]	del	frameshift_variant	1	1	1	1
TP226227	-50000_to_-40000	g14540.t4	Voltage-dependent calcium channel type A subunit alpha-1 [Strongyloides ratti]	ins	splice_donor_variant&intron_variant	1	1	1	1
TP226227	-50000_to_-40000	g14540.t4	Voltage-dependent calcium channel type A subunit alpha-1 [Strongyloides ratti]	snp	stop_gained	1	0.909091	1	1
TP226227	-50000_to_-40000	g14540.t4	Voltage-dependent calcium channel type A subunit alpha-1 [Strongyloides ratti]	del	frameshift_variant	1	1	0.857143	1
TP226227	-50000_to_-40000	g14540.t4	Voltage-dependent calcium channel type A subunit alpha-1 [Strongyloides ratti]	snp	splice_donor_variant&intron_variant	1	1	1	0
TP226227	-50000_to_-40000	g14540.t4	Voltage-dependent calcium channel type A subunit alpha-1 [Strongyloides ratti]	del	frameshift_variant	1	1	1	1
TP226227	-50000_to_-40000	g14540.t4	Voltage-dependent calcium channel type A subunit alpha-1 [Strongyloides ratti]	ins	frameshift_variant	1	1	1	1
TP226227	-50000_to_-40000	g14540.t4	Voltage-dependent calcium channel type A subunit alpha-1 [Strongyloides ratti]	ins	frameshift_variant	1	1	1	1
TP226227	-50000_to_-40000	g14540.t4	Voltage-dependent calcium channel type A subunit alpha-1 [Strongyloides ratti]	snp	splice_acceptor_variant&intron_variant	1	1	1	1
TP226227	-50000_to_-40000	g14540.t4	Voltage-dependent calcium channel type A subunit alpha-1 [Strongyloides ratti]	snp	stop_gained	1	1	1	0
TP226227	-50000_to_-40000	g14540.t4	Voltage-dependent calcium channel type A subunit alpha-1 [Strongyloides ratti]	ins	frameshift_variant&stop_gained	1	1	1	1
TP226227	-50000_to_-40000	g14540.t4	Voltage-dependent calcium channel type A subunit alpha-1 [Strongyloides ratti]	ins	frameshift_variant	1	1	1	1
TP226227	-50000_to_-40000	g14540.t4	Voltage-dependent calcium channel type A subunit alpha-1 [Strongyloides ratti]	snp	stop_gained	1	0.964286	1	1
TP226227	-50000_to_-40000	g1969.t1	pao retrotransposon peptidase, partial [Wuchereria bancrofti]	ins	frameshift_variant	1	0	0	1
TP226227	-50000_to_-40000	g1969.t1	pao retrotransposon peptidase, partial [Wuchereria bancrofti]	del	start_lost&inframe_deletion	0	0	0	0
TP226227	-50000_to_-40000	g1970.t1	Plectin repeat and Calponin homology domain and Spectrin/alpha-actinin repeat-containing protein [Strongyloides ratti]	ins	frameshift_variant	0	1	0	0
TP226227	-40000_to_-30000
TP226227	-40000_to_-30000	g14540.t4	Voltage-dependent calcium channel type A subunit alpha-1 [Strongyloides ratti]	del	frameshift_variant	0.904762	1	1	1
TP226227	-40000_to_-30000	g14540.t4	Voltage-dependent calcium channel type A subunit alpha-1 [Strongyloides ratti]	snp	stop_gained	0.944444	1	1	1
TP226227	-40000_to_-30000	g14540.t4	Voltage-dependent calcium channel type A subunit alpha-1 [Strongyloides ratti]	complex,snp	splice_donor_variant&missense_variant&splice_region_variant&intron_variant	0	0	0	0
TP226227	-40000_to_-30000	g14541.t2	Ubiquinol-cytochrome-c reductase complex assembly factor 1 [Strongyloides ratti]	ins	frameshift_variant	1	0.943396	0.921875	1
TP226227	-40000_to_-30000	g14541.t2	Ubiquinol-cytochrome-c reductase complex assembly factor 1 [Strongyloides ratti]	ins	frameshift_variant	1	0.933333	0.929577	1
TP226227	-40000_to_-30000	g14541.t2	Ubiquinol-cytochrome-c reductase complex assembly factor 1 [Strongyloides ratti]	del	frameshift_variant	0.0625	0.359375	0.0921053	0
TP226227	-40000_to_-30000	g1971.t1	reverse transcriptase [Brugia malayi]	ins	frameshift_variant	0	0	0	0
TP226227	-40000_to_-30000	g1972.t1	Dynein heavy chain, cytoplasmic [Strongyloides ratti]	del	frameshift_variant	1	0.926829	1	0
TP226227	-40000_to_-30000	g1972.t1	Dynein heavy chain, cytoplasmic [Strongyloides ratti]	complex,snp,snp	frameshift_variant&splice_acceptor_variant&missense_variant&splice_region_variant&intron_variant	0.7	1	0.9375	0
TP226227	-40000_to_-30000	g1972.t1	Dynein heavy chain, cytoplasmic [Strongyloides ratti]	del	frameshift_variant	1	1	1	0
TP226227	-40000_to_-30000	g1972.t1	Dynein heavy chain, cytoplasmic [Strongyloides ratti]	snp	splice_donor_variant&intron_variant	0	1	0	0
TP226227	-30000_to_-20000
TP226227	-30000_to_-20000	g3342.t1		ins	frameshift_variant&splice_region_variant	0.685393	0.779221	0.592857	0.875
TP226227	-30000_to_-20000	g3342.t1		ins	frameshift_variant&splice_region_variant	0.978261	0.894737	0.946309	0.875
TP226227	-30000_to_-20000	g3342.t1		snp	stop_gained	1	1	1	1
TP226227	-30000_to_-20000	g3343.t1		ins	frameshift_variant	1	1	1	1
TP226227	-30000_to_-20000	g3343.t1		ins,ins	frameshift_variant	0.0204082	0	0.00854701	0
TP226227	-30000_to_-20000	g14541.t2	Ubiquinol-cytochrome-c reductase complex assembly factor 1 [Strongyloides ratti]	del	frameshift_variant	1	0.896552	0.962963	1
TP226227	-30000_to_-20000	g14541.t2	Ubiquinol-cytochrome-c reductase complex assembly factor 1 [Strongyloides ratti]	del	frameshift_variant&splice_region_variant	1	1	1	1
TP226227	-30000_to_-20000	g14541.t2	Ubiquinol-cytochrome-c reductase complex assembly factor 1 [Strongyloides ratti]	ins	frameshift_variant	1	1	1	1
TP226227	-30000_to_-20000	g14541.t2	Ubiquinol-cytochrome-c reductase complex assembly factor 1 [Strongyloides ratti]	del	frameshift_variant	1	1	1	0
TP226227	-30000_to_-20000	g14541.t2	Ubiquinol-cytochrome-c reductase complex assembly factor 1 [Strongyloides ratti]	del,snp	frameshift_variant&splice_acceptor_variant&splice_region_variant&intron_variant	0.955556	0.692308	0.803279	1
TP226227	-30000_to_-20000	g14541.t2	Ubiquinol-cytochrome-c reductase complex assembly factor 1 [Strongyloides ratti]	snp	stop_gained	1	1	1	1
TP226227	-30000_to_-20000	g14541.t2	Ubiquinol-cytochrome-c reductase complex assembly factor 1 [Strongyloides ratti]	complex,complex,snp	splice_donor_variant&intron_variant	1	1	1	1
TP226227	-30000_to_-20000	g14541.t2	Ubiquinol-cytochrome-c reductase complex assembly factor 1 [Strongyloides ratti]	del,snp,snp	frameshift_variant	0.909091	0.645161	1	1
TP226227	-30000_to_-20000	g14541.t2	Ubiquinol-cytochrome-c reductase complex assembly factor 1 [Strongyloides ratti]	complex,complex,snp	frameshift_variant&missense_variant	0.923077	0.65625	1	1
TP226227	-30000_to_-20000	g14541.t2	Ubiquinol-cytochrome-c reductase complex assembly factor 1 [Strongyloides ratti]	ins	frameshift_variant	0.928571	0.666667	1	1
TP226227	-30000_to_-20000	g14541.t2	Ubiquinol-cytochrome-c reductase complex assembly factor 1 [Strongyloides ratti]	del,ins	frameshift_variant	1	1	1	1
TP226227	-30000_to_-20000	g14542.t1		complex,snp,snp	frameshift_variant&missense_variant	1	1	1	1
TP226227	-30000_to_-20000	g14542.t1		complex,snp	frameshift_variant&synonymous_variant	0.92	0.818182	0.970588	1
TP226227	-30000_to_-20000	g14542.t1		complex,del,snp	frameshift_variant&missense_variant	0	0	0	0
TP226227	-30000_to_-20000	g14542.t1		complex,del,snp	frameshift_variant&missense_variant	0.911111	1	0.957447	1
TP226227	-30000_to_-20000	g14542.t1		complex	stop_gained&missense_variant&disruptive_inframe_insertion	1	1	1	1
TP226227	-30000_to_-20000	g14542.t1		complex,ins,snp	frameshift_variant&missense_variant	0.836364	0.8	0.9375	1
TP226227	-30000_to_-20000	g14542.t1		ins	frameshift_variant	1	1	1	1
TP226227	-30000_to_-20000	g14542.t1		complex,complex,complex	frameshift_variant&missense_variant	0.839286	0.813953	0.942308	1
TP226227	-30000_to_-20000	g14543.t1		snp	splice_acceptor_variant&intron_variant	1	0.944444	1	1
TP226227	-30000_to_-20000	g14543.t1		complex	frameshift_variant&splice_donor_variant&missense_variant&splice_region_variant&intron_variant	1	1	1	1
TP226227	-30000_to_-20000	g14543.t1		snp	stop_gained	1	1	1	1
TP226227	-30000_to_-20000	g14543.t1		ins,snp	frameshift_variant	0	0	0.0204082	0
TP226227	-30000_to_-20000	g14543.t1		ins	frameshift_variant	1	1	1	1
TP226227	-30000_to_-20000	g14543.t1		snp	splice_acceptor_variant&intron_variant	1	1	1	0
TP226227	-30000_to_-20000	g14543.t1		complex,snp	frameshift_variant&missense_variant	1	0.913043	0.888889	1
TP226227	-30000_to_-20000	g14543.t1		snp	stop_gained	1	0.833333	0.894737	1
TP226227	-30000_to_-20000	g1973.t1		del	frameshift_variant	0	1	0	0
TP226227	-30000_to_-20000	g1973.t1		ins	splice_donor_variant&intron_variant	0	0	0	0
TP226227	-30000_to_-20000	g1973.t1		snp	stop_gained	0	1	0	0
TP226227	-30000_to_-20000	g1973.t1		ins	frameshift_variant	0	0	0	0
TP226227	-30000_to_-20000	g1973.t1		del	frameshift_variant	0	1	0	0
TP226227	-30000_to_-20000	g1974.t1		ins	frameshift_variant	0	0	0	0
TP226227	-30000_to_-20000	g1974.t1		del	frameshift_variant	0	0	0	0
TP226227	-30000_to_-20000	g1976.t1	dynein heavy chain, region 2 [Oesophagostomum dentatum]	complex	frameshift_variant&missense_variant	0	1	0	0
TP226227	-20000_to_-10000
TP226227	-20000_to_-10000	g3344.t1		ins	frameshift_variant	1	1	1	1
TP226227	-20000_to_-10000	g3344.t1		complex,complex	frameshift_variant&missense_variant	1	1	1	1
TP226227	-20000_to_-10000	g3345.t1		snp	stop_gained	1	1	1	1
TP226227	-20000_to_-10000	g3345.t1		snp	stop_gained	1	1	1	1
TP226227	-20000_to_-10000	g3345.t1		del	frameshift_variant	0.828571	0.686275	0.881148	0.818182
TP226227	-20000_to_-10000	g3345.t1		complex	frameshift_variant&missense_variant	0	0	0.00653595	0
TP226227	-20000_to_-10000	g3345.t1		ins,ins	frameshift_variant	0.0240964	0.0869565	0.0368272	0.0434783
TP226227	-20000_to_-10000	g3345.t1		ins	frameshift_variant	0.0188679	0.0393701	0.00826446	0
TP226227	-20000_to_-10000	g3345.t1		snp	stop_gained	0.878947	0.748299	0.798206	0.545455
TP226227	-20000_to_-10000	g3345.t1		complex,del,snp	frameshift_variant	0.680473	0.625	0.530516	0.703704
TP226227	-20000_to_-10000	g3345.t1		del,snp	frameshift_variant	0.888889	0.756098	0.919668	0.883721
TP226227	-20000_to_-10000	g3345.t1		del	frameshift_variant	0.962617	0.931624	0.982143	0.977273
TP226227	-20000_to_-10000	g3345.t1		complex,complex,snp	stop_gained	0.565657	0.42735	0.542484	0.382353
TP226227	-20000_to_-10000	g14543.t1		complex	frameshift_variant&start_lost	1	1	1	1
TP226227	-20000_to_-10000	g14544.t1		ins	frameshift_variant	1	1	1	0
TP226227	-20000_to_-10000	g14545.t1	Glycoside hydrolase domain containing protein [Haemonchus contortus]	snp	start_lost	1	0.869565	1	1
TP226227	-20000_to_-10000	g14545.t1	Glycoside hydrolase domain containing protein [Haemonchus contortus]	del,snp	frameshift_variant	1	0.9	1	1
TP226227	-20000_to_-10000	g14545.t1	Glycoside hydrolase domain containing protein [Haemonchus contortus]	complex,del	splice_donor_variant&splice_region_variant&intron_variant	0	0	0	0
TP226227	-20000_to_-10000	g14545.t1	Glycoside hydrolase domain containing protein [Haemonchus contortus]	del	frameshift_variant	0.828571	0.821429	1	0
TP226227	-20000_to_-10000	g14545.t1	Glycoside hydrolase domain containing protein [Haemonchus contortus]	snp	stop_gained	0.916667	0.5	1	1
TP226227	-20000_to_-10000	g14545.t1	Glycoside hydrolase domain containing protein [Haemonchus contortus]	del,del	frameshift_variant	0.583333	0.5	0	0
TP226227	-20000_to_-10000	g14546.t1	Protein CBG10960 [Caenorhabditis briggsae]	complex,del	stop_lost&inframe_deletion&splice_region_variant	0	0.28125	0.166667	0
TP226227	-20000_to_-10000	g14546.t1	Protein CBG10960 [Caenorhabditis briggsae]	complex,del	frameshift_variant&missense_variant	0	0.227273	0.26087	0
TP226227	-20000_to_-10000	g14546.t1	Protein CBG10960 [Caenorhabditis briggsae]	ins	frameshift_variant	1	1	1	1
TP226227	-20000_to_-10000	g14546.t1	Protein CBG10960 [Caenorhabditis briggsae]	del	frameshift_variant	1	0.916667	1	1
TP226227	-20000_to_-10000	g14546.t1	Protein CBG10960 [Caenorhabditis briggsae]	del	frameshift_variant	0.941176	1	1	1
TP226227	-20000_to_-10000	g12204.t1		ins	frameshift_variant	1	0.888889	0.555556	0
TP226227	-20000_to_-10000	g12204.t1		ins	frameshift_variant	1	1	0.625	0
TP226227	-20000_to_-10000	g12204.t1		complex	frameshift_variant&missense_variant	1	1	0.625	0
TP226227	-20000_to_-10000	g12204.t1		complex,snp	splice_acceptor_variant&missense_variant&splice_region_variant&intron_variant	1	1	0.5	0
TP226227	-20000_to_-10000	g1976.t1	dynein heavy chain, region 2 [Oesophagostomum dentatum]	del	frameshift_variant	0	0	0	0
TP226227	-20000_to_-10000	g1976.t1	dynein heavy chain, region 2 [Oesophagostomum dentatum]	ins	frameshift_variant	0	0	0	0
TP226227	-20000_to_-10000	g1976.t1	dynein heavy chain, region 2 [Oesophagostomum dentatum]	complex,snp	stop_gained	0	0.25	0.36	0
TP226227	-20000_to_-10000	g1976.t1	dynein heavy chain, region 2 [Oesophagostomum dentatum]	snp	stop_gained	0	1	1	0
TP226227	-20000_to_-10000	g1976.t1	dynein heavy chain, region 2 [Oesophagostomum dentatum]	snp	stop_gained	0	0.8	0.666667	0
TP226227	-20000_to_-10000	g1976.t1	dynein heavy chain, region 2 [Oesophagostomum dentatum]	snp	splice_donor_variant&intron_variant	0	0.857143	0.6	0
TP226227	-20000_to_-10000	g1976.t1	dynein heavy chain, region 2 [Oesophagostomum dentatum]	snp	splice_donor_variant&intron_variant	1	1	1	1
TP226227	-20000_to_-10000	g1978.t1	dynein heavy chain, partial [Homo sapiens]	snp	splice_acceptor_variant&intron_variant	0	1	0.5	0
TP226227	-20000_to_-10000	g1979.t1	serine/threonine-protein kinase haspin [Haemonchus contortus]	snp	stop_gained	0	1	0	0
TP226227	-10000_to_0
TP226227	-10000_to_0	g1979.t1	serine/threonine-protein kinase haspin [Haemonchus contortus]	ins	frameshift_variant	0.6	0.6	0.333333	0
TP226227	-10000_to_0	g1979.t1	serine/threonine-protein kinase haspin [Haemonchus contortus]	snp	stop_gained&splice_region_variant	1	1	1	1
TP226227	0_to_10000
TP226227	0_to_10000	g3347.t1		ins	frameshift_variant&stop_gained	0.947368	1	1	1
TP226227	0_to_10000	g3347.t1		del	frameshift_variant	1	0.931034	1	1
TP226227	0_to_10000	g3347.t1		ins	frameshift_variant	0	0	0	0
TP226227	0_to_10000	g3347.t1		del	frameshift_variant	0.461538	0.666667	0.307692	1
TP226227	0_to_10000	g3347.t1		complex	frameshift_variant&missense_variant	0.76087	0.439024	0.536232	0.333333
TP226227	0_to_10000	g3347.t1		snp	stop_gained	1	1	1	0
TP226227	0_to_10000	g14547.t1		ins	frameshift_variant	0	0.5	0	0
TP226227	0_to_10000	g14547.t1		complex,del	splice_acceptor_variant&missense_variant&splice_region_variant&intron_variant	0.4	0.433333	0.185185	1
TP226227	0_to_10000	g14547.t1		ins	frameshift_variant	0	0	0	0
TP226227	0_to_10000	g14547.t1		del	frameshift_variant	1	1	1	1
TP226227	0_to_10000	g14547.t1		snp	stop_gained	1	1	1	1
TP226227	0_to_10000	g14547.t1		snp	splice_donor_variant&intron_variant	1	1	1	1
TP226227	0_to_10000	g14548.t1	Protein Y18H1A.10 [Haemonchus contortus]	complex	stop_gained&splice_donor_variant&splice_region_variant&intron_variant	1	1	1	1
TP226227	0_to_10000	g14548.t1	Protein Y18H1A.10 [Haemonchus contortus]	complex,snp,snp	frameshift_variant&missense_variant	0	0	0	0
TP226227	0_to_10000	g14548.t1	Protein Y18H1A.10 [Haemonchus contortus]	snp	stop_gained	1	1	1	1
TP226227	0_to_10000	g14548.t1	Protein Y18H1A.10 [Haemonchus contortus]	complex,del	frameshift_variant&missense_variant	1	1	1	1
TP226227	0_to_10000	g14548.t1	Protein Y18H1A.10 [Haemonchus contortus]	complex,complex	frameshift_variant&missense_variant	0	0	0	0
TP226227	0_to_10000	g14548.t1	Protein Y18H1A.10 [Haemonchus contortus]	ins	frameshift_variant	0	0	0.0833333	0
TP226227	0_to_10000	g14548.t1	Protein Y18H1A.10 [Haemonchus contortus]	snp	stop_gained	1	1	1	1
TP226227	0_to_10000	g14548.t1	Protein Y18H1A.10 [Haemonchus contortus]	ins,snp	frameshift_variant	0	0	0	0
TP226227	0_to_10000	g14548.t1	Protein Y18H1A.10 [Haemonchus contortus]	del,snp,snp	frameshift_variant	0.0754717	0.0866142	0.034965	0.333333
TP226227	0_to_10000	g14548.t1	Protein Y18H1A.10 [Haemonchus contortus]	del,snp	frameshift_variant	0.256281	0.365591	0.134831	0.5
TP226227	0_to_10000	g14548.t1	Protein Y18H1A.10 [Haemonchus contortus]	snp,snp,snp	stop_gained	0.937888	0.863014	0.944099	1
TP226227	0_to_10000	g14548.t1	Protein Y18H1A.10 [Haemonchus contortus]	ins,ins	frameshift_variant&splice_region_variant	1	1	1	1
TP226227	0_to_10000	g14548.t1	Protein Y18H1A.10 [Haemonchus contortus]	snp	splice_acceptor_variant&intron_variant	1	1	0.5	1
TP226227	0_to_10000	g14548.t1	Protein Y18H1A.10 [Haemonchus contortus]	complex	frameshift_variant&splice_region_variant&synonymous_variant	1	0.888889	1	0
TP226227	0_to_10000	g14548.t1	Protein Y18H1A.10 [Haemonchus contortus]	complex	splice_acceptor_variant&splice_region_variant&intron_variant	1	1	1	0
TP226227	0_to_10000	g12205.t1	Kazal domain and Organic anion transporter polypeptide OATP family and Major facilitator superfamily domain, general substrate transporter-containing protein [Strongyloides ratti]	complex,complex,complex	frameshift_variant&stop_lost&splice_region_variant	0.853659	0.785714	0.5	0
TP226227	0_to_10000	g12205.t1	Kazal domain and Organic anion transporter polypeptide OATP family and Major facilitator superfamily domain, general substrate transporter-containing protein [Strongyloides ratti]	del	frameshift_variant&splice_acceptor_variant&splice_region_variant&intron_variant	0.694915	0.628571	0.555556	0
TP226227	0_to_10000	g12206.t1	Protein Y18H1A.10 [Haemonchus contortus]	ins	frameshift_variant	1	1	0.978261	0
TP226227	0_to_10000	g12206.t1	Protein Y18H1A.10 [Haemonchus contortus]	complex,ins	frameshift_variant	0.532258	0.666667	0.55814	0
TP226227	0_to_10000	g12206.t1	Protein Y18H1A.10 [Haemonchus contortus]	complex	frameshift_variant&missense_variant	1	1	0.97619	0
TP226227	0_to_10000	g12206.t1	Protein Y18H1A.10 [Haemonchus contortus]	complex	frameshift_variant&missense_variant	1	1	0.97619	0
TP226227	0_to_10000	g12206.t1	Protein Y18H1A.10 [Haemonchus contortus]	complex,complex,complex	frameshift_variant&missense_variant	0.382022	0.489362	0.315068	0.153846
TP226227	10000_to_20000
TP226227	10000_to_20000	g3347.t1		del	frameshift_variant	1	1	1	1
TP226227	10000_to_20000	g3348.t1		snp	splice_donor_variant&intron_variant	1	0.935484	1	1
TP226227	10000_to_20000	g3348.t1		snp	stop_gained	1	1	1	1
TP226227	10000_to_20000	g12207.t1		ins	frameshift_variant	1	1	1	0
TP226227	10000_to_20000	g12207.t1		snp	stop_gained	1	1	1	1
TP226227	10000_to_20000	g12207.t1		ins,ins	frameshift_variant	1	1	1	1
TP226227	10000_to_20000	g12207.t1		ins,snp	frameshift_variant	1	1	1	1
TP226227	10000_to_20000	g12207.t1		ins,snp	frameshift_variant&splice_region_variant	1	1	1	1
TP226227	10000_to_20000	g1982.t1	85/88 kDa calcium-independent phospholipase A2 [Toxocara canis]	snp	stop_gained	0.75	0.769231	0.333333	0.333333
TP226227	10000_to_20000	g1982.t1	85/88 kDa calcium-independent phospholipase A2 [Toxocara canis]	del	frameshift_variant	0.969697	0.95	0.96	1
TP226227	10000_to_20000	g1983.t1	solute carrier family 25 member 36 [Ascaris suum]	del	frameshift_variant	1	1	1	1
TP226227	10000_to_20000	g1983.t1	solute carrier family 25 member 36 [Ascaris suum]	snp	stop_gained&splice_region_variant	0	0.142857	0	1
TP226227	10000_to_20000	g1984.t1	RNA exonuclease 1 -like protein [Toxocara canis]	complex,ins	stop_gained&missense_variant&inframe_insertion	0.0588235	0	0	0
TP226227	10000_to_20000	g1984.t1	RNA exonuclease 1 -like protein [Toxocara canis]	snp	stop_gained	0.952381	1	0.962264	1
TP226227	10000_to_20000	g1984.t1	RNA exonuclease 1 -like protein [Toxocara canis]	ins	frameshift_variant	1	1	1	1
TP226227	20000_to_30000
TP226227	20000_to_30000	g12208.t1		del	splice_acceptor_variant&inframe_deletion&splice_region_variant&intron_variant	1	1	1	1
TP226227	20000_to_30000	g12208.t1		del	frameshift_variant&splice_region_variant	1	1	1	1
TP226227	20000_to_30000	g12208.t1		complex	frameshift_variant&missense_variant	1	1	1	1
TP226227	20000_to_30000	g12208.t1		complex	frameshift_variant&missense_variant	1	1	1	1
TP226227	20000_to_30000	g12208.t1		del	frameshift_variant	1	1	1	1
TP226227	20000_to_30000	g12208.t1		complex,del	frameshift_variant&missense_variant	1	1	1	1
TP226227	20000_to_30000	g12209.t1		mnp	splice_donor_variant&missense_variant&splice_region_variant&intron_variant	1	1	1	1
TP226227	20000_to_30000	g1984.t1	RNA exonuclease 1 -like protein [Toxocara canis]	ins	frameshift_variant	1	1	1	1
TP226227	20000_to_30000	g1984.t1	RNA exonuclease 1 -like protein [Toxocara canis]	ins,snp	frameshift_variant&stop_gained	0.703704	0.764706	0.782609	1
TP226227	20000_to_30000	g1984.t1	RNA exonuclease 1 -like protein [Toxocara canis]	complex,snp	stop_gained	0.703704	0.771429	0.806452	1
TP226227	20000_to_30000	g1984.t1	RNA exonuclease 1 -like protein [Toxocara canis]	del	frameshift_variant	1	1	1	0
TP226227	20000_to_30000	g1984.t1	RNA exonuclease 1 -like protein [Toxocara canis]	del	frameshift_variant	1	1	1	0
TP226227	20000_to_30000	g1984.t1	RNA exonuclease 1 -like protein [Toxocara canis]	snp	splice_donor_variant&intron_variant	1	1	1	1
TP226227	20000_to_30000	g1984.t1	RNA exonuclease 1 -like protein [Toxocara canis]	del	frameshift_variant	1	1	1	1
TP226227	20000_to_30000	g1984.t1	RNA exonuclease 1 -like protein [Toxocara canis]	del	frameshift_variant	0.95	1	1	1
TP226227	20000_to_30000	g1984.t1	RNA exonuclease 1 -like protein [Toxocara canis]	ins,ins	splice_donor_variant&intron_variant	0	0.307692	0	0
TP226227	20000_to_30000	g1984.t1	RNA exonuclease 1 -like protein [Toxocara canis]	del	frameshift_variant	0.931034	1	1	1
TP226227	20000_to_30000	g1984.t1	RNA exonuclease 1 -like protein [Toxocara canis]	del	splice_donor_variant&splice_region_variant&intron_variant	1	1	1	0
TP226227	30000_to_40000
TP226227	30000_to_40000	g1984.t1	RNA exonuclease 1 -like protein [Toxocara canis]	snp	stop_gained	0.478261	0.294118	0.26087	0
TP226227	30000_to_40000	g1984.t1	RNA exonuclease 1 -like protein [Toxocara canis]	complex	stop_gained	0.478261	0.368421	0.272727	0
TP226227	30000_to_40000	g1984.t1	RNA exonuclease 1 -like protein [Toxocara canis]	del,snp	frameshift_variant	1	1	1	1
TP226227	30000_to_40000	g1984.t1	RNA exonuclease 1 -like protein [Toxocara canis]	snp	splice_donor_variant&intron_variant	1	1	1	1
TP226227	30000_to_40000	g1984.t1	RNA exonuclease 1 -like protein [Toxocara canis]	ins	frameshift_variant	1	1	1	1
TP226227	40000_to_50000
TP226227	40000_to_50000	g1985.t1	Phosphoglucomutase-1 [Toxocara canis]	snp	splice_acceptor_variant&intron_variant	1	1	1	1
TP226227	40000_to_50000	g1985.t1	Phosphoglucomutase-1 [Toxocara canis]	del,snp	frameshift_variant&splice_region_variant	1	1	0.944444	0
TP226227	40000_to_50000	g1985.t1	Phosphoglucomutase-1 [Toxocara canis]	del,mnp	splice_donor_variant&intron_variant	1	1	1	0
TP226227	40000_to_50000	g1985.t1	Phosphoglucomutase-1 [Toxocara canis]	del	frameshift_variant	1	1	1	0
TP226227	40000_to_50000	g1985.t1	Phosphoglucomutase-1 [Toxocara canis]	del,del,snp	frameshift_variant	1	1	1	1
TP226227	40000_to_50000	g1985.t1	Phosphoglucomutase-1 [Toxocara canis]	complex	splice_donor_variant&missense_variant&splice_region_variant&intron_variant	0.518519	0.75	0.666667	1
TP226227	40000_to_50000	g1985.t1	Phosphoglucomutase-1 [Toxocara canis]	del,snp,snp	frameshift_variant	1	1	1	0
TP226227	40000_to_50000	g1985.t1	Phosphoglucomutase-1 [Toxocara canis]	del	frameshift_variant	1	1	1	1
TP226227	40000_to_50000	g1985.t1	Phosphoglucomutase-1 [Toxocara canis]	complex,complex,snp	frameshift_variant&missense_variant	0.455696	0.815789	0.964706	0.666667
TP226227	40000_to_50000	g1985.t1	Phosphoglucomutase-1 [Toxocara canis]	snp	stop_gained	1	1	1	1
TP226227	40000_to_50000	g1985.t1	Phosphoglucomutase-1 [Toxocara canis]	snp	splice_acceptor_variant&intron_variant	1	1	1	1
TP226227	40000_to_50000	g1985.t1	Phosphoglucomutase-1 [Toxocara canis]	del	frameshift_variant&splice_region_variant	1	1	1	1
TP226227	40000_to_50000	g1985.t1	Phosphoglucomutase-1 [Toxocara canis]	complex,complex	start_lost&missense_variant	0.615385	0.548387	0.844828	1
TP	position	Gene	Info	Type	TypeExtended	IL4	KS2	ON1	ON34
TP252086	-50000_to_-40000
TP252086	-50000_to_-40000	g18808.t1	Calpain-5 [Toxocara canis]	snp	stop_gained	1	1	0.964286	1
TP252086	-50000_to_-40000	g18809.t1	Innexin family-containing protein [Strongyloides ratti]	snp	stop_gained	1	1	1	0
TP252086	-50000_to_-40000	g18809.t1	Innexin family-containing protein [Strongyloides ratti]	del	frameshift_variant	1	1	0.944444	0
TP252086	-40000_to_-30000
TP252086	-40000_to_-30000	g18810.t1	Ammonium transporter family and Ammonium transporter AmtB-like domain-containing protein [Strongyloides ratti]	del	frameshift_variant	1	1	1	1
TP252086	-40000_to_-30000	g18811.t1	Innexin family-containing protein [Strongyloides ratti]	del	frameshift_variant&stop_lost&splice_region_variant	0	0	0	0
TP252086	-40000_to_-30000	g18812.t1	Bestrophin/UPF0187 family-containing protein [Strongyloides ratti]	complex	frameshift_variant&missense_variant	0	0	0	0
TP252086	-40000_to_-30000	g18812.t1	Bestrophin/UPF0187 family-containing protein [Strongyloides ratti]	del	frameshift_variant	1	0.777778	1	1
TP252086	-40000_to_-30000	g18813.t1	Bestrophin/UPF0187 family-containing protein [Strongyloides ratti]	ins	frameshift_variant&start_lost	1	1	1	1
TP252086	-40000_to_-30000	g18813.t1	Bestrophin/UPF0187 family-containing protein [Strongyloides ratti]	del	frameshift_variant	1	1	1	1
TP252086	-40000_to_-30000	g18813.t1	Bestrophin/UPF0187 family-containing protein [Strongyloides ratti]	ins	frameshift_variant	0.0263158	0	0.380952	1
TP252086	-30000_to_-20000
TP252086	-30000_to_-20000	g18814.t1		del,snp	frameshift_variant	1	1	1	1
TP252086	-30000_to_-20000	g18814.t1		snp	stop_gained	1	1	1	1
TP252086	-30000_to_-20000	g18814.t1		snp	stop_gained	1	1	1	1
TP252086	-30000_to_-20000	g18814.t1		ins	frameshift_variant	1	1	1	1
TP252086	-30000_to_-20000	g18815.t2		del,snp	frameshift_variant&stop_lost&splice_region_variant	1	1	1	1
TP252086	-30000_to_-20000	g18815.t2		del	frameshift_variant	1	1	1	1
TP252086	-30000_to_-20000	g18815.t2		ins,snp	frameshift_variant	0	0	0	0
TP252086	-20000_to_-10000
TP252086	-20000_to_-10000	g18817.t1		ins	frameshift_variant	1	1	0.975	1
TP252086	-20000_to_-10000	g18818.t1	transporter, major facilitator family protein [Necator americanus]	ins,ins	frameshift_variant	0	0	0.008	0
TP252086	-20000_to_-10000	g18818.t1	transporter, major facilitator family protein [Necator americanus]	ins	frameshift_variant	0.941176	1	1	1
TP252086	-20000_to_-10000	g18819.t1	collagen triple helix repeat protein [Necator americanus]	ins	frameshift_variant&splice_region_variant	0	0	0.421053	1
TP252086	-20000_to_-10000	g18819.t1	collagen triple helix repeat protein [Necator americanus]	del,ins	frameshift_variant	0.0625	0	0	0
TP252086	-20000_to_-10000	g18819.t1	collagen triple helix repeat protein [Necator americanus]	ins	frameshift_variant	0	0.027027	0.365854	1
TP252086	-20000_to_-10000	g18819.t1	collagen triple helix repeat protein [Necator americanus]	ins,ins	frameshift_variant	0	0	0	0
TP252086	-20000_to_-10000	g18819.t1	collagen triple helix repeat protein [Necator americanus]	del	frameshift_variant	1	1	1	1
TP252086	-20000_to_-10000	g18819.t1	collagen triple helix repeat protein [Necator americanus]	ins	frameshift_variant	0	0	0.327273	1
TP252086	-20000_to_-10000	g18819.t1	collagen triple helix repeat protein [Necator americanus]	del	frameshift_variant	1	1	1	1
TP252086	-20000_to_-10000	g18820.t1	esophageal gland-localized secretory protein 11 [Heterodera glycines]	ins	frameshift_variant	1	1	1	1
TP252086	-20000_to_-10000	g18820.t1	esophageal gland-localized secretory protein 11 [Heterodera glycines]	ins	frameshift_variant	1	1	1	1
TP252086	-10000_to_0
TP252086	-10000_to_0	g18820.t1	esophageal gland-localized secretory protein 11 [Heterodera glycines]	ins,ins	frameshift_variant	0.012987	0	0.00925926	0
TP252086	-10000_to_0	g18821.t1	Poly(A) polymerase and Nucleotidyltransferase domain containing protein [Haemonchus contortus]	del	frameshift_variant	1	0.666667	1	0
TP252086	-10000_to_0	g18821.t1	Poly(A) polymerase and Nucleotidyltransferase domain containing protein [Haemonchus contortus]	del	frameshift_variant	1	1	0.714286	0
TP252086	-10000_to_0	g18821.t1	Poly(A) polymerase and Nucleotidyltransferase domain containing protein [Haemonchus contortus]	complex,complex	frameshift_variant&missense_variant	0.114286	0.208333	0.388889	1
TP252086	-10000_to_0	g18821.t1	Poly(A) polymerase and Nucleotidyltransferase domain containing protein [Haemonchus contortus]	del	frameshift_variant	1	1	1	1
TP252086	-10000_to_0	g18821.t1	Poly(A) polymerase and Nucleotidyltransferase domain containing protein [Haemonchus contortus]	snp	stop_gained	1	1	0.99187	1
TP252086	-10000_to_0	g18821.t1	Poly(A) polymerase and Nucleotidyltransferase domain containing protein [Haemonchus contortus]	snp	splice_donor_variant&intron_variant	1	1	1	1
TP252086	0_to_10000
TP252086	0_to_10000	g18821.t1	Poly(A) polymerase and Nucleotidyltransferase domain containing protein [Haemonchus contortus]	snp	stop_gained	1	1	0.993789	1
TP252086	0_to_10000	g18821.t1	Poly(A) polymerase and Nucleotidyltransferase domain containing protein [Haemonchus contortus]	complex	stop_gained	1	1	1	1
TP252086	0_to_10000	g18821.t1	Poly(A) polymerase and Nucleotidyltransferase domain containing protein [Haemonchus contortus]	ins	frameshift_variant	1	1	1	1
TP252086	0_to_10000	g18821.t1	Poly(A) polymerase and Nucleotidyltransferase domain containing protein [Haemonchus contortus]	complex,snp	frameshift_variant&stop_gained&splice_donor_variant&missense_variant&splice_region_variant&intron_variant	1	1	1	1
TP252086	10000_to_20000
TP252086	10000_to_20000	g18822.t1		snp	stop_gained	1	1	1	1
TP252086	10000_to_20000	g18822.t1		snp	stop_gained	1	1	1	1
TP252086	10000_to_20000	g18822.t1		del	frameshift_variant	1	1	1	1
TP252086	10000_to_20000	g18822.t1		del,snp	frameshift_variant&splice_region_variant	1	1	1	1
TP252086	10000_to_20000	g18824.t1	Nidogen-2 [Toxocara canis]	del	frameshift_variant	1	1	1	1
TP252086	10000_to_20000	g18824.t1	Nidogen-2 [Toxocara canis]	del	frameshift_variant	1	1	1	1
TP252086	10000_to_20000	g18824.t1	Nidogen-2 [Toxocara canis]	del	frameshift_variant	1	1	1	1
TP252086	10000_to_20000	g18824.t1	Nidogen-2 [Toxocara canis]	complex	splice_donor_variant&splice_region_variant&intron_variant	1	1	1	1
TP252086	10000_to_20000	g18824.t1	Nidogen-2 [Toxocara canis]	snp	stop_gained	0.944444	1	1	1
TP252086	10000_to_20000	g18824.t1	Nidogen-2 [Toxocara canis]	del	frameshift_variant	0.92	1	1	1
TP252086	20000_to_30000
TP252086	20000_to_30000	g18824.t1	Nidogen-2 [Toxocara canis]	del	frameshift_variant	1	1	1	1
TP252086	20000_to_30000	g18824.t1	Nidogen-2 [Toxocara canis]	snp	splice_donor_variant&intron_variant	1	1	1	1
TP252086	20000_to_30000	g18824.t1	Nidogen-2 [Toxocara canis]	complex	splice_acceptor_variant&splice_region_variant&synonymous_variant&intron_variant	1	1	1	1
TP252086	20000_to_30000	g18824.t1	Nidogen-2 [Toxocara canis]	del	frameshift_variant	1	1	1	0.777778
TP252086	20000_to_30000	g18824.t1	Nidogen-2 [Toxocara canis]	ins,ins	frameshift_variant	0	0	0	0
TP252086	20000_to_30000	g18824.t1	Nidogen-2 [Toxocara canis]	del	frameshift_variant	0.944444	1	1	0
TP252086	20000_to_30000	g18824.t1	Nidogen-2 [Toxocara canis]	ins,ins,snp	frameshift_variant	0	0	0	0
TP252086	20000_to_30000	g18825.t1	mtN3/saliva family protein [Oesophagostomum dentatum]	del,snp	frameshift_variant	1	1	1	1
TP252086	20000_to_30000	g18825.t1	mtN3/saliva family protein [Oesophagostomum dentatum]	complex	splice_acceptor_variant&splice_region_variant&intron_variant	1	0.946667	1	1
TP252086	20000_to_30000	g18825.t1	mtN3/saliva family protein [Oesophagostomum dentatum]	del,snp	frameshift_variant	1	0.9	1	1
TP252086	20000_to_30000	g18826.t1		del	frameshift_variant	1	1	1	1
TP252086	30000_to_40000
TP252086	30000_to_40000	g18828.t1		snp	stop_lost&splice_region_variant	1	1	1	1
TP252086	30000_to_40000	g18828.t1		snp	stop_gained	1	1	1	1
TP252086	30000_to_40000	g18828.t1		ins,snp	frameshift_variant	1	0.826087	1	1
TP252086	30000_to_40000	g18829.t3	ER to Golgi vesicle transport protein, putative [Haemonchus contortus]	del	frameshift_variant	1	1	1	1
TP252086	30000_to_40000	g18829.t3	ER to Golgi vesicle transport protein, putative [Haemonchus contortus]	del	frameshift_variant	0.92	1	1	1
TP252086	30000_to_40000	g18829.t3	ER to Golgi vesicle transport protein, putative [Haemonchus contortus]	complex,del	frameshift_variant	1	1	1	1
TP252086	30000_to_40000	g18829.t3	ER to Golgi vesicle transport protein, putative [Haemonchus contortus]	del	frameshift_variant	0.947368	1	1	0
TP252086	30000_to_40000	g18829.t3	ER to Golgi vesicle transport protein, putative [Haemonchus contortus]	snp	splice_donor_variant&intron_variant	1	1	1	1
TP252086	30000_to_40000	g18829.t3	ER to Golgi vesicle transport protein, putative [Haemonchus contortus]	ins	frameshift_variant	1	1	1	1
TP252086	30000_to_40000	g18829.t3	ER to Golgi vesicle transport protein, putative [Haemonchus contortus]	del	frameshift_variant	1	1	0.942857	1
TP252086	30000_to_40000	g18829.t3	ER to Golgi vesicle transport protein, putative [Haemonchus contortus]	snp	splice_donor_variant&intron_variant	1	1	1	1
TP252086	30000_to_40000	g18830.t1		ins	frameshift_variant	0	0.666667	0	0
TP252086	30000_to_40000	g18830.t1		del	frameshift_variant	0	0	0	0
TP252086	30000_to_40000	g18830.t1		del,snp	frameshift_variant	1	1	0.904762	0.818182
TP252086	30000_to_40000	g18830.t1		ins	frameshift_variant	0.882353	1	1	1
TP252086	40000_to_50000
TP252086	40000_to_50000	g18830.t1		del	frameshift_variant	1	1	1	1
TP252086	40000_to_50000	g18831.t1		complex	stop_lost&inframe_deletion&splice_region_variant&synonymous_variant	0	0	0	0
TP252086	40000_to_50000	g18831.t1		snp	splice_donor_variant&intron_variant	0.733333	0.867925	0.90583	1
TP252086	40000_to_50000	g18831.t1		ins	frameshift_variant	1	1	1	1
TP252086	40000_to_50000	g18831.t1		del	frameshift_variant	1	1	1	1
TP252086	40000_to_50000	g18831.t1		complex,ins	frameshift_variant&missense_variant	1	1	1	1
TP252086	40000_to_50000	g18831.t1		snp	splice_donor_variant&intron_variant	1	1	1	1
TP252086	40000_to_50000	g18831.t1		del	frameshift_variant	1	1	1	1
TP252086	40000_to_50000	g18831.t1		snp	stop_gained	0.0819672	0.410256	0.542254	1
TP252086	40000_to_50000	g18831.t1		del,ins,ins	splice_donor_variant&intron_variant	0	0.212121	0.314607	1
TP252086	40000_to_50000	g18832.t1	Ion transport 2 domain containing protein [Haemonchus contortus]	del	frameshift_variant	1	1	1	0.888889
TP252086	40000_to_50000	g18832.t1	Ion transport 2 domain containing protein [Haemonchus contortus]	snp	splice_donor_variant&intron_variant	1	1	1	1
TP252086	40000_to_50000	g18833.t1	Heat Shock Protein [Caenorhabditis elegans]	ins	frameshift_variant	1	1	1	1
TP	position	Gene	Info	Type	TypeExtended	IL4	KS2	ON1	ON34
TP324827	-50000_to_-40000
TP324827	-50000_to_-40000	g2716.t1		del	frameshift_variant	1	0.868421	0.921875	1
TP324827	-50000_to_-40000	g2716.t1		snp	stop_gained	1	1	1	1
TP324827	-50000_to_-40000	g2716.t1		complex	splice_donor_variant&missense_variant&splice_region_variant&intron_variant	1	1	1	0
TP324827	-50000_to_-40000	g2716.t1		ins	frameshift_variant	0.0952381	0.2	0.0384615	0.2
TP324827	-50000_to_-40000	g2716.t1		ins	frameshift_variant	1	1	1	1
TP324827	-50000_to_-40000	g2717.t1		snp	start_lost	1	0.9375	1	0.4
TP324827	-40000_to_-30000
TP324827	-40000_to_-30000	g9313.t1	laminin EGF-like protein [Dictyocaulus viviparus]	del	frameshift_variant	1	0.947368	1	1
TP324827	-40000_to_-30000	g2718.t1		del	frameshift_variant	0.864865	0.87931	0.86747	1
TP324827	-40000_to_-30000	g2718.t1		del	frameshift_variant	0.927083	0.916667	0.847368	0.833333
TP324827	-40000_to_-30000	g2718.t1		snp	stop_gained	0.951807	0.923077	0.85906	0.666667
TP324827	-30000_to_-20000
TP324827	-30000_to_-20000	g9314.t2	zinc finger protein [Loa loa]	snp	splice_donor_variant&intron_variant	0.354839	0.586207	0.8	0
TP324827	-30000_to_-20000	g9314.t2	zinc finger protein [Loa loa]	del,snp	frameshift_variant	0.829787	0.8	1	0.777778
TP324827	-30000_to_-20000	g9314.t2	zinc finger protein [Loa loa]	complex	frameshift_variant&synonymous_variant	0.926829	0.933333	1	0.857143
TP324827	-30000_to_-20000	g9314.t2	zinc finger protein [Loa loa]	snp	splice_acceptor_variant&intron_variant	1	1	1	1
TP324827	-30000_to_-20000	g9314.t2	zinc finger protein [Loa loa]	del	frameshift_variant	1	1	1	1
TP324827	-30000_to_-20000	g2719.t1	Organic cation transporter-like protein [Toxocara canis]	del	frameshift_variant	0.888889	1	1	0
TP324827	-30000_to_-20000	g2719.t1	Organic cation transporter-like protein [Toxocara canis]	del	frameshift_variant	1	1	1	0
TP324827	-20000_to_-10000
TP324827	-20000_to_-10000	g9314.t2	zinc finger protein [Loa loa]	del	frameshift_variant	1	1	1	1
TP324827	-20000_to_-10000	g9314.t2	zinc finger protein [Loa loa]	snp	stop_gained	1	1	1	1
TP324827	-20000_to_-10000	g2719.t1	Organic cation transporter-like protein [Toxocara canis]	snp	splice_donor_variant&intron_variant	0.875	1	1	1
TP324827	-10000_to_0
TP324827	-10000_to_0	g2720.t1		complex,del,del	frameshift_variant&stop_lost&splice_region_variant	0.139535	0.285714	0.190184	0.142857
TP324827	-10000_to_0	g2720.t1		complex,snp	stop_gained	0.940741	0.89404	0.928302	1
TP324827	-10000_to_0	g2720.t1		snp	stop_gained	0.939394	0.913043	0.910394	1
TP324827	-10000_to_0	g2720.t1		del	frameshift_variant	0.964029	0.986667	0.986014	1
TP324827	-10000_to_0	g2720.t1		del,snp,snp	frameshift_variant	0.893617	0.90604	0.966667	1
TP324827	-10000_to_0	g2720.t1		complex	frameshift_variant&synonymous_variant	0.963303	0.937008	0.93617	0.888889
TP324827	-10000_to_0	g2720.t1		snp	stop_gained	0.841121	0.952756	0.93662	1
TP324827	-10000_to_0	g2720.t1		del,snp	frameshift_variant	0.77027	0.788732	0.88189	1
TP324827	-10000_to_0	g2720.t1		snp	start_lost	1	1	1	1
TP324827	0_to_10000
TP324827	0_to_10000	g9315.t1		del	frameshift_variant	0.615385	0.677419	0.636364	1
TP324827	0_to_10000	g2721.t1	phosphatidylinositol n-acetylglucosaminyltransferase subunit a [Ascaris suum]	del	frameshift_variant&start_lost	1	1	1	0
TP324827	0_to_10000	g2721.t1	phosphatidylinositol n-acetylglucosaminyltransferase subunit a [Ascaris suum]	complex,complex,snp	frameshift_variant&missense_variant	0.629032	0.461538	0.455696	0.333333
TP324827	0_to_10000	g2721.t1	phosphatidylinositol n-acetylglucosaminyltransferase subunit a [Ascaris suum]	del,snp	frameshift_variant	0.642857	0.508475	0.459016	0.5
TP324827	0_to_10000	g2721.t1	phosphatidylinositol n-acetylglucosaminyltransferase subunit a [Ascaris suum]	complex,snp	splice_donor_variant&splice_region_variant&intron_variant	0.309524	0.672414	0.258621	0.611111
TP324827	0_to_10000	g2721.t1	phosphatidylinositol n-acetylglucosaminyltransferase subunit a [Ascaris suum]	ins,snp,snp	frameshift_variant	0.625	0.481481	0.695652	0.272727
TP324827	0_to_10000	g2721.t1	phosphatidylinositol n-acetylglucosaminyltransferase subunit a [Ascaris suum]	del,snp	frameshift_variant	0.798319	0.862069	0.874251	0.818182
TP324827	0_to_10000	g2721.t1	phosphatidylinositol n-acetylglucosaminyltransferase subunit a [Ascaris suum]	del	frameshift_variant	1	0.947368	1	1
TP324827	0_to_10000	g3351.t1		ins	frameshift_variant	0	0.333333	0.25	0
TP324827	0_to_10000	g3351.t1		ins	frameshift_variant	0	0.142857	0.2	0
TP324827	0_to_10000	g3351.t1		ins	frameshift_variant	0	0.153846	0.176471	0
TP324827	0_to_10000	g3351.t1		ins	frameshift_variant	0	0.25	0.125	0
TP324827	0_to_10000	g3351.t1		complex	start_lost	0	0.4	0.162162	0
TP324827	0_to_10000	g3352.t2	Chloride channel protein 1 [Toxocara canis]	del	frameshift_variant	1	0.823529	1	1
TP324827	0_to_10000	g3352.t2	Chloride channel protein 1 [Toxocara canis]	complex,complex	stop_gained	1	0.952381	1	1
TP324827	0_to_10000	g3352.t2	Chloride channel protein 1 [Toxocara canis]	complex,snp,snp	frameshift_variant&missense_variant	0.0277778	0.1875	0.12844	1
TP324827	0_to_10000	g3352.t1	CBS domain and Chloride channel, voltage gated family and Chloride channel, core domain-containing protein [Strongyloides ratti]	complex	start_lost	1	1	1	1
TP324827	0_to_10000	g3352.t1	CBS domain and Chloride channel, voltage gated family and Chloride channel, core domain-containing protein [Strongyloides ratti]	snp	splice_donor_variant&intron_variant	1	1	1	1
TP324827	0_to_10000	g3352.t2	Chloride channel protein 1 [Toxocara canis]	del	frameshift_variant	1	1	1	1
TP324827	10000_to_20000
TP324827	10000_to_20000	g9316.t1		complex	frameshift_variant&missense_variant	1	1	1	1
TP324827	10000_to_20000	g2722.t1		complex	frameshift_variant&stop_lost&splice_region_variant	1	1	1	1
TP324827	10000_to_20000	g2722.t1		del,snp	frameshift_variant	0.759615	0.795181	0.532189	0.666667
TP324827	10000_to_20000	g2722.t1		snp	splice_acceptor_variant&intron_variant	0.791045	0.708738	0.62037	0.695652
TP324827	10000_to_20000	g3352.t2	Chloride channel protein 1 [Toxocara canis]	ins	splice_acceptor_variant&intron_variant	1	1	1	1
TP324827	10000_to_20000	g3352.t2	Chloride channel protein 1 [Toxocara canis]	del	frameshift_variant	1	1	1	1
TP324827	10000_to_20000	g3352.t2	Chloride channel protein 1 [Toxocara canis]	complex	splice_acceptor_variant&splice_region_variant&synonymous_variant&intron_variant	1	1	1	1
TP324827	10000_to_20000	g3352.t2	Chloride channel protein 1 [Toxocara canis]	ins	frameshift_variant	0.489796	0.552239	0.653595	0.214286
TP324827	10000_to_20000	g3354.t1	Ras family protein [Necator americanus]	ins	splice_donor_variant&intron_variant	0.166667	0.384615	0.222222	0
TP324827	10000_to_20000	g3355.t2	Serine/threonine-protein phosphatase PGAM5, mitochondrial [Strongyloides ratti]	ins	splice_donor_variant&intron_variant	1	1	1	1
TP324827	10000_to_20000	g3355.t2	Serine/threonine-protein phosphatase PGAM5, mitochondrial [Strongyloides ratti]	del	frameshift_variant	1	1	1	1
TP324827	10000_to_20000	g3355.t2	Serine/threonine-protein phosphatase PGAM5, mitochondrial [Strongyloides ratti]	snp	stop_gained	1	1	1	1
TP324827	10000_to_20000	g3355.t2	Serine/threonine-protein phosphatase PGAM5, mitochondrial [Strongyloides ratti]	snp	stop_gained	1	1	1	1
TP324827	20000_to_30000
TP324827	20000_to_30000	g2722.t1		ins	frameshift_variant	0.440678	0.0948276	0.238636	0.88
TP324827	20000_to_30000	g2722.t1		ins	frameshift_variant	1	0.921875	0.989691	1
TP324827	20000_to_30000	g2722.t1		del	frameshift_variant	1	1	1	1
TP324827	20000_to_30000	g2722.t1		snp	stop_gained	1	1	1	1
TP324827	20000_to_30000	g2722.t1		ins	splice_donor_variant&intron_variant	1	1	1	1
TP324827	20000_to_30000	g2722.t1		snp	start_lost	1	1	1	1
TP324827	20000_to_30000	g2723.t1		complex,complex,ins	frameshift_variant&synonymous_variant	1	1	1	1
TP324827	20000_to_30000	g2723.t1		complex	frameshift_variant&missense_variant	1	1	1	1
TP324827	20000_to_30000	g2723.t1		del,snp	frameshift_variant	0.814815	0.888889	0.764706	1
TP324827	20000_to_30000	g2723.t1		del,snp	frameshift_variant	0.846154	1	1	1
TP324827	20000_to_30000	g2723.t1		complex	frameshift_variant&missense_variant&splice_region_variant	1	1	1	1
TP324827	20000_to_30000	g2723.t1		del,snp	frameshift_variant	0.774648	0.829268	0.863636	0.666667
TP324827	20000_to_30000	g2724.t1	glycosyltransferase, group 1 family protein [Necator americanus]	complex	frameshift_variant&synonymous_variant	0.6	0.672727	0.496	0.818182
TP324827	20000_to_30000	g2724.t1	glycosyltransferase, group 1 family protein [Necator americanus]	del,snp	frameshift_variant&splice_region_variant	0.637363	0.538462	0.6	0.307692
TP324827	20000_to_30000	g2724.t1	glycosyltransferase, group 1 family protein [Necator americanus]	ins	splice_acceptor_variant&intron_variant	1	1	1	0
TP324827	20000_to_30000	g2724.t1	glycosyltransferase, group 1 family protein [Necator americanus]	del	frameshift_variant&stop_lost&splice_region_variant	1	1	1	0
TP324827	20000_to_30000	g2724.t1	glycosyltransferase, group 1 family protein [Necator americanus]	ins	frameshift_variant	1	1	1	0
TP324827	20000_to_30000	g2724.t1	glycosyltransferase, group 1 family protein [Necator americanus]	ins	splice_acceptor_variant&intron_variant	1	1	1	1
TP324827	20000_to_30000	g2724.t1	glycosyltransferase, group 1 family protein [Necator americanus]	del	frameshift_variant	1	1	1	1
TP324827	20000_to_30000	g2724.t1	glycosyltransferase, group 1 family protein [Necator americanus]	del	frameshift_variant	1	1	1	0
TP324827	20000_to_30000	g2724.t1	glycosyltransferase, group 1 family protein [Necator americanus]	snp	splice_donor_variant&intron_variant	0.5	0.375	0.2	1
TP324827	20000_to_30000	g2724.t1	glycosyltransferase, group 1 family protein [Necator americanus]	del	frameshift_variant	0.944444	0.789474	0.928571	1
TP324827	20000_to_30000	g2724.t1	glycosyltransferase, group 1 family protein [Necator americanus]	del	frameshift_variant	1	1	1	1
TP324827	20000_to_30000	g2725.t1		snp	splice_donor_variant&intron_variant	0.818182	0.793103	1	0
TP324827	20000_to_30000	g3356.t1	cpsf3-prov protein [Brugia malayi]	complex,snp	splice_donor_variant&splice_region_variant&synonymous_variant&intron_variant	1	1	1	1
TP324827	20000_to_30000	g3357.t1	calcium homeostasis endoplasmic reticulum protein [Loa loa]	complex,snp,snp	stop_gained	0	0.3	0	0.5
TP324827	20000_to_30000	g3357.t1	calcium homeostasis endoplasmic reticulum protein [Loa loa]	complex,snp	frameshift_variant&synonymous_variant	0	0.181818	0.0757576	0.5
TP324827	20000_to_30000	g3357.t1	calcium homeostasis endoplasmic reticulum protein [Loa loa]	ins	frameshift_variant	1	0.942857	1	1
TP324827	20000_to_30000	g3358.t1	Myeloid leukemia factor [Toxocara canis]	snp	splice_acceptor_variant&intron_variant	1	0.923077	1	1
TP324827	30000_to_40000
TP324827	30000_to_40000	g9318.t1		ins	frameshift_variant	0	0	0	0
TP324827	30000_to_40000	g9320.t1		ins	frameshift_variant	0.9375	0.952381	0.692308	0
TP324827	30000_to_40000	g3359.t1	Rab11 family-interacting protein 4A [Loa loa]	complex,snp	frameshift_variant&missense_variant	1	1	1	1
TP324827	30000_to_40000	g3359.t1	Rab11 family-interacting protein 4A [Loa loa]	del	frameshift_variant	0.978261	1	1	1
TP324827	30000_to_40000	g3359.t1	Rab11 family-interacting protein 4A [Loa loa]	snp	splice_donor_variant&intron_variant	1	1	1	1
TP324827	30000_to_40000	g3360.t1		ins	frameshift_variant	1	1	1	1
TP324827	30000_to_40000	g3360.t1		del	frameshift_variant	1	0.913043	1	1
TP324827	30000_to_40000	g3361.t1		del	frameshift_variant	0.947368	1	1	1
TP324827	30000_to_40000	g3362.t1	Alpha crystallin/Hsp20 domain and HSP20-like chaperone domain-containing protein [Strongyloides ratti]	del,snp	frameshift_variant	1	1	1	1
TP324827	30000_to_40000	g3362.t1	Alpha crystallin/Hsp20 domain and HSP20-like chaperone domain-containing protein [Strongyloides ratti]	complex	splice_acceptor_variant&splice_region_variant&synonymous_variant&intron_variant	1	1	1	1
TP324827	40000_to_50000
TP324827	40000_to_50000	g9321.t1		ins	frameshift_variant	0.847826	1	0.777778	1
TP324827	40000_to_50000	g9321.t1		del,del	frameshift_variant	0.925	1	0.894737	1
TP324827	40000_to_50000	g9321.t1		snp	splice_acceptor_variant&intron_variant	1	1	1	1
TP324827	40000_to_50000	g3364.t1	G-protein beta subunit [Meloidogyne javanica]	snp	stop_gained	1	0.945946	1	1
TP324827	40000_to_50000	g3364.t1	G-protein beta subunit [Meloidogyne javanica]	complex,complex,snp	splice_acceptor_variant&splice_region_variant&synonymous_variant&intron_variant	0.782051	0.69697	0.842697	0.6
TP324827	40000_to_50000	g3364.t1	G-protein beta subunit [Meloidogyne javanica]	del	frameshift_variant	1	1	1	1
TP324827	40000_to_50000	g3365.t1	Protein C18A3.4, isoform b [Haemonchus contortus]	snp	stop_gained	1	1	1	1
TP324827	40000_to_50000	g3366.t1	7 transmembrane receptor [Oesophagostomum dentatum]	snp	splice_acceptor_variant&intron_variant	1	1	1	1
TP324827	40000_to_50000	g3366.t1	7 transmembrane receptor [Oesophagostomum dentatum]	snp	splice_acceptor_variant&intron_variant	1	1	1	1
TP324827	40000_to_50000	g3366.t1	7 transmembrane receptor [Oesophagostomum dentatum]	snp	splice_donor_variant&intron_variant	1	1	1	1
TP	position	Gene	Info	Type	TypeExtended	IL4	KS2	ON1	ON34
TP333577	-50000_to_-40000
TP333577	-50000_to_-40000	g16694.t1	Astacin-like metalloendopeptidase [Strongyloides ratti]	ins	frameshift_variant	1	1	1	1
TP333577	-50000_to_-40000	g16695.t1		complex,complex	frameshift_variant&synonymous_variant	1	1	1	1
TP333577	-50000_to_-40000	g16695.t1		snp	stop_gained	1	1	1	1
TP333577	-50000_to_-40000	g16695.t1		complex,snp	splice_donor_variant&splice_region_variant&synonymous_variant&intron_variant	1	1	1	1
TP333577	-50000_to_-40000	g16696.t2	AFG3-like protein 2 [Toxocara canis]	mnp	stop_lost&splice_region_variant	1	1	1	1
TP333577	-50000_to_-40000	g16696.t2	AFG3-like protein 2 [Toxocara canis]	complex,ins,ins	frameshift_variant	0.0833333	0	0.015873	0
TP333577	-50000_to_-40000	g16696.t2	AFG3-like protein 2 [Toxocara canis]	snp	stop_gained	1	1	1	1
TP333577	-50000_to_-40000	g16696.t2	AFG3-like protein 2 [Toxocara canis]	complex,del,snp	frameshift_variant	0.5	0.708333	0.571429	0
TP333577	-50000_to_-40000	g16696.t2	AFG3-like protein 2 [Toxocara canis]	del	frameshift_variant	1	1	1	1
TP333577	-50000_to_-40000	g16696.t2	AFG3-like protein 2 [Toxocara canis]	ins	frameshift_variant	1	1	1	0
TP333577	-50000_to_-40000	g16696.t2	AFG3-like protein 2 [Toxocara canis]	del	frameshift_variant	0	1	0	0
TP333577	-50000_to_-40000	g16696.t2	AFG3-like protein 2 [Toxocara canis]	snp	splice_acceptor_variant&intron_variant	1	1	1	0
TP333577	-50000_to_-40000	g16696.t2	AFG3-like protein 2 [Toxocara canis]	snp	splice_donor_variant&intron_variant	1	1	1	1
TP333577	-50000_to_-40000	g16696.t2	AFG3-like protein 2 [Toxocara canis]	complex,mnp	stop_gained	1	1	1	1
TP333577	-50000_to_-40000	g16696.t2	AFG3-like protein 2 [Toxocara canis]	ins	frameshift_variant	1	1	1	1
TP333577	-50000_to_-40000	g16696.t2	AFG3-like protein 2 [Toxocara canis]	ins,ins	frameshift_variant	0	0	0	0
TP333577	-50000_to_-40000	g16696.t2	AFG3-like protein 2 [Toxocara canis]	complex,complex	splice_acceptor_variant&missense_variant&splice_region_variant&intron_variant	1	1	1	1
TP333577	-50000_to_-40000	g16696.t2	AFG3-like protein 2 [Toxocara canis]	complex,complex,complex	frameshift_variant&stop_gained	1	1	1	1
TP333577	-50000_to_-40000	g16696.t2	AFG3-like protein 2 [Toxocara canis]	snp	stop_gained	1	1	1	1
TP333577	-50000_to_-40000	g16696.t2	AFG3-like protein 2 [Toxocara canis]	complex,ins	frameshift_variant&missense_variant	0	0	0	0
TP333577	-50000_to_-40000	g16696.t2	AFG3-like protein 2 [Toxocara canis]	snp	stop_gained	0.970149	0.875	0.731707	0
TP333577	-50000_to_-40000	g16696.t2	AFG3-like protein 2 [Toxocara canis]	ins	frameshift_variant	1	1	1	1
TP333577	-50000_to_-40000	g16696.t2	AFG3-like protein 2 [Toxocara canis]	del	frameshift_variant	1	1	1	1
TP333577	-50000_to_-40000	g16696.t2	AFG3-like protein 2 [Toxocara canis]	complex	splice_acceptor_variant&splice_region_variant&synonymous_variant&intron_variant	1	1	1	1
TP333577	-40000_to_-30000
TP333577	-40000_to_-30000	g16696.t2	AFG3-like protein 2 [Toxocara canis]	snp	splice_acceptor_variant&intron_variant	1	1	1	1
TP333577	-40000_to_-30000	g16696.t2	AFG3-like protein 2 [Toxocara canis]	ins,ins	frameshift_variant	0	0	0	0
TP333577	-40000_to_-30000	g16696.t2	AFG3-like protein 2 [Toxocara canis]	del,snp	frameshift_variant	1	1	1	1
TP333577	-30000_to_-20000
TP333577	-20000_to_-10000
TP333577	-10000_to_0
TP333577	-10000_to_0	g16697.t1	Cadherin domain containing protein [Haemonchus contortus]	ins	splice_acceptor_variant&intron_variant	1	1	1	1
TP333577	-10000_to_0	g16697.t1	Cadherin domain containing protein [Haemonchus contortus]	snp	stop_gained&splice_region_variant	1	1	1	1
TP333577	-10000_to_0	g16697.t1	Cadherin domain containing protein [Haemonchus contortus]	del	frameshift_variant	1	1	1	1
TP333577	-10000_to_0	g16697.t1	Cadherin domain containing protein [Haemonchus contortus]	del	frameshift_variant	1	1	1	1
TP333577	-10000_to_0	g16697.t1	Cadherin domain containing protein [Haemonchus contortus]	snp	splice_donor_variant&intron_variant	1	1	1	1
TP333577	-10000_to_0	g16697.t1	Cadherin domain containing protein [Haemonchus contortus]	complex,complex	splice_acceptor_variant&missense_variant&splice_region_variant&intron_variant	1	1	1	1
TP333577	-10000_to_0	g16697.t1	Cadherin domain containing protein [Haemonchus contortus]	del	stop_gained&disruptive_inframe_deletion	1	1	1	1
TP333577	-10000_to_0	g16697.t1	Cadherin domain containing protein [Haemonchus contortus]	del	frameshift_variant	1	1	1	1
TP333577	-10000_to_0	g16697.t1	Cadherin domain containing protein [Haemonchus contortus]	complex,complex	frameshift_variant&missense_variant	1	1	1	1
TP333577	-10000_to_0	g16697.t1	Cadherin domain containing protein [Haemonchus contortus]	del,snp	frameshift_variant	1	1	1	1
TP333577	-10000_to_0	g16697.t1	Cadherin domain containing protein [Haemonchus contortus]	del	frameshift_variant	1	1	1	1
TP333577	-10000_to_0	g16697.t1	Cadherin domain containing protein [Haemonchus contortus]	complex,snp	frameshift_variant&synonymous_variant	1	1	1	1
TP333577	-10000_to_0	g16697.t1	Cadherin domain containing protein [Haemonchus contortus]	ins	frameshift_variant	1	1	1	1
TP333577	-10000_to_0	g16697.t1	Cadherin domain containing protein [Haemonchus contortus]	snp	stop_gained	1	1	1	0
TP333577	-10000_to_0	g16697.t1	Cadherin domain containing protein [Haemonchus contortus]	del	frameshift_variant	1	1	1	1
TP333577	-10000_to_0	g16697.t1	Cadherin domain containing protein [Haemonchus contortus]	complex	frameshift_variant&missense_variant	1	1	1	1
TP333577	-10000_to_0	g16697.t1	Cadherin domain containing protein [Haemonchus contortus]	del	frameshift_variant	1	1	1	1
TP333577	-10000_to_0	g16697.t1	Cadherin domain containing protein [Haemonchus contortus]	del,snp	frameshift_variant	1	1	1	1
TP333577	-10000_to_0	g16697.t1	Cadherin domain containing protein [Haemonchus contortus]	snp,snp	splice_donor_variant&intron_variant	1	0.933333	1	1
TP333577	-10000_to_0	g16697.t1	Cadherin domain containing protein [Haemonchus contortus]	del	frameshift_variant	1	1	1	1
TP333577	-10000_to_0	g16697.t1	Cadherin domain containing protein [Haemonchus contortus]	snp	splice_donor_variant&intron_variant	1	1	1	0
TP333577	-10000_to_0	g16697.t1	Cadherin domain containing protein [Haemonchus contortus]	del	frameshift_variant	1	1	1	1
TP333577	-10000_to_0	g16697.t1	Cadherin domain containing protein [Haemonchus contortus]	ins	frameshift_variant	1	1	1	1
TP333577	-10000_to_0	g16697.t1	Cadherin domain containing protein [Haemonchus contortus]	snp	splice_donor_variant&intron_variant	0.0526316	0	0.166667	1
TP333577	-10000_to_0	g16697.t1	Cadherin domain containing protein [Haemonchus contortus]	del	frameshift_variant	1	1	1	1
TP333577	-10000_to_0	g16697.t1	Cadherin domain containing protein [Haemonchus contortus]	ins	frameshift_variant	1	1	1	1
TP333577	-10000_to_0	g16697.t1	Cadherin domain containing protein [Haemonchus contortus]	complex	frameshift_variant&missense_variant	1	1	1	1
TP333577	-10000_to_0	g16697.t1	Cadherin domain containing protein [Haemonchus contortus]	complex,complex,snp	stop_gained	1	1	1	1
TP333577	-10000_to_0	g16697.t1	Cadherin domain containing protein [Haemonchus contortus]	mnp	stop_gained	1	1	1	1
TP333577	-10000_to_0	g16697.t1	Cadherin domain containing protein [Haemonchus contortus]	del	frameshift_variant	1	1	1	1
TP333577	0_to_10000
TP333577	0_to_10000	g16697.t1	Cadherin domain containing protein [Haemonchus contortus]	del	frameshift_variant	1	1	1	1
TP333577	0_to_10000	g16697.t1	Cadherin domain containing protein [Haemonchus contortus]	del,snp	frameshift_variant	0.934783	0.928571	0.969231	1
TP333577	0_to_10000	g16697.t1	Cadherin domain containing protein [Haemonchus contortus]	ins	splice_acceptor_variant&intron_variant	0.864865	0.903226	1	1
TP333577	0_to_10000	g16697.t1	Cadherin domain containing protein [Haemonchus contortus]	del	frameshift_variant	1	1	1	1
TP333577	0_to_10000	g16697.t1	Cadherin domain containing protein [Haemonchus contortus]	del	frameshift_variant	1	1	1	1
TP333577	0_to_10000	g16697.t1	Cadherin domain containing protein [Haemonchus contortus]	snp	stop_gained	1	1	1	1
TP333577	0_to_10000	g16697.t1	Cadherin domain containing protein [Haemonchus contortus]	snp	stop_gained	1	1	1	1
TP333577	0_to_10000	g16697.t1	Cadherin domain containing protein [Haemonchus contortus]	del	frameshift_variant	1	1	1	1
TP333577	0_to_10000	g16697.t1	Cadherin domain containing protein [Haemonchus contortus]	ins	frameshift_variant	1	1	1	1
TP333577	0_to_10000	g16697.t1	Cadherin domain containing protein [Haemonchus contortus]	ins	frameshift_variant	1	1	1	1
TP333577	0_to_10000	g16697.t1	Cadherin domain containing protein [Haemonchus contortus]	ins	frameshift_variant&stop_lost&splice_region_variant	1	1	1	1
TP333577	0_to_10000	g16698.t1	Cadherin domain containing protein [Brugia malayi]	del	frameshift_variant	1	1	1	1
TP333577	0_to_10000	g16698.t1	Cadherin domain containing protein [Brugia malayi]	del,ins	frameshift_variant&splice_donor_variant&splice_region_variant&intron_variant	0.295455	0.880952	0.729167	0
TP333577	0_to_10000	g16699.t1	Transcription factor E2F dimerisation partner (TDP) domain containing protein [Haemonchus contortus]	ins,ins	frameshift_variant	0	0	0	0
TP333577	0_to_10000	g16699.t1	Transcription factor E2F dimerisation partner (TDP) domain containing protein [Haemonchus contortus]	snp	stop_gained	1	1	1	1
TP333577	0_to_10000	g16699.t1	Transcription factor E2F dimerisation partner (TDP) domain containing protein [Haemonchus contortus]	snp	splice_donor_variant&intron_variant	1	1	1	1
TP333577	10000_to_20000
TP333577	10000_to_20000	g16700.t1		del	frameshift_variant	0	0	0	0
TP333577	20000_to_30000
TP333577	30000_to_40000
TP333577	30000_to_40000	g16706.t1	Neprilysin-1 [Toxocara canis]	del	frameshift_variant	1	1	1	1
TP333577	30000_to_40000	g16706.t1	Neprilysin-1 [Toxocara canis]	snp	stop_gained	1	1	1	1
TP333577	30000_to_40000	g16706.t1	Neprilysin-1 [Toxocara canis]	snp	stop_gained	1	1	1	1
TP333577	30000_to_40000	g16706.t1	Neprilysin-1 [Toxocara canis]	del,snp	frameshift_variant	1	1	1	1
TP333577	40000_to_50000
TP333577	40000_to_50000	g16706.t1	Neprilysin-1 [Toxocara canis]	del	frameshift_variant	1	1	1	1
TP333577	40000_to_50000	g16706.t1	Neprilysin-1 [Toxocara canis]	snp	stop_gained	1	0.931034	1	1
TP333577	40000_to_50000	g16706.t1	Neprilysin-1 [Toxocara canis]	complex,complex,snp	frameshift_variant&missense_variant	0.202703	0.603448	0.739837	0
TP333577	40000_to_50000	g16707.t1	Neprilysin-2 [Toxocara canis]	del	frameshift_variant	1	1	1	0
TP333577	40000_to_50000	g16707.t1	Neprilysin-2 [Toxocara canis]	del	frameshift_variant	1	1	1	1
TP	position	Gene	Info	Type	TypeExtended	IL4	KS2	ON1	ON34
TP333913	-50000_to_-40000
TP333913	-50000_to_-40000	g14613.t1	transmembrane protein 120A [Loa loa]	snp	splice_donor_variant&intron_variant	1	1	1	1
TP333913	-50000_to_-40000	g14614.t1	Sodium-dependent acetylcholine transporter [Toxocara canis]	del	frameshift_variant	1	1	1	1
TP333913	-50000_to_-40000	g14614.t1	Sodium-dependent acetylcholine transporter [Toxocara canis]	snp	splice_donor_variant&intron_variant	1	0.892857	1	1
TP333913	-50000_to_-40000	g14614.t1	Sodium-dependent acetylcholine transporter [Toxocara canis]	del,snp	frameshift_variant&splice_donor_variant&splice_region_variant&intron_variant	0.975	0.981481	0.528571	1
TP333913	-50000_to_-40000	g14614.t1	Sodium-dependent acetylcholine transporter [Toxocara canis]	del	frameshift_variant	1	1	1	1
TP333913	-50000_to_-40000	g14614.t1	Sodium-dependent acetylcholine transporter [Toxocara canis]	ins	frameshift_variant	1	1	1	1
TP333913	-50000_to_-40000	g14614.t1	Sodium-dependent acetylcholine transporter [Toxocara canis]	complex	splice_acceptor_variant&splice_region_variant&synonymous_variant&intron_variant	1	1	1	1
TP333913	-50000_to_-40000	g14614.t1	Sodium-dependent acetylcholine transporter [Toxocara canis]	snp	stop_gained	1	1	1	1
TP333913	-50000_to_-40000	g14615.t1	putative ubiquitin carboxyl-terminal hydrolase 46 [Toxocara canis]	snp	stop_gained	1	1	1	1
TP333913	-50000_to_-40000	g14615.t1	putative ubiquitin carboxyl-terminal hydrolase 46 [Toxocara canis]	snp	stop_gained	1	1	1	1
TP333913	-40000_to_-30000
TP333913	-40000_to_-30000	g14616.t1	Box C/D snoRNA protein 1 [Toxocara canis]	complex,complex	splice_acceptor_variant&missense_variant&splice_region_variant&intron_variant	1	1	1	1
TP333913	-40000_to_-30000	g14616.t1	Box C/D snoRNA protein 1 [Toxocara canis]	del,snp,snp	frameshift_variant&splice_region_variant	1	1	1	1
TP333913	-40000_to_-30000	g14616.t1	Box C/D snoRNA protein 1 [Toxocara canis]	snp	stop_gained	1	1	1	1
TP333913	-40000_to_-30000	g14616.t1	Box C/D snoRNA protein 1 [Toxocara canis]	del	frameshift_variant	1	1	1	1
TP333913	-40000_to_-30000	g14617.t1	Immunoglobulin domain containing protein [Haemonchus contortus]	snp	stop_gained	1	1	1	1
TP333913	-40000_to_-30000	g14617.t1	Immunoglobulin domain containing protein [Haemonchus contortus]	del	frameshift_variant	1	1	1	1
TP333913	-40000_to_-30000	g14617.t1	Immunoglobulin domain containing protein [Haemonchus contortus]	del	frameshift_variant	1	1	1	1
TP333913	-40000_to_-30000	g14617.t1	Immunoglobulin domain containing protein [Haemonchus contortus]	del	frameshift_variant	1	0.931034	1	1
TP333913	-40000_to_-30000	g14617.t1	Immunoglobulin domain containing protein [Haemonchus contortus]	complex,snp	frameshift_variant&missense_variant	0	0.266667	0.5	0
TP333913	-40000_to_-30000	g14618.t1		complex	frameshift_variant&missense_variant	0.94186	0.983871	0.954198	1
TP333913	-40000_to_-30000	g14618.t1		complex	frameshift_variant&missense_variant&splice_region_variant	0.935065	0.982759	0.952381	1
TP333913	-40000_to_-30000	g14619.t1		ins	frameshift_variant	0.0933333	0.0289855	0.649635	0
TP333913	-40000_to_-30000	g14619.t1		ins	frameshift_variant	0.935065	0.969231	0.435115	1
TP333913	-30000_to_-20000
TP333913	-30000_to_-20000	g14620.t1	Prominin domain containing protein [Haemonchus contortus]	complex	stop_gained&missense_variant&inframe_insertion	0.916667	0.807692	1	1
TP333913	-30000_to_-20000	g14620.t1	Prominin domain containing protein [Haemonchus contortus]	complex	stop_gained	0.92	0.931034	1	1
TP333913	-30000_to_-20000	g14620.t1	Prominin domain containing protein [Haemonchus contortus]	ins	frameshift_variant	1	0.724138	1	0
TP333913	-30000_to_-20000	g14620.t1	Prominin domain containing protein [Haemonchus contortus]	snp	stop_gained	1	0.848485	1	0.142857
TP333913	-30000_to_-20000	g14621.t1		ins	splice_donor_variant&intron_variant	0.634615	0.893333	0.946903	0.631579
TP333913	-30000_to_-20000	g14621.t1		ins	splice_donor_variant&intron_variant	0.739583	0.955882	0.958621	0.954545
TP333913	-30000_to_-20000	g14621.t1		complex	splice_donor_variant&intron_variant	1	0.977273	1	1
TP333913	-30000_to_-20000	g14621.t1		ins	splice_acceptor_variant&intron_variant	0.418182	0.686747	0.705357	0.875
TP333913	-20000_to_-10000
TP333913	-20000_to_-10000	g14622.t1	Prominin domain containing protein [Haemonchus contortus]	del,snp	frameshift_variant	1	1	0.985294	1
TP333913	-20000_to_-10000	g14622.t1	Prominin domain containing protein [Haemonchus contortus]	snp	splice_acceptor_variant&intron_variant	1	1	1	1
TP333913	-20000_to_-10000	g14622.t1	Prominin domain containing protein [Haemonchus contortus]	del	frameshift_variant	1	1	0.944444	1
TP333913	-20000_to_-10000	g14622.t1	Prominin domain containing protein [Haemonchus contortus]	snp	splice_donor_variant&intron_variant	1	1	1	1
TP333913	-20000_to_-10000	g14622.t1	Prominin domain containing protein [Haemonchus contortus]	complex,complex,snp	frameshift_variant&missense_variant	1	0.758621	0.986111	1
TP333913	-20000_to_-10000	g14623.t1		ins,ins	frameshift_variant	0.947368	1	1	0
TP333913	-20000_to_-10000	g14623.t1		ins,snp	frameshift_variant	0.947368	0.764706	0.421053	0
TP333913	-10000_to_0
TP333913	-10000_to_0	g14624.t1	Protein F49H12.5 [Haemonchus contortus]	snp	stop_gained	0.935484	1	1	1
TP333913	-10000_to_0	g14624.t1	Protein F49H12.5 [Haemonchus contortus]	complex,complex,complex,del	frameshift_variant&missense_variant	0	0	0	0
TP333913	-10000_to_0	g14625.t1	Protein CBG15435 [Caenorhabditis briggsae]	complex	frameshift_variant&splice_donor_variant&splice_region_variant&synonymous_variant&intron_variant	1	1	1	1
TP333913	-10000_to_0	g14625.t1	Protein CBG15435 [Caenorhabditis briggsae]	del	frameshift_variant	1	1	1	1
TP333913	-10000_to_0	g14625.t1	Protein CBG15435 [Caenorhabditis briggsae]	del,snp	frameshift_variant	1	0.9375	0.891892	1
TP333913	-10000_to_0	g14625.t1	Protein CBG15435 [Caenorhabditis briggsae]	snp	splice_donor_variant&intron_variant	1	1	1	1
TP333913	-10000_to_0	g14625.t1	Protein CBG15435 [Caenorhabditis briggsae]	complex,del	frameshift_variant&stop_lost	1	0.709677	0.88	0
TP333913	-10000_to_0	g14626.t1	Fibroblast growth factor 17 [Toxocara canis]	mnp	splice_donor_variant&splice_region_variant&intron_variant	1	1	1	1
TP333913	-10000_to_0	g14626.t1	Fibroblast growth factor 17 [Toxocara canis]	del	frameshift_variant&splice_region_variant	1	1	1	1
TP333913	0_to_10000
TP333913	0_to_10000	g14626.t1	Fibroblast growth factor 17 [Toxocara canis]	del	frameshift_variant	1	0.909091	1	1
TP333913	0_to_10000	g14627.t1		ins	frameshift_variant&start_lost	1	1	0.907895	1
TP333913	0_to_10000	g14627.t1		ins	frameshift_variant	1	1	1	1
TP333913	0_to_10000	g14628.t1		complex,del	stop_gained&inframe_deletion	1	1	1	1
TP333913	0_to_10000	g14628.t1		ins	splice_donor_variant&intron_variant	1	1	1	1
TP333913	0_to_10000	g14628.t1		del,snp,snp	frameshift_variant	0.939394	1	1	1
TP333913	0_to_10000	g14628.t1		snp	splice_acceptor_variant&intron_variant	1	1	1	1
TP333913	0_to_10000	g14628.t1		del	frameshift_variant	1	1	1	0
TP333913	0_to_10000	g14628.t1		snp	stop_gained	1	0.925926	1	1
TP333913	0_to_10000	g14628.t1		snp	stop_gained	1	1	1	1
TP333913	0_to_10000	g14628.t1		snp	splice_donor_variant&intron_variant	1	1	1	1
TP333913	0_to_10000	g14628.t1		snp	stop_gained	1	1	1	1
TP333913	10000_to_20000
TP333913	10000_to_20000	g14629.t2		snp	stop_gained	1	1	1	1
TP333913	10000_to_20000	g14629.t2		snp	splice_donor_variant&intron_variant	1	1	1	1
TP333913	10000_to_20000	g14629.t2		snp	splice_donor_variant&intron_variant	1	1	1	1
TP333913	10000_to_20000	g14630.t1		del	frameshift_variant	1	1	1	1
TP333913	10000_to_20000	g14630.t1		ins	frameshift_variant	1	1	1	1
TP333913	10000_to_20000	g14630.t1		ins	frameshift_variant	1	1	1	1
TP333913	10000_to_20000	g14630.t1		snp	start_lost	1	1	1	1
TP333913	20000_to_30000
TP333913	20000_to_30000	g14631.t1		del	frameshift_variant&stop_lost&splice_region_variant	1	1	1	1
TP333913	20000_to_30000	g14631.t1		del	frameshift_variant	1	1	1	1
TP333913	20000_to_30000	g14632.t1	putative aconitate hydratase, mitochondrial [Toxocara canis]	ins	frameshift_variant	1	0.783784	0.945946	0
TP333913	20000_to_30000	g14631.t1		del,snp	frameshift_variant	0.86	0.836735	0.63	0
TP333913	20000_to_30000	g14632.t1	putative aconitate hydratase, mitochondrial [Toxocara canis]	del	frameshift_variant	1	1	1	1
TP333913	20000_to_30000	g14632.t1	putative aconitate hydratase, mitochondrial [Toxocara canis]	snp	splice_donor_variant&intron_variant	1	1	1	1
TP333913	30000_to_40000
TP333913	30000_to_40000	g14632.t1	putative aconitate hydratase, mitochondrial [Toxocara canis]	complex,del,ins,ins	splice_donor_variant&splice_region_variant&intron_variant	0	0.0377358	0.0406504	0
TP333913	30000_to_40000	g14633.t1	Cytohesin-1 [Trichinella zimbabwensis]	snp	splice_acceptor_variant&intron_variant	1	1	1	1
TP333913	30000_to_40000	g14633.t1	Cytohesin-1 [Trichinella zimbabwensis]	snp	splice_donor_variant&intron_variant	1	0.928571	1	1
TP333913	30000_to_40000	g14633.t1	Cytohesin-1 [Trichinella zimbabwensis]	del	frameshift_variant	1	1	1	1
TP333913	30000_to_40000	g14633.t1	Cytohesin-1 [Trichinella zimbabwensis]	snp	splice_donor_variant&intron_variant	1	1	1	1
TP333913	30000_to_40000	g14633.t1	Cytohesin-1 [Trichinella zimbabwensis]	ins	splice_donor_variant&intron_variant	1	1	1	1
TP333913	30000_to_40000	g14634.t1	putative atp-dependent rna helicase ddx58 [Ascaris suum]	del	frameshift_variant&start_lost	0.906977	0.666667	0.818182	0
TP333913	40000_to_50000
TP333913	40000_to_50000	g14634.t1	putative atp-dependent rna helicase ddx58 [Ascaris suum]	del	frameshift_variant	1	1	1	1
TP333913	40000_to_50000	g14634.t1	putative atp-dependent rna helicase ddx58 [Ascaris suum]	del	frameshift_variant	1	1	1	1
TP333913	40000_to_50000	g14634.t1	putative atp-dependent rna helicase ddx58 [Ascaris suum]	snp	stop_gained&splice_region_variant	1	1	1	1
TP333913	40000_to_50000	g14634.t1	putative atp-dependent rna helicase ddx58 [Ascaris suum]	snp	splice_acceptor_variant&intron_variant	1	1	0.882353	1
TP333913	40000_to_50000	g14634.t1	putative atp-dependent rna helicase ddx58 [Ascaris suum]	complex	splice_donor_variant&splice_region_variant&intron_variant	1	1	1	0
TP333913	40000_to_50000	g14634.t1	putative atp-dependent rna helicase ddx58 [Ascaris suum]	snp	splice_acceptor_variant&intron_variant	1	1	1	1
TP333913	40000_to_50000	g14635.t1	WW domain-binding protein 11, partial [Tinamus guttatus]	del	frameshift_variant	0.916667	1	1	1
TP333913	40000_to_50000	g14635.t1	WW domain-binding protein 11, partial [Tinamus guttatus]	del	frameshift_variant	1	1	1	1
TP	position	Gene	Info	Type	TypeExtended	IL4	KS2	ON1	ON34
TP364091	-50000_to_-40000
TP364091	-50000_to_-40000	g14629.t2		snp	splice_donor_variant&intron_variant	1	1	1	1
TP364091	-50000_to_-40000	g14630.t1		del	frameshift_variant	1	1	1	1
TP364091	-50000_to_-40000	g14630.t1		ins	frameshift_variant	1	1	1	1
TP364091	-50000_to_-40000	g14630.t1		ins	frameshift_variant	1	1	1	1
TP364091	-50000_to_-40000	g14630.t1		snp	start_lost	1	1	1	1
TP364091	-50000_to_-40000	g14638.t1	Carotenoid oxygenase domain containing protein [Haemonchus contortus]	ins	frameshift_variant	1	1	1	1
TP364091	-40000_to_-30000
TP364091	-40000_to_-30000	g14631.t1		del	frameshift_variant&stop_lost&splice_region_variant	1	1	1	1
TP364091	-40000_to_-30000	g14631.t1		del	frameshift_variant	1	1	1	1
TP364091	-40000_to_-30000	g14632.t1	putative aconitate hydratase, mitochondrial [Toxocara canis]	ins	frameshift_variant	1	0.783784	0.945946	0
TP364091	-40000_to_-30000	g14631.t1		del,snp	frameshift_variant	0.86	0.836735	0.63	0
TP364091	-40000_to_-30000	g14632.t1	putative aconitate hydratase, mitochondrial [Toxocara canis]	del	frameshift_variant	1	1	1	1
TP364091	-40000_to_-30000	g14632.t1	putative aconitate hydratase, mitochondrial [Toxocara canis]	snp	splice_donor_variant&intron_variant	1	1	1	1
TP364091	-40000_to_-30000	g14632.t1	putative aconitate hydratase, mitochondrial [Toxocara canis]	complex,del,ins,ins	splice_donor_variant&splice_region_variant&intron_variant	0	0.0377358	0.0406504	0
TP364091	-40000_to_-30000	g14633.t1	Cytohesin-1 [Trichinella zimbabwensis]	snp	splice_acceptor_variant&intron_variant	1	1	1	1
TP364091	-40000_to_-30000	g14633.t1	Cytohesin-1 [Trichinella zimbabwensis]	snp	splice_donor_variant&intron_variant	1	0.928571	1	1
TP364091	-30000_to_-20000
TP364091	-30000_to_-20000	g14644.t1	Dopamine receptor 3 [Caenorhabditis elegans]	del	frameshift_variant	0.5	0	1	1
TP364091	-30000_to_-20000	g14633.t1	Cytohesin-1 [Trichinella zimbabwensis]	del	frameshift_variant	1	1	1	1
TP364091	-30000_to_-20000	g14633.t1	Cytohesin-1 [Trichinella zimbabwensis]	snp	splice_donor_variant&intron_variant	1	1	1	1
TP364091	-30000_to_-20000	g14633.t1	Cytohesin-1 [Trichinella zimbabwensis]	ins	splice_donor_variant&intron_variant	1	1	1	1
TP364091	-30000_to_-20000	g14634.t1	putative atp-dependent rna helicase ddx58 [Ascaris suum]	del	frameshift_variant&start_lost	0.906977	0.666667	0.818182	0
TP364091	-30000_to_-20000	g14634.t1	putative atp-dependent rna helicase ddx58 [Ascaris suum]	del	frameshift_variant	1	1	1	1
TP364091	-30000_to_-20000	g14634.t1	putative atp-dependent rna helicase ddx58 [Ascaris suum]	del	frameshift_variant	1	1	1	1
TP364091	-30000_to_-20000	g14634.t1	putative atp-dependent rna helicase ddx58 [Ascaris suum]	snp	stop_gained&splice_region_variant	1	1	1	1
TP364091	-30000_to_-20000	g14634.t1	putative atp-dependent rna helicase ddx58 [Ascaris suum]	snp	splice_acceptor_variant&intron_variant	1	1	0.882353	1
TP364091	-30000_to_-20000	g14634.t1	putative atp-dependent rna helicase ddx58 [Ascaris suum]	complex	splice_donor_variant&splice_region_variant&intron_variant	1	1	1	0
TP364091	-30000_to_-20000	g14634.t1	putative atp-dependent rna helicase ddx58 [Ascaris suum]	snp	splice_acceptor_variant&intron_variant	1	1	1	1
TP364091	-20000_to_-10000
TP364091	-20000_to_-10000	g14635.t1	WW domain-binding protein 11, partial [Tinamus guttatus]	del	frameshift_variant	0.916667	1	1	1
TP364091	-20000_to_-10000	g14635.t1	WW domain-binding protein 11, partial [Tinamus guttatus]	del	frameshift_variant	1	1	1	1
TP364091	-20000_to_-10000	g14638.t1	Carotenoid oxygenase domain containing protein [Haemonchus contortus]	ins	frameshift_variant	1	1	1	1
TP364091	-20000_to_-10000	g14641.t1	predicted protein [Nematostella vectensis]	snp	stop_gained	1	1	0.866667	0
TP364091	-10000_to_0
TP364091	0_to_10000
TP364091	0_to_10000	g14644.t1	Dopamine receptor 3 [Caenorhabditis elegans]	del	frameshift_variant	0.5	0	1	1
TP364091	10000_to_20000
TP364091	10000_to_20000	g14641.t1	predicted protein [Nematostella vectensis]	snp	stop_gained	1	1	0.866667	0
TP364091	20000_to_30000
TP364091	20000_to_30000	g14656.t1	Major facilitator superfamily MFS-1 domain containing protein, partial [Haemonchus contortus]	del,snp	frameshift_variant	1	1	1	1
TP364091	20000_to_30000	g14656.t1	Major facilitator superfamily MFS-1 domain containing protein, partial [Haemonchus contortus]	snp	splice_acceptor_variant&intron_variant	1	1	0.947368	1
TP364091	20000_to_30000	g14656.t1	Major facilitator superfamily MFS-1 domain containing protein, partial [Haemonchus contortus]	del	frameshift_variant	1	0.95	1	1
TP364091	20000_to_30000	g14656.t1	Major facilitator superfamily MFS-1 domain containing protein, partial [Haemonchus contortus]	del,snp	stop_lost&splice_region_variant	1	1	1	1
TP364091	20000_to_30000	g14657.t1	Glycoside hydrolase and Peptidoglycan binding and Peptidase M10A M12B and Hemopexin matrixin domain containing protein [Haemonchus contortus]	del,snp	frameshift_variant	0.783784	0.791667	0.96875	1
TP364091	30000_to_40000
TP364091	30000_to_40000	g14657.t1	Glycoside hydrolase and Peptidoglycan binding and Peptidase M10A M12B and Hemopexin matrixin domain containing protein [Haemonchus contortus]	snp	splice_donor_variant&intron_variant	1	1	1	0
TP364091	30000_to_40000	g14658.t1	putative ATP-dependent RNA helicase DDX11 [Toxocara canis]	del,snp	frameshift_variant	1	1	1	1
TP364091	30000_to_40000	g14658.t1	putative ATP-dependent RNA helicase DDX11 [Toxocara canis]	del,snp	frameshift_variant	1	1	1	1
TP364091	30000_to_40000	g14658.t1	putative ATP-dependent RNA helicase DDX11 [Toxocara canis]	snp	stop_gained	1	1	1	1
TP364091	30000_to_40000	g14659.t1	methyltransferase, partial [Pristionchus pacificus]	complex,complex	splice_donor_variant&missense_variant&splice_region_variant&intron_variant	1	1	1	1
TP364091	30000_to_40000	g14660.t1	DNA repair helicase [Auricularia subglabra TFB-10046 SS5]	snp	stop_gained	1	1	1	1
TP364091	30000_to_40000	g14660.t1	DNA repair helicase [Auricularia subglabra TFB-10046 SS5]	del,del,ins	frameshift_variant	1	0.888889	0.931034	1
TP364091	30000_to_40000	g14660.t1	DNA repair helicase [Auricularia subglabra TFB-10046 SS5]	complex	frameshift_variant&missense_variant	1	1	1	1
TP364091	30000_to_40000	g14660.t1	DNA repair helicase [Auricularia subglabra TFB-10046 SS5]	del	frameshift_variant	1	1	1	1
TP364091	40000_to_50000
TP364091	40000_to_50000	g14661.t1	FACT complex subunit spt-16 [Toxocara canis]	snp	stop_gained	1	1	1	1
TP364091	40000_to_50000	g14661.t1	FACT complex subunit spt-16 [Toxocara canis]	complex,ins	splice_donor_variant&intron_variant	1	1	1	1
TP364091	40000_to_50000	g14661.t1	FACT complex subunit spt-16 [Toxocara canis]	complex	splice_donor_variant&splice_region_variant&synonymous_variant&intron_variant	1	1	1	1
TP364091	40000_to_50000	g14661.t1	FACT complex subunit spt-16 [Toxocara canis]	snp	stop_gained	1	1	1	1
TP364091	40000_to_50000	g14661.t1	FACT complex subunit spt-16 [Toxocara canis]	del	frameshift_variant	1	1	1	1
TP364091	40000_to_50000	g14661.t1	FACT complex subunit spt-16 [Toxocara canis]	snp	stop_gained	1	1	1	1
TP364091	40000_to_50000	g14661.t1	FACT complex subunit spt-16 [Toxocara canis]	del	frameshift_variant	1	1	1	0.75
TP364091	40000_to_50000	g14661.t1	FACT complex subunit spt-16 [Toxocara canis]	del	frameshift_variant	1	1	1	1
TP364091	40000_to_50000	g14661.t1	FACT complex subunit spt-16 [Toxocara canis]	snp	stop_gained	1	1	0.985714	0
TP364091	40000_to_50000	g14663.t1		complex,complex,snp	stop_gained	1	0.833333	0.46875	1
TP364091	40000_to_50000	g14663.t1		del	frameshift_variant	0.941176	1	1	1
TP364091	40000_to_50000	g14663.t1		del,snp	frameshift_variant	1	1	1	0
TP	position	Gene	Info	Type	TypeExtended	IL4	KS2	ON1	ON34
TP376687	-50000_to_-40000
TP376687	-50000_to_-40000	g18209.t1		complex,mnp,snp	frameshift_variant&missense_variant	0.774194	0.844444	0.42029	0.428571
TP376687	-50000_to_-40000	g18209.t1		complex,complex	frameshift_variant&missense_variant	0.947368	0.948718	0.957447	1
TP376687	-50000_to_-40000	g18209.t1		snp	splice_acceptor_variant&intron_variant	1	1	1	1
TP376687	-50000_to_-40000	g18209.t1		snp	stop_gained	0.947368	1	1	1
TP376687	-50000_to_-40000	g18209.t1		snp	splice_donor_variant&intron_variant	0.928571	1	1	0
TP376687	-40000_to_-30000
TP376687	-40000_to_-30000	g18209.t1		snp	splice_donor_variant&intron_variant	1	1	1	1
TP376687	-30000_to_-20000
TP376687	-30000_to_-20000	g18210.t1	Poly(A) polymerase central domain protein [Oesophagostomum dentatum]	del	frameshift_variant&splice_donor_variant&splice_region_variant&intron_variant	1	1	1	1
TP376687	-30000_to_-20000	g18210.t1	Poly(A) polymerase central domain protein [Oesophagostomum dentatum]	del	frameshift_variant	1	0.925926	1	1
TP376687	-30000_to_-20000	g18210.t1	Poly(A) polymerase central domain protein [Oesophagostomum dentatum]	complex	frameshift_variant&missense_variant	1	1	1	1
TP376687	-20000_to_-10000
TP376687	-20000_to_-10000	g18211.t1	Sodium-dependent phosphate transport protein 1 [Toxocara canis]	complex,del,snp	frameshift_variant&missense_variant	0.92	0.955556	1	1
TP376687	-20000_to_-10000	g18211.t1	Sodium-dependent phosphate transport protein 1 [Toxocara canis]	ins	splice_acceptor_variant&intron_variant	0.609756	0.692308	0.769231	0
TP376687	-20000_to_-10000	g18211.t1	Sodium-dependent phosphate transport protein 1 [Toxocara canis]	complex,snp,snp	stop_gained	0.466667	0.555556	0.631579	0
TP376687	-10000_to_0
TP376687	-10000_to_0	g18211.t1	Sodium-dependent phosphate transport protein 1 [Toxocara canis]	del	frameshift_variant	0.851852	0.943662	0.784091	0.833333
TP376687	-10000_to_0	g18211.t1	Sodium-dependent phosphate transport protein 1 [Toxocara canis]	complex	frameshift_variant&splice_region_variant&synonymous_variant	0.633333	0.4375	0.76	1
TP376687	-10000_to_0	g18211.t1	Sodium-dependent phosphate transport protein 1 [Toxocara canis]	snp	stop_lost	0.612903	0.388889	0.777778	1
TP376687	-10000_to_0	g18212.t1	transformation transcription domain-associated protein [Ascaris suum]	del,snp	frameshift_variant	1	1	1	1
TP376687	-10000_to_0	g18212.t1	transformation transcription domain-associated protein [Ascaris suum]	complex,snp	frameshift_variant&missense_variant	1	1	1	1
TP376687	-10000_to_0	g18212.t1	transformation transcription domain-associated protein [Ascaris suum]	ins,snp	frameshift_variant	1	1	1	0
TP376687	-10000_to_0	g18212.t1	transformation transcription domain-associated protein [Ascaris suum]	ins,snp	frameshift_variant	1	1	1	0
TP376687	-10000_to_0	g18212.t1	transformation transcription domain-associated protein [Ascaris suum]	del	frameshift_variant	1	1	1	1
TP376687	-10000_to_0	g18212.t1	transformation transcription domain-associated protein [Ascaris suum]	snp	splice_acceptor_variant&intron_variant	1	1	1	1
TP376687	0_to_10000
TP376687	0_to_10000	g18212.t1	transformation transcription domain-associated protein [Ascaris suum]	ins	frameshift_variant&splice_region_variant	1	1	1	1
TP376687	0_to_10000	g18212.t1	transformation transcription domain-associated protein [Ascaris suum]	complex	splice_donor_variant&splice_region_variant&intron_variant	1	1	1	1
TP376687	0_to_10000	g18212.t1	transformation transcription domain-associated protein [Ascaris suum]	complex	splice_acceptor_variant&missense_variant&splice_region_variant&intron_variant	1	1	1	0
TP376687	10000_to_20000
TP376687	20000_to_30000
TP376687	30000_to_40000
TP376687	40000_to_50000
TP	position	Gene	Info	Type	TypeExtended	IL4	KS2	ON1	ON34
TP380020	-50000_to_-40000
TP380020	-50000_to_-40000	g7285.t1	mtN3/saliva family protein [Dictyocaulus viviparus]	del	frameshift_variant	1	1	1	1
TP380020	-50000_to_-40000	g7285.t1	mtN3/saliva family protein [Dictyocaulus viviparus]	del	frameshift_variant	1	1	0.925926	1
TP380020	-50000_to_-40000	g7285.t1	mtN3/saliva family protein [Dictyocaulus viviparus]	del	frameshift_variant	0.913043	1	1	0
TP380020	-50000_to_-40000	g7286.t1		del,del,del,del	frameshift_variant	0	0	0	0
TP380020	-50000_to_-40000	g8304.t1	nuclear hormone receptor family member nhr-49 [Ascaris suum]	del	frameshift_variant	1	1	1	1
TP380020	-50000_to_-40000	g8305.t1	RecQ-mediated genome instability protein 1 [Toxocara canis]	snp	stop_gained	1	0.95	1	1
TP380020	-50000_to_-40000	g8305.t1	RecQ-mediated genome instability protein 1 [Toxocara canis]	mnp	splice_donor_variant&intron_variant	1	1	1	1
TP380020	-50000_to_-40000	g8305.t1	RecQ-mediated genome instability protein 1 [Toxocara canis]	del	frameshift_variant	1	1	1	1
TP380020	-50000_to_-40000	g8305.t1	RecQ-mediated genome instability protein 1 [Toxocara canis]	complex,snp	splice_donor_variant&splice_region_variant&synonymous_variant&intron_variant	1	1	1	1
TP380020	-50000_to_-40000	g8306.t1		del	frameshift_variant	1	1	0.989583	1
TP380020	-50000_to_-40000	g8307.t1	MGC80088 protein [Brugia malayi]	del	frameshift_variant	1	1	1	1
TP380020	-40000_to_-30000
TP380020	-40000_to_-30000	g8309.t1	immunoglobulin i-set domain containing protein [Ascaris suum]	del	frameshift_variant	1	0.92	1	1
TP380020	-40000_to_-30000	g8309.t1	immunoglobulin i-set domain containing protein [Ascaris suum]	del	frameshift_variant	1	1	1	1
TP380020	-40000_to_-30000	g8309.t1	immunoglobulin i-set domain containing protein [Ascaris suum]	del	frameshift_variant	1	0.944444	1	1
TP380020	-40000_to_-30000	g8309.t1	immunoglobulin i-set domain containing protein [Ascaris suum]	snp	splice_acceptor_variant&intron_variant	1	1	1	1
TP380020	-40000_to_-30000	g8309.t1	immunoglobulin i-set domain containing protein [Ascaris suum]	snp	splice_donor_variant&intron_variant	1	1	1	1
TP380020	-40000_to_-30000	g8309.t1	immunoglobulin i-set domain containing protein [Ascaris suum]	snp	splice_acceptor_variant&intron_variant	1	1	1	1
TP380020	-40000_to_-30000	g8309.t1	immunoglobulin i-set domain containing protein [Ascaris suum]	del	frameshift_variant	1	1	1	0.818182
TP380020	-40000_to_-30000	g8310.t1	Casein kinase I isoform gamma-1 [Toxocara canis]	del,snp	frameshift_variant	1	1	1	1
TP380020	-30000_to_-20000
TP380020	-30000_to_-20000	g8310.t1	Casein kinase I isoform gamma-1 [Toxocara canis]	ins	frameshift_variant	1	1	1	1
TP380020	-30000_to_-20000	g8310.t1	Casein kinase I isoform gamma-1 [Toxocara canis]	ins	frameshift_variant	1	1	1	1
TP380020	-30000_to_-20000	g8310.t1	Casein kinase I isoform gamma-1 [Toxocara canis]	del,snp	frameshift_variant	1	1	1	1
TP380020	-30000_to_-20000	g8310.t1	Casein kinase I isoform gamma-1 [Toxocara canis]	del,snp	stop_gained&disruptive_inframe_deletion&splice_region_variant	1	1	1	1
TP380020	-30000_to_-20000	g8310.t1	Casein kinase I isoform gamma-1 [Toxocara canis]	del	frameshift_variant	1	1	1	1
TP380020	-30000_to_-20000	g8310.t1	Casein kinase I isoform gamma-1 [Toxocara canis]	snp	stop_gained	1	1	1	1
TP380020	-30000_to_-20000	g8310.t1	Casein kinase I isoform gamma-1 [Toxocara canis]	del	frameshift_variant	1	1	1	1
TP380020	-30000_to_-20000	g8311.t1	GPI ethanolamine phosphate transferase 3, partial [Trichinella papuae]	ins	frameshift_variant	1	1	1	1
TP380020	-30000_to_-20000	g8311.t1	GPI ethanolamine phosphate transferase 3, partial [Trichinella papuae]	snp	stop_gained	1	1	1	1
TP380020	-30000_to_-20000	g8311.t1	GPI ethanolamine phosphate transferase 3, partial [Trichinella papuae]	del	frameshift_variant	1	1	1	1
TP380020	-30000_to_-20000	g8311.t1	GPI ethanolamine phosphate transferase 3, partial [Trichinella papuae]	del	frameshift_variant	1	0.945946	1	1
TP380020	-20000_to_-10000
TP380020	-20000_to_-10000	g7287.t1	Pc13g00710 [Penicillium rubens Wisconsin 54-1255]	del,snp	frameshift_variant	1	0.969388	0.960938	1
TP380020	-20000_to_-10000	g7287.t1	Pc13g00710 [Penicillium rubens Wisconsin 54-1255]	del	frameshift_variant	1	1	1	1
TP380020	-20000_to_-10000	g7287.t1	Pc13g00710 [Penicillium rubens Wisconsin 54-1255]	del	frameshift_variant	1	1	1	1
TP380020	-10000_to_0
TP380020	-10000_to_0	g7287.t1	Pc13g00710 [Penicillium rubens Wisconsin 54-1255]	del	frameshift_variant	1	1	1	1
TP380020	-10000_to_0	g7287.t1	Pc13g00710 [Penicillium rubens Wisconsin 54-1255]	snp	stop_lost&splice_region_variant	1	0.989247	0.979058	1
TP380020	-10000_to_0	g7288.t1		complex	frameshift_variant&missense_variant	1	1	1	1
TP380020	-10000_to_0	g7288.t1		del	frameshift_variant	1	1	1	1
TP380020	-10000_to_0	g7288.t1		del	frameshift_variant	1	1	1	1
TP380020	-10000_to_0	g7289.t1		snp	start_lost	0.594595	0.635593	0.566929	0.75
TP380020	-10000_to_0	g7289.t1		del,ins,ins	frameshift_variant	0.645833	0.879518	0.691429	1
TP380020	-10000_to_0	g7289.t1		ins	frameshift_variant	1	1	1	1
TP380020	-10000_to_0	g7289.t1		del	frameshift_variant	1	1	1	1
TP380020	-10000_to_0	g7289.t1		del	frameshift_variant	1	1	1	1
TP380020	-10000_to_0	g7289.t1		snp	stop_lost&splice_region_variant	1	1	1	1
TP380020	-10000_to_0	g8312.t1		snp	stop_gained	1	0.981818	0.825397	1
TP380020	-10000_to_0	g8312.t1		del	frameshift_variant	0.333333	1	0.8	0
TP380020	0_to_10000
TP380020	0_to_10000	g7290.t1		complex,del	frameshift_variant&splice_donor_variant&splice_region_variant&intron_variant	0.431373	0.636364	0.631579	0.444444
TP380020	0_to_10000	g7290.t1		complex,mnp	frameshift_variant&missense_variant	1	1	1	1
TP380020	0_to_10000	g7290.t1		complex,del,snp	frameshift_variant	0.938776	0.6	0.5	1
TP380020	0_to_10000	g7290.t1		ins	frameshift_variant	1	1	1	1
TP380020	0_to_10000	g7290.t1		del	frameshift_variant	1	1	1	1
TP380020	0_to_10000	g7290.t1		del	frameshift_variant	0.791667	0.903226	0.684211	1
TP380020	0_to_10000	g7290.t1		complex,mnp,snp	frameshift_variant&missense_variant	1	1	1	1
TP380020	0_to_10000	g7290.t1		complex,snp	splice_acceptor_variant&missense_variant&splice_region_variant&intron_variant	1	1	1	1
TP380020	0_to_10000	g8312.t1		complex,snp	frameshift_variant&missense_variant	0.766667	0.807692	0.71831	1
TP380020	10000_to_20000
TP380020	10000_to_20000	g7291.t1	carboxypeptidase [Eupolyphaga sinensis]	del	frameshift_variant	1	1	1	0
TP380020	10000_to_20000	g7291.t1	carboxypeptidase [Eupolyphaga sinensis]	complex,snp	stop_gained	1	1	1	1
TP380020	10000_to_20000	g7291.t1	carboxypeptidase [Eupolyphaga sinensis]	snp	stop_gained	1	0.945946	1	1
TP380020	10000_to_20000	g8313.t1	Cell Division Cycle related [Caenorhabditis elegans]	del,snp	frameshift_variant	1	0.923077	1	1
TP380020	10000_to_20000	g8313.t1	Cell Division Cycle related [Caenorhabditis elegans]	del,snp	frameshift_variant	1	1	1	1
TP380020	20000_to_30000
TP380020	20000_to_30000	g8314.t3	Homeobox protein ceh-6 [Toxocara canis]	del	frameshift_variant	1	1	1	0
TP380020	20000_to_30000	g8314.t3	Homeobox protein ceh-6 [Toxocara canis]	snp	stop_gained	1	1	1	0.333333
TP380020	20000_to_30000	g8314.t3	Homeobox protein ceh-6 [Toxocara canis]	del	frameshift_variant	1	0.909091	1	1
TP380020	20000_to_30000	g8314.t3	Homeobox protein ceh-6 [Toxocara canis]	del	frameshift_variant	1	0.866667	1	0
TP380020	20000_to_30000	g8314.t3	Homeobox protein ceh-6 [Toxocara canis]	del	frameshift_variant	1	1	1	1
TP380020	20000_to_30000	g8314.t3	Homeobox protein ceh-6 [Toxocara canis]	ins	frameshift_variant	1	0.851852	1	1
TP380020	20000_to_30000	g8315.t1	Cell death abnormality protein 12 [Toxocara canis]	snp	splice_acceptor_variant&intron_variant	1	1	1	1
TP380020	20000_to_30000	g8315.t1	Cell death abnormality protein 12 [Toxocara canis]	del	frameshift_variant	1	1	1	1
TP380020	20000_to_30000	g8315.t1	Cell death abnormality protein 12 [Toxocara canis]	snp	stop_gained	1	1	1	1
TP380020	20000_to_30000	g8315.t1	Cell death abnormality protein 12 [Toxocara canis]	snp	splice_donor_variant&intron_variant	1	1	1	1
TP380020	30000_to_40000
TP380020	30000_to_40000	g7292.t1		snp	start_lost	0.818182	1	1	1
TP380020	30000_to_40000	g8315.t1	Cell death abnormality protein 12 [Toxocara canis]	snp	splice_donor_variant&intron_variant	1	1	1	1
TP380020	30000_to_40000	g8315.t1	Cell death abnormality protein 12 [Toxocara canis]	del	frameshift_variant	1	1	1	1
TP380020	30000_to_40000	g8316.t1		del,snp,snp	frameshift_variant	0.948718	1	1	1
TP380020	30000_to_40000	g8316.t1		del	frameshift_variant	1	1	1	1
TP380020	30000_to_40000	g8316.t1		snp	stop_gained	0.925926	1	1	1
TP380020	30000_to_40000	g8316.t1		complex	frameshift_variant&stop_lost&missense_variant&splice_region_variant	0	1	1	0
TP380020	30000_to_40000	g8317.t1	6-phosphogluconate dehydrogenase, decarboxylating [Caenorhabditis elegans]	snp	stop_lost&splice_region_variant	1	1	1	1
TP380020	30000_to_40000	g8317.t1	6-phosphogluconate dehydrogenase, decarboxylating [Caenorhabditis elegans]	del	frameshift_variant	1	1	1	1
TP380020	30000_to_40000	g8317.t1	6-phosphogluconate dehydrogenase, decarboxylating [Caenorhabditis elegans]	del	frameshift_variant	1	1	1	1
TP380020	30000_to_40000	g8317.t1	6-phosphogluconate dehydrogenase, decarboxylating [Caenorhabditis elegans]	snp	splice_donor_variant&intron_variant	1	1	1	1
TP380020	30000_to_40000	g8317.t1	6-phosphogluconate dehydrogenase, decarboxylating [Caenorhabditis elegans]	del	frameshift_variant	1	1	1	1
TP380020	30000_to_40000	g8317.t1	6-phosphogluconate dehydrogenase, decarboxylating [Caenorhabditis elegans]	complex	frameshift_variant&missense_variant	1	1	1	1
TP380020	30000_to_40000	g8317.t1	6-phosphogluconate dehydrogenase, decarboxylating [Caenorhabditis elegans]	ins	frameshift_variant	1	1	1	1
TP380020	30000_to_40000	g8317.t1	6-phosphogluconate dehydrogenase, decarboxylating [Caenorhabditis elegans]	ins	frameshift_variant	1	1	1	1
TP380020	30000_to_40000	g8318.t1	Lamin-1 [Toxocara canis]	ins	frameshift_variant&stop_gained	1	1	1	1
TP380020	30000_to_40000	g8318.t1	Lamin-1 [Toxocara canis]	snp	stop_gained	1	1	1	1
TP380020	30000_to_40000	g8318.t1	Lamin-1 [Toxocara canis]	complex	splice_acceptor_variant&missense_variant&splice_region_variant&intron_variant	1	1	1	1
TP380020	30000_to_40000	g8318.t1	Lamin-1 [Toxocara canis]	snp	splice_donor_variant&intron_variant	1	1	1	1
TP380020	30000_to_40000	g8318.t1	Lamin-1 [Toxocara canis]	del	frameshift_variant	1	1	1	1
TP380020	30000_to_40000	g8318.t1	Lamin-1 [Toxocara canis]	snp	stop_gained	1	1	1	1
TP380020	40000_to_50000
TP380020	40000_to_50000	g7293.t1		complex,snp	splice_acceptor_variant&splice_region_variant&intron_variant	1	1	1	1
TP380020	40000_to_50000	g7293.t1		del	frameshift_variant&splice_region_variant	1	1	1	1
TP380020	40000_to_50000	g7293.t1		ins	frameshift_variant	1	1	1	1
TP380020	40000_to_50000	g8319.t1	5 -amp-activated protein kinase subunit beta-2 [Ascaris suum]	del	frameshift_variant	1	1	1	1
TP380020	40000_to_50000	g8319.t1	5 -amp-activated protein kinase subunit beta-2 [Ascaris suum]	del	frameshift_variant	1	1	1	1
TP380020	40000_to_50000	g8320.t1	Exocyst complex component 2 [Toxocara canis]	del	frameshift_variant	1	1	1	1
TP380020	40000_to_50000	g8320.t1	Exocyst complex component 2 [Toxocara canis]	snp	stop_gained	1	1	1	1
TP380020	40000_to_50000	g8320.t1	Exocyst complex component 2 [Toxocara canis]	snp	splice_acceptor_variant&intron_variant	1	1	1	1
TP380020	40000_to_50000	g8320.t1	Exocyst complex component 2 [Toxocara canis]	snp	splice_acceptor_variant&intron_variant	1	1	1	1
TP380020	40000_to_50000	g8320.t1	Exocyst complex component 2 [Toxocara canis]	snp	stop_gained	0.939394	1	1	1
TP380020	40000_to_50000	g8320.t1	Exocyst complex component 2 [Toxocara canis]	ins,mnp	frameshift_variant	1	1	1	1
TP380020	40000_to_50000	g8320.t1	Exocyst complex component 2 [Toxocara canis]	del	frameshift_variant	0.921569	1	1	1
TP380020	40000_to_50000	g8320.t1	Exocyst complex component 2 [Toxocara canis]	complex	splice_acceptor_variant&splice_region_variant&intron_variant	1	1	1	1
TP	position	Gene	Info	Type	TypeExtended	IL4	KS2	ON1	ON34
TP380188	-50000_to_-40000
TP380188	-40000_to_-30000
TP380188	-30000_to_-20000
TP380188	-20000_to_-10000
TP380188	-20000_to_-10000	g2282.t1		ins	frameshift_variant	1	0	0	0
TP380188	-10000_to_0
TP380188	-10000_to_0	g2283.t1	MH2 domain-containing protein [Loa loa]	complex	splice_donor_variant&splice_region_variant&intron_variant	1	1	1	1
TP380188	-10000_to_0	g2283.t1	MH2 domain-containing protein [Loa loa]	del	frameshift_variant	1	1	1	1
TP380188	-10000_to_0	g2283.t1	MH2 domain-containing protein [Loa loa]	snp	splice_donor_variant&intron_variant	1	1	1	1
TP380188	-10000_to_0	g2283.t1	MH2 domain-containing protein [Loa loa]	snp	splice_acceptor_variant&intron_variant	0.541667	0.212121	0.189189	0
TP380188	-10000_to_0	g2283.t1	MH2 domain-containing protein [Loa loa]	ins	frameshift_variant	1	1	1	1
TP380188	-10000_to_0	g2283.t1	MH2 domain-containing protein [Loa loa]	snp	stop_gained	1	1	1	1
TP380188	-10000_to_0	g2283.t1	MH2 domain-containing protein [Loa loa]	del	frameshift_variant	1	1	1	1
TP380188	0_to_10000
TP380188	0_to_10000	g2284.t1		snp	stop_gained	0.887097	1	0.777778	1
TP380188	0_to_10000	g2284.t1		complex,del	frameshift_variant&synonymous_variant	0.9	1	0.810127	1
TP380188	0_to_10000	g2284.t1		del,ins	frameshift_variant	0.5	0.466667	0.261538	0
TP380188	0_to_10000	g2284.t1		complex	stop_gained	0.954545	1	0.880952	1
TP380188	0_to_10000	g2284.t1		ins,ins	frameshift_variant	0.952941	1	0.903846	1
TP380188	0_to_10000	g2284.t1		complex,snp	splice_donor_variant&missense_variant&splice_region_variant&intron_variant	0.932692	0.84	0.846154	0.636364
TP380188	0_to_10000	g2284.t1		complex,snp	splice_acceptor_variant&splice_region_variant&synonymous_variant&intron_variant	0.951613	1	0.895652	1
TP380188	0_to_10000	g2284.t1		del	frameshift_variant	1	0.944444	1	1
TP380188	0_to_10000	g2284.t1		del	frameshift_variant	1	1	1	1
TP380188	0_to_10000	g2285.t1	60s ribosome subunit biogenesis protein nip7-like protein [Ascaris suum]	ins	frameshift_variant&splice_region_variant	1	1	1	1
TP380188	10000_to_20000
TP380188	10000_to_20000	g2285.t1	60s ribosome subunit biogenesis protein nip7-like protein [Ascaris suum]	complex	splice_donor_variant&intron_variant	1	1	1	1
TP380188	10000_to_20000	g2286.t1	Cytidylyltransferase family protein [Brugia malayi]	del	splice_acceptor_variant&intron_variant	1	1	1	1
TP380188	10000_to_20000	g2286.t1	Cytidylyltransferase family protein [Brugia malayi]	mnp,snp,snp	stop_gained	0.954545	1	0.666667	0
TP380188	10000_to_20000	g2286.t1	Cytidylyltransferase family protein [Brugia malayi]	snp	stop_gained	1	1	1	0
TP380188	10000_to_20000	g2287.t1	Cytochrome b-c1 complex subunit 2, mitochondrial [Strongyloides ratti]	snp	stop_gained	1	1	1	1
TP380188	10000_to_20000	g2287.t1	Cytochrome b-c1 complex subunit 2, mitochondrial [Strongyloides ratti]	del,snp	frameshift_variant	0.925926	1	1	1
TP380188	10000_to_20000	g2287.t1	Cytochrome b-c1 complex subunit 2, mitochondrial [Strongyloides ratti]	complex,snp	splice_donor_variant&missense_variant&splice_region_variant&intron_variant	0	0.0322581	0	0
TP380188	10000_to_20000	g2287.t1	Cytochrome b-c1 complex subunit 2, mitochondrial [Strongyloides ratti]	del	frameshift_variant	1	0.9375	1	1
TP380188	10000_to_20000	g2287.t1	Cytochrome b-c1 complex subunit 2, mitochondrial [Strongyloides ratti]	ins	frameshift_variant	1	1	1	1
TP380188	20000_to_30000
TP380188	20000_to_30000	g2287.t1	Cytochrome b-c1 complex subunit 2, mitochondrial [Strongyloides ratti]	snp	stop_gained	1	1	1	1
TP380188	20000_to_30000	g2287.t1	Cytochrome b-c1 complex subunit 2, mitochondrial [Strongyloides ratti]	ins	frameshift_variant	1	1	1	1
TP380188	20000_to_30000	g2288.t1	Cleavage polyadenylation specificity factor domain containing protein [Haemonchus contortus]	ins	frameshift_variant	0	0	0	0
TP380188	20000_to_30000	g2288.t1	Cleavage polyadenylation specificity factor domain containing protein [Haemonchus contortus]	ins	frameshift_variant	0.925926	1	1	1
TP380188	20000_to_30000	g2288.t1	Cleavage polyadenylation specificity factor domain containing protein [Haemonchus contortus]	snp	stop_gained&splice_region_variant	1	1	1	1
TP380188	20000_to_30000	g2288.t1	Cleavage polyadenylation specificity factor domain containing protein [Haemonchus contortus]	del	splice_donor_variant&intron_variant	0	0	0	0
TP380188	20000_to_30000	g2288.t1	Cleavage polyadenylation specificity factor domain containing protein [Haemonchus contortus]	del	frameshift_variant	1	0.916667	1	1
TP380188	30000_to_40000
TP380188	30000_to_40000	g2291.t1	Ubiquitin-conjugating enzyme E2 G2, partial [Toxocara canis]	complex,ins	frameshift_variant	0	0	0	0
TP380188	40000_to_50000
TP	position	Gene	Info	Type	TypeExtended	IL4	KS2	ON1	ON34
TP66981	-50000_to_-40000
TP66981	-40000_to_-30000
TP66981	-30000_to_-20000
TP66981	-20000_to_-10000
TP66981	-20000_to_-10000	g8392.t1	Glycine receptor subunit beta-type 4 [Toxocara canis]	del,del	frameshift_variant&splice_donor_variant&splice_region_variant&intron_variant	1	1	1	1
TP66981	-10000_to_0
TP66981	0_to_10000
TP66981	0_to_10000	g8394.t1		del	frameshift_variant	1	1	1	1
TP66981	0_to_10000	g8394.t1		del	frameshift_variant	1	1	1	1
TP66981	0_to_10000	g8394.t1		snp	stop_gained	1	1	1	0.666667
TP66981	0_to_10000	g8396.t1	putative rrna-processing protein ebp2-like protein [Ascaris suum]	del	frameshift_variant	1	1	1	0
TP66981	10000_to_20000
TP66981	10000_to_20000	g8397.t1	putative aquaporin-9 [Dictyocaulus viviparus]	del	frameshift_variant	1	1	1	1
TP66981	10000_to_20000	g8399.t1	Lipoamide acyltransferase component of branched-chain alpha-keto acid dehydrogenase complex, mitochondrial [Strongyloides ratti]	complex,ins,snp	splice_donor_variant&intron_variant	1	1	1	1
TP66981	10000_to_20000	g8399.t1	Lipoamide acyltransferase component of branched-chain alpha-keto acid dehydrogenase complex, mitochondrial [Strongyloides ratti]	ins	frameshift_variant	1	1	1	1
TP66981	10000_to_20000	g8399.t1	Lipoamide acyltransferase component of branched-chain alpha-keto acid dehydrogenase complex, mitochondrial [Strongyloides ratti]	del	frameshift_variant&start_lost	1	1	1	1
TP66981	10000_to_20000	g8400.t1		del	frameshift_variant	1	1	1	1
TP66981	10000_to_20000	g8400.t1		complex,mnp,snp	frameshift_variant&missense_variant	1	1	1	0.909091
TP66981	10000_to_20000	g8400.t1		del,snp	frameshift_variant	0.649215	0.62	0.684507	0.833333
TP66981	20000_to_30000
TP66981	20000_to_30000	g8400.t1		snp	splice_donor_variant&intron_variant	0.72093	0.57265	0.790625	1
TP66981	20000_to_30000	g8401.t1		del	frameshift_variant	1	1	1	0.882353
TP66981	20000_to_30000	g8401.t1		snp	stop_gained&splice_region_variant	1	1	1	1
TP66981	20000_to_30000	g8401.t1		complex,snp	splice_acceptor_variant&splice_region_variant&intron_variant	1	1	1	1
TP66981	20000_to_30000	g8402.t1	Lipoamide acyltransferase component of branched-chain alpha-keto acid dehydrogenase complex, mitochondrial [Strongyloides ratti]	ins	frameshift_variant	1	1	1	1
TP66981	30000_to_40000
TP66981	30000_to_40000	g8402.t1	Lipoamide acyltransferase component of branched-chain alpha-keto acid dehydrogenase complex, mitochondrial [Strongyloides ratti]	snp	stop_gained	1	1	1	1
TP66981	30000_to_40000	g8403.t1	Ski oncogene [Toxocara canis]	complex,snp	splice_acceptor_variant&splice_region_variant&intron_variant	0.8	0.487179	0.839286	1
TP66981	30000_to_40000	g8404.t1	Trafficking protein particle complex subunit 8 [Strongyloides ratti]	del	frameshift_variant	0.948718	1	1	1
TP66981	30000_to_40000	g8404.t1	Trafficking protein particle complex subunit 8 [Strongyloides ratti]	snp	stop_gained	1	1	1	1
TP66981	30000_to_40000	g8404.t1	Trafficking protein particle complex subunit 8 [Strongyloides ratti]	snp	stop_gained	1	1	0.928571	1
TP66981	30000_to_40000	g8405.t1	Twik (KCNK-like) family of potassium channels, alpha subunit 5 [Brugia malayi]	del	frameshift_variant	1	1	1	0
TP66981	30000_to_40000	g8405.t1	Twik (KCNK-like) family of potassium channels, alpha subunit 5 [Brugia malayi]	del	frameshift_variant	1	1	1	1
TP66981	30000_to_40000	g8405.t1	Twik (KCNK-like) family of potassium channels, alpha subunit 5 [Brugia malayi]	ins	splice_donor_variant&intron_variant	1	1	1	1
TP66981	40000_to_50000
TP66981	40000_to_50000	g8406.t1	Protein CBG13342 [Caenorhabditis briggsae]	snp	start_lost	1	1	1	0
TP66981	40000_to_50000	g8407.t1	Hyaluronidase-1 [Toxocara canis]	complex	frameshift_variant&stop_gained	1	1	1	1
TP66981	40000_to_50000	g8408.t1	UDP-glucuronosyltransferase 3A1 [Toxocara canis]	ins	frameshift_variant	1	1	1	1
TP66981	40000_to_50000	g8408.t1	UDP-glucuronosyltransferase 3A1 [Toxocara canis]	del	frameshift_variant	1	1	1	1
TP66981	40000_to_50000	g8408.t1	UDP-glucuronosyltransferase 3A1 [Toxocara canis]	complex	frameshift_variant&missense_variant	1	1	1	1
TP66981	40000_to_50000	g8408.t1	UDP-glucuronosyltransferase 3A1 [Toxocara canis]	complex	frameshift_variant&missense_variant	1	1	1	1
TP66981	40000_to_50000	g8408.t1	UDP-glucuronosyltransferase 3A1 [Toxocara canis]	snp	splice_acceptor_variant&intron_variant	1	1	1	1
TP66981	40000_to_50000	g8408.t1	UDP-glucuronosyltransferase 3A1 [Toxocara canis]	del	frameshift_variant	0.923077	1	1	1
TP66981	40000_to_50000	g8408.t1	UDP-glucuronosyltransferase 3A1 [Toxocara canis]	complex	splice_acceptor_variant&missense_variant&splice_region_variant&intron_variant	1	1	1	1
TP66981	40000_to_50000	g8408.t1	UDP-glucuronosyltransferase 3A1 [Toxocara canis]	complex,snp	frameshift_variant&synonymous_variant	1	1	1	1
TP66981	40000_to_50000	g8408.t1	UDP-glucuronosyltransferase 3A1 [Toxocara canis]	complex	frameshift_variant&missense_variant	1	1	1	1
TP	position	Gene	Info	Type	TypeExtended	IL4	KS2	ON1	ON34
TP77825	-50000_to_-40000
TP77825	-40000_to_-30000
TP77825	-40000_to_-30000	g5120.t1		snp	stop_gained	1	1	1	1
TP77825	-40000_to_-30000	g5120.t1		snp	splice_donor_variant&intron_variant	1	1	1	1
TP77825	-40000_to_-30000	g5120.t1		del	frameshift_variant	1	1	1	0
TP77825	-40000_to_-30000	g5120.t1		mnp,snp	splice_donor_variant&splice_region_variant&intron_variant	1	1	1	0
TP77825	-40000_to_-30000	g5121.t1		complex,mnp,snp	frameshift_variant&synonymous_variant	1	1	1	0
TP77825	-40000_to_-30000	g5121.t1		del,snp	frameshift_variant&splice_acceptor_variant&splice_region_variant&intron_variant	0.935484	1	1	0
TP77825	-40000_to_-30000	g5121.t1		ins	frameshift_variant	1	0.6	1	0
TP77825	-40000_to_-30000	g5121.t1		complex,complex,snp	stop_gained	0.9375	0.529412	1	0
TP77825	-40000_to_-30000	g5121.t1		complex,complex,complex	stop_gained	1	0.882353	1	0
TP77825	-40000_to_-30000	g5121.t1		del	frameshift_variant&stop_lost&splice_region_variant	1	1	1	0
TP77825	-30000_to_-20000
TP77825	-30000_to_-20000	g5122.t1		complex	frameshift_variant&synonymous_variant	1	0	1	0
TP77825	-20000_to_-10000
TP77825	-10000_to_0
TP77825	-10000_to_0	g5123.t1		snp	stop_gained	1	1	1	1
TP77825	-10000_to_0	g5123.t1		del	frameshift_variant	1	1	1	1
TP77825	-10000_to_0	g5123.t1		del	frameshift_variant	1	1	1	1
TP77825	0_to_10000
TP77825	0_to_10000	g7987.t1		complex,snp	frameshift_variant&missense_variant	0.688679	0.738095	0.652174	0.5
TP77825	0_to_10000	g7987.t1		mnp	splice_acceptor_variant&intron_variant	1	1	1	0
TP77825	0_to_10000	g7987.t1		complex	frameshift_variant&missense_variant	0.901961	0.807692	0.956522	0
TP77825	0_to_10000	g7987.t1		del	frameshift_variant	1	0.84	1	0
TP77825	0_to_10000	g7987.t1		complex	frameshift_variant&stop_lost&splice_region_variant&stop_retained_variant	1	0.888889	1	0
TP77825	0_to_10000	g5124.t1		ins	frameshift_variant	1	1	1	1
TP77825	0_to_10000	g5124.t1		complex,complex,snp	frameshift_variant&missense_variant	1	0.888889	1	1
TP77825	0_to_10000	g5124.t1		snp,snp	splice_donor_variant&intron_variant	0	0.0416667	0.0111111	0
TP77825	0_to_10000	g5124.t1		snp	splice_acceptor_variant&intron_variant	0.954545	0.958333	0.88785	1
TP77825	0_to_10000	g5124.t1		complex,snp	stop_gained&missense_variant&inframe_insertion	0.780822	0.76	0.863158	0.625
TP77825	0_to_10000	g5124.t1		complex	stop_gained	0.970588	0.96	0.89011	1
TP77825	0_to_10000	g5125.t1		del	frameshift_variant	0	0	0	0
TP77825	0_to_10000	g5125.t1		complex,snp	start_lost	0.988095	1	1	1
TP77825	10000_to_20000
TP77825	10000_to_20000	g7988.t1		ins,snp	frameshift_variant	0.645161	0.272727	0.625	0
TP77825	10000_to_20000	g7988.t1		del,ins,ins	frameshift_variant	0	0	0	0
TP77825	10000_to_20000	g7988.t1		ins,snp	frameshift_variant	0	0	0	0
TP77825	10000_to_20000	g7988.t1		complex	splice_donor_variant&splice_region_variant&intron_variant	1	1	1	0
TP77825	10000_to_20000	g7988.t1		del	frameshift_variant	0.909091	0.75	1	0
TP77825	10000_to_20000	g7989.t1	golgin subfamily alpha member 2 [Ascaris suum]	snp	splice_donor_variant&intron_variant	1	1	1	1
TP77825	10000_to_20000	g7989.t1	golgin subfamily alpha member 2 [Ascaris suum]	del	frameshift_variant	1	1	1	1
TP77825	10000_to_20000	g7989.t1	golgin subfamily alpha member 2 [Ascaris suum]	snp	stop_gained&splice_region_variant	1	1	1	1
TP77825	10000_to_20000	g7989.t1	golgin subfamily alpha member 2 [Ascaris suum]	snp	stop_gained	1	1	1	1
TP77825	20000_to_30000
TP77825	20000_to_30000	g7989.t1	golgin subfamily alpha member 2 [Ascaris suum]	snp	splice_acceptor_variant&intron_variant	0.948718	1	1	1
TP77825	30000_to_40000
TP77825	30000_to_40000	g7991.t1		complex	splice_donor_variant&splice_region_variant&intron_variant	0.621622	0.269231	0.306122	0
TP77825	30000_to_40000	g7992.t1		del	frameshift_variant	1	1	1	0
TP77825	30000_to_40000	g7992.t1		complex	splice_donor_variant&splice_region_variant&synonymous_variant&intron_variant	0.535714	0.131579	0.153846	0
TP77825	30000_to_40000	g7992.t1		snp	stop_gained	1	0.928571	1	1
TP77825	40000_to_50000
TP77825	40000_to_50000	g7993.t1		del	frameshift_variant	0.978723	0.923077	1	1
TP77825	40000_to_50000	g7993.t1		del	frameshift_variant	1	1	1	1
TP	position	Gene	Info	Type	TypeExtended	IL4	KS2	ON1	ON34
//Output from Render_individual_contig (processing)	-50000_to_-40000
//Output from Render_individual_contig (processing)	-40000_to_-30000
//Output from Render_individual_contig (processing)	-30000_to_-20000
//Output from Render_individual_contig (processing)	-20000_to_-10000
//Output from Render_individual_contig (processing)	-10000_to_0
//Output from Render_individual_contig (processing)	0_to_10000
//Output from Render_individual_contig (processing)	10000_to_20000
//Output from Render_individual_contig (processing)	20000_to_30000
//Output from Render_individual_contig (processing)	30000_to_40000
//Output from Render_individual_contig (processing)	40000_to_50000

## Sheet: Suppl. table 7
Supplementary table 7. Number of reads of each alleles at loci containing SNPs in 64 populations of soybean cyst nematode.			Population name
			#1 = allele #1 and #2 =allele #2, the numbers in each collumn are the number of reads that were sequenced for each population at this SNP
TP	Sequence of Allele #1	Sequence of Allele #2	IA1_#1	IA1_#2	IA6_#1	IA6_#2	IA8_#1	IA8_#2	IA9_#1	IA9_#2	IL1_#1	IL1_#2	IL2_#1	IL2_#2	IL3_#1	IL3_#2	IL4_#1	IL4_#2	IL5_#1	IL5_#2	IL7_#1	IL7_#2	IN1_#1	IN1_#2	KS1_#1	KS1_#2	KS2_#1	KS2_#2	MD1_#1	MD1_#2	MI1_#1	MI1_#2	MN1_#1	MN1_#2	MN2_#1	MN2_#2	MN3_#1	MN3_#2	MN4_#1	MN4_#2	MN5_#1	MN5_#2	MN6_#1	MN6_#2	MO1_#1	MO1_#2	MO4_#1	MO4_#2	MO5_#1
TP16	TGCAGAAAAAAACTGAAGAGGTGAAACTGCTCAAAACCCGACCAACAGAGCAAAACGGACACAG	TGCAGAAAAAAACTGAAGAGGTGAAACTGCTCAAAACCCGACCAACAGAGCAAAACGGAAACAG	10	10	25	34	23	9	44	14	18	21	17	6	18	3	16	7	50	24	37	32	46	19	35	30	33	16	23	1	37	25	18	25	17	8	28	5	NA	NA	NA	NA	NA	NA	10	12	24	28	16
TP128	TGCAGAAAAACTTGGAATAAAATTGCTTAGTCCTGAGGTGGCTGGTGTTATCGGAATTAGTGGT	TGCAGAAAAAATTGGAATAAAATTGCTTAGTCCTGAGGTGGCTGGTGTTATCGGAATTAGTGGT	40	2	54	0	52	4	138	5	58	6	43	0	43	0	59	0	88	16	107	0	149	0	67	1	41	0	41	0	77	0	69	0	30	0	49	2	56	0	61	1	30	0	39	0	51	0	32
TP367	TGCAGAAAAATGGAGAAATTCAGTACCAACTTTGTCCACTTCAGTCCCTGGCGAATAACTCGCC	TGCAGAAAAATGGAGAAATTCAGTACCAACTTTGTCCACTTCAGTCCCAGGCGAATAACTCGCC	42	6	5	43	39	66	50	64	19	58	36	52	11	11	15	55	33	116	20	40	65	125	30	48	32	58	36	29	52	40	18	48	23	24	78	50	96	36	107	25	15	16	3	30	26	75	16
TP467	TGCAGAAAACAGAGGAGCAATTCGAGTTTGGATTATTTTGGAATTTGTTTGGCCTTGTGCACTT	TGCAGAAAACAGAGGAGCAATTCGAGTTTGGATTATTTGGGAATTTGTTTGGCCTTGTGCACTT	29	5	20	16	NA	NA	32	28	15	7	39	0	NA	NA	26	5	100	0	9	26	41	21	35	0	25	9	20	15	21	26	20	2	13	10	54	28	12	14	6	37	28	12	11	27	38	0	NA
TP675	TGCAGAAAACTCGGTTTGACGACGACTGGAATGGACCCAGCACCATGTCCACTTTGCTGCTTGT	TGCAGAAAACTCGGTTTGACGACGACTGGAATGGACCCAGCACCATGTCCACTTTGCTGCTTGG	0	29	1	46	0	43	0	85	0	26	NA	NA	0	20	0	39	0	116	0	52	0	71	0	41	0	46	0	30	0	66	0	56	0	33	1	69	1	77	1	95	0	41	NA	NA	0	44	0
TP865	TGCAGAAAAGGAGTTGCTGAAAAGGTTCGAAAGGGCACAAAAGGACATGCCAAGCAGCAATTGT	TGCAGAAAAGGAGTTGCTGAAAAGGTGCGAAAGGGCACAAAAGGACATGCCAAGCAGCAATTGT	0	70	0	73	0	56	3	65	3	33	0	57	NA	NA	0	45	0	152	4	40	17	114	0	112	0	78	14	10	4	40	0	59	0	53	0	56	NA	NA	0	0	0	28	0	52	0	52	0
TP892	TGCAGAAAAGGTGCACGCGGACACAAAAAGGACAAAAGGGACGACAACGAAGGAGGGGAACGGA	TGCAGAAAAGGCGCACGCGGACACAAAAAGGACAAAAGGGACGACAACGAAGGAGGGGAACGGA	29	24	32	0	54	0	70	10	66	10	81	0	27	0	47	0	148	0	4	38	57	5	103	0	64	0	43	24	42	13	83	0	34	0	24	20	7	26	12	38	37	14	39	0	57	0	18
TP901	TGCAGAAAAGGCGCCGATCACTTAATGTGGCCACAAATAATGCGAAGGGATTCATCGAAAAACA	TGCAGAAAAGGCGCCGATCACTTAACGTGGCCACAAATAATGCGAAGGGATTCATCGAAAAACA	45	9	16	29	55	3	86	6	37	3	42	18	16	18	14	8	78	3	1	63	70	33	51	17	60	0	22	0	81	4	69	0	0	0	83	0	72	0	50	0	37	0	NA	NA	56	2	35
TP1305	TGCAGAAAATGGCAACTGAAGCGTGCTCAAAAAGTACACTTCAGTACCAGGCGAATACCGCGTC	TGCAGAAAATGGCAACTGAAGCGTGCTCAAAAAGTACACTTCAGTACCAGGCGAATACCGAGTC	76	2	53	3	61	4	142	1	48	2	52	4	39	16	55	13	137	4	77	37	97	26	58	1	65	4	42	2	129	0	81	0	52	4	62	22	54	19	51	26	36	9	28	5	47	5	26
TP1529	TGCAGAAAATTGGCCAAAGTTTTTGAGCAATCAATCGCAAAAGACGCGAAAAAAAGCGTGGGAA	TGCAGAAAATTGGCCAAAGTTTTTGAGCAATCAATCGCAAAAGACGCGAAAAAAAGCCTGGGAA	NA	NA	45	0	26	0	34	0	32	0	36	0	NA	NA	NA	NA	77	0	34	0	26	1	23	0	28	0	21	1	34	4	NA	NA	44	0	53	0	28	8	30	0	24	0	21	0	43	0	38
TP1530	TGCAGAAAATTGGCCAAAGTTTTTGAGCAATCAATCGCAAAAGACGCGAAAAAAGCGTGGGAAT	TGCAGAAAATTGGCCAAAGTTTTTGAGCAATCAATCGCAAAAGACGCGAAAAAAGCCTGGGAAT	41	0	63	0	50	0	79	10	62	0	110	0	27	0	24	0	145	0	73	6	79	16	94	0	46	0	50	1	57	6	63	0	118	0	107	0	34	17	85	0	36	0	42	0	57	0	68
TP1539	TGCAGAAAATTGTTCGACTCCGTTGTGTAGAAGTTGCGAGTGTCCTGTTTGCGTGGGAAATGTA	TGCAGAAAATTGTTCGACTCCGTTGTGTAGAAGTCGCGAGTGTCCTGTTTGCGTGGGAAATGTA	120	12	282	0	240	47	350	4	195	3	187	24	84	39	135	19	390	159	231	4	317	0	111	9	149	5	134	2	294	3	216	0	181	30	221	13	149	0	127	0	188	10	150	23	245	21	122
TP1617	TGCAGAAACAAACCGATCAGTGTGTATGTAAAGAAGAAGAAGAAGGTGATGTGCTGTTGTTGTC	TGCAGAAACAAACCGATCAGTGTGTATGTAAAGAAGAAGAAGAAGGTGATGTGCTGTTGTTGTA	45	2	44	4	47	1	56	7	46	4	32	4	35	1	31	2	112	11	56	7	91	8	54	3	36	9	24	3	72	10	51	6	27	3	41	3	53	3	55	4	21	1	26	3	42	5	29
TP1681	TGCAGAAACACCAGCAACAGTTGCTGATCAGTACGAACAAAGTAGAGGAGGCCAATAACAGCGG	TGCAGAAACACCAGCAACAGTTGCTGATCAGTACGAACAAAGTAGAGGAGACCAATAACAGCGG	0	99	0	23	0	116	22	85	0	112	0	160	0	45	4	52	5	190	85	10	14	144	0	197	33	51	18	34	9	104	17	76	0	86	9	114	35	28	NA	NA	0	87	0	50	0	105	27
TP1721	TGCAGAAACACTTGGAATTCGAAGGGTCGGAAATGTGCCCAAAGGTTGAGAAAATGGCGGTAAT	TGCAGAAACACTTGGAATTCGAAGGGTCGAAAATGTGCCCAAAGGTTGAGAAAATGGCGGTAAT	32	45	21	41	72	44	104	24	28	40	59	41	35	6	64	13	108	115	48	19	65	53	62	75	41	48	24	2	120	22	7	59	47	47	82	33	94	19	96	0	48	3	23	7	63	15	24
TP1738	TGCAGAAACACTTTCTCTCCAGCAATTTGTTCCAACGAATTGAGCATTTTTGTGCCCTTTAGGG	TGCAGAAACACTTTCTCTCCAGCAATTTGTTCCAACGAATTGAGCATTTTTGTGCCCTTTAGGA	33	0	63	1	51	0	48	0	41	0	46	0	32	0	25	0	94	0	43	1	45	0	47	0	25	0	40	0	49	0	48	0	22	0	59	1	69	0	37	0	37	0	32	0	55	0	39
TP2248	TGCAGAAACGGAACCGCGTAAAGTGGCCGAATTGAACGAGGAATTAACAGCCAGCGGATTGGCG	TGCAGAAACGGAACCGCGCAAAGTGGCCGAATTGAACGAGGAATTAACAGCCAGCGGATTGGCG	0	48	0	76	8	45	0	115	31	65	0	67	0	44	0	57	0	157	0	103	0	100	0	104	0	61	8	80	35	78	3	40	1	45	12	90	16	80	4	71	4	65	0	34	0	108	0
TP2268	TGCAGAAACGGCCAAGCGGTCAATTCTCGCCGAGCAGCATTAGCTTGGGTAGCGGTGGCGGCGG	TGCAGAAACGGCCAAGCGGTCAATTCTCGCCGAGCAGCATTAGCTTGGGTAGCGGTGGCGGCGC	NA	NA	48	0	21	0	36	0	NA	NA	32	0	26	0	NA	NA	65	0	24	0	41	0	32	0	24	0	NA	NA	29	0	31	0	37	0	27	0	33	0	35	0	27	0	NA	NA	33	0	24
TP2340	TGCAGAAACGTGCTGAGGAGTACAGAAAGAAACGAGAAAATGTGGCAGTAAGAAAATCTGCACA	TGCAGAAACGTGCTGAGGAGTACAGAAAGAAACGAGAAAATGTAGCAGTAAGAAAATCTGCACA	16	30	20	23	5	41	25	61	3	30	0	43	0	25	0	25	3	61	24	17	36	35	0	60	1	30	17	17	22	21	0	53	23	22	15	23	7	23	NA	NA	NA	NA	NA	NA	4	47	2
TP2673	TGCAGAAAGAAACATTTGTTATTGCCAGCCGCACTAATTAATTAATTTACCTTATCCGCACTTC	TGCAGAAAGAAACATTTGTTATTGCCAGCCCCACTAATTAATTAATTTACCTTATCCGCACTTC	59	7	20	11	26	35	13	78	29	30	11	72	8	23	19	23	10	105	0	66	31	40	66	6	10	50	8	52	9	88	74	8	16	46	49	54	10	43	15	50	4	26	18	4	36	31	15
TP2747	TGCAGAAAGAAGTGGATTTTGGCGACATTTGTTGGTGGATAATGGAACGATGCCCAATCATTGG	TGCAGAAAGAAGTGGATTTTGGCGACATTTGTTGGTGGATAATGGAACGATGCCCAATCAGTGG	0	84	4	62	0	64	15	77	0	61	0	91	0	67	0	36	0	125	0	50	0	120	0	97	0	55	0	43	20	65	0	59	18	38	34	61	15	50	35	34	11	34	0	37	0	114	0
TP2761	TGCAGAAAGAATGTGCAGAGAAGCGAAAAGACGGAGGTGACTGGGTGATCTATGCTGGGACGGT	TGCAGAAAGAATGTGCAGAGAAGCAAAAAGACGGAGGTGACTGGGTGATCTATGCTGGGACGGT	26	0	35	0	35	0	98	0	NA	NA	44	0	21	0	24	0	80	10	NA	NA	53	0	31	0	32	0	NA	NA	53	0	37	0	37	0	32	0	34	0	27	0	NA	NA	NA	NA	42	0	33
TP2787	TGCAGAAAGAATGTGCAGAGAAGCGAAAAGACGGCGGTGACTGGGTGATCTACGCTGGGACGGT	TGCAGAAAGAATGTGCAGAGAAGCGAAAAGACGGCGGAGACTGGGTGATCTACGCTGGGACGGT	55	28	35	45	67	17	82	33	66	18	70	39	23	24	47	27	215	59	63	47	132	36	111	33	60	24	20	23	81	49	63	37	50	17	88	49	25	46	72	22	75	16	34	20	75	26	59
TP2921	TGCAGAAAGATGCCAAAACGGTGGACATTGTGGACAAATGCAGGCTGACCAGTCCGAGTTGGTT	TGCAGAAAGAGGCCAAAACGGTGGACATTGTGGACAAATGCAGGCTGACCAGTCCGAGTTGGTT	0	122	0	45	0	178	0	256	0	130	9	142	6	26	29	131	0	406	0	131	0	171	0	153	3	85	0	127	0	150	4	100	13	215	6	135	17	139	0	134	0	57	0	128	28	77	3
TP3033	TGCAGAAAGCAGCATCAGAAATGGAGGATGGCCACGAGTTTTATCCATCTCCCCTCCCATCTTT	TGCAGAAAGCAGCATCAGAAATGGAGGATGGCCACGAGTTTTATCCATCTCCCCTCCCATCTTG	49	0	33	0	92	0	71	1	68	3	77	1	NA	NA	46	1	200	3	69	0	93	0	73	2	56	1	51	1	68	2	69	0	41	1	100	1	45	0	55	3	72	2	54	0	69	2	52
TP3408	TGCAGAAAGGCGCTTGCTGGGAAAAATTTGAAATTTTGGCCTGATTCCTTAACAGAATTGTGCC	TGCAGAAAGGCGCTTGCTGGGAAAAATTGGAAATTTTGGCCTGATTCCTTAACAGAATTGTGCC	17	23	NA	NA	21	25	25	54	17	25	18	25	8	18	NA	NA	47	37	0	27	31	32	15	29	15	22	6	20	15	26	19	21	0	20	20	36	0	47	6	49	5	16	10	18	10	19	12
TP3684	TGCAGAAAGTTCGGTGGCTCATACATTGGGTTATACTAAGAAATAAGAATGATCGAATTGGTTT	TGCAGAAAGTTCGGTGGCTCATACATTGGGTTATACTAACAAATAAGAATGATCGAATTGGTTT	0	68	1	35	11	86	0	104	9	48	6	51	17	19	32	40	121	80	6	70	0	128	21	79	3	93	1	47	0	156	10	56	0	109	5	119	0	100	0	93	9	71	8	50	15	95	7
TP4017	TGCAGAAGTCGAAGACGGACAAGCAGCAGCAATGGCCAGGGGGGCATTGTGCCGTCGTGGAGTG	TGCAGAAATCGAAGACGGACAAGCAGCAGCAATGGCCAGGGGGGCATTGTGCCGTCGTGGAGTG	90	11	NA	NA	70	35	38	91	53	68	110	45	31	19	22	54	192	105	73	55	47	104	51	121	0	111	17	32	55	101	64	14	40	13	24	106	47	52	4	86	14	43	12	52	58	38	39
TP4114	TGCAGAAATCTGTTCGTAGCTCAGTATAAAAGTTGAATACGAAGTGACCAGAATTGATCCATTC	TGCAGAAATCTGTTCGTAGCTCAGCATAAAAGTTGAATACGAAGTGACCAGAATTGATCCATTC	66	5	12	48	20	49	8	67	22	30	19	62	21	29	0	26	74	32	10	33	33	36	54	48	14	39	0	63	27	57	19	35	30	27	5	114	0	48	4	52	9	23	19	18	35	37	25
TP4170	TGCAGAAATGAGGAAAGTGCCGCTGCACCCTTGGGAAGTGCCAGAAGTGCTTGGCAAAGGCTTC	TGCAGAAATGAGGAAAGTGCCGCTGCACCATTGGGAAGTGCCAGAAGTGCTTGGCAAAGGCTTC	66	2	33	5	71	0	77	0	85	2	53	4	45	1	65	0	163	6	55	0	158	10	77	13	69	0	49	0	85	2	88	0	48	0	70	10	49	0	31	2	30	0	39	0	64	7	58
TP4306	TGCAGACATGGCCTAAATTTTGATATTGAATTAAATATGTACTAGTGAATGAATCAATGACCAT	TGCAGAAATGGCCTAAATTTTGATATTGAATTAAATATGTACTAGTGAATGAATCAATGACCAT	67	40	77	13	67	104	30	82	49	158	52	101	19	20	43	60	188	89	99	79	63	139	136	45	39	48	78	14	32	66	3	188	16	159	60	105	100	25	125	1	34	62	7	96	64	77	21
TP4311	TGCAGAAATGGCCTAAATTTTGGTATTGAATTAAATATGTACTGAATCAATGACCATGTAAATG	TGCAGAAATGGCCTAAATTTTGGTATTGAATTAAATATGTACTGAATCAATGACCATGTAAAGG	38	38	31	28	54	74	96	42	73	24	74	21	26	9	46	39	153	64	19	12	64	36	87	58	62	35	47	33	49	24	41	0	68	28	71	55	52	42	75	60	27	21	33	5	51	59	29
TP4482	TGCAGAAATTCACTGACAATGCTTCTCAATTTGACGATATAATCCTAAATAATAATCATTAATT	TGCAGAAATTCACTAACAATGCTTCTCAATTTGACGATATAATCCTAAATAATAATCATTAATT	12	28	4	31	21	35	86	35	17	19	17	16	10	25	33	13	92	15	2	20	62	38	29	5	23	47	44	17	72	34	4	21	55	6	161	43	122	41	134	40	21	18	NA	NA	10	17	NA
TP4499	TGCAGAAATTCATCACTTATTTGGACAGCCGACCCTCAACGAGTCAACAGCAGCATCAGAACGA	TGCAGAAATTCATCACTTATTTGGACAGCCGACCCTCAACGAGTCAACAGCAGCAGCAGAACGA	29	1	14	9	35	7	88	3	50	3	23	0	26	6	28	0	70	4	65	9	103	8	46	4	NA	NA	49	0	60	1	57	24	36	12	73	3	58	21	79	0	32	2	19	6	45	7	25
TP4515	TGCAGAAATTCATCGGCATTCAATGGGCGGGTGTTCGCGTTGTTCATCCTAAACTGTGCAATTA	TGCAGAAATTCATCGGCATTCAACGGGCGGGTGTTCGCGTTGTTCATCCTAAACTGTGCAATTA	18	30	22	37	0	65	5	88	18	42	12	77	NA	NA	2	28	7	165	0	92	3	57	3	42	22	11	4	45	2	62	28	24	0	31	17	88	4	65	0	51	4	36	17	27	23	55	17
TP4837	TGCAGAAATTGTGGATTAATTCTCAGAAAAATGGCTATCTCTTTTAGACAATTTTCTATCTCGT	TGCAGAAATTGTGAATTAATTCTCAGAAAAATGGCTATCTCTTTTAGACAATTTTCTATCTCGT	3	96	NA	NA	NA	NA	1	28	10	186	4	150	8	151	8	51	46	758	29	367	9	244	42	719	11	230	4	43	0	22	2	76	9	186	7	181	4	85	1	42	5	117	4	114	20	415	4
TP4850	TGCAGAAATTGTGGATTAATTCTCAGAAAAATGGCTATCTCTTTTTAAGGACAATTTTCTATCT	TGCAGAAATTGTGAATTAATTCTCAGAAAAATGGCTATCTCTTTTTAAGGACAATTTTCTATCT	1	57	NA	NA	NA	NA	NA	NA	8	76	4	83	4	66	2	35	16	414	3	150	5	110	8	215	9	149	2	24	NA	NA	0	40	2	95	0	89	5	55	0	24	2	76	6	68	8	309	0
TP4961	TGCAGAAATTTGACGACTGGTACAGCAACAACCTATACCAAAAATTCGACCTCAAAGAAAAATT	TGCAGAAATTTGACGACTGGTACAGCAACAACCTATACCAAAAATTCGACCTCAAAGAAAAAAT	52	2	23	2	107	8	170	9	44	4	89	7	76	5	54	6	111	10	143	8	251	12	84	3	38	6	81	12	77	4	35	2	86	3	109	5	119	11	149	5	92	5	56	5	44	5	103
TP5082	TGCAGAACAAATTTGCCGCGATCAGACAGAAGGGAGCCAAAATGCTGAAGGAATGGACGGATCG	TGCAGAACAAATTTGCCGCGATCAGACAGAAGGGAGCCAAAATGCTGAAGGAATGGACGGACCG	6	35	39	16	30	24	71	9	20	20	25	5	15	6	NA	NA	12	76	61	3	26	35	4	49	13	17	22	10	35	10	3	25	22	14	41	14	11	17	54	17	19	19	4	23	20	44	NA
TP5169	TGCAGAACAACCTTCTGCATCAAAGATGGTTCCTAACTGCGCAAGAGCGGACGGCCACATTCAT	TGCAGAACAACCTTCTGCATCAAAGACGGTTCCTAACTGCGCAAGAGCGGACGGCCACATTCAT	20	125	42	130	17	164	23	238	12	219	6	252	10	79	3	133	61	338	26	213	14	264	4	202	8	153	6	145	12	194	15	229	0	181	10	86	19	99	2	27	5	104	1	89	14	196	2
TP5469	TGCAGAACAATTACAAAAAATAACGACAGCTCCACAAATTCAAGACGTAAAACCACAGCAACAA	TGCAGAACAATTACAAAAAATAACGAAAGCTCCACAAATTCAAGACGTAAAACCACAGCAACAA	40	0	13	16	45	0	78	0	47	2	56	3	33	0	57	0	93	0	25	16	77	0	43	0	33	0	40	1	77	0	80	0	47	0	75	0	35	0	59	0	NA	NA	NA	NA	41	0	32
TP5480	TGCAGAACACAAAGGTGGTCATCGGCTCGTCCGCGCTTCGCGTTTGCATTTGGCTGTATGTGCA	TGCAGAACACAAAGGTGGTCATCGGCTCGTCAGCGCTTCGCGTTTGCATTTGGCTGTATGTGCA	3	23	2	45	7	38	21	42	0	26	0	37	NA	NA	5	40	0	61	0	48	31	31	0	45	7	25	0	27	12	46	2	28	18	23	38	43	11	56	50	9	0	36	NA	NA	11	37	NA
TP5750	TGCAGAACACTCTCAGCAGGCGACGATTCGCGGACTGACAAAGCGACGAGGCGAATTAACCCTT	TGCAGAACACTCTCAGCAGGCGACGATTCGCGGACTGACAAAGCGACGAGGCGAACTAACCCTT	52	10	6	57	0	101	51	82	10	68	1	81	4	30	7	32	6	199	0	54	42	77	0	67	0	48	3	45	22	57	43	27	16	27	0	107	0	63	0	65	12	34	0	34	1	68	14
TP6000	TGCAGAACAGTACATGCCTTGGGTGGGTCGCCAGTTGGCGATGCTGTACACCTCGTAGGGGATG	TGCAGAACAGTACATGCCTTGGATGGGTCGCCAGTTGGCGATGCTGTACACCTCGTAGGGGATG	129	0	87	3	112	0	255	38	99	7	132	2	55	19	83	17	201	145	124	0	196	0	191	0	130	0	60	3	207	28	94	18	81	54	229	0	139	39	191	0	147	24	76	7	133	69	70
TP6138	TGCAGAACATCCCAATCATTGATTCGGAGGTACGCCGTTTATATGAAGCGGTAGGACGAATGGC	TGCAGAACATCCCAATCATTGATTCGGAGGTACGCCGTTTATATGAAGCGGTAGGACGAATGCC	138	0	193	1	116	0	203	1	161	0	124	1	68	0	72	0	285	0	118	0	159	0	95	1	70	0	86	1	199	0	86	0	128	0	208	1	140	0	254	2	107	0	54	1	120	0	59
TP6590	TGCAGAACCAATACGGCGCAAAACAGTGGGCCCAATTAGCACCGCTTTATTAGCTAGGCTCACA	TGCAGAACCAATACGGCGCAAAACAGTGGGCCCAATTAGCACCGCTTTATTAGCCAGGCTCACA	0	81	34	78	13	111	36	76	14	86	6	86	0	57	0	84	1	253	6	116	66	82	0	159	19	85	17	40	42	152	0	117	0	128	3	188	39	88	26	104	5	158	18	61	50	107	3
TP6676	TGCAGAACCACGATCAGCCACCACTTAGTGGCACACGAACCACCACCATCAGTGGCATGGGCAT	TGCAGAACCACGATCAGCCACCACTGAGTGGCACACGAACCACCACCATCAGTGGCATGGGCAT	NA	NA	5	20	NA	NA	NA	NA	13	25	NA	NA	6	14	NA	NA	47	18	12	16	12	26	26	14	3	29	NA	NA	NA	NA	1	59	21	12	13	16	19	7	26	5	25	6	NA	NA	9	25	NA
TP7450	TGCAGAACCGTCCAAAATTACCAAGTGCCTTTGGCATGGCTTCACACGTTTTGTCTCCACTCTT	TGCAGAACCGTCCAAAATTACCAAGTGCCTTTGGCATGGCTTCACAAGTTTTGTCTCCACTCTT	109	8	79	5	111	43	97	44	56	32	69	17	22	42	25	55	128	119	90	17	135	28	31	95	100	28	60	17	86	43	57	27	86	26	87	39	57	26	88	0	64	41	68	46	89	15	56
TP9430	TGCAGAACGGAAACCATGCAAAATATGCGGTGAATTGGCGTATCTCATTCGCGGTCATCTGCTT	TGCAGAACGGAAACCATGCAAAATATGCGGCGAATTGGCGTATCTCATTCGCGGTCATCTGCTT	25	17	12	12	43	6	41	33	28	18	14	27	22	9	22	8	5	130	26	10	44	16	32	7	14	16	26	4	32	9	49	15	NA	NA	27	53	18	24	12	46	12	27	36	0	32	3	NA
TP9825	TGCAGAACGGCTTAAATTCTCTTACCGTTCGAGAGTCGCGCACTGACGGGCGACTCATTTCCAG	TGCAGAACGGCTTAAATTCTCTTACCGTCCGAGAGTCGCGCACTGACGGGCGACTCATTTCCAG	0	68	2	118	0	144	0	266	2	148	0	116	0	96	0	113	0	360	0	126	0	181	21	120	0	106	13	72	0	198	0	133	0	101	4	173	46	114	31	98	0	152	0	81	0	217	0
TP10665	TGCAGAACTCCTTCAGGACGAAGCCAACGCTTTCGGGAACAAACGCAAGAGGGAATTTTGGTTC	TGCAGAACTCCTTCAGGACGAAGCCAACGCCTTCGGGAACAAACGCAAGAGGGAATTTTGGTTC	15	22	2	22	18	25	13	114	6	45	19	38	11	26	0	27	74	68	27	43	29	78	0	59	0	80	12	47	14	40	4	37	2	43	10	61	28	57	22	24	9	37	0	49	0	79	16
TP11357	TGCAGAAGAAAACTGAAGAGGTGAACCTGCTCAAAAAGCGACCAGCAGTGGAAAACAAGGGCAA	TGCAGAAGAAAACTGAAGAGGTGAACCTGCTCAAAAACCGACCAGCAGTGGAAAACAAGGGCAA	183	23	378	0	353	1	301	0	237	7	273	0	140	0	232	0	499	66	199	0	396	13	373	20	256	0	98	0	231	0	265	35	198	0	248	0	74	7	107	0	136	0	180	22	352	15	121
TP11463	TGCAGCAGAAATTACCAATCTCACCAATTCTTCGGCTTTTCAATCACATGGACACAATCTCAGC	TGCAGAAGAAATTACCAATCTCACCAATTCTTCGGCTTTTCAATCACATGGACACAATCTCAGC	0	48	0	65	0	40	0	77	0	51	0	51	2	22	0	25	0	94	0	32	0	44	0	45	0	29	3	38	0	46	1	44	0	46	5	54	17	28	7	45	7	21	0	36	0	47	0
TP11471	TGCAGAAGAACAAAGTCGTCGTTGAAAATGTGCTTCACACATGACACATTGTATTCAGTGATGT	TGCAGAAGAACAAAGTCGTCGTTGAAAATGTGCTTCACACATGACACATTGTATTCAGTGATGG	0	129	0	100	0	133	0	89	0	116	0	121	0	48	0	70	2	408	1	105	0	128	0	104	0	100	0	43	0	104	0	98	1	101	0	136	1	94	0	99	0	49	1	66	1	180	0
TP11714	TGCAGAAGAAGCGCAACGCTTTGTACCGTGATTTTAAAAAGAACAAAAGTGAGTTGTGTTTTGG	TGCAGAAGAAGCGCAACGCTTTGTACCGTGATTTTAAAAAGAACAAAAGTGAGTTGGGTTTTGG	30	0	41	0	NA	NA	50	0	26	2	21	4	NA	NA	NA	NA	94	4	21	0	41	3	30	1	22	0	28	0	36	1	47	0	25	8	29	0	26	0	NA	NA	25	0	NA	NA	34	0	NA
TP12354	TGCAGAAGACGGGTCAGCTTCGAGTCTCTGTAGGGAATGTGTGTGGATTTGCCGTCCACCAACG	TGCAGAAGACGGGTCAGCTTCGAGTCTCTGTAGGGAATGTGCGTGGATTTGCCGTCCACCAACG	36	28	48	37	23	87	48	77	30	87	29	54	5	19	16	41	25	120	21	44	83	36	47	17	17	40	20	44	54	26	41	59	39	48	10	68	27	71	7	100	8	39	20	15	32	97	17
TP12392	TGCAGAAGACTCCCGAGGTGCTCAAGCTGTACACCACAGTGATCACCGATCAGCTCAATGCAGC	TGCAGAAGACTCCCGAGGTGCTCAAGCAGTACACCACAGTGATCACCGATCAGCTCAATGCAGC	1	171	0	246	0	247	16	411	0	267	0	172	0	191	0	169	4	495	0	251	4	351	0	229	0	166	2	189	38	375	0	294	0	242	0	352	12	431	0	278	0	179	0	109	0	291	0
TP12454	TGCAGGAGAGCATGACATAGTAACCACGTCTGACACTCCTGTGTCGTCGAAGCCACACCGAACA	TGCAGAAGAGCATGACATAGTAACCACGTCTGACACTCCTGTGTCGTCGAAGCCACACCGAACA	NA	NA	109	32	64	4	126	13	19	25	35	50	NA	NA	49	21	60	6	26	18	80	22	32	5	39	0	45	3	91	19	43	74	62	7	88	0	46	0	28	0	21	5	15	10	51	11	49
TP12586	TGCAGAAGAGGCAGCTGTTGTGCGTTGGGCGTTGTCGTGATGTTGTTACGACGCGAGCCCGTCC	TGCAGAAGAGGCAGCTGTTGTGCGTTAGGCGTTGTCGTGATGTTGTTACGACGCGAGCCCGTCC	28	0	119	2	124	0	87	151	72	0	127	0	56	0	45	0	221	0	59	0	62	157	82	0	179	0	108	158	99	75	61	0	46	8	225	4	125	9	191	11	99	12	67	0	159	0	41
TP13311	TGCAGAAGCAAAAGCACCAGTGAAGACTGAACTTCACTCTTGGCCGAAAACGGATGGTCCATGG	TGCAGAAGCAAAAGCACCAGTGAAGACTGAACTTCACTCTTGGCCGAAAACGGATGGTCCATGA	56	0	80	0	143	2	108	0	63	0	31	0	34	0	70	0	168	0	152	0	81	2	49	0	66	0	28	0	63	0	51	0	85	0	102	1	37	0	54	0	56	0	46	0	112	0	40
TP13468	TGCAGAAGCACGAAGGCTTTTGTTATGGATATGATAATTGGCAGTTGAAGCGATGTCCAATTGG	TGCAGAAGCACGAAGGCTTTTGTTATGGATATGATAATTGGCAGTTGAAGCGATGCCCAATTGG	55	0	40	0	62	0	64	2	74	12	83	0	31	0	22	0	108	0	NA	NA	64	39	65	0	32	0	NA	NA	30	0	49	0	29	0	76	0	51	0	NA	NA	55	0	43	0	34	0	56
TP14062	TGCAGAAGCCCGAGTTCACCGAACCTCTGAAGGACGTCAGCGTGCGGACGGAGGAAACGGTTGT	TGCAGAAGCCCGAGTTCACCGAACCTCTGAAGGACGTCAGCGTGCGGACGGAGGAAAAGGTTGT	NA	NA	30	0	35	0	23	24	25	1	31	0	NA	NA	27	0	85	0	2	25	33	27	21	0	29	0	19	2	14	16	59	2	NA	NA	31	0	12	11	32	0	35	0	24	0	44	0	NA
TP14449	TGCAGAAGCGCCAAAACCTGCTGGAGAAGCCGCAACTATACAACCAGCGGAAGAGCCGAAACCT	TGCAGAAGCGCCAAAACCTGCTGGAGAAGCCGCAACTATACAACCAGCGGAAGAGCCGAAACCG	35	2	59	7	55	9	68	9	36	4	NA	NA	NA	NA	NA	NA	32	1	38	10	111	7	18	4	32	5	24	6	39	2	0	0	63	4	48	12	35	4	15	6	30	0	NA	NA	20	1	NA
TP14684	TGCAGAAGCGCTTCAAATATTATGAGAGGAAGCAAAAGTTGGAAGAGACGGCGGCACGGAAAAA	TGCAGAAGCGCTTCAAATATTATGAGAAGAAGCAAAAGTTGGAAGAGACGGCGGCACGGAAAAA	9	52	3	19	21	78	13	33	16	84	7	129	7	31	17	19	2	21	16	62	5	131	13	54	11	40	8	63	12	63	7	27	21	62	13	101	0	75	0	60	7	25	NA	NA	31	62	2
TP15250	TGCAGAAGCTGAAGCGGAGGAGGAGGAGGACGACGACGACACCCCCCACTATTCGCCGTTCGCC	TGCAGAAGCTGAAGCGGAGGAGGAGGACGACGACGACGACACCCCCCACTATTCGCCGTTCGCC	31	45	22	32	43	60	3	99	13	54	0	122	25	22	33	34	73	172	0	59	32	72	5	85	20	30	0	39	8	110	8	56	16	39	10	80	0	42	0	75	24	50	14	26	23	84	7
TP15614	TGCAGAAGCTGTCATTGGATAGAAATCAGTTGCACACTGTGCCAGTGAAGGCAATCAATGAATT	TGCAGAAGCTGTCATTGGATAGAAATCAGTTGCACACTGTGCCAGTGAAGGCAACCAATGAATT	24	12	NA	NA	23	20	44	13	36	15	20	18	17	7	8	29	24	80	39	11	45	9	38	24	24	14	42	3	43	11	5	18	19	32	36	0	59	4	35	4	18	14	14	16	25	27	NA
TP15976	TGCAGAAGGACAGTCTGTGCAGGCCCATCTTCCTTGAACTGCTTGAAGTTGTCGGGGCTAGAAA	TGCAGAAGGACAGTCTGTGCAGGCCCATCTTCCTTGAACTGCTTGAAGTTGTCGGGACTAGAAA	14	31	27	3	75	24	73	0	52	2	32	28	26	0	NA	NA	102	0	42	6	73	8	27	1	25	14	16	6	83	0	28	15	43	10	19	46	28	20	20	30	22	10	29	6	42	8	25
TP16307	TGCAGAAGGATCAAGAACGCGTCAAGGTGGAGCGGTACCTGGACGCCTGCGAGCGGAAGCCACG	TGCAGAAGGATCAAGAACGCGTCAAGGTGGAGCGGTACCTGGACGCCTGCGAGCGGAACCCACG	0	99	1	74	0	139	0	150	25	94	0	223	3	65	0	46	0	477	0	60	7	61	0	78	24	66	29	66	0	97	3	50	0	196	43	70	12	42	97	38	24	106	2	51	0	164	30
TP16493	TGCAGAAGGCCCAGCAATTTGTGTGTCCTAAATTCAAAAAGGGAAATCGACTTTTTCCAAAACG	TGCAGAAGGCCCAGCAATTTGTGCGTCCTAAATTCAAAAAGGGAAATCGACTTTTTCCAAAACG	37	0	44	0	59	0	65	0	30	0	37	0	27	0	24	0	64	0	48	0	53	9	49	0	36	0	37	0	65	0	28	1	22	12	35	1	31	18	16	9	24	0	NA	NA	22	0	NA
TP16998	TGCAGAAGGCTGAGATATTCCACCACAACTTGGAGTCCTAAAAGGAAAAATTTGTTGGCACAAC	TGCAGAAGGCTGAGATATTCCACCACAACTTGGAGTCCTAAAAGGAAAAATTTGTTGGCACAAA	80	1	39	0	62	0	140	0	57	0	66	0	43	0	34	0	152	2	62	2	116	1	59	1	33	0	40	0	57	1	55	0	61	1	60	1	64	0	64	1	44	0	43	0	37	0	22
TP17489	TGCAGAAGGTCGTTGATCTGTTTGCCCTCCAACTGCTGTGCGGCGTGCTGTCTCTTTTTGTCAT	TGCAGAAGGTCGTTGATCTGTTTGCCATCCAACTGCTGTGCGGCGTGCTGTCTCTTTTTGTCAT	2	48	43	68	30	145	59	131	55	76	49	55	12	21	7	69	123	146	11	131	60	124	30	87	66	24	11	59	94	85	0	199	28	103	25	108	6	124	0	101	13	79	37	40	125	44	45
TP17720	TGCAGAAGGTGTGCAGCGTTTCGTCTGATAACCCTTCGGTGCGGGTCAATTGGCGCATCTTCCA	TGCAGAAGGTGTGCAGCGTTTCGTCTGATAACCCTTCGGTGCGGGTCAATTGGCGCATCGTCCA	8	49	16	55	35	0	53	14	40	0	35	0	NA	NA	NA	NA	58	0	67	0	52	37	41	1	36	0	39	12	41	11	43	0	40	0	102	0	41	9	70	9	39	0	36	0	42	0	20
TP17903	TGCAGAAGTACTCGCTTTTGGCTCCTCTTCTGGGGAAAGTTGTTCTCGCCTCCTTTCCTCTTTT	TGCAGAAGTACTCGCTTTTGGCTCCTCTTCTGGGGAAAGTTGTTCTAGCCTCCTTTCCTCTTTT	52	2	59	111	52	29	136	48	31	35	22	7	11	30	31	37	36	106	23	75	49	20	59	16	70	5	15	19	33	19	9	107	86	48	56	21	81	10	79	4	66	9	38	42	59	3	34
TP18222	TGCAGAAGTGCGTCTTCTAAGGTCGCGCGCAAATTCGTGCAGTTTTTCCTTGACAATGAAAGAG	TGCAGAAGTGCGTCTTCTAAGGTCGCGCGCAAATTCGTGCAGTTTTTCCTTGACAATGAAAGAA	47	8	40	4	48	7	81	1	28	14	49	4	27	0	44	0	143	0	33	44	71	20	50	0	50	5	11	13	69	0	44	15	53	6	16	65	1	78	0	40	42	17	35	14	46	18	18
TP18264	TGCAGAAGTGGCCGAGTTTGACGAGACACTGAACGGCGCTTCTACCAGCTACGACCTGAGAGAC	TGCAGAAGTGGCCGAATTTGACGAGACACTGAACGGCGCTTCTACCAGCTACGACCTGAGAGAC	0	21	3	37	0	63	19	45	3	44	0	57	0	25	NA	NA	0	84	0	59	7	46	0	47	0	40	14	16	18	32	0	38	2	42	15	42	35	35	10	31	7	18	0	33	0	61	0
TP18580	TGCAGAAGTTGTTTATGCAGCGAAGTTGGCACTTTGGAGAGATTGGCCATGGGAGAGACATGGG	TGCAGAAGTTGTTTATGCAGCGAAGTTGGCACTTTGGAGAGATTGGCCATGGGAGAGACATGGA	99	0	102	0	91	0	130	1	67	0	44	0	52	0	82	1	145	1	70	0	144	1	100	0	51	0	33	0	75	1	54	0	115	1	78	0	94	0	78	0	45	0	41	0	78	0	63
TP19017	TGCAGAATCAGCATGGCTTTGAGCTGGAAGTTGTCTGGGGATGTGAAATGAAGCAGCGTCTGCG	TGCAGAATCAGCATGGCTTTGAGCTGGAAGTTGTCTGGGGATGCGAAATGAAGCAGCGTCTGCG	8	174	18	262	23	141	13	356	9	227	30	218	11	121	8	104	47	416	0	195	16	373	6	298	20	200	2	199	9	340	12	203	0	247	6	368	2	222	0	248	5	211	5	111	28	223	15
TP19169	TGCAGAATCCTTGCTGGTAGTAACGGCAAAGGATGGGCTGTCGATGGGAATCGGCCGTCGCGTG	TGCAGAATCCCTGCTGGTAGTAACGGCAAAGGATGGGCTGTCGATGGGAATCGGCCGTCGCGTG	53	5	29	0	103	0	82	0	91	0	69	0	41	3	39	0	189	0	98	0	104	0	68	0	66	0	39	0	62	0	46	0	70	0	56	25	38	30	49	21	76	13	34	0	69	0	48
TP19412	TGCAGAATCGGATAACCACCAAGCATTGGACCTGAAGGAATTGATCGAAAAGAGGATGAAACGG	TGCAGAATCGGATAACCACCAAGCATTGGACCTGAAGGAATTGATCGAAAAGAGGATGAAACGA	49	21	24	0	75	10	94	16	66	18	78	12	23	15	43	11	34	70	50	10	65	20	59	15	35	7	25	12	98	27	30	29	57	1	59	39	49	20	40	14	37	4	22	5	71	11	21
TP19439	TGCAGAATCGGCAGCTTTGGTGCGTTGGGCGTTGTCGTGTTGTTGTTACGACGCGAGCCCGTCC	TGCAGAATCGGCAGCTTTGGTGCGTTGGGCGTTGTCGTGATGTTGTTACGACGCGAGCCCGTCC	335	89	128	163	47	99	96	570	334	409	178	287	144	153	233	357	853	741	401	255	98	641	514	438	178	261	169	192	31	497	23	52	316	587	50	345	4	368	24	361	142	374	28	264	51	188	95
TP19473	TGCAGAATCGGGCTCCACAAATTCGTGCTCCACCATTATTCTTTGCACTTGTTCTGGCGTGCTG	TGCAGAATCGGGCTCCACAAATTCGTGCTCCACCATTATTCTTTGAACTTGTTCTGGCGTGCTG	190	38	124	15	181	82	357	42	153	35	201	5	115	11	123	35	431	104	130	0	376	26	158	47	154	4	162	11	265	10	110	4	179	37	213	41	183	0	186	2	114	36	136	25	252	16	109
TP19487	TGCAGAATTGGTTACAAAAGCAAACACTCGTCCGTCGTTTATTTTCCAACTGTCCAATAATTTA	TGCAGAATCGGTTACAAAAGCAAACACTCGTCCGTCGTTTATTTTCCAACTGTCCAATAATTTA	9	59	NA	NA	7	62	10	75	19	34	9	36	18	8	3	22	22	109	8	51	20	60	8	54	10	19	3	22	6	45	11	71	30	47	19	52	7	17	NA	NA	6	20	5	16	20	61	11
TP19851	TGCAGAATGAATGATTGGTTGTGTGTACTCCAAACAATTTGGAAAAGGGAATGGTTTATTTAGA	TGCAGAATGAATGATTGGTTGTGTGTACTCCAAACAATTTGGAAAAGGGAATGGTTTATTTAAA	4	54	21	15	42	37	67	39	54	47	31	35	0	25	10	31	101	72	48	18	120	7	63	21	38	60	49	13	50	56	55	20	23	40	65	35	90	5	68	2	39	28	38	39	11	90	6
TP19967	TGCAGAATGATGAACATCGATTACGAGTCGGTCGGCTTTTACCAGGCGCACCCATTCGGCGCCT	TGCAGAATGATGAACATCGATTACGAGTCGGTCGGCTTTTACCAGGCGCACCCATTCGGCGCCC	210	0	90	1	267	3	276	4	254	1	186	1	86	2	131	1	418	8	266	3	284	0	231	0	150	2	150	3	207	4	242	2	227	2	299	1	217	1	173	0	151	2	137	3	255	3	142
TP20331	TGCAGCATGGCCCAAAGAAGGCACACACGGTGTGCATCGCCCACAACGGTGGAAAGTACGATTT	TGCAGAATGGCCCAAAGAAGGCACACACGGTGTGCATCGCCCACAACGGTGGAAAGTACGATTT	73	0	182	0	146	8	168	0	140	0	133	0	105	0	79	0	403	0	66	14	137	0	120	0	121	0	108	0	178	0	166	0	162	0	215	0	142	0	146	0	127	0	71	0	117	0	129
TP20395	TGCAGAATGGCTGTCTGCTGAGGACAACATTGGACCAGGGCAAGCAAAGGGCGGGGGTGGGGAT	TGCAGAATGGCTGTCTGCTGAGGACAACATTGGACCAGGGCAAGCAAAGGACGGGGGTGGGGAT	34	9	NA	NA	28	2	50	0	51	0	27	0	25	0	37	0	66	0	22	0	38	0	75	4	21	8	19	3	23	0	27	0	22	12	39	13	27	0	NA	NA	31	17	32	10	54	0	21
TP20463	TGCAGAATTGTGACGGAAAAACGGCATTGATGGCCGCGTGTTGGAAAGAAGCTTTTACAGTACT	TGCAGAATGGTGACGGAAAAACGGCATTGATGGCCGCGTGTTGGAAAGAAGCTTTTACAGTACT	95	0	70	0	79	3	95	48	68	17	89	4	69	0	21	0	244	0	92	0	70	28	53	18	60	0	37	5	85	27	17	45	124	0	147	6	61	7	115	0	49	0	33	20	102	13	25
TP20530	TGCAGAATGTCCCAAAAATCTATTTCTGATTTCATTTCCAAAGTTACATTTCAACAATCATCTT	TGCAGAATGTCCCAAAAATCTATTTCTGATTTCATTTCCAAAGTTACATTACAACAATCATCTT	NA	NA	13	17	13	38	62	23	11	30	16	15	NA	NA	12	16	88	42	27	12	24	13	23	60	5	16	66	14	42	6	15	16	19	19	52	5	75	16	74	4	28	7	NA	NA	12	17	9
TP20673	TGCAGAATGTTTGTCTTCTTTCGTAATTTCATTCCCTTTCACTTCCATCTTCTTTGAAAGGTCT	TGCAGAATGTTCGTCTTCTTTCGTAATTTCATTCCCTTTCACTTCCATCTTCTTTGAAAGGTCT	0	117	NA	NA	0	97	0	108	3	66	0	56	0	58	0	60	0	136	15	99	19	109	0	98	0	52	0	46	0	92	0	96	0	55	0	107	15	86	2	46	0	35	0	62	0	87	0
TP20709	TGCAGAATTAACCGCAGCACAAACGTAATTGCCTTGGTCCAATTGTCGAACATTGTCAATGATC	TGCAGAATTAACCGCAGCACAAACGTAATTGCCTTGGTCCAATTGCCGAACATTGTCAATGATC	47	0	52	0	71	0	121	14	82	0	47	0	42	0	32	0	160	0	59	13	74	0	81	0	55	0	32	0	120	1	59	0	70	0	122	0	44	0	62	0	28	0	34	0	49	0	57
TP20790	TGCAGAATTATTTCTTGGCCGCAAACCAAGAATTGACCTTGATCTCCTTCGCCCGTCTAAAAAT	TGCAGAATTATTTCTTGGCCGCAAACCAAGAATTGACCTTGATCTCCTTCGCCCGTCTAAAAAA	56	8	114	4	44	4	32	4	93	7	61	2	67	3	74	3	79	4	NA	NA	74	4	102	4	61	4	27	2	50	7	94	4	91	6	36	2	NA	NA	NA	NA	73	4	57	8	151	29	30
TP20875	TGCAGAATTCGACGATTTCGTGCTCAGGATATTCATCGGTGAACTGTCCCAAGTGTGGCCCTGT	TGCAGAATTCGACGATTTCGTGCTCAGGATATTCATCGGTGAACTGTCCCAAGTGTAGCCCTGT	197	2	258	5	252	2	165	21	265	22	162	2	176	3	128	0	248	1	180	6	310	39	231	28	192	32	74	4	159	16	224	6	123	12	176	11	24	0	NA	NA	181	25	126	18	234	17	127
TP21247	TGCAGAATTTGGCGCTGCCCACCTTCGTGCTGGAACGACGCTCTCTCCTCGAAATGTACGCCGA	TGCAGAATTTCGCGCTGCCCACCTTCGTGCTGGAACGACGCTCTCTCCTCGAAATGTACGCCGA	192	12	97	0	269	4	438	0	283	8	282	0	151	16	197	0	559	0	311	0	446	0	289	4	235	0	273	15	364	0	209	20	240	15	338	0	314	0	262	0	220	0	133	0	271	3	224
TP21723	TGCAGACAATCAACGCCCAACCACGGGTTTTGCGCTTCGATTTGTTTCGCTTTCAGTTCAGTGA	TGCAGACAATCAACGCCCAACCACGGGTTTTGCGCTTCGATTTGTTTCGCTTTCAGCTCAGTGA	46	0	76	0	59	3	80	13	49	0	38	0	21	0	52	0	131	0	56	0	45	17	56	5	66	0	48	16	54	45	70	0	34	0	94	0	32	26	57	5	35	7	34	0	49	0	26
TP21783	TGCAGGCAATGGCTGCCATTCAACGAATTTTTGCGTCGGAAAGCAGCGGAAGCAACAGCAACAT	TGCAGACAATGGCTGCCATTCAACGAATTTTTGCGTCGGAAAGCAGCGGAAGCAACAGCAACAT	0	46	1	42	0	62	51	38	8	63	3	38	5	39	2	29	64	25	1	63	5	97	6	34	15	39	5	17	37	33	29	15	4	43	38	56	3	59	5	66	13	7	15	18	18	66	12
TP21803	TGCAGACAATTAAGGATTTAATGGACCCATTTTGCAGCCCGCCCTTTAATTCGCGTGCCATTCC	TGCAGACAATTAAGGATTTAATGGACCCATTTTGCAGCCCGCCCCTTAATTCGCGTGCCATTCC	0	76	0	49	27	67	6	85	18	44	0	68	0	28	0	44	12	191	0	51	0	76	22	71	0	53	0	73	6	81	0	59	0	46	0	57	0	91	0	53	0	85	5	53	17	43	0
TP22045	TGCAGACACGAGAGAAGGGAGGAGATTAAAGCGAATGAAAAAACAATGTCTGGTTTAGGTGGTG	TGCAGACACGAGAGAAGGGAGGAGATTAAAGCGAACGAAAAAACAATGTCTGGTTTAGGTGGTG	71	3	70	5	79	0	65	41	57	3	73	0	49	0	45	0	122	0	24	31	77	32	59	0	44	2	11	28	50	26	53	0	83	22	82	32	49	15	8	68	49	0	46	0	88	0	53
TP22138	TGCAGGCACTCATTGAGCGACCGTTGCGCACCGAACTCCCGCACATTTGCCACTTGTCGGACGT	TGCAGACACTCATTGAGCGACCGTTGCGCACCGAACTCCCGCACATTTGCCACTTGTCGGACGT	NA	NA	16	14	59	0	105	75	54	3	75	0	41	6	58	0	142	0	63	0	97	32	65	0	64	7	93	20	44	31	NA	NA	54	9	111	21	70	55	114	55	45	6	53	0	61	0	98
TP22255	TGCAGACAGAAACGGCATTGCTTAACCAGAATGGGAAGCAATCATCCGTTTTGGGTTGTAGCCA	TGCAGACAGAAACGGCATTGCTTAACCAGAAGGGGAAGCAATCATCCGTTTTGGGTTGTAGCCA	24	43	39	41	103	20	100	13	60	41	22	50	23	31	40	10	60	137	15	52	78	17	58	38	46	43	29	22	60	18	44	30	51	4	62	7	32	7	49	19	32	13	20	25	22	52	10
TP22706	TGCAGACAGGTGGTCATCACCTAAAAACAGATAAAATCAAAATCAAATAAAATTCATGAATTGA	TGCAGACAGGTGGTCATCACCTAAAAACAGATAAAACCAAAATCAAATAAAATTCATGAATTGA	0	58	0	53	0	73	23	79	0	68	0	58	NA	NA	0	21	0	136	0	90	9	69	0	109	0	54	6	38	8	58	0	64	0	83	0	73	22	30	0	45	0	37	0	41	0	57	0
TP22823	TGCAGACAGTTTAGGCCGTCAAATGTTCCAATTATTTTCGAGAATCCATCATTCGGTGCTTGAT	TGCAGACAGTTTAGGCCATCAAATGTTCCAATTATTTTCGAGAATCCATCATTCGGTGCTTGAT	4	26	NA	NA	10	20	28	14	8	19	7	17	13	16	16	7	9	41	9	25	13	61	NA	NA	6	21	NA	NA	23	15	3	17	7	27	13	12	13	11	NA	NA	4	16	NA	NA	3	33	NA
TP22839	TGCAGACATAATGACCAACAACGCGGATGGGTCAGCACCAGCACTTCATTTGAGCTCAACGCAG	TGCAGACATAATGACCAACAACGCGGATGGGTCAGCACCAGCACTTCAATTGAGCTCAACGCAG	0	70	0	194	0	129	0	204	0	119	0	106	0	72	0	49	0	165	0	120	0	169	0	98	0	83	0	97	0	156	0	61	0	90	0	175	2	153	5	157	0	68	0	59	0	119	0
TP23005	TGCAGACATGGAAAGTGTTCGTCGTTACAATTCTTGAAATTAATTAGTTGGCTAATTAGCTAAT	TGCAGACATGGAAAGTGTTCGTCATTACAATTCTTGAAATTAATTAGTTGGCTAATTAGCTAAT	46	23	86	3	86	3	52	53	52	22	55	4	61	4	55	13	112	35	50	3	48	37	4	84	0	50	64	0	29	39	73	3	76	7	33	31	88	21	39	37	15	29	48	12	48	39	14
TP23263	TGCAGACCAACAACAAATCCAACGGCACTCGCATTGCTTTGGCAATTTCAAATGCAATTGGAAC	TGCAGACCAACAACAAATCCAACGGCACTCGCATTGCTTTGGCAATTTCAAAAGCAATTGGAAC	10	191	7	157	0	177	0	296	0	228	0	153	7	81	0	168	0	373	51	102	7	246	0	190	0	114	15	95	0	124	0	175	0	226	8	193	82	127	46	73	14	94	0	99	0	225	0
TP23476	TGCAGACCAAGAGCCGTCATAACATCGTGAATTTCGGCATCATTGTCGTATGTGCGTCCGCTAA	TGCAGACCAAGAGCCGTCATAACATCGTGAATTTCGGCATCATTGTCGTATATGCGTCCGCTAA	52	0	94	0	39	0	82	0	47	0	36	0	46	0	36	0	110	0	30	0	51	0	42	0	41	0	32	0	63	0	28	0	64	0	58	0	20	0	43	0	40	0	32	0	53	0	40
TP23477	TGCAGACCAAGAGCCGTCATAACATCGTGAATTTCGGCATCATTGTCGTATGTGGCGTCCGCTA	TGCAGACCAAGAGCCGTCATAACATCGTGAATTTCGGCATCATTGTCGTATATGGCGTCCGCTA	300	0	710	11	434	8	687	0	505	0	401	0	239	0	284	0	792	1	385	0	515	0	385	0	367	0	206	0	502	0	269	0	474	0	606	5	272	14	337	14	250	0	193	0	445	0	277
TP23504	TGCAGACCAAGATCCTCAAAATTTCTTTACGTCCTCCTGACATTTTCGTTTTTTAAATGGGAAC	TGCAGACCAAGATCCTCAAAATTTCTTTACGTTCTCCTGACATTTTCGTTTTTTAAATGGGAAC	NA	NA	0	27	0	52	20	30	0	50	0	24	0	27	NA	NA	0	126	0	63	16	29	0	62	5	28	8	16	11	31	0	23	NA	NA	8	25	NA	NA	NA	NA	0	29	NA	NA	0	26	0
TP24820	TGCAGACCATTATTTCTTATTCCTGATCATGGAATTCTGCCATTTGTCAATTTGTTTTTTCAAA	TGCAGACCATTATTTCTTATTCCTGATCATGGTATTCTGCCATTTGTCAATTTGTTTTTTCAAA	9	28	37	36	8	47	6	69	8	52	10	20	8	16	9	18	7	81	35	15	11	45	22	21	0	37	0	46	4	38	6	19	10	14	4	35	0	48	0	50	5	41	NA	NA	0	28	NA
TP32332	TGCAGACGCTCGTCCCGCCGCTGTGGAAGTCCTTTAAACGCGTACAAATTTTGGTGCGAATTTG	TGCAGACGCTCGTCCCGCCGCTGTGGAAGTCCTTTAAACGCGTACAAATTTGGGTGCGAATTTG	6	23	40	14	5	37	24	20	10	23	20	19	NA	NA	NA	NA	45	48	18	21	29	11	18	10	14	21	14	7	29	15	NA	NA	19	12	51	1	44	4	36	2	22	4	23	7	14	23	NA
TP32420	TGCAGACGCTGACCACAATTTCGTAGGCGACGCATAACAGTGTTTGTTTGAAGGGCCTAATTTT	TGCAGACGCTGACCACAATTTCGTAGGCGACGCATAACAGTGTTTGTTTGAAGGGCCTAATTTA	63	1	72	0	44	0	76	1	37	0	71	0	NA	NA	41	0	101	0	57	0	84	1	63	2	40	1	46	0	58	0	59	2	87	1	64	1	59	0	74	0	31	0	NA	NA	71	0	38
TP32989	TGCAGACGGAAAACAGAGAGTTGCAACGAACTCCGTCAAATTAGAATACAAAATTTTGGGAAAG	TGCAGACGGAAAACAGAGAGTTGCAACGAACTCCGTCAAATTAGAATAAAAAATTTTGGGAAAG	8	13	22	11	11	9	29	16	53	19	52	15	30	12	18	6	112	49	48	13	92	28	49	29	24	14	18	7	28	14	67	13	0	0	30	36	29	13	11	26	29	13	28	17	44	8	36
TP33343	TGCAGACGGCCAATGATCTGTTGGCCAACAATGGCGCAACTCTTGTTGATCTGGCCAGCGCTTC	TGCAGACGGCCAATGATCTGTTGGCCAACAATGGCGCAACCCTTGTTGATCTGGCCAGCGCTTC	43	35	74	34	146	19	79	0	74	32	57	27	51	14	40	17	94	17	62	44	46	16	61	25	72	19	51	11	105	10	37	58	28	9	82	12	145	2	120	0	68	10	43	11	62	47	30
TP33688	TGCAGACGGCGGAATCGTAGCCCACGGTGATGACGGGCGCTGCCATACTCGAATTGGATGCGGG	TGCAGACGGCGGAATCGTAGCCCACGGTGATGACGGGCGCGGCCATACTCGAATTGGATGCGGG	NA	NA	12	8	8	38	65	17	20	34	31	9	46	6	NA	NA	25	83	18	20	49	21	11	41	26	20	24	11	25	10	23	39	27	27	16	14	26	0	NA	NA	17	33	NA	NA	22	23	11
TP34173	TGCAGACGGTCCACACAATGTTGAACAGTGTGAGCAGGGCACAACCCAACGCATAGAACAGGGG	TGCAGACGGTCCACACAATGTTGAACAGTGTGAGCAGGGCACAACCCAACGCATAGAACAGGGA	24	0	31	1	41	1	58	0	37	0	26	0	20	0	NA	NA	65	1	55	0	49	0	67	0	40	0	NA	NA	75	0	36	0	48	1	57	0	27	0	20	0	36	1	39	0	41	0	NA
TP34555	TGCAGACGTACGATCGCGAGTACGGTTTTGGCATTGATCACGCCATGCATCACATTACGGATGT	TGCAGACGTACGATCGCGAGTACGGTTTTGGCATTGATCACGCCATGCATCACATTACGGATGG	2	170	1	110	0	133	0	226	1	177	1	168	0	45	0	104	5	373	0	184	0	155	0	177	0	119	0	80	0	121	0	153	0	184	0	210	1	94	0	146	0	98	0	80	0	186	0
TP34696	TGCAGACGTCGATGCTGGCCAGCACGGACCCGTACAACGACACGGAATTGGTCGAAATTGTGTG	TGCAGACGTCGATGCTGGCCAGCACGGACCCGTACAACGACACGGAACTGGTCGAAATTGTGTG	14	8	NA	NA	27	1	44	28	19	10	11	20	27	3	20	0	35	70	31	0	29	34	30	1	16	14	1	23	14	11	4	38	14	20	17	46	NA	NA	0	27	26	2	NA	NA	21	4	NA
TP34930	TGCAGACGTTCATTTACGAAATTGATCCAAACTGAAAAGGGTGCCAATGCGTTCAGTTTTGTGC	TGCAGACGTTCATTTACGAAATTGATCCAAACTGAAAAGGGTGCCAATGCGTTCAGTTTTATGC	40	7	29	31	48	33	21	28	45	18	25	18	NA	NA	25	0	106	0	24	10	25	24	15	18	18	2	24	2	29	35	31	3	24	16	64	0	41	0	59	0	34	11	39	0	27	19	21
TP35371	TGCAGACTCCCTCCCTTCGAGCGGACCCCCTTTTCACCATCACAAATACAACATTTAATCTTTT	TGCAGACTCCCTCCCTCCGAGCGGACCCCCTTTTCACCATCACAAATACAACATTTAATCTTTT	8	245	54	202	67	306	173	896	113	345	109	357	63	145	28	250	187	1150	96	429	89	675	65	302	14	252	107	281	74	488	40	565	58	210	43	323	9	269	3	313	31	283	43	254	21	429	38
TP35740	TGCAGACTGCCCACTCGGCAGGCGGAGAGAAGAGAGTCGCCAACTACTCTCTCGACGCTTGGAT	TGCAGACTGCCCACTCGGCAGGCGGAGAGAAGAGAGTCGCCAACTACTCTCTCGACGCATGGAT	52	0	73	0	79	0	192	33	117	7	208	0	67	0	83	0	281	0	184	39	244	9	176	0	143	0	115	0	139	18	137	7	74	0	156	5	157	2	121	10	110	0	84	7	140	0	100
TP35945	TGCAGACTGGGCACGTGCGGTTTGTCGCCAGCCACCTCCTGATGCACATCGAGTGGAAGATGTG	TGCAGACTGGGCACGTGCGATTTGTCGCCAGCCACCTCCTGATGCACATCGAGTGGAAGATGTG	28	25	59	95	2	221	442	318	246	116	37	126	20	31	23	86	216	268	93	85	890	282	75	31	80	118	461	162	333	255	9	112	440	181	873	363	930	178	1390	202	187	89	36	114	8	158	11
TP36759	TGCAGAGAATGGCAAAGTTAATGACGGCACTTTATGATCAATAACTGATCAGTGATTATTTGCA	TGCAGAGAATGGCAAAGTTAATGACGACACTTTATGATCAATAACTGATCAGTGATTATTTGCA	41	26	24	43	20	41	38	53	18	17	12	56	10	16	7	28	23	108	68	0	49	47	7	59	1	49	27	16	39	23	49	11	39	28	80	31	72	40	45	7	15	58	11	41	11	35	10
TP36790	TGCAGAGAATGGGATTATTATTAGGTGCTATTCTGCTGATGGATAAGATTTTCTTTTTATTTAT	TGCAGAGAATGGGATTATTATTAGGCGCTATTCTGCTGATGGATAAGATTTTCTTTTTATTTAT	5	23	0	39	NA	NA	19	28	0	32	0	27	NA	NA	NA	NA	0	55	NA	NA	3	43	0	44	0	32	NA	NA	12	16	0	56	0	41	2	43	0	51	0	27	NA	NA	NA	NA	7	13	0
TP36819	TGCAGAGAATTTGGGTGCCAAATACAATGTGACACGAGAGGAGGCCGACGCTTATGCCATTCGT	TGCAGAGAATTTGGGTGCCAAATACAATGTGACACGAGAGGAGGCCGACGCTTATGCCATTCGG	0	41	0	72	2	41	1	112	1	67	1	42	0	29	2	30	3	122	0	82	2	94	0	68	2	38	1	42	2	45	0	71	0	43	1	93	0	44	0	40	1	29	0	39	0	70	0
TP37332	TGCAGAGAGGACTGTGAGTGCAATCAGCTGCATGCATCGGACAAACAGGACTGAGGTAATTGCG	TGCAGAGAGGACTGTGAGTGCAAGCAGCTGCATGCATCGGACAAACAGGACTGAGGTAATTGCG	87	0	61	0	84	0	103	0	80	0	94	0	33	0	49	0	104	3	97	0	97	20	75	16	29	5	46	24	74	0	95	1	87	0	88	0	89	0	32	17	47	0	43	5	97	10	41
TP37536	TGCAGAGATCAGTTCAGGTCTGAGAATGACATCAATATGCCAAGCAACTCGTACAGTGAAAAGA	TGCAGAGATCAGTGCAGGTCTGAGAATGACATCAATATGCCAAGCAACTCGTACAGTGAAAAGA	0	43	0	82	0	146	0	223	0	106	0	110	NA	NA	0	122	0	244	79	21	0	292	0	76	0	63	31	286	0	291	0	53	0	126	0	152	0	242	0	224	0	39	0	65	0	116	1
TP37543	TGCAGAGATCAGTGCAGTGAAAAGAAGCCAAACGACCAGAACGGCAGGCGATCAACAGCGATCG	TGCAGAGATCAGTGCAGTGAAAAGAAGCCAAACGACCAAAACGGCAGGCGATCAACAGCGATCG	147	0	81	0	162	0	199	21	108	6	127	0	127	0	44	0	231	0	150	0	163	5	158	0	89	0	76	0	147	3	158	0	80	0	275	0	81	0	132	0	75	0	55	0	122	0	70
TP37895	TGCAGAGCAACTCGAAGAAATGAAAAACAAAGTGTGCGGTTTTCGGCTAAGATTTAAATGCAGT	TGCAGAGCAACTCGAAGAAATGAAAAACAAAGTGCGCGGTTTTCGGCTAAGATTTAAATGCAGT	2	37	25	2	14	12	13	74	22	37	12	27	6	18	NA	NA	64	41	5	21	16	66	22	10	17	19	0	27	8	40	12	20	12	27	18	54	10	49	0	25	28	15	6	14	6	31	10
TP38043	TGCAGGGCACAATTTTGGAAAGGGTTAAAAATTCCCCAACTTTTCGAGTCGAAGTACCGATCTT	TGCAGAGCACAATTTTGGAAAGGGTTAAAAATTCCCCAACTTTTCGAGTCGAAGTACCGATCTT	41	2	30	0	49	6	83	0	60	1	72	0	44	0	31	9	184	1	98	3	92	0	90	0	NA	NA	61	1	115	0	64	0	68	1	129	3	92	7	67	9	68	0	23	4	22	0	NA
TP38058	TGCAGAGCACACGTGGGCTCAAAGTCATCATCAACAAACACAACACAACACGGATATGGGGCGA	TGCAGAGCACACGTGGGCTCAAAGTCAGCATCAACAAACACAACACAACACGGATATGGGGCGA	9	68	73	16	21	82	4	35	1	68	23	57	0	51	0	62	0	122	10	66	28	17	33	37	9	72	24	3	0	61	0	39	63	24	3	39	32	24	40	2	NA	NA	0	45	9	88	0
TP38164	TGCAGATCACGAATATGACCTTTATTTTGCAAAAATTCCATTGTTCTGTAGTACAAATTGCCAA	TGCAGAGCACGAATATGACCTTTATTTTGCAAAAATTCCATTGTTCTGTAGTACAAATTGCCAA	0	75	0	91	0	86	28	77	10	98	0	62	0	27	0	28	0	146	0	136	16	135	0	82	NA	NA	NA	NA	15	44	NA	NA	0	96	0	179	0	145	9	67	13	101	0	52	0	88	0
TP38675	TGCAGAGCATGGACAGCGGGAGATTGTGAAGATTTTGTTGAAGCGGCCAAACGTTGACGCATCA	TGCAGAGCATGGACAGCGGGAGATTGTGAAGATTTTGCTGAAGCGGCCAAACGTTGACGCATCA	38	4	29	0	28	0	39	0	15	8	NA	NA	23	0	NA	NA	51	0	18	17	40	0	45	0	34	0	31	2	21	0	32	7	24	0	37	3	38	2	35	0	NA	NA	17	4	28	3	NA
TP38747	TGCAGAGCATTCAGGACGGACTGACGTTGGCCCAAGTGGCATTTCCAGCAGCGAAAAATCCGAC	TGCAGAGCATTCAGGACGGACTGACGTTGGCCCAAGTGGCATTTCCAACAGCGAAAAATCCGAC	0	65	NA	NA	1	98	13	109	12	68	23	24	NA	NA	10	48	0	130	0	58	0	115	37	50	0	59	0	69	6	43	21	39	4	43	19	52	0	64	0	41	14	37	0	27	14	40	1
TP42495	TGCAGATGATCGAGCAATTCCAAAGGCTTCTTCCATTCGCTGTATGGTCCGCTCAGTTTATGAT	TGCAGAGGATCGAGCAATTCCAAAGGCTTCTTCCATTCGCTGTATGGTCCGCTCAGTTTATGAT	13	24	10	20	4	38	23	51	12	23	0	44	4	20	4	19	17	36	8	23	24	19	6	34	8	14	8	20	17	22	33	5	11	26	30	21	10	36	14	17	NA	NA	5	17	18	30	15
TP42577	TGCAGAGGATTCTAAAGTGGATGAAAAACAACAGTCTGCTCAAAGCTCCGCTGTCATCGCCACA	TGCAGAGGATTCTAAAGTGGATGAAAAACAACAGTCTGCTCAAAGCTCCGCTGTCACCGCCACA	0	36	NA	NA	0	44	NA	NA	1	28	0	60	1	33	0	47	0	90	11	40	2	26	0	46	1	37	NA	NA	0	27	0	30	0	57	14	36	NA	NA	24	0	1	23	0	38	0	55	0
TP43164	TGCAGAGGGCACTGAGAGAATTTGAACAATCGCTGGAGAACACACGCGCAGCGGTGGGCTGACA	TGCAGAGGGCACTGAGAGAATTTGAACAATCGCTGGAGAACACACGCGCAGCAGTGGGCTGACA	35	0	87	0	45	0	18	13	58	3	67	0	28	0	43	0	152	0	81	0	34	21	59	0	43	0	26	5	56	37	39	0	54	0	88	0	104	0	49	0	55	0	21	0	48	0	39
TP43713	TGCAGAGTAGCTGTCTTGCGGTTGCTTGGCGAAAGTTGCGCCGCGCCATGGGGAGCATTTTAAA	TGCAGAGTAGCTGTCTTGCGGTTGCTTGGCGAAAGTTGCGCCGCGCCATGGGAAGCATTTTAAA	4	52	2	204	0	193	346	97	28	191	11	291	6	133	2	308	7	991	14	244	307	400	5	251	53	537	335	361	176	89	5	23	76	259	239	23	112	7	127	3	21	285	0	54	2	285	5
TP43753	TGCAGAGTATCGTAGGCAATGTGCAGCGCCACCAGTGTTCCAGTCCGTCCGATTCCTGAAAATG	TGCAGAGTATCGTAGGCAATGTGCAGCGCCACCAGTGTTCCAGTCCGTCCGATTCCTAAAAATG	1049	37	1238	135	1138	152	2570	463	1191	321	1356	170	515	161	813	207	2212	254	1299	558	152	306	1082	206	1134	125	824	174	1728	616	1051	47	966	112	2572	161	1842	177	1552	153	1015	124	786	66	1281	122	902
TP43860	TGCAGAGTCCAGCCAGCTCTAGCACCAGCAGTTGTGGTGTCCGTGTGTCGCGCACACGTCGTCT	TGCAGAGTCCAGCCAGCACTAGCACCAGCAGTTGTGGTGTCCGTGTGTCGCGCACACGTCGTCT	0	36	4	21	0	30	3	45	0	38	0	31	0	34	0	21	0	69	NA	NA	3	47	0	30	NA	NA	NA	NA	7	46	0	37	0	27	11	26	16	19	NA	NA	4	26	0	22	0	37	0
TP43925	TGCAGAGTCCTTCTTGAAGGCAATTTGCAACTGAATGCACAAAAATAACAAATTTGGAGAATTG	TGCAGAGTCCTTCTTGAAGGCAATTTGCAACTGAATGCACAAAAATAACAAATTTGGAGAATTA	42	76	37	17	60	88	55	68	58	66	17	102	26	58	28	72	133	145	28	56	67	62	40	66	59	33	36	7	24	38	77	11	72	83	65	18	32	15	42	0	63	46	17	37	50	133	30
TP44556	TGCAGAGTTCTCTTCTATTCTTGGTCTCGAGAAATTTCTTCGATTCATTCGGTCGCTAGTCCCG	TGCAGAGTTCTCTTCTATTCTTGGTCTCGAGAAATTTCTTCGAGTCATTCGGTCGCTAGTCCCG	0	81	0	47	0	102	0	156	3	69	0	108	6	32	4	49	0	129	21	43	18	135	8	88	0	79	5	36	0	101	0	49	27	46	3	100	29	58	47	10	19	31	0	40	0	92	0
TP44567	TGCAGAGTTGAAAAGCCATTCTTAATTGTTGATTTCTCGAATTCTTCAGAACTTAACACCAAAG	TGCAGAGTTGAAAAGCCATTCTTAATTGTTGATTTCTCGAATTCTTCAGAACTTAACACCAAAA	0	93	NA	NA	1	50	2	129	0	44	0	63	0	41	0	23	0	160	0	52	0	96	0	84	0	86	0	36	1	43	1	66	0	57	0	120	0	60	0	60	0	66	0	49	0	45	0
TP45244	TGCAGATCCAAGTGCGCGAGGTTGAGGTTGTGGAGCGCAAGGAGAAGGAAAATTTGTCGGCCCG	TGCAGATACAAGTGCGCGAGGTTGAGGTTGTGGAGCGCAAGGAGAAGGAAAATTTGTCGGCCCG	0	45	0	79	0	44	0	41	0	71	NA	NA	0	33	0	49	0	68	0	92	13	37	0	37	0	74	NA	NA	0	47	0	56	0	48	0	24	NA	NA	NA	NA	0	27	0	32	0	47	NA
TP45561	TGCAGATACGCTCGCAAATTGGAGCAGGTTATTGTATCGCGACATGTGTCGCACAAACTCTTTC	TGCAGATACGCTAGCAAATTGGAGCAGGTTATTGTATCGCGACATGTGTCGCACAAACTCTTTC	138	16	558	9	178	0	204	147	425	18	128	0	264	9	326	14	682	25	293	1	365	38	157	0	382	68	105	1	175	164	337	19	195	63	148	101	16	33	30	63	133	38	176	3	272	0	139
TP46874	TGCAGATAGTCATTTTTAGTGACTTTGTGTTTCATCGCGGACTGTCGCCAGCGATCCAATCGTT	TGCAGATAGTCATTTTTAGTGACTTTGTGTTTCATCGCGGACTGTCGCCAGCGATCCAATCGGT	0	84	0	81	2	104	0	112	0	84	0	62	0	70	1	80	0	160	0	74	0	120	0	84	0	76	0	53	0	71	0	90	0	77	0	78	0	93	1	59	0	54	0	33	1	67	1
TP46984	TGCAGATAGTGGTGGTGATAGCGGTTGTTATAATTACGATCATTTGCAGTAGCCGCAGCTACAG	TGCAGATAGTGGTGGTGATAGCGGTTGTTATAATTACGATCATTTACAGTAGCCGCAGCTACAG	NA	NA	33	9	18	19	29	24	NA	NA	10	30	15	5	29	10	26	53	7	35	18	49	12	15	24	19	2	36	14	19	NA	NA	11	28	17	30	0	35	0	34	9	13	20	19	12	17	19
TP47010	TGCAGATAGTTAGCATTGTGCCTACCAGCATGATCAACGATGTCGTGCTGAAGACCATTGGAGA	TGCAGATAGTTAGCATTGTGCCTACCAGCATGATCAACGATGTCGTGCTGAAGACCATTAGAGA	25	60	237	20	55	67	51	177	74	28	79	37	27	19	72	15	121	62	88	23	94	46	40	38	79	20	29	13	44	88	25	51	28	36	33	42	15	25	11	18	50	24	57	19	77	42	28
TP47916	TGCAGATCAATCATTTTATTTGTATTTTCATTGTTAAACTTATTCCATCGTTTTATCAGTATCA	TGCAGATCAATCATTTTATTTGTATTTTCATTGTTAAACTTATTCCATCCTTTTATCAGTATCA	23	31	73	3	46	12	103	11	51	6	66	49	31	0	58	3	162	7	91	0	85	13	50	15	57	6	62	1	81	7	12	48	52	12	91	12	84	2	72	3	26	15	64	0	80	22	28
TP49348	TGCAGATCATGTGCACTGTGCAGTTGTGCCGTTTTGTCCTTAAACTTGTAAAATTCAAATACAA	TGCAGATCATGTGCACTGTGCAATTGTGCCGTTTTGTCCTTAAACTTGTAAAATTCAAATACAA	12	49	50	67	37	20	12	31	7	20	13	71	13	35	13	26	11	147	0	0	16	23	66	40	28	13	19	6	1	38	NA	NA	NA	NA	25	20	39	0	26	4	16	5	11	13	63	22	21
TP49384	TGCAGATCATTCAGCCCTAAAGCAGCTTTTCCTTTCGCTTGAAAGTGTCATTGAGCCTTTGTGA	TGCAGATCATTCAGCCCTAAAGCAGCGTTTCCTTTCGCTTGAAAGTGTCATTGAGCCTTTGTGA	28	0	36	0	42	0	115	0	80	0	55	0	32	0	41	0	107	0	64	0	72	4	94	0	69	1	23	18	73	0	45	2	46	15	100	7	49	4	57	25	37	6	32	0	74	0	25
TP54882	TGCAGATCGGCCTATTCCGCGCAGCTTTACCTCGAGCAGGGGTGGCGCGTGTTCGCCCAGCACG	TGCAGATCGGCCTATTCCGCGCAGCTTTACCTTGAGCAGGGGTGGCGCGTGTTCGCCCAGCACG	65	8	54	63	12	101	50	115	104	24	99	52	11	36	24	50	61	204	23	93	122	51	8	92	47	20	68	21	60	57	25	30	32	49	80	46	62	41	82	0	23	42	20	27	42	51	30
TP57755	TGCAGATGAACCAAGGAAAAGTCCGTTTCGTGTTGAAGAGGCGATGCTGCTGCCCTTTGGTCCA	TGCAGATGAACCAAGGAAAAGTCCGTTTCGTGTTGAAGAGGCGACGCTGCTGCCCTTTGGTCCA	18	148	0	243	0	233	0	322	0	184	0	244	4	57	0	132	0	502	0	205	0	240	0	320	20	168	16	110	0	222	10	101	0	87	119	252	47	194	72	97	0	148	0	106	0	263	0
TP57855	TGCAGATGAAGAAATGGCGTTGGTTTTTAACAGAAAAGTGGCCAACAAAGCCTTCAATGGAGTT	TGCAGATGAAGAAATGGCGTTGGTTTTTAACAGAAAAGTGGCCAACAAAGCCTTCAACGGAGTT	0	172	12	94	7	175	13	95	18	157	40	92	15	85	12	96	14	227	19	239	21	222	6	117	14	116	9	85	23	151	0	90	0	32	5	92	0	101	0	119	6	68	2	43	14	114	8
TP58025	TGCAGATGAATCAAAGAAAAATTGGTTATTTAATGTTTCGCTTTTTTTATTTTTTGGTTTTTTT	TGCAGATGAATCAAAGAAAAATTGGTTATTTAATGTTTCGCTTTTTTTATTTTTTGGTTTTTTA	1	44	0	39	1	25	1	81	0	40	1	45	0	32	0	42	1	64	0	39	1	41	0	61	0	21	2	22	2	41	2	59	2	46	1	40	1	50	2	30	2	19	NA	NA	0	37	NA
TP58417	TGCAGATGAGAGGAGACCAGTAAAAAAGGGAATTTTATAAGCCCAAATTTGTTGTTTACAGGCT	TGCAGATGAGAGGAGAACAGTAAAAAAGGGAATTTTATAAGCCCAAATTTGTTGTTTACAGGCT	57	25	88	58	69	17	101	16	76	32	60	34	26	12	49	11	145	26	78	7	68	23	87	48	86	20	27	7	63	13	67	22	22	10	34	19	NA	NA	0	0	30	9	31	14	110	31	84
TP58703	TGCAGATGATCAGCGTCGCGTTCCATCCTCAAAGAAGATGCCGCCGTCGATGGCACAATATTTC	TGCAGATGATCAGCGTCGCGTGCCATCCTCAAAGAAGATGCCGCCGTCGATGGCACAATATTTC	3	27	75	4	6	50	16	29	2	26	23	9	NA	NA	NA	NA	38	72	18	19	33	24	19	23	21	25	14	19	2	20	15	16	NA	NA	1	30	4	31	0	27	3	23	0	21	19	33	NA
TP58720	TGCAGATGATGAGGGAATTGACGCGCAGAAGCTGCTTTTTCTCGCTTGTATTCAGGGCAAATTG	TGCAGATGATCAGGGAATTGACGCGCAGAAGCTGCTTTTTCTCGCTTGTATTCAGGGCAAATTG	41	67	67	122	35	103	78	194	28	104	7	160	18	52	19	68	118	161	8	73	43	110	46	119	11	99	37	75	16	119	33	136	32	106	65	123	39	94	69	120	29	85	20	77	89	105	19
TP59002	TGCAGATGATGACCAGCTGGGCACTGATCTGTCACGTGTGGTATTTGCCACCGATGACCAAAGA	TGCAGATGATGACCAGCTGGGCACTGATCTGCCACGTGTGGTATTTGCCACCGATGACCAAAGA	0	34	7	16	6	44	25	9	8	19	NA	NA	NA	NA	3	20	2	46	0	24	5	25	0	26	NA	NA	NA	NA	7	16	0	22	6	25	25	24	NA	NA	NA	NA	0	22	4	24	0	27	2
TP59205	TGCAGATGATTGTGCCAACATGAAAGTGTCAAAAAGTGAAACGCAACCGCCGCTGCCGCTGCCC	TGCAGATGATTGTGCCAACATGAAAGTGCCAAAAAGTGAAACGCAACCGCCGCTGCCGCTGCCC	0	23	0	78	0	89	0	33	0	54	0	54	NA	NA	NA	NA	0	121	3	102	0	60	0	40	0	61	8	27	0	57	NA	NA	0	24	5	30	13	28	23	20	0	48	0	47	0	59	NA
TP59466	TGCAGATGCAGCAACAGTTGATGATCAGGGCAGAGGAAAGTCGCAAGAGGAGACGGAGGAGGAC	TGCAGATGCAGCAACAGTTGATGATCAGGGCAGAGGAAAGTCACAAGAGGAGACGGAGGAGGAC	NA	NA	55	0	49	0	49	18	NA	NA	35	0	NA	NA	24	0	73	0	38	0	37	0	32	0	NA	NA	20	3	38	12	43	0	34	0	45	0	38	0	41	0	42	0	NA	NA	30	0	NA
TP59503	TGCAGATGCCGCCGCCGCCGCTGCTCCGTAACGCTTTGGCGGCAATTTGGGCGCAATGCGCGGC	TGCAGATGCAGCCGCCGCCGCTGCTCCGTAACGCTTTGGCGGCAATTTGGGCGCAATGCGCGGC	17	6	80	0	63	3	74	0	61	2	52	0	29	0	34	0	144	2	85	0	91	5	60	0	34	17	34	0	89	0	92	0	75	0	92	0	47	0	53	0	64	0	27	0	76	0	36
TP61317	TGCAGATGCTTGGCATGTACTGTTTGATCATGATGAAGCGAAGCTGACTGAGTGTTGGCCATGT	TGCAGATGCTTGGCATGTACTGTTTGATCATGATGAAGCGAAGCTGACTGAGGGTTGGCCATGT	0	141	6	275	0	119	53	251	0	162	0	112	0	70	0	87	13	371	1	141	29	131	0	180	0	144	10	96	29	173	0	131	0	134	15	225	20	229	23	146	6	91	0	149	50	171	3
TP61767	TGCAGATGGAGTTGTCGGAAGCCTCGAACAATCTTTGTGTGCTCAACACGCACCGAGGCCTGTT	TGCAGATGGAGTTGTCGGAAGCCTCGAACAATCTTTGCGTGCTCAACACGCACCGAGGCCTGTT	30	3	73	6	31	58	74	44	21	44	14	43	36	21	11	40	46	40	38	48	133	45	20	81	5	64	26	13	37	4	38	25	0	34	23	11	37	12	23	4	4	27	2	37	28	38	NA
TP61887	TGCAGATGGCACTTTCCGACGCTGAACAAGTTCCCGACCTGGAGGAGCAGGAACGTGCTCGGCA	TGCAGATGGCACTTTCCGACGCTGAACAAGTGCCCGACCTGGAGGAGCAGGAACGTGCTCGGCA	0	22	7	74	4	36	0	97	0	38	0	48	0	21	0	25	2	111	0	49	12	42	0	44	0	94	11	25	0	42	2	34	5	30	5	54	14	65	25	54	2	26	0	33	0	44	14
TP62582	TGCAGATGGGCCTGTTCAACGTGAACCAGGAAGTGGAGCTGCTCAGCAAATTGTTCAGCAGCTG	TGCAGATGGGCCTGTTCAACGTGAACCAGGAAGAGGAGCTGCTCAGCAAATTGTTCAGCAGCTG	22	22	49	14	99	8	122	22	58	6	69	28	41	0	54	18	188	57	54	0	110	14	77	3	80	6	19	5	85	13	95	14	73	20	64	9	51	21	30	4	50	10	40	4	66	42	45
TP63843	TGCAGATGTTGCCAACCGATGATGGACCATTATTGGGGTGAGAGAGCGGACAAGCAGTGTGTGG	TGCAGATGTTGCCAACCGATGATGGACCATTATTGGGGTGAGAGAGCGGACAAGCAATGTGTGG	110	0	82	0	153	0	120	25	80	2	109	0	NA	NA	66	0	275	0	87	0	31	73	104	0	94	0	55	10	89	41	89	0	88	0	114	7	117	3	96	10	94	0	82	0	140	0	53
TP64199	TGCAGATTCACCTGTACCCCACAAAAATTTTTATTGGCATTATGACAATTGCCCCGAAATTTTG	TGCAGATTCACCTGTACCCCACAAAAATTTTTATTGGCATTATAACAATTGCCCCGAAATTTTG	21	18	54	6	49	14	59	29	57	11	47	25	44	4	30	26	74	108	36	26	16	80	44	46	51	14	21	16	58	26	31	44	63	17	87	1	54	32	60	23	33	0	42	17	36	43	26
TP64480	TGCAGATTCCGACACAATCGAAAGGGTACAACTCCAGCAGCGACAACAAGTTGGAGAAGTACAT	TGCAGATTCCGACACAATCGAAAGGGTACAACTCCAGCAGCGACAACAAGTTAGAGAAGTACAT	77	0	71	0	53	0	130	0	182	0	167	0	48	0	91	0	370	0	38	0	159	0	107	0	87	0	85	0	123	0	87	0	143	0	173	0	77	0	44	0	41	0	65	0	94	15	47
TP64593	TGCAGATTCGCAGCGCGCCTGCCGATTTGTGCAGGGCACAGACTGGTGCTTTAAGAAGTTCATC	TGCAGATTCGCAGCGCGCCTACCGATTTGTGCAGGGCACAGACTGGTGCTTTAAGAAGTTCATC	38	9	29	53	79	0	50	22	54	36	44	34	24	8	18	42	31	276	8	145	32	31	71	36	40	36	27	4	52	24	6	45	44	54	62	132	32	52	52	14	32	29	23	26	23	43	14
TP64650	TGCAGATTCGCGAGTTCCAAAGGGTGCGTTTTGCGCGTGACGGTGCTACGATAGTGGCGGGTAC	TGCAGATTCGCGAGTTCCAAAGGGTGCGTTTTGCGCGCGACGGTGCTACGATAGTGGCGGGTAC	0	38	16	30	26	77	31	32	23	53	51	18	11	9	20	23	18	96	22	27	86	45	20	57	3	33	14	12	33	33	5	51	31	13	42	26	21	8	40	19	29	30	3	17	8	46	4
TP64932	TGCAGATTCTGAACCATCAGGTGGTGATGGCACGATGGGATGAATACCAAGGAGTGGCATGGCG	TGCAGATTCTGAACCATCAGGTGGTGATGGCACGATGGGATGAATACCAAGGAGTGGCATGGCA	63	44	33	65	25	99	0	157	30	56	16	86	NA	NA	41	33	19	208	36	56	18	98	11	92	18	72	0	44	0	112	3	96	8	64	4	165	0	81	0	135	12	58	18	37	47	57	24
TP65126	TGCAGATTGACACATGTGCGCCAGTGTCCAATTGAAACCGAGTTATTTTCCCGTTAACGAATCC	TGCAGATTGACACATGTGCGCCAGTGTCCAATTGAAACCGAATTATTTTCCCGTTAACGAATCC	178	96	191	185	196	131	307	92	198	129	125	125	105	60	98	70	189	272	124	50	283	94	166	128	132	96	101	38	280	84	164	104	114	66	125	70	104	29	128	59	65	45	88	82	258	89	94
TP65217	TGCAGATTGAGCCCCGTCTGAACGAAAAATTGGTGCCAAAGTGTCAGTCTGCTTCCGCCTCCTC	TGCAGATTGAGCCCCATCTGAACGAAAAATTGGTGCCAAAGTGTCAGTCTGCTTCCGCCTCCTC	29	1	24	2	56	0	78	0	NA	NA	42	0	32	0	24	0	124	0	39	0	51	0	43	0	49	0	45	17	37	0	30	4	74	0	62	6	54	15	27	24	35	3	NA	NA	38	0	NA
TP66090	TGCAGATTGTGAACATTTAGCTTGAAATCGGCACGGATGGCCAAGGCCGTGGTTGGAGTGCGGA	TGCAGATTGTGAACATTTAGCTTGAAATCGGCACGGACGGCCAAGGCCGTGGTTGGAGTGCGGA	20	14	0	62	35	60	21	90	56	53	15	59	0	25	0	60	130	130	0	60	43	64	5	96	5	78	23	3	48	56	5	31	11	56	33	62	23	84	47	27	26	42	3	61	29	40	0
TP66135	TGCAGATTGTGCCGTTTTACGAAAAGTGTTGCTGGTTGAGCAAAGCAGTTTGTCGCCGTGCTGA	TGCAGATTGTGCCGTTTTACGAAAAGTGTTGCTGGTTGAGCAAAGCAGCTTGTCGCCGTGCTGA	263	2	513	26	337	10	539	22	345	3	268	24	189	3	199	7	705	13	433	3	610	1	375	18	195	4	346	3	410	20	250	14	299	0	489	3	342	0	380	0	163	2	208	22	286	15	174
TP66205	TGCAGATTGTTGAGGAAATGGTTTTCTGTTTTCCTTTCTTGCTACATCCACAATCTGTTGAATA	TGCAGATTGTTGAGGAAATGGTTTTCTGTTTTCCTTTCTTGCCACATCCACAATCTGTTGAATA	0	72	3	37	7	94	34	106	4	81	0	62	0	26	0	64	14	140	0	78	0	126	0	85	0	49	6	33	30	107	4	48	17	58	1	72	0	90	0	55	9	14	4	24	36	66	1
TP66426	TGCAGATTTCGCCCTTCAACAATGGGCTACTCTTGGCACACAATCATTTGGCCATTTGTTCGGG	TGCAGATTTCGCCCTTCAACAATGGGCTACTCTTGGCACACAATCATTTGGCCATTTGTTCGGC	85	0	86	1	88	1	125	0	84	0	88	0	43	1	76	1	219	0	121	0	141	0	142	0	115	1	54	0	159	2	87	0	43	0	152	1	70	0	125	0	103	0	105	0	156	0	69
TP66570	TGCAGATTTGGTTCGCTGGTTCCCCCGAATCGGACGTGCAAAAATCACTGTTCGAAAAAGACGT	TGCAGATTTGGTTCGCTGGTTCCCCCGAATCGGACGTGCAAAAATCACTGTTCGAAAAAGACGG	0	20	NA	NA	3	52	2	73	0	37	0	54	0	25	1	43	1	64	0	33	1	46	0	42	0	26	1	19	2	51	0	50	0	41	0	49	1	30	1	46	0	31	1	21	2	56	0
TP66679	TGCAGATTTTCCGTTTGGTAGCATCATGTTGTCCGATGGAAAGCATCTTTTGCAGCCGTGCCAG	TGCAGATTTTCCGTTTGGTAGCATCATGTTGTCCGATGGAAAGCATCTTTTGCAGCCGCGCCAG	23	0	45	9	39	0	67	4	50	3	29	2	NA	NA	33	1	135	8	NA	NA	41	6	49	23	34	0	NA	NA	48	7	80	0	34	0	58	15	22	0	NA	NA	30	2	36	1	76	1	30
TP66744	TGCAGATTTTGACGCTATTCTTCACTGTTTTATGTCTGATTTGCGCTTTCTTTCATTTCTTTTC	TGCAGATTTTGACGCTATTCTTCACTGTTTTATGTCTGATTTGCGCTTTCTTTCATTTCTTTCC	78	1	67	2	92	3	130	4	63	0	63	2	40	2	30	0	124	4	57	0	77	6	82	2	29	2	38	0	93	3	52	1	55	1	73	2	76	1	78	2	31	1	57	0	55	0	39
TP66810	TGCAGATTTTTGTCATCCGCCTGAAAATTTGCATACCGAAACGTAAGAAGAACTGAAACACCTT	TGCAGATTTTTGTCATCCGCCTGAAAATTTGCATACCGAAACGTAAGAAGAACCGAAACACCTT	0	55	0	151	0	53	15	116	0	75	0	72	0	48	0	70	0	127	0	52	0	84	0	103	0	42	0	87	2	72	0	52	0	61	0	98	0	99	0	48	0	70	0	28	0	94	0
TP66981	TGCAGCAAAACAACTCAAATTCGGATCATTTTCATCATTTCCCTTTCGCTTTTTTCTTCAATAA	TGCAGCAAAACAACTCAAATTCGGATCAGTTTCATCATTTCCCTTTCGCTTTTTTCTTCAATAA	1	25	3	90	0	96	26	81	6	61	0	59	NA	NA	0	39	0	111	23	58	21	66	0	94	6	46	25	12	3	51	4	35	12	58	28	32	61	32	55	19	11	38	0	40	4	60	3
TP67368	TGCAGCAAACAATGGCACTGGGCGGGTTGGGCAATTCCAGCGGAGGGACAGCGAGCAGTATGAT	TGCAGCAAACAATGGCACTGGGCGGGTTGGGCAATTCCAGCGGAGGGACAGCAAGCAGTATGAT	NA	NA	31	0	46	0	61	0	21	11	52	0	41	0	NA	NA	64	0	67	0	26	13	52	0	33	2	29	2	42	6	41	0	40	0	109	4	66	8	96	25	42	0	39	0	28	0	NA
TP67409	TGCAGCAAACATGCGAAAGGTAAGAAAAAGTTAATTCCAACCCAATCAGAAATTAAGGCATTCA	TGCAGCAAACATGCGAAAGGTAAGAAAAAGCTAATTCCAACCCAATCAGAAATTAAGGCATTCA	41	21	16	4	50	37	65	54	56	43	58	62	25	25	22	22	119	96	57	43	51	49	29	53	67	22	13	21	17	71	139	41	59	83	39	33	22	4	NA	NA	15	32	24	25	69	49	43
TP67889	TGCAGCAAAGGCAATGGTGGTTGAAGGAGTTGCACATCTGTCAGAGGGAACCGAGAGGGACAGG	TGCAGCAAAGGCAATGGTGGTTGAAGGAGTTACACATCTGTCAGAGGGAACCGAGAGGGACAGG	39	44	81	47	94	80	155	79	80	60	46	107	67	50	41	76	315	116	60	122	186	44	109	71	99	51	87	19	148	126	63	63	89	89	87	81	121	17	197	26	62	63	59	42	97	96	68
TP67910	TGCAGCAGAGGCACTGGTGGTTGGAGGAGTTGCACATCTGTGAGCAGAAACCGAAAGGGACAGG	TGCAGCAAAGGCACTGGTGGTTGGAGGAGTTGCACATCTGTGAGCAGAAACCGAAAGGGACAGG	32	12	52	0	60	41	74	41	65	13	50	40	45	37	30	27	156	5	61	20	127	7	99	14	92	3	21	2	22	17	0	79	70	17	62	14	7	27	4	32	12	22	17	27	83	4	21
TP67938	TGCAGCAAAGGGAACAAAGACACTCAAATAATTCACTTTATGAGTTCGATATTTAGTGACATTA	TGCAGCAAAGGGAACAAAGACACTCAAATAAATCACTTTATGAGTTCGATATTTAGTGACATTA	37	0	61	0	49	0	64	4	45	0	33	0	34	0	22	0	95	0	36	4	39	4	41	0	31	0	27	0	42	2	34	0	26	0	91	0	47	0	59	0	27	0	36	0	41	0	NA
TP68006	TGCAGCAAAGTCTTTGTAATTTGCTCTTTTTCCCAGGCTCGGGCTCCGCTTGTCGCAGCATTCA	TGCAGCAAAGTCTTTGTAATGTGCTCTTTTTCCCAGGCTCGGGCTCCGCTTGTCGCAGCATTCA	52	22	66	37	46	39	151	23	88	24	121	0	59	0	25	33	134	59	72	0	56	37	46	60	62	29	64	5	133	0	99	13	79	28	54	12	48	0	114	5	42	10	39	11	110	1	24
TP68063	TGCAGTAAATACATTGTGCCGCGCATGTGTCGCGACTCGATGAGACTGGCGGCGGCGGCGTTCG	TGCAGCAAATACATTGTGCCGCGCATGTGTCGCGACTCGATGAGACTGGCGGCGGCGGCGTTCG	7	76	11	111	0	68	0	94	0	126	0	110	0	28	0	98	0	231	0	107	0	113	0	130	3	84	28	52	0	117	0	109	0	105	17	63	47	35	NA	NA	9	72	0	59	0	156	0
TP68135	TGCAGCAAATCCGAGCACAGTTTAACGAGCGTAGCTCCGATCAGTTTCCATTTGAACAAACGCC	TGCAGCAAATCCGAGCACAGTTTAACGAGCGTAGCTCCGATCAGTTCCCATTTGAACAAACGCC	19	86	66	109	36	61	23	203	56	89	24	80	10	35	11	38	162	126	27	114	70	99	35	78	38	104	5	66	10	105	33	73	2	123	8	74	31	139	0	158	18	94	59	49	28	43	55
TP68359	TGCAGCAAATTCCGACACTTTTTCAATGTCCATCACAATTTTTCCAAATGACAAATTTCGCTGT	TGCAGCAAATTCCGACACTTTTTCAATGTCCATCACAATTTTTCCAAATGACAAATTTCGCTGG	1	75	NA	NA	0	50	0	77	0	37	0	92	0	24	0	20	0	91	0	125	1	101	0	26	0	28	0	51	0	90	0	22	0	74	0	41	0	39	0	57	0	29	0	32	0	37	0
TP68391	TGCAGCAAATTCTGCTGCTACTGCTGCGGCTTCAACGATTCCGTCTACGCCCACAATGGTTTCA	TGCAGCAAATTCTGCTGCTACTACTGCGGCTTCAACGATTCCGTCTACGCCCACAATGGTTTCA	6	24	3	25	0	43	0	27	0	33	0	21	NA	NA	NA	NA	0	59	0	38	4	23	NA	NA	5	22	13	8	NA	NA	NA	NA	0	30	8	32	18	9	20	0	3	34	0	21	0	32	NA
TP68650	TGCAGCAACACAACCATGAACAGCTCCACAATGTTGGTGCCGTTGTCCGATTCGATGTTGTTGG	TGCAGCAACACAACCATGAACAGCTCCACAATGTTGGTGCCGTTGTCCGATTCGATGTTGTTGA	89	0	32	0	81	1	102	0	76	0	83	0	NA	NA	52	0	189	2	66	0	77	0	90	1	107	0	28	0	46	0	60	0	119	0	145	0	112	0	91	0	46	1	54	0	119	1	44
TP68832	TGCAGCAACAGCAAATCCAACGCCCTCCCCACTTCTCGGCCGACCATTCCCACCTCCAACAGCC	TGCAGCAACAGCAAATCCAACGCCCTCCCCACTTCTCGGCCGACCATTCCCACCTCCAAAAGCC	34	2	24	0	24	13	64	0	41	0	48	1	24	0	NA	NA	78	0	50	0	29	0	32	0	20	2	11	9	57	0	31	0	27	10	35	11	29	18	29	47	36	0	21	0	42	0	NA
TP68981	TGCAGCAACAGGCAGATATTGAAGTGCGCACGCTGCGCGCCTTTCCACAGCACGCGGCAGCCGT	TGCAGCAACAGGCAGATATTGAAGTGCGCACGCTGCGCGCCTTTCCACAGCACGCGACAGCCGT	397	0	152	0	261	0	386	119	310	36	266	0	171	5	234	0	564	0	394	0	504	196	150	0	236	0	333	136	425	83	429	5	211	6	599	14	452	134	527	48	316	3	120	0	352	0	166
TP69101	TGCAGCAACAGTTTTCGAATTTTCACGATCTTTTCTTCCGTTCCGCTCGCCGCCGATGTCCCTT	TGCAGCAACAGTTTTCGAATTTTCACGATCCTTTCTTCCGTTCCGCTCGCCGCCGATGTCCCTT	32	18	68	0	111	28	102	51	91	33	51	19	51	6	48	9	216	29	85	34	63	1	75	33	78	6	54	8	93	28	70	65	45	11	78	8	58	11	143	0	74	14	19	31	78	80	40
TP69118	TGCAGCAACATCAGCAGCCGAACAGGTTCACTATGGTGCCGTCGCCGATGCCGCGCAACCATTT	TGCAGCAACATCAGCAGCCGAACAGGTTCACCATGGTGCCGTCGCCGATGCCGCGCAACCATTT	0	56	0	27	0	59	41	112	0	116	0	65	0	34	0	74	0	154	0	45	0	161	0	67	0	65	0	36	13	48	0	64	0	35	1	73	0	77	0	20	0	66	0	26	0	105	0
TP69638	TGCAGCAACGATGGGAATGGAAGTGGAACAAGACAAACCAAAGTCGAGCAAAAAACTGCAACTA	TGCAGCAACGATGGGAATGGAAGTGGAACAAGACAAACCAAAGTCGAGCAAAAAACAGCAACTA	15	64	NA	NA	3	22	80	33	33	19	0	38	17	48	9	32	64	127	55	9	101	58	52	44	2	26	57	18	62	51	9	59	10	10	56	55	67	51	57	28	12	26	20	31	19	20	24
TP70498	TGCAGCAACTGATGCTGCTTCTGCTGCGGTTGTAATGGAAGAACAGAGTGAGTCGGTTGACTCA	TGCAGCAACTGACGCTGCTTCTGCTGCGGTTGTAATGGAAGAACAGAGTGAGTCGGTTGACTCA	0	38	0	21	12	18	0	54	2	25	0	27	NA	NA	0	21	0	76	6	34	0	52	0	37	NA	NA	NA	NA	0	37	0	21	0	29	2	41	0	21	0	28	NA	NA	0	27	8	27	NA
TP70530	TGCAGCAACTGATGGACCCCGAAATATTCACCGTTTTCCTCGCGGCTTTCACCTCAATGATTGT	TGCAGCAACTGATGGACCCAGAAATATTCACCGTTTTCCTCGCGGCTTTCACCTCAATGATTGT	41	2	61	0	77	0	33	9	45	0	35	0	20	0	23	11	63	33	68	9	41	1	40	0	40	0	NA	NA	46	17	26	13	20	2	40	20	43	5	40	0	32	6	28	10	38	23	40
TP71125	TGCAGCAAGAGGAGGGACGTCGAGAAGGACGAGGACAATGGGCGAAAAGGGAAAACATTTACAG	TGCAGCAAGAGGAGAGACGTCGAGAAGGACGAGGACAATGGGCGAAAAGGGAAAACATTTACAG	41	0	53	3	34	12	71	0	81	1	51	0	37	3	NA	NA	132	0	76	1	68	0	84	0	50	0	68	0	51	0	48	0	75	0	93	0	17	19	34	38	34	7	28	0	70	0	35
TP71152	TGCAGCAAGAGGCATCCCTTCGATTTCAACAGAAAAGAACAAACAAACCCCGAGTAACCCAACC	TGCAGCAAGAGGCATCCCTTCGATTTCAACAGAAAAGAACAAACAAACCCCAAGTAACCCAACC	30	82	0	69	7	56	72	49	35	61	0	28	14	33	NA	NA	71	207	77	47	83	14	60	37	NA	NA	48	28	84	69	5	77	29	7	56	70	78	34	150	10	20	3	NA	NA	16	34	8
TP71852	TGCAGCAAGGCCAAGTCCCACATGGCCATCACCAGCGCCACCACCCGCCGCAGCACCACCACAG	TGCAGCAAGGCCAAGTCCCACATGGCCATCACCAGCGCCACCACCCGCCGCAACACCACCACAG	4	43	0	45	0	58	2	85	0	75	0	84	10	33	0	23	0	163	0	65	0	74	0	94	12	51	10	51	5	52	0	71	0	64	26	63	8	18	23	20	0	52	NA	NA	0	60	0
TP72228	TGCAGCAAGGTTTTGTCCCGTTCCCATAACGGTTTTCCACTAATTTATGTTTTCCACCATTTCC	TGCAGCAAGGTTTTGTCCCGTTCCCATAACGGTTTTCCACTAATTTATGTTTTCCACCATTCCC	75	1	NA	NA	66	1	88	0	68	1	51	0	30	0	41	0	125	0	66	2	114	2	96	0	59	1	56	1	47	0	53	0	54	0	67	0	45	0	77	0	63	1	37	0	67	0	NA
TP72415	TGCAGCAAGTGCATGAAATAAGCAGTAGTTGTCCACGTTGTGTATACGTTTTCTTTGCGCTTCG	TGCAGCAAGTGCATGAAATAAGCAGTAGTTGTCCACGTTGTGTATACGTATTCTTTGCGCTTCG	0	121	0	26	0	55	0	73	2	67	0	67	0	85	7	16	2	100	0	68	0	131	0	74	0	40	3	88	0	140	0	61	16	57	0	74	2	139	0	139	1	81	4	45	1	61	0
TP72416	TGCAGCAAGTGCATGATGGTATGCTTTGTTTGGCAATTGTACATCTTTCTCATAAGAGGTCCCA	TGCAGCAAGTGCATGATGGTAGGCTTTGTTTGGCAATTGTACATCTTTCTCATAAGAGGTCCCA	68	5	104	0	53	0	120	0	88	0	63	0	NA	NA	46	0	148	0	82	0	75	0	81	0	72	3	41	0	51	0	48	0	49	31	65	49	55	15	86	12	42	12	57	0	70	0	29
TP72716	TGCAGCAATATAAAGGGAGGAGAGAGCGTGCATTTTAAGTTAAAAATTGGAAAATTATGGGACG	TGCAGCAATATAAAGGGAGGAGAGAGAGTGCATTTTAAGTTAAAAATTGGAAAATTATGGGACG	35	0	NA	NA	38	0	44	14	43	0	52	0	33	0	NA	NA	105	0	26	0	39	15	53	0	44	0	NA	NA	41	8	60	3	40	0	57	0	26	1	21	0	24	0	33	0	37	0	51
TP73411	TGCAGCAATGTTCGGCAGCAAATGCCACGGACAAAAACAATGAAGAAAATGTAACGAAAGGTGA	TGCAGCAATGTTCAGCAGCAAATGCCACGGACAAAAACAATGAAGAAAATGTAACGAAAGGTGA	35	3	50	1	49	54	93	8	74	0	55	0	17	30	30	0	128	0	43	48	81	4	103	3	53	18	NA	NA	36	5	85	0	57	8	42	0	25	0	NA	NA	17	7	13	15	56	4	32
TP73416	TGCAGCAATGTTCAGCAGCAAATGCCACGGACAAAAACAATGAATACAATGTCACCAAAGGTGA	TGCAGCAATGTTCAGCAGCAAATGCCACGGACAAAAACAATGAAGACAATGTCACCAAAGGTGA	0	37	0	22	0	52	0	60	0	27	0	36	0	20	0	27	0	66	2	24	0	69	0	55	0	45	NA	NA	0	54	0	42	NA	NA	2	40	12	26	19	29	6	28	NA	NA	0	62	0
TP73777	TGCAGCAATTGGATTTGCTGCGCCACCAACAACAACGGATTCACACCGACAGAAGAATTGTTGT	TGCAGCAATTGGATTTGCTGCGCCACCAACAACAACGGATTCACACCGACAGAAGAATTGTTGG	0	92	0	40	0	166	0	245	0	171	0	168	0	47	1	94	0	313	0	97	0	172	0	167	0	114	0	113	0	148	0	168	0	172	0	217	1	179	0	101	0	136	0	85	0	149	0
TP73831	TGCAGCAATTTCCTAAAGTGCAGCACATTTGAACAAATCTAATCAGTTTATCTGGTCAGCTGAT	TGCAGCAATTTCCTAAAATGCAGCACATTTGAACAAATCTAATCAGTTTATCTGGTCAGCTGAT	51	0	27	0	43	0	133	11	74	0	24	0	NA	NA	50	0	179	0	61	0	79	17	39	0	34	0	48	17	83	13	26	0	33	0	68	0	65	0	53	0	29	0	22	0	56	0	24
TP73842	TGCAGCAATTTCCTTGCGTACTCTTCGACGAAGTGGCGCAGTCGCGTGTAGAGCTCCTCGCCGA	TGCAGCAATTTCCTTGCGTACTCCTCGACGAAGTGGCGCAGTCGCGTGTAGAGCTCCTCGCCGA	24	53	21	47	29	38	100	57	38	29	40	54	30	33	44	42	74	92	52	93	35	76	16	46	31	25	21	33	25	41	41	41	16	42	22	58	19	63	0	34	56	23	7	17	16	43	23
TP73845	TGCAGCAATTTCCTTGCGTACTCCTCGATGAAGTGGCGCAGTCGCGTGTAGAGCTTCTCGCCGT	TGCAGCAATTTCCTTGCGTACTCCTCGATGAAGTGGCGCAGTCGCGTGTAGAGCTCCTCGCCGT	91	6	98	3	149	35	191	5	127	38	51	60	46	10	87	47	241	156	162	16	71	2	27	16	95	12	51	12	96	10	126	0	111	27	122	26	21	0	NA	NA	61	25	66	55	136	21	79
TP73854	TGCAGCAATTTCGGCAATTGTTCTGAGCAATTCTCGGTTGAAAGCACGGTCCATCTCTGCAAAG	TGCAGCAATTTCGGCAATTGTTCTGAGCAATTCTCGGTTGAAAGCACGGTCCATCTCTGCAAAA	2	27	NA	NA	1	47	3	77	0	46	0	40	2	26	1	53	4	102	0	61	6	41	3	39	3	19	0	41	5	50	1	33	1	44	2	26	1	38	1	52	0	38	0	28	1	64	3
TP73955	TGCAGCAATTTTTCGCGCATTTGGTCACGCGTCAACACCCATTTTTGTAAAAAATATTCTAAAT	TGCAGCAATTTTTCGCGCATTTGGTCACGCGTCAAAACCCATTTTTGTAAAAAATATTCTAAAT	35	1	23	0	30	2	31	1	34	11	32	15	18	7	21	8	31	3	31	41	NA	NA	45	1	19	2	15	13	27	4	39	52	33	3	30	0	29	6	NA	NA	23	3	19	3	45	6	23
TP73966	TGCAGCACAAAAAGGGGACATGAGAAAAGACGGAAGCACGCAACTTTTTACCATGGAGGTAAAA	TGCAGCACAAAAAGGGGACATGAGAAAAGACGGAAGCACGCAACTTTTTACCACGGAGGTAAAA	0	36	0	41	0	45	31	49	4	44	0	30	0	29	0	26	2	85	0	56	18	38	0	75	0	34	NA	NA	5	31	0	49	0	33	0	41	19	33	0	34	0	29	0	24	0	47	0
TP74015	TGCAGCACAAAGCGTTCCGCAACCGAACTGATGATGGGCGGTGTTGCAGCGTTGCCAATTGCGC	TGCAGCACAAAGCGTTCCGCAACCGAACTGATGATGGGCGGTGTTGCAGCGTTGCCAATTACGC	26	8	15	41	20	9	42	16	25	7	38	11	27	14	NA	NA	96	20	27	12	34	29	24	13	20	8	17	13	46	15	18	13	14	19	27	23	25	11	5	15	23	12	10	12	33	11	13
TP74056	TGCAGCACAACAACATGTGCACAGGTCTCCGCCGCCTGTCATTGTTCGGTTGGGCAACGGCGGT	TGCAGCACAACAACATGTGCACAGGTCGCCGCCGCCTGTCATTGTTCGGTTGGGCAACGGCGGT	2	199	2	177	4	134	5	323	1	120	0	134	1	95	0	93	3	405	5	141	6	234	2	246	4	136	2	129	1	208	2	137	1	167	3	250	2	160	0	179	0	164	2	109	1	197	1
TP74075	TGCAGCACAGCACCAACCCTTGTGGACAAGGTGACACCGTTGAGTGAAAGGTGTAACTTGGCTG	TGCAGCACAACACCAACCCTTGTGGACAAGGTGACACCGTTGAGTGAAAGGTGTAACTTGGCTG	24	87	18	131	28	107	4	136	3	109	38	193	26	73	14	145	28	467	45	71	32	165	34	116	19	179	54	85	24	215	10	142	13	82	74	100	66	28	147	43	36	103	12	53	36	177	6
TP74112	TGCAGCACAACCACCACCAGAACCATCAACAACAGCACAGAACGGTCATCCCAACGGCGGTCTC	TGCAGCACAACCACCACCAGAACCATCAACAACAGCACAGAACGGCCATCCCAACGGCGGTCTC	33	0	23	0	46	0	44	4	38	0	33	0	28	0	25	0	96	0	57	0	58	2	46	0	27	0	31	0	28	0	NA	NA	48	0	42	4	10	12	34	3	32	0	20	0	33	0	NA
TP74173	TGCAGCACAACGACATGCGTTTTTTAGGAAGTCGCCATAAACGTCGTTTTTTTCTGACCACTTT	TGCAGCACAACGACATGCGTTTTGTAGGAAGTCGCCATAAACGTCGTTTTTTTCTGACCACTTT	63	0	105	0	49	0	112	21	118	0	81	0	65	0	48	0	211	0	118	0	97	20	92	0	62	7	76	2	125	25	96	0	92	21	112	15	69	7	42	37	39	8	49	0	109	0	52
TP74494	TGCAGCACACCATCCTCCCCTTCCGTGGTGATTAAAGAGCCAGACACCCCACGATCGTGCCCAT	TGCAGCACACCATCCTCCCCTTCCGTGGTGATTAAAGAGCCAGACACCCCACGATCATGCCCAT	4	64	1	59	0	45	0	144	0	79	0	73	8	40	0	38	13	207	36	26	0	86	0	83	0	81	6	56	0	78	0	66	0	55	5	81	41	47	16	76	17	65	0	57	0	116	0
TP75025	TGCAGCACAGGATTCTTAGGGTAACTTTTTAAAAAGACGAACTCTTGCCAAAGAATTTTCAATA	TGCAGCACAGGATTCTTAGGGTAACTTTTTAAAAAGACGAACACTTGCCAAAGAATTTTCAATA	62	25	54	42	43	24	67	38	83	35	49	36	24	7	47	18	79	35	22	13	75	33	70	46	40	12	18	5	46	31	63	23	69	14	34	19	22	6	NA	NA	22	18	48	25	88	38	56
TP75777	TGCAGCACCAGCAGCAGCAGTAGCAGCAGCCTTACGCGACACTGAGCAGAGGAAACGACAAGCC	TGCAGCACCAACAGCAGCAGTAGCAGCAGCCTTACGCGACACTGAGCAGAGGAAACGACAAGCC	142	0	69	0	NA	NA	142	46	106	0	70	0	37	0	27	0	350	0	178	0	192	38	45	0	68	0	104	13	57	69	90	0	54	0	250	0	230	0	200	0	75	0	NA	NA	71	0	43
TP77051	TGCAGCACCATCGTCTTTGTTGTTCGGCTTTTTTCCATTTTGCTTATTCCCGTCGTCGACAAAA	TGCAGCACCATCGTCTTTGTTGTTCGGCTTTTTTCCATCTTGCTTATTCCCGTCGTCGACAAAA	19	18	0	21	7	30	1	81	44	7	7	15	10	17	49	9	11	88	2	24	39	21	5	65	5	18	8	24	0	33	42	2	15	25	31	53	8	40	0	41	10	31	5	22	13	57	NA
TP77211	TGCAGCACCATTACTGGTGACCGCAGTCTGTTCAAATGTCGCGCGGCGCATCGCACGGGCAACG	TGCAGCACCATTACTGATGACCGCAGTCTGTTCAAATGTCGCGCGGCGCATCGCACGGGCAACG	47	19	36	75	45	69	42	88	50	48	64	23	31	19	45	13	136	55	98	47	66	141	62	23	57	51	24	31	57	76	54	39	40	18	48	75	11	82	33	82	46	45	36	13	39	75	58
TP77409	TGCAGCACCCATTGACAATTCCTTCCAGCCAAAGCATTTGACAGCGGTTGCCAATTTGGACGAT	TGCAGCACCCATTGACAATTCCTTCCAGCCAAAGCATTTAACAGCGGTTGCCAATTTGGACGAT	87	6	56	23	111	0	60	25	77	26	133	5	40	15	81	2	187	0	53	44	45	53	113	0	60	11	38	31	142	19	81	0	71	3	88	16	99	20	29	48	46	13	74	17	118	0	37
TP77825	TGCAGCACCCTGGGCAACAGCGGGCGTAGTGATTAGGACATACTCGTTGTCGTTGGGTAAAATT	TGCAGCACCCTGGGCAACAGCGGGCGTAGTGATTAGGACAAACTCGTTGTCGTTGGGTAAAATT	0	35	NA	NA	0	23	103	192	0	101	0	83	0	45	0	21	0	169	0	224	0	211	0	174	0	103	17	155	20	115	0	33	20	103	55	290	9	176	26	283	9	95	0	79	0	74	0
TP77871	TGCAGCACCGAAGCGGTGGTCGTTGGTGCGCCACTGCCGCCGCCGCTCGTCACAGCGACCGTGG	TGCAGCACCGAAGCGGTGGTCGTTGGTGCGCCACTGCCGCCGCCGCTCGTCACAGCGACCGTGC	52	0	34	0	53	0	92	0	27	0	34	0	22	0	40	0	106	0	68	0	95	0	65	0	21	0	NA	NA	37	0	52	0	55	0	39	0	34	0	NA	NA	55	0	30	0	65	0	41
TP81383	TGCAGCACGACTACATCTCTATGGAATTTTAAAGAAAGTGGCAGACACACCGAAATGTGAAGTT	TGCAGCACGACTACATCTCTATGGAATTTTAAAGAAAGTGGCAGACACACCGAAATGCGAAGTT	12	41	8	42	30	50	26	71	20	47	13	35	4	32	16	34	39	106	18	64	10	80	14	28	20	36	24	24	24	36	15	44	26	49	45	37	18	68	15	40	25	25	7	25	8	70	7
TP83832	TGCAGCACGGAGCCCGAGGAAAGAGATGCGGGTGCCGATTCTGGAAAATAAGTTATTGTTTAAC	TGCAGCACGGAGCCCGAGGAAAGAGACGCGGGTGCCGATTCTGGAAAATAAGTTATTGTTTAAC	0	21	21	59	43	105	0	108	27	56	35	31	23	44	12	40	13	115	39	40	20	132	30	47	39	77	7	78	4	94	2	84	10	15	33	155	69	123	54	129	56	35	12	33	48	83	35
TP86249	TGCAGCACTCATCGTGTCGTTGCTGCATGGATTGAAGAGGCTGCTGCTGAACTGCTCGAACTCC	TGCAGCACTCATCGTCTCGTTGCTGCATGGATTGAAGAGGCTGCTGCTGAACTGCTCGAACTCC	0	31	0	20	0	41	0	77	0	56	0	37	0	22	0	61	0	88	0	54	1	50	0	49	0	26	0	20	0	44	0	44	0	30	0	58	0	76	NA	NA	0	42	1	32	0	24	NA
TP86737	TGCAGCACTTCATGATAGAGCAAACACAGCAAATTCCACCGATTGATTTTGGGGTTTTCGTCTT	TGCAGCACTTCATGATAGAGCAAACACAGCAAATTCCACCGATTGATTTTGGGGGTTTCGTCTT	44	0	79	0	56	0	181	0	50	0	39	0	29	0	73	0	141	0	80	0	94	0	71	0	59	0	29	12	126	0	62	0	39	0	60	0	75	0	27	0	42	0	NA	NA	61	15	69
TP87173	TGCAGCACTTTTTGTTGCTTTTTCATTGTTCTCAATTGTCCATTTGTTCACACTTGAGCACCCG	TGCAGCACTTTTTGTTGCTTTTTCACTGTTCTCAATTGTCCATTTGTTCACACTTGAGCACCCG	69	7	60	0	124	0	126	49	81	9	94	0	48	18	64	0	205	0	27	55	131	9	92	0	77	6	65	2	117	55	90	0	65	14	69	34	98	49	56	7	28	4	34	0	128	0	78
TP87198	TGCAGCAGAAAAGAAGAGAAAAGAGTCTGAGGAGAAGAAGGCTCAGAAGGATGCCGAGGCTAAA	TGCAGCAGAAAAGAAGAGAAAAGAGGCTGAGGAGAAGAAGGCTCAGAAGGATGCCGAGGCTAAA	0	181	0	125	0	215	30	93	13	103	0	323	0	95	0	35	5	115	0	247	65	145	0	205	0	102	8	17	29	88	0	51	0	30	0	162	0	22	NA	NA	0	49	0	124	0	162	0
TP87349	TGCAGCAGAACAATGCAACGACAAAGGATCATCTGCTTAAGGGAGGGAGGGCAAAAGTGACGAC	TGCAGCAGAACAATGCAACGACAAAGGATCATCTGCTGAAGGGAGGGAGGGCAAAAGTGACGAC	0	102	1	126	9	117	0	169	0	89	0	101	0	43	12	82	0	286	0	90	12	122	0	151	0	84	26	45	0	83	0	76	0	59	0	97	0	156	0	65	0	136	0	70	16	73	0
TP87367	TGCAGCAGAACACCTGCAAATACTTAAGTTCAGTGAAATGGGGAGGGATAGCAAAGGACAGAAT	TGCAGCAGAACACCTGCAAATACTTAAGTTAAGTGAAATGGGGAGGGATAGCAAAGGACAGAAT	30	28	0	82	0	65	25	99	1	35	0	66	0	79	0	67	0	39	0	116	11	80	0	43	7	50	7	44	32	65	0	53	1	34	66	15	48	35	67	19	18	28	0	42	0	49	0
TP87406	TGCAGCAGAACCAGCAGCACGAGAAGCTGAAGGAGGAGTATGAGAAGCAGGACGAGGATGCTGA	TGCAGCAGAACCAGCAGCACGAGAAGCTGAAGGAGGAGTATGAGAAGCAGGACGAGGACGCTGA	0	34	1	125	0	96	23	96	4	78	0	113	0	40	0	58	0	152	0	113	35	52	0	115	1	50	4	77	20	99	0	75	0	66	45	110	28	53	23	59	2	32	0	58	0	110	0
TP87657	TGCAGCAGAATAGTGGGCCAAACATCGCAAAATTCGGGGCGTAATAATAATAAATGAGCGAGAC	TGCAGCAGAAGAGTGGGCCAAACATCGCAAAATTCGGGGCGTAATAATAATAAATGAGCGAGAC	23	38	0	66	0	74	0	113	0	98	0	48	0	23	0	103	0	251	33	21	0	67	0	85	0	64	7	26	0	76	0	43	33	59	8	144	11	76	49	72	8	51	0	42	0	89	0
TP87715	TGCAGCAGAAGCATGGCAGCACCCACTTCTGTCCGTCAATGCTTTTGTGGTCTTCCGCCAGTTG	TGCAGCAGAAGCATGGCAGCACCCACTTCTGTCCGTCAATGCTTTTGTGGTCTTCCGCCAGTTC	14	143	39	158	35	183	38	217	16	109	15	93	17	93	19	69	63	330	36	150	39	218	16	153	11	124	18	61	46	217	23	139	13	158	13	142	18	123	16	82	19	110	13	61	26	196	8
TP87779	TGCAGCAGAAGCTTAACAGATAAGGAGTTCCAAAATTTCAAGGGTCTGTTAAGACGCACGAATA	TGCAGCAGAAGCTTAACAGATAAGGAGTTCCAAAATTTCAAGGGTCTGTTAAGACGCACAAATA	13	62	27	73	16	63	13	119	10	66	28	80	8	53	2	65	37	124	8	90	41	187	10	84	0	71	5	51	8	94	3	74	11	106	3	98	0	112	0	70	6	34	5	64	4	52	9
TP87864	TGCAGCAGAAGGGGCGATAAATACGGGTGCGATGGGATGGATTTGGCAACGAAAGGGGCGAGCG	TGCAGCAGAAGGGGCGATAAATACGGGTGCGATGGGATGGATTTGGCAACGAAAGGAGCGAGCG	33	3	11	23	23	7	34	4	35	10	26	13	NA	NA	17	8	97	2	1	42	23	15	25	0	34	0	12	10	26	9	NA	NA	NA	NA	65	0	23	0	41	0	27	0	NA	NA	37	5	NA
TP87879	TGCAGCAGAAGGGTAACTAATTTGTAGTGGAAATTGCGGCCGAAATTCGTATTTTTAGTCTCTT	TGCAGCAGAAGGGTAACTAATTTGTAGTGGAAACTGCGGCCGAAATTCGTATTTTTAGTCTCTT	96	8	40	88	49	40	110	23	29	22	76	42	42	18	59	23	107	57	40	49	86	32	24	57	71	19	44	0	126	19	38	57	61	26	90	17	163	2	97	0	41	41	25	5	69	24	23
TP87987	TGCAGCAGAATGCGCCCCTAAGCGGCTTCAGCTCTCAGCTGCTTCAGCCGACCATCGCTTCTTC	TGCAGCAGAATGCGCCCCTAAGCGGCTTCAGCTCTCAGCTGCTTCAGCCGACAATCGCTTCTTC	29	60	3	24	6	93	41	91	18	68	0	67	0	65	0	70	0	215	26	41	36	59	0	91	10	81	23	37	24	54	11	66	41	38	142	20	69	9	40	27	20	25	25	30	3	108	0
TP88091	TGCAGCAGACAGAACACCACACACATTTGCACACATATTGTTTTGCGGTCATTGACACAAATGG	TGCAGCAGACAGAACACCACACACATTTGCACACATATTGTTTTGCGGTCATTGACACAAATGC	38	0	61	0	22	0	81	0	29	0	38	0	21	0	23	1	85	0	25	0	62	0	35	0	36	0	NA	NA	50	0	34	0	28	0	42	0	37	0	44	1	58	0	34	0	39	0	25
TP88715	TGCAGCAGACTGCCCAGCTGGCTGTTTGAGCGTGTCTCGCAGTTGCCTTTGCTGAACGGAGGTG	TGCAGCAGACTGCCCAGCTGGCTGTTTGAGCGTGTCTCGCAGTTGCCTTTGCTGAACGCAGGTG	22	0	52	0	37	10	50	6	22	8	27	0	30	5	NA	NA	86	1	32	4	52	0	44	3	30	0	23	3	45	10	NA	NA	20	0	43	4	26	20	22	3	30	11	22	0	53	0	NA
TP88819	TGCAGCAGAGAGTGAGTGTTCATGAAAAATCGTTTTGGTCTCAAAAACTGGTCAGAAATTGGCA	TGCAGCAGAGAGTGAGTGTCCATGAAAAATCGTTTTGGTCTCAAAAACTGGTCAGAAATTGGCA	47	10	23	62	39	12	41	4	13	17	19	12	16	8	25	5	59	67	20	13	6	42	49	18	26	22	NA	NA	36	13	0	37	NA	NA	17	15	NA	NA	NA	NA	26	7	18	10	21	11	9
TP89035	TGCAGCAGAGGAACAGAAGGGACAGCAAATTCAGCAGGTGACTGACTGGCGAACCACTAATTAA	TGCAGCAGAGGAACAGAAGGGACAGCAAATTCAGCAGGTGACTGACTGACGAACCACTAATTAA	167	0	200	0	240	0	266	17	172	3	158	0	80	0	141	0	542	0	151	0	210	11	140	0	167	0	141	0	240	16	119	0	64	0	320	0	195	0	133	0	169	0	117	0	168	0	128
TP89046	TGCAGCAGAGGAGCAAAAGTGACGGCAAACAGCAACAGAGGGAGCGGCAGCAAACGCTGGGCGC	TGCAGCAGAGGAGCAAAAGCGACGGCAAACAGCAACAGAGGGAGCGGCAGCAAACGCTGGGCGC	0	66	6	83	22	89	0	147	0	85	0	84	0	34	0	61	0	173	0	74	0	148	0	91	0	46	0	54	0	86	0	103	0	39	4	111	0	97	0	96	0	44	6	54	0	84	0
TP89052	TGCAGCAGAGGCAATGGTGCTTGTACGAGTTTCATATCAGTGAGCGGAAGCCGAAAGGGACTGG	TGCAGCAGAGGCAATGGTGCTTGGACGAGTTTCATATCAGTGAGCGGAAGCCGAAAGGGACTGG	NA	NA	45	0	18	8	83	0	24	0	26	0	NA	NA	NA	NA	21	24	42	0	34	0	NA	NA	NA	NA	32	7	35	4	NA	NA	47	0	51	0	50	11	105	0	26	0	NA	NA	NA	NA	27
TP89518	TGCAGCAGATCCGCCCGTTCGTGCGTTATTCGGCTCGCCAGGCAAACCAATGCCCTGGGCGAGT	TGCAGCAGATCCGCCCGTTCGTGCGTTATACGGCTCGCCAGGCAAACCAATGCCCTGGGCGAGT	55	59	32	29	16	90	84	47	41	24	45	26	45	13	27	73	154	74	69	48	98	70	44	42	96	16	73	10	100	60	1	82	38	5	97	69	107	31	62	0	61	3	10	45	52	73	62
TP90117	TGCAGCAGATGCGCGGAAAATCGGCGGAAGCCGAAGAGCAGCTGCAAAAGGGGGATGACGCTGC	TGCAGCAGATGCGCGGAAAATCGGCGGAAGCCGAAGAGCAGCTGCAAAAGGGGGACGACGCTGC	1	44	0	42	0	29	0	74	1	52	0	34	NA	NA	0	34	3	119	28	23	5	66	0	23	0	40	0	21	0	64	0	39	0	54	0	89	0	57	0	39	NA	NA	NA	NA	0	64	18
TP90542	TGCAGCAGATTTTTTGAGTGCTGATCCGCAGATCCATGTCAGGTCTACGCAAAAATGTTGCTAT	TGCAGCAGATTTTTGGAGTGCTGATCCGCAGATCCATGTCAGGTCTACGCAAAAATGTTGCTAT	1	120	1	155	1	197	1	230	1	110	2	108	0	70	0	69	0	342	0	147	1	208	0	301	0	96	1	73	0	145	1	119	1	92	0	163	3	101	0	100	1	55	0	70	0	89	0
TP90564	TGCAGCAGATTTTTTGGAGTGCTGATCCGCAGGTCCATGTCAGGTCTATGCAAAAATGTTGCAA	TGCAGCAGATTTTTTGGAGTGCTGATCCGCAGGTCCATGTCAGGTCTACGCAAAAATGTTGCAA	0	496	3	1212	38	703	38	1220	9	822	0	803	7	463	13	542	12	1758	22	647	34	1096	10	656	5	593	26	531	30	1123	0	905	5	580	60	1315	80	989	43	593	5	413	0	366	0	727	10
TP90565	TGCAGCAGATTTTTTGGAGTGCTGATCCGCAGGTCCATGTCAGGTCTATGCAAAATGTTGCAAT	TGCAGCAGATTTTTTGGAGTGCTGATCCGCAGGTCCATGTCAGGTCTACGCAAAATGTTGCAAT	0	24	1	55	18	24	5	51	2	31	0	33	1	24	7	14	0	72	6	39	8	35	7	41	NA	NA	11	38	5	32	0	50	4	29	16	67	13	29	9	34	NA	NA	NA	NA	0	21	1
TP90585	TGCAGCAGCAAAAACCCATTGATGCGAGATGATTTTCGCCAATTGCCTTCCTCTAATGGACTCG	TGCAGCAGCAAAAAACCATTGATGCGAGATGATTTTCGCCAATTGCCTTCCTCTAATGGACTCG	90	0	63	1	120	2	183	1	193	2	135	4	62	2	35	0	258	5	156	2	176	2	135	3	114	3	74	4	189	8	117	1	121	2	185	7	123	2	169	1	111	0	81	1	168	3	115
TP90588	TGCAGCAGCAAAAAAGCAATCCGCAGATCAACCAGCGCAAGTTTCTGCTCACATTCCTCTGAAG	TGCAGCAGCAAAAAAGCAATCCGCAGATCAACCAGCGCAAGTTTCTGCTAACATTCCTCTGAAG	38	0	24	1	34	1	44	30	31	2	24	0	NA	NA	32	0	61	0	53	0	52	0	65	0	31	0	29	3	47	8	28	9	28	2	37	3	22	14	18	12	NA	NA	NA	NA	37	0	NA
TP90662	TGCAGCAGCAAATGCAGGAGATCCTTTCCGATGACGAAGTCCCTCATCCCATCCTTTTGACTCG	TGCAGCAGCAAATGCAGGAGATCCTTTCCGATGACGAAGTCCCTCACCCCATCCTTTTGACTCG	0	73	22	55	39	44	30	123	16	74	61	42	21	10	NA	NA	50	72	13	71	71	36	19	51	4	42	19	32	37	82	29	55	27	35	3	117	17	56	8	79	4	60	8	39	21	69	0
TP90664	TGCAGCAGCAAATGTTTCTGCTCACTGATTTGTCGGTTGACCAATCAATGGACTGACTGACCGT	TGCAGCAGCAAATGTTTCTGATCACTGATTTGTCGGTTGACCAATCAATGGACTGACTGACCGT	76	9	107	0	144	0	134	0	143	3	139	0	58	0	72	0	195	11	83	17	125	0	130	0	97	0	72	8	148	0	104	0	96	0	115	0	183	0	103	0	49	0	58	0	102	0	94
TP90676	TGCAGCAGCAACAACAACTCCAACAACAACGATTCTGTAGCGCGTTGACTCCGACAACTTCGGC	TGCAGCAGCAACAACAACTCCAACAACAACGATTCTGTAGCGCGTTGACTCCGACAACTTCGCC	31	0	47	0	52	1	67	0	38	0	53	1	NA	NA	41	0	121	1	57	1	28	0	64	0	32	0	NA	NA	37	1	21	0	21	0	42	0	NA	NA	NA	NA	36	0	27	0	38	1	NA
TP90686	TGCAGCAGCAGCAACAATTGCAATACGCAAATGGCCTTTGAGAGGGAAGGGGCGAAGGACAAAC	TGCAGCAGCAACAACAATTGCAATACGCAAATGGCCTTTGAGAGGGAAGGGGCGAAGGACAAAC	45	18	14	16	43	4	97	9	79	8	58	19	23	7	29	2	120	0	42	6	49	53	52	39	37	6	19	8	47	2	3	37	33	36	53	31	59	11	35	14	40	7	NA	NA	41	19	29
TP90704	TGCAGCAGCAACAACGTTCGGCACAAATCACGGCACATCAGCTGCGACAACAGTGTTCGCCTCC	TGCAGCAGCAACAACGTTCGGCACAAATCACGGCACATCAGCTGCAACAACAGTGTTCGCCTCC	0	126	0	157	0	184	0	245	0	153	0	166	0	73	0	144	0	280	0	158	0	219	0	110	0	192	0	81	0	220	0	105	0	108	0	291	0	192	0	154	0	97	0	92	0	210	0
TP90732	TGCAGCAGCAACAGCAACACACAGTCGGCCACCGACCGCTGTCCTCGCCAAATTCACACGCCCC	TGCAGCAGCAACAGCAACACACAGTCGGCCACCGACCGCTGTCCTCGCCAAATCCACACGCCCC	122	11	198	36	157	30	130	201	110	97	191	15	36	26	67	29	403	127	33	137	70	102	195	28	139	15	53	38	45	166	106	16	114	72	219	103	36	142	48	253	101	50	136	28	120	57	106
TP90866	TGCAGCAGCAACTGCAATTGGGAAGACGGGCTCGGGCGATTGCCAGAGCGTGGCAAAATCCCGA	TGCAGCAGCAACTGCAATTGGGAAGACGGGCTCGGGCGATGGCCAGAGCGTGGCAAAATCCCGA	0	139	0	291	2	253	85	479	8	299	0	293	0	191	0	164	0	796	0	305	103	355	1	333	0	366	70	169	29	345	0	224	0	161	0	289	0	210	0	152	0	118	0	109	0	216	0
TP91060	TGCAGCAGCACAAAGGCATCGTTTACACGTACGGCTGGCAAATAACGGCACTTTTCTTCCCTTT	TGCAGCAGCACAAAGGCATCGTTTACACGTACGGCTGGCAAATAACGGCACTTTTCTCCCCTTT	47	0	53	1	38	5	24	40	40	9	48	0	40	5	20	0	71	15	4	34	51	15	65	0	45	4	11	19	17	36	58	0	36	10	38	21	7	45	22	36	37	17	50	0	46	10	30
TP91900	TGCAGCAGCACTGATCAGTTGATCAGTAGCAGAAGCAGCACACACTCAGTCCGTTGGGAGTGCG	TGCAGCAGCACTGATCAGTTGATCAGTAGCAGAAGCAGCACACAATCAGTCCGTTGGGAGTGCG	4	87	67	11	77	32	67	95	33	33	94	13	18	38	8	58	187	59	29	25	22	79	76	12	57	16	8	51	59	75	17	120	28	68	8	124	7	90	0	48	31	54	33	10	30	57	16
TP92089	TGCAGCAGCAGATGATGTCGCCCAACTCGCAGCAGCAACAGCACATCACTCCGCCTCCGTATGT	TGCAGCAGCAGATGATGTCGCCCAACTCGCAGCAGCAACAGCACATCACTCCGCCTCCATATGT	90	0	106	11	144	0	205	0	138	9	161	0	80	0	113	20	339	7	109	1	146	0	104	0	113	0	100	0	176	0	152	0	141	0	157	4	94	0	127	0	67	0	68	0	108	0	35
TP92268	TGCAGCAGCAGCAGCGGCAGCTATCGTATTCGCCGATACAGTAGCCGATGAGAGTTGATGATGT	TGCAGCAGCAGCAGCGGCAGCTATCGTATTCGCCGATACAGTAGCCGATGAGAGTTGATGATGG	0	103	0	119	0	139	0	266	1	139	0	76	0	87	0	94	0	354	3	134	1	112	0	51	0	93	0	47	0	164	0	126	0	76	0	172	0	62	0	35	1	82	0	63	1	185	0
TP92405	TGCAGCAGCAGCGCCAACGACTGCCCATCGCAAAATGTCGCAACCATTTGCTGTACCTTTGCGG	TGCAGCAGCAGCGCCAACGACTGCCCATCGCAAAATGTCGCAACCATTTGCTGTACCTTTGCGA	2	25	NA	NA	2	60	3	81	3	61	2	83	NA	NA	1	23	7	171	3	75	1	42	0	26	1	49	0	21	1	56	3	92	1	38	3	71	0	26	NA	NA	0	36	NA	NA	4	68	0
TP93057	TGCAGCAGCAGGGGACATGCCTCACCATATTTACTCCCCCTCCCTCTGGATTTATTGGCCAGTG	TGCAGCAGCAGGGGACATGCCTCACCATATTTACTCCCCCTCCCTCTGGACTTATTGGCCAGTG	0	22	0	87	0	54	73	88	8	71	0	37	0	61	0	52	0	75	0	33	50	52	0	36	0	86	50	63	131	56	NA	NA	0	24	0	83	0	116	0	83	0	59	0	83	0	87	0
TP93402	TGCAGCAGCATCAGAAGATTGGGCCAATGCTTGATCGAATCAGCACAATTGAAACTGCTGGGTT	TGCAGCAGCATCAGAAGATTGGGCCAATGCTTGATCGAATCAGCACAATTGAAACTGCTGGGGT	0	47	0	61	0	62	1	97	2	59	0	40	0	23	0	49	0	136	0	56	0	57	0	53	0	78	0	63	1	96	0	35	1	27	0	76	1	50	0	56	0	49	1	45	2	37	0
TP93715	TGCAGCAGCATTCGCTGTCAGCTGTTGTTGCTGCTGCTGGTTTAGCAGATGTCCTTAAGCGTCA	TGCAGCAGCATTCGCTGTCAGCTGTTGTTGCTGCTGCTGATTTAGCAGATGTCCTTAAGCGTCA	33	19	69	2	66	9	141	0	133	0	111	0	60	1	71	4	211	1	64	22	113	0	135	0	44	0	52	12	108	0	94	7	100	5	33	60	2	56	6	42	68	17	57	0	94	0	64
TP93730	TGCAGCAGCATTGACGTGGCGATGATGGATATGGACGGAGCGGACGAAGCGGCGACACAGCGCC	TGCAGCAGCATTGACGTGGCGATGATGGATATGGACGGAGCGGACGAAGCGGCGACACAGCACC	8	35	NA	NA	27	23	65	6	42	42	15	34	34	10	4	37	21	84	30	0	52	5	23	30	2	29	37	0	81	22	47	0	38	6	86	10	60	8	29	0	NA	NA	6	28	16	30	30
TP94491	TGCAGCAGCCGCAGCACCTCAACATCCAGAGCGGCGGCAGGACAAAGACAAATCCGAAAAAAAA	TGCAGCAGCCGCAGCACCTCAACATCCAGAGCGGCGGCAAGACAAAGACAAATCCGAAAAAAAA	0	85	0	51	0	103	1	173	0	90	0	78	0	68	0	64	2	179	3	115	3	129	14	101	0	52	0	83	0	142	0	86	0	70	2	119	4	93	10	68	5	89	0	42	0	71	0
TP94831	TGCAGCAGTCGTTGGCGGTGCAGGACCATCTGCGCAAGCGCCACCACCCGTCGGACAGCCCCCG	TGCAGCAGCCGTTGGCGGTGCAGGACCATCTGCGCAAGCGCCACCACCCGTCGGACAGCCCCCG	0	23	0	26	0	32	6	40	0	33	0	22	0	20	NA	NA	0	69	0	44	14	41	0	35	0	33	0	25	13	21	0	40	0	20	1	38	NA	NA	0	49	NA	NA	NA	NA	0	27	NA
TP96881	TGCAGCAGCGCTATTGGGGCAAAATCCATCGGCGGACGCCCACACCAAAGATGTCGTCCGCTTC	TGCAGCAGCGCTATTGGGGCAAAATCCATCGGCGGACGCCCACACCAAAGACGTCGTCCGCTTC	0	27	28	0	27	27	62	34	14	17	24	56	NA	NA	11	19	74	123	7	44	17	15	14	34	3	32	33	2	44	32	25	19	28	26	27	45	21	51	27	18	10	37	7	27	5	44	0
TP97779	TGCAGCAGCGGTTCGTCCACGTCGAGCAGTATACTGAAGGAGATTCGGCAACACTTTCGATGTT	TGCAGCAGCGGTTCGTCCACGTCGAGCAGTATACTGAAGGAGATTCGGCAACACTTTCGATGGT	0	153	0	95	1	156	1	126	0	111	0	71	0	75	0	80	0	334	0	0	0	112	0	133	0	111	1	78	0	96	NA	NA	1	138	0	120	0	88	0	143	0	130	0	82	1	167	1
TP97831	TGCAGCAGCGTCACATGGCGTCGCACATACGTAGTGGACAGCGAGCATGTGGACGAGCGCAACG	TGCAGCAGCGTCACATGGCGTCGCACATACGTGGTGGACAGCGAGCATGTGGACGAGCGCAACG	0	96	0	91	0	23	17	128	0	84	0	85	0	49	0	58	8	234	0	122	5	164	0	115	7	94	4	110	33	116	0	88	22	101	70	70	34	70	67	40	0	83	0	56	0	134	0
TP99035	TGCAGCAGCTCGGCGGCGTCGTTGTCGCCCGACGTTGGGCCAACCCGTGCCGTGCCAAAGTTGG	TGCAGCAGCTCGGCGGCGTCGTTGTCGCCCGACGTTGGGCCAACCCGTGCCGTGCCAAAGTTGC	53	0	NA	NA	44	1	74	0	43	0	67	0	30	0	53	0	122	4	79	1	80	3	46	0	52	3	33	0	43	0	44	1	35	2	73	0	40	0	36	0	35	0	24	0	69	1	31
TP99331	TGCAGCAGCTGAGCATTTGCGGGGCCCACGACACGGCCCATCAGCTGACCGCCGACTCTGCCAC	TGCAGCAGCTGAGCATTTGCGGGGCCCACGACACGGCCCATCAGCTGACCGCCGACTCGGCCAC	49	0	NA	NA	28	58	6	76	21	27	28	51	21	28	2	60	13	152	20	41	5	78	7	27	18	10	1	64	6	47	0	57	21	57	0	48	0	69	5	58	19	36	12	21	32	27	16
TP99363	TGCAGCAGCTGATCAATGGGCAGCGTCCGCGGGGGAAAGCCCAAAGCGACGAGCGATTCGCTGG	TGCAGCAGCTGATCAATGGGCAGCGTCCGCGGGGGAAAGCCCAAAGCGACGAGCGATTCGATGG	0	75	0	92	0	113	3	85	0	57	0	69	0	46	1	36	90	158	0	59	2	23	0	76	0	56	0	29	0	45	0	73	0	92	31	98	28	6	NA	NA	6	37	8	19	4	72	0
TP101881	TGCAGCAGGATAATTGCACTGAGCACAAACATTGACAATGGAAAAAGTGGAGGGGTGGGGGAAG	TGCAGCAGGATAATTGCACTGAGCACAAACATTGACAATGGAAAAAGGGGAGGGGTGGGGGAAG	0	60	1	112	0	111	62	182	0	86	0	78	0	70	0	90	0	312	0	87	0	141	0	115	0	98	22	63	28	48	0	89	0	95	20	97	11	50	30	124	0	88	0	55	0	91	0
TP102365	TGCAGCAGGCAAAAGCAGCTCTTATCACGGATGCATAAAACCACCAAAAATAGGGGGTGGGGGG	TGCAGCAGGCAAAAGCAGCTCTTATCACGGATGCATAAAACCACCAAAAATAGGGGATGGGGGG	3	28	NA	NA	0	36	0	54	0	48	0	51	0	24	0	26	0	53	3	34	2	52	0	54	0	24	5	18	0	47	0	38	NA	NA	15	33	18	21	17	17	NA	NA	NA	NA	0	36	NA
TP104053	TGCAGCAGGCGGAGGAGGACCTTTTGGCTGCGCTCCCGACCTTCGACGACGAGCAGGCCGACCC	TGCAGCAGGCGGAGGAGGACCTTTTGGCTGCGCTCCCGACCTTCGACGACGAGCAGGCCGACCA	233	7	175	5	63	1	152	4	141	3	171	4	73	0	53	2	273	4	129	1	202	4	141	2	149	4	98	3	65	2	55	0	58	1	252	6	96	2	136	0	72	5	96	5	109	4	53
TP105198	TGCAGCAGGGCGCGGCCCGCGAGTGGGCATTGGCAGGGGACAATCGCGGCATAACGCCCATTCA	TGCAGCAGGGCGCGGCCCGCGAGTGGGCATTGGCAGGGGACAATCGAGGCATAACGCCCATTCA	55	0	65	0	NA	NA	141	0	NA	NA	56	0	NA	NA	36	0	149	0	10	12	55	0	28	0	51	0	44	4	49	0	63	4	33	2	61	16	30	23	11	19	65	0	37	0	64	0	40
TP105428	TGCAGCAGGGGCAGTCGGACGGAGGGGGGAGAAGCATTTCAGGGGAGGGGAAAGGCAGCAGCAA	TGCAGCAGGGGCAGTCGGACGGAGGGGGGAGAAGCATTTCAGGGGAGGGCAAAGGCAGCAGCAA	49	7	65	0	91	0	61	3	41	0	60	0	32	0	NA	NA	108	0	77	0	58	22	91	0	67	0	35	20	66	2	51	5	75	8	86	14	57	3	52	20	30	0	20	0	67	0	24
TP107089	TGCAGCAGGTGGGAAGGAAAGTGGGCGGAACGGAAGGACAAAAGGACCGACTCATTAAGCAATA	TGCAGCAGGTGGGAAGGAAAGTGGACGGAACGGAAGGACAAAAGGACCGACTCATTAAGCAATA	11	77	20	25	12	46	49	30	38	50	4	54	0	36	30	17	1	98	39	40	66	51	16	75	1	97	13	33	55	19	5	79	11	85	2	85	31	49	33	66	10	58	4	24	0	74	0
TP107367	TGCAGCAGGTTCTTCAGCAGGTCCTTCAGCTCGTTGGAGAAATGTGACGGGAATTTGACCTGGA	TGCAGCAGGTTCTTCAGCAGGTCCTTCAGCTCGTTGGAGAAATGTGACGGGAATTTGACCTGAA	62	0	61	0	62	0	94	1	57	0	70	0	50	0	51	0	145	0	74	0	58	0	60	1	67	0	29	0	96	0	62	0	69	0	119	0	67	0	48	0	53	0	55	0	96	0	32
TP107771	TGCAGCAGTAGAGCAAATTTATACGGTTGTAATTCGTCCGCGTAGCCAAAAAGTGACGATTTGA	TGCAGCAGTAGAGCAAATTTATACGGTTGTAATTCGTACGCGTAGCCAAAAAGTGACGATTTGA	27	0	52	0	47	0	43	0	34	0	41	0	34	0	32	0	60	0	38	0	44	0	36	0	32	5	NA	NA	51	0	26	2	36	2	23	14	28	12	31	9	18	3	29	0	51	0	NA
TP108524	TGCAGCAGTGTGTGCCATCGTTTCCACAATTCCTTTCGTGGCGGTATTCCTTCCGTTGGACGTC	TGCAGCAGTGTGTGCCATCGTTTCCACAATTCCTTTCGTGGCGGCATTCCTTCCGTTGGACGTC	0	169	12	99	40	149	0	334	13	193	36	116	23	43	0	92	0	413	126	139	8	251	0	237	0	168	7	136	0	254	0	184	0	175	0	339	1	166	0	323	3	96	0	119	0	289	62
TP108543	TGCAGCAGTGTTCGGTTCGTTCGTTCCCTCCAATCGCTTCGACGGCGGTCCGTCCAATGTCAGT	TGCAGCAGTGTTCGGTTCGTTCGCTCCCTCCAATCGCTTCGACGGCGGTCCGTCCAATGTCAGT	22	63	9	68	21	71	84	152	27	68	13	102	14	19	0	69	0	178	0	101	39	122	0	67	4	80	42	29	19	102	14	65	13	101	67	79	24	59	106	19	7	63	13	62	27	62	5
TP108552	TGCAGCAGTGTTGCCCCACCGTCGGTCCGTTTTCGTTTTCTGTTCGTCTGTCAATGCGTCCGTC	TGCAGCAGTGTTGCCCCACCGTCGGTCCGTTTTCGTTTTCTGTTCGTCTGTCAATGCGTACGTC	65	0	68	0	161	0	153	59	164	0	109	0	64	0	34	0	320	0	169	0	121	7	82	0	87	0	89	0	73	56	112	0	128	0	118	0	152	0	116	0	117	0	47	3	129	0	60
TP108758	TGCAGCAGTTCCGCCGACGCTGGCGCTGCCCAAAATCCCGTCGATGCGTTTCGCTTTCGGCTGT	TGCAGCAGTTCCGCCGACGCTGGCGCTGCCCAAAATCCCGTCGATGCGTTTCGCTTTCGGCTGG	0	29	0	26	0	28	0	41	0	42	NA	NA	NA	NA	NA	NA	0	105	0	49	0	60	0	26	0	46	0	37	0	26	0	40	0	47	0	34	0	24	0	43	1	51	NA	NA	0	39	NA
TP108982	TGCAGCAGTTCGGCATCCCTCAGTTGAGAGGGCGGTTGCAGGTAGGTTAGGCGTCGGTGCTGTT	TGCAGCAGTTCGGCATCCCTCAGTTGAGAGGGCGGTTGCAGATAGGTTAGGCGTCGGTGCTGTT	59	31	NA	NA	101	2	115	12	44	4	60	0	29	0	29	0	180	0	22	0	47	21	65	0	61	4	16	29	42	31	107	0	52	3	12	33	2	56	0	82	26	19	NA	NA	63	0	50
TP109167	TGCAGCAGTTGAAGAATGCTTTTAGTCAACAGCAGCAGAAGCAGGCGAACGAACGGACTCTGAA	TGCAGCAGTTGAAGAATGCTTTTAGTCAACAGCAGCAGAAGCAGACGAACGAACGGACTCTGAA	35	26	7	46	0	76	0	91	2	86	11	57	7	14	0	58	7	143	1	74	17	67	5	89	0	73	0	45	0	85	0	44	19	44	0	90	0	69	0	85	0	32	1	34	0	71	5
TP109434	TGCAGCAGTTTGAATGGCAGCCGAACGTCCAAAAAGACGACGAATTTTTGCGCAAGCGCGTGGG	TGCAGCAGTTTGAATGGCAGCCGAACGTCCAAAAAGACGACGAATTTTTGCGCAAGCGCGTGGA	31	2	42	2	30	2	39	5	42	3	49	7	22	5	17	3	64	7	35	7	78	11	44	5	NA	NA	32	4	32	4	27	1	39	3	45	3	26	2	53	9	30	4	29	2	29	5	20
TP109658	TGCAGCATACTGTAACTGATAACGTCGGGAGAAGAAGTAAGCAGAGAAGAACGAGGCGAGGGGG	TGCAGCATACTGTAACTGATAACGTCGGGAGAAGAAGTAAGCAGAGAAGAACGAGGCGAGGGGC	67	7	71	7	177	11	90	9	88	5	62	9	40	4	81	5	212	14	112	2	164	5	106	7	104	18	31	2	128	9	48	3	66	4	139	11	116	8	95	4	90	5	55	2	111	9	95
TP109782	TGCAGCATATCTCCGATCAGAAGGAGTGGACGGGAGCATTCTCTCCCGTCTCATCATGGCCAAA	TGCAGCATATCTCCGATCAGAAGGAGTGGACGGGAGCATTCTCTCCCGCCTCATCATGGCCAAA	35	95	66	25	41	28	56	73	49	25	68	64	36	24	42	49	97	66	39	65	69	135	78	76	40	34	7	42	58	176	60	105	74	84	67	158	57	68	21	107	39	51	45	11	80	59	16
TP109804	TGCAGCATATGAAGGGCAAAGTTTTATTGTGAGAAAATTGGTGGACTGATTGATTTTTTGTGGA	TGCAGCATATGAAGGGCAAAGTTTTATTGTGAGAAAATTGGTGGACTGATTGATTTTTTGTGAA	81	0	112	1	99	2	102	0	38	0	67	1	25	0	43	0	145	0	88	1	86	0	51	0	87	0	NA	NA	74	0	50	0	66	0	55	0	55	0	47	1	40	0	27	0	58	0	79
TP110197	TGCAGCATCAGCAACAGCAGTCGCTGGCGACAGGCATTGGCATCGGCGGCGGCGGTGCCGTGCG	TGCAGCATCAGCAACAGCAGTCGCTGGCGACAGGCATTGGCATCGGCGGCGGCGGTGCCGTGCC	6	89	1	33	8	112	6	190	7	130	5	93	1	66	2	143	8	296	6	135	10	150	6	140	3	109	6	89	6	159	3	93	1	56	8	165	2	119	0	104	3	90	1	70	8	141	3
TP110422	TGCAGCATCAGCTCTTTGACGGACTGTGCCATGTGATGAACAATGCAATGCGCGATTACATTGG	TGCAGCATCAGCTCTTTGACGGACTGTGCCATGTGATGAACAACGCAATGCGCGATTACATTGG	NA	NA	0	37	NA	NA	0	49	0	40	0	29	NA	NA	0	31	0	81	0	37	0	40	0	69	0	26	0	21	0	55	0	33	0	26	0	29	0	49	0	24	0	29	0	42	0	49	0
TP111472	TGCAGCATCGCCGCCGCACACTCCAAAAATGTTTAAATGCGCCCGAGGGGACGGCGTAAGGACG	TGCAGCATCGCCGCCGCACACTCCAAAAATGTTTAAATGCGCCCGAGGGGACGGCGTAAGGACC	7	47	6	78	4	59	6	90	4	40	8	69	2	30	5	38	14	114	6	16	10	80	3	34	11	67	NA	NA	4	43	4	81	8	39	5	84	NA	NA	2	39	1	39	4	31	15	76	3
TP111892	TGCAGCATCGGCTGACCAAAATGAACAACCGCAAGAAACAGACACAAAGCCAAATGGACTTGGG	TGCAGCATCGGCTGACCAAAATGAACAACCGCAAGAAACAGACACAAAGCCAAACGGACTTGGG	1	49	1	45	0	48	0	108	0	55	0	40	2	24	0	39	0	109	0	45	0	94	3	69	0	49	0	39	0	81	6	44	0	47	27	64	33	3	22	4	3	28	0	37	0	55	0
TP114693	TGCAGCATGGGTGAAGCCGAAGTGGATGCGACAGAGGATGGCGGCGACGATGACATCGCCCACG	TGCAGCATGGGTGAAGCCGAAGTGGATGCGACAGAGGATGGCGGAGACGATGACATCGCCCACG	NA	NA	26	3	31	1	34	20	37	0	NA	NA	NA	NA	44	0	90	0	37	0	52	1	23	0	23	0	16	11	30	6	46	0	NA	NA	23	5	31	15	NA	NA	25	1	22	0	32	0	NA
TP115183	TGCAGCATGTCGTTTCCAACGCGAACAAAGAAGGGCTCATGATCAAAGGCTGCCGCCACAATGA	TGCAGCATGTCGTTTCCAACGCGAACAAAGAAGGGCTCATGATCAAAGGCCGCCGCCACAATGA	11	81	31	21	27	92	50	110	49	83	44	70	6	71	30	58	185	223	20	69	132	135	30	108	52	55	7	88	33	84	17	77	48	94	110	95	71	61	58	126	40	67	26	98	49	96	63
TP115484	TGCAGCATTAAAATGGTCATTCTACGCCAATTGGAACATAAATGTGAACTGTGAAAAGTGTAGT	TGCAGCATTAAAATGGTCATTCTACGCCAATTGGAACATAAATGTGAACTGTGAAAAGTGTAGG	NA	NA	0	33	1	32	0	72	0	35	0	28	NA	NA	NA	NA	0	55	0	37	0	44	0	24	0	24	NA	NA	0	48	0	25	1	24	0	45	0	35	0	44	NA	NA	0	21	0	25	NA
TP115560	TGCAGCATTACGCGGCGATGGGCCGCGATTTGTTGGGTGCGCGAGAGGTCAATTTGTTGCCGAA	TGCAGCATTACGCGGCGATGGGCCGCGATTTGTTGGGTACGCGAGAGGTCAATTTGTTGCCGAA	18	11	34	51	21	85	36	42	23	19	36	67	21	11	16	11	44	28	39	14	31	21	19	16	20	7	NA	NA	20	21	NA	NA	33	27	25	10	27	0	20	7	53	7	NA	NA	23	19	17
TP115954	TGCAGCATTGGCATTTACAGATAGAACCCCCAAACCAACGGCATGCTGTGCCAAACACTCCAAC	TGCAGCATTGGCATTTACAGATAGAACCCCCAAACCAAAGGCATGCTGTGCCAAACACTCCAAC	183	73	410	10	315	28	656	55	413	63	248	57	233	24	388	21	684	129	501	33	538	36	304	121	441	6	161	21	610	33	297	10	176	46	180	21	357	0	48	0	198	76	285	28	377	42	251
TP116039	TGCAGCGTTGTACACCAACAACACACAGATGGCGACTCAAAGTGAGTTTTGAAAGGAAGGGTTC	TGCAGCATTGTACACCAACAACACACAGATGGCGACTCAAAGTGAGTTTTGAAAGGAAGGGTTC	208	18	199	0	245	20	297	67	178	11	203	29	102	1	165	3	630	0	297	0	208	40	153	0	166	0	132	0	180	60	163	0	202	3	279	2	221	8	220	0	113	0	97	0	268	13	148
TP116063	TGCAGTATTGTGCTCCGTTTCAAAATGGTCGATGCTCCGCTGACTGTGCGGCGCTTTTTTGACC	TGCAGCATTGTGCTCCGTTTCAAAATGGTCGATGCTCCGCTGACTGTGCGGCGCTTTTTTGACC	0	128	10	94	0	148	0	152	7	160	0	161	4	120	10	101	35	326	0	118	15	168	0	125	0	178	8	84	0	146	18	35	35	72	0	140	0	125	0	128	0	76	21	70	0	154	18
TP116249	TGCAGCATTTGCGGGTTGGTCATCTGAGGGGAAGGAACAACGAAATGAGCTTGTTTGTCTTTAA	TGCAGCATTTGAGGGTTGGTCATCTGAGGGGAAGGAACAACGAAATGAGCTTGTTTGTCTTTAA	77	0	97	2	61	0	95	0	63	0	58	0	37	0	37	0	150	0	96	0	99	0	90	0	43	0	51	17	69	0	56	0	58	0	68	5	41	9	37	17	62	0	63	0	50	0	27
TP116311	TGCAGCATTTGGCCCTCGACCATTCCGCCTTCGATGTGCACGGAGGCGGCGAGCAGTTTTTGTG	TGCAGCATTTGGCCCTCGACCATTCCGCCTTCGATGTGCACGGAAGCGGCGAGCAGTTTTTGTG	1	26	0	38	0	43	0	64	0	42	0	45	NA	NA	NA	NA	0	129	0	21	0	47	0	43	1	27	4	27	0	41	5	45	0	40	28	37	5	26	5	28	0	41	NA	NA	0	72	NA
TP116319	TGCAGCATTTGGTTGATCAGAAGGGCCAATTCGGCGGAACGTGGCGATTGGAAAATGAAACGGT	TGCAGCATTTGGTTGATCAGAAGGGCCAATTCGGCGGAACGCGGCGATTGGAAAATGAAACGGT	0	31	6	33	14	26	0	42	7	38	9	36	8	13	0	43	0	43	37	4	0	71	0	45	0	27	0	44	0	42	0	44	0	30	0	37	0	27	0	46	NA	NA	4	20	0	67	NA
TP116332	TGCAGCATTTGTGCCGTGCCATTCCGCTCCGCATAGATCAGTTCGGCATCCACTCGCAGCCCCG	TGCAGCATTTGTGCCGTGCCATTCCGCTCCGCATAGATCAGTTCGGCATCCACTCGCAGCCCCC	4	125	10	236	8	150	14	229	7	212	5	146	4	74	5	91	16	380	9	139	14	206	11	144	6	133	1	133	2	186	6	172	4	163	7	189	7	144	8	194	9	173	1	58	5	167	3
TP116380	TGCAGCATTTTGCGTTGCTGTTGAGCGCTGAACCCGTGTCGCTTGCCCTCGTGCTGCTGCTGGA	TGCAGCATTTTGCGTTGCTGTTGAGCGCTGAACCCGTGTCGCTTGCCCTCGTGCTGCTGCTGAA	20	134	7	214	21	65	81	153	20	209	87	78	24	66	3	54	7	382	114	50	69	179	0	161	12	140	52	31	67	195	0	132	30	136	57	110	148	54	126	38	29	79	0	146	14	160	19
TP116421	TGCAGCATTTTTGGTGTTTCGCCGCGAATATCACCGAATTATCGTGGCGATGGGCGGGGGGAGG	TGCAGCATTTTTGGTGTTTCGCCGCGAATATCACCGAATTATCGTGGCGATGGGCGGGAGGAGG	25	0	NA	NA	42	0	67	0	26	0	49	0	NA	NA	50	0	124	0	40	0	94	1	44	0	23	0	22	0	45	0	38	0	37	0	67	0	36	0	45	0	45	0	NA	NA	44	0	31
TP116422	TGCAGCATTTTTGGTGTTTCGCCGCGAATATCACCGAATTATCGTGGCGATGGGCGGGGGGGAG	TGCAGCATTTTTGGTGTTTCGCCGCGAATATCACCGAATTATCGTGGCGATGGGCGGGGAGGAG	NA	NA	13	65	21	51	26	37	15	12	16	10	NA	NA	20	16	33	97	NA	NA	9	25	11	44	9	12	NA	NA	24	24	13	15	11	27	20	30	22	0	NA	NA	30	14	19	14	19	22	5
TP116467	TGCAGCCCAAACTTCAAACCAATCCTCAATGGATTCTTCTCAGGAAGCACACCCATGCTCATCC	TGCAGCCAAAACTTCAAACCAATCCTCAATGGATTCTTCTCAGGAAGCACACCCATGCTCATCC	117	89	76	114	89	81	266	77	111	128	141	99	85	20	94	80	181	136	188	47	161	38	100	95	92	60	51	16	179	65	117	66	82	109	137	73	68	34	29	20	111	43	64	52	167	114	70
TP116676	TGCAGCCAACAGCGAAGTGATCAGCAACAGAATTTGCCGCCATTCTTTGCCGCACAATTGGACG	TGCAGCCAACAGCGAAGTGATCAGCAACAGAATTTGCCACCATTCTTTGCCGCACAATTGGACG	31	32	NA	NA	57	32	50	24	36	19	21	24	13	10	47	0	59	67	0	32	59	52	9	44	34	15	29	8	58	6	27	47	16	19	22	11	18	7	NA	NA	6	14	21	22	24	47	15
TP117155	TGCAGCCAATCCGCCACCCACAGAACATGCAACGCCGACTGAAAAGGTCGTTGTTTTGTAAAAA	TGCAGCCAATCCGCCACCCACAGAACATGCAACGCCGACTGAAAAGATCGTTGTTTTGTAAAAA	0	68	0	59	0	49	15	41	10	59	2	56	0	27	0	42	2	131	10	46	9	65	0	53	0	50	10	19	30	45	0	58	4	53	13	79	18	59	19	53	5	29	0	39	0	60	13
TP118249	TGCAGCCACGCGGAACTCGTAGATTTGCTGCCGTTTGACGCTGGTCACCTTCAGTGATACCAAT	TGCAGCCACGCGGAACTCGTAGACTTGCTGCCGTTTGACGCTGGTCACCTTCAGTGATACCAAT	145	0	214	1	224	0	258	18	232	5	201	0	109	8	124	0	450	0	169	0	225	0	174	0	159	0	121	2	174	10	185	0	219	0	252	3	231	2	160	1	191	0	83	0	179	0	105
TP118322	TGCAGCCACGGCACTATGCCATCATTAACAAATTGCTCATTGTGCGGTAAGAGAAAAATAATTC	TGCAGCCACGGCACTATGCCATCATTAACAAATTGCTAATTGTGCGGTAAGAGAAAAATAATTC	62	0	47	0	70	0	111	6	88	0	85	0	20	0	83	6	181	0	70	0	119	12	70	8	27	0	63	0	93	3	53	0	86	0	112	0	74	0	57	0	36	0	39	1	63	9	32
TP118330	TGCAGCCACGGCAGAAGAACGGAAGAAGAATGCCAAGCGGAAATGGGAAGAGACGGTCAGCGTG	TGCAGCCACGGCAGAAGAACGGAAGAAGAATGCCAAGCGGAAATGGGAAGAGACGGTCAGAGTG	0	35	NA	NA	0	39	0	78	0	42	0	31	NA	NA	NA	NA	0	64	0	37	10	33	0	27	0	28	22	19	17	46	1	31	NA	NA	0	59	9	25	32	19	4	29	NA	NA	0	20	0
TP119905	TGCAGCCAGCGCTCTCCGAGGAATAGATTTTTAGAGTTTCTATATCGTGAAATGTAAACTGTAT	TGCAGCCAGCGCTCTCCGAGGAATAGATTTTCAGAGTTTCTATATCGTGAAATGTAAACTGTAT	15	58	34	10	3	54	0	71	13	48	3	57	29	29	13	18	23	113	15	10	24	40	0	57	4	35	0	22	0	23	0	58	0	37	0	83	NA	NA	0	34	0	61	22	33	10	65	3
TP120960	TGCAGCCAGTAGTCGCGTGATGGCCTGCGATTTAGCATCGAGTACAAAAGGGCCGCGGCGAGTG	TGCAGCCAGTAGTCGCGTGATGGCCTGCGACTTAGCATCGAGTACAAAAGGGCCGCGGCGAGTG	93	98	29	35	189	37	21	174	105	137	108	66	65	45	71	62	490	61	34	78	56	190	148	199	83	84	30	98	28	121	41	252	89	167	72	159	66	47	43	66	45	82	41	66	131	94	119
TP121550	TGCAGCCATCCAAGTGATGCCTGAACAAAAATTTTATTTTAGCAGCATACCAAATTTCTCACTT	TGCAGCCATCCAAGTGATGCCTGAACAAAAATTTTATTTTAGCAGCATACCAAATTTCTCACCT	12	85	19	29	43	154	45	105	42	81	45	112	9	42	11	74	20	305	NA	NA	54	81	26	159	6	84	13	39	26	103	51	142	30	78	38	73	44	65	17	77	32	50	4	57	19	70	15
TP121647	TGCAGCTATCGCATCAATTACGTGCCGTGAACCGTTGTCACAGCAAATGAACAGCATTCTGAAA	TGCAGCCATCGCATCAATTACGTGCCGTGAACCGTTGTCACAGCAAATGAACAGCATTCTGAAA	20	0	42	5	36	0	67	0	64	0	43	0	31	0	38	0	86	0	38	0	54	0	46	0	26	0	NA	NA	34	0	36	0	27	1	19	31	32	7	26	4	28	2	34	0	40	0	NA
TP121960	TGCAGCCATGGGCAACAATTCAGGTGCAAATGAATGGAACTGAATTCGTAAATTCAAAATGGTT	TGCAGCCATGGGCAACAATTCAGGTGCAAATGAATGGAACTGAATTCGTAAATTCAAAATGGGT	0	57	0	70	1	66	0	153	2	102	1	76	0	49	0	55	1	235	1	99	0	122	1	93	1	108	0	66	0	87	0	114	0	100	1	125	0	86	0	62	0	86	1	42	0	116	0
TP122360	TGCAGCCATTTGACTCATTTGTGGTGGACACCGAGGCGGTGGAGGAGGAGGCGGAGAACAGCGC	TGCAGCCATTTGACTCATTTGTGGTGGACACCGAGGCGGTGGAGGAGGAGGCGGAGAACAACGC	100	16	63	16	77	16	115	67	93	16	90	8	68	4	65	2	169	41	93	23	112	28	86	44	87	24	46	22	90	49	105	0	94	6	150	37	107	10	94	29	76	38	33	17	82	21	27
TP122732	TGCAGCCCACAATCACCCACCTATTTTTGGCCAACATGATGTGAATATTTTTTCCCCTCAAAAT	TGCAGCCCACAATCACCCACCTATTTTTGGCCAACATGATGTGAATATTTTTCCCCCTCAAAAT	39	27	27	48	63	27	53	49	32	27	45	66	20	29	20	28	57	55	25	24	44	23	38	21	28	24	14	18	48	46	35	26	35	24	73	35	35	10	52	1	37	27	20	21	55	32	15
TP123539	TGCAGCCCCAACAGCTTCTTTTGCGTATTTAATTTTCTTCTTCAGGTGTTTACAATTGGCCAAG	TGCAGCCCCAACAGCTTCCTTTGCGTATTTAATTTTCTTCTTCAGGTGTTTACAATTGGCCAAG	100	0	NA	NA	70	0	164	0	125	0	117	0	32	0	61	0	240	0	54	0	171	0	105	0	91	0	52	4	108	0	117	0	109	18	143	8	160	26	100	0	40	4	90	0	96	0	39
TP124360	TGCAGTCCCTCAAAATGCTCTTTTTGGTAATGGCTCAATTCCGCAATTATTTTCTCCTCCTTCT	TGCAGCCCCTCAAAATGCTCTTTTTGGTAATGGCTCAATTCCGCAATTATTTTCTCCTCCTTCT	0	79	NA	NA	0	67	16	116	3	49	0	83	0	44	5	55	0	146	10	81	19	129	0	61	2	44	12	39	14	72	0	25	0	63	49	87	25	61	48	46	1	31	0	37	0	113	0
TP125496	TGCAGCCCGAGGGCGGTGTTGGCGGAGTCGCCGCGGGGCAAAGCGGGGCGAAAACGCGCGACAC	TGCAGCCCGAGGGCGGCGTTGGCGGAGTCGCCGCGGGGCAAAGCGGGGCGAAAACGCGCGACAC	0	124	5	44	0	120	19	150	14	147	14	110	9	39	0	90	0	338	40	69	27	118	0	183	0	83	0	90	11	134	0	92	0	111	0	152	2	108	0	111	0	106	0	29	0	111	0
TP127426	TGCAGCCCTCTTTGCGACATCAATTTTTGAGTCTTTGGTTTCTTCAGCCTTGGCTTCTCTCTTT	TGCAGCCCTCTTTGCGACATCAATTTTTGAGTCTTTGGTTTCTTCAGCCTTGGCTTCTCTCTTC	52	45	23	10	59	30	34	61	20	34	43	43	4	32	30	24	125	63	50	35	89	40	13	30	39	35	50	45	46	36	39	43	42	52	32	46	48	51	24	40	22	24	20	21	50	64	29
TP127696	TGCAGCCCTTCCTACTATAGGTAGAGGCCTGGAATTTTTTTTGACTTTAGACAACACTTCAACT	TGCAGCCCTTACTACTATAGGTAGAGGCCTGGAATTTTTTTTGACTTTAGACAACACTTCAACT	63	0	NA	NA	68	0	115	0	78	4	71	0	42	1	36	1	136	2	76	0	120	0	87	1	61	1	51	0	85	0	67	1	53	1	110	0	54	0	68	0	45	2	33	1	44	0	55
TP127776	TGCAGCCCTTCCAAGTATAGGTAGAGGCCTGGAATTTTTTTGAAAATTAGAAAACACTTCAACT	TGCAGCCCTTCCAAGTATAGGAAGAGGCCTGGAATTTTTTTGAAAATTAGAAAACACTTCAACT	687	3	158	0	1031	2	1522	7	1178	13	1426	6	613	7	833	12	2391	18	1075	0	1276	25	1625	4	1378	24	522	1	1321	7	1044	20	798	3	1037	13	534	4	436	1	441	3	711	6	1758	23	696
TP127777	TGCAGCCCTTCCAAGTATAGGTAGAGGCCTGGAATTTTTTTGAAAATTAGAAACACTTCAACTT	TGCAGCCCTTCCAAGTATAGGAAGAGGCCTGGAATTTTTTTGAAAATTAGAAACACTTCAACTT	21	0	NA	NA	23	0	50	0	35	0	41	0	23	0	21	0	53	0	37	0	58	0	75	0	20	0	NA	NA	27	0	29	0	30	1	32	1	NA	NA	NA	NA	NA	NA	NA	NA	19	1	NA
TP127800	TGCAGCCCTTCCAAGTATAGGTAGAGGCCTGGAATTTTTTTTGATAATTAGAAAACACTTCAAC	TGCAGCCCTTCCAAGTATAGGTAGAGCCCTGGAATTTTTTTTGATAATTAGAAAACACTTCAAC	97	39	41	0	160	20	195	34	238	13	291	36	76	2	182	4	305	51	355	7	284	20	304	17	176	7	145	8	239	21	150	31	64	26	195	59	136	26	130	28	64	13	141	7	285	25	129
TP127853	TGCAGCCCTTCCAAGTATAGGTAGTGGCCTGGAATTTTTTTTTGAAAATTAGAAAACACTTCAA	TGCAGCCCTTCCAAGTATAGGTAGAGGCCTGGAATTTTTTTTTGAAAATTAGAAAACACTTCAA	1	129	1	30	3	225	4	234	2	284	12	232	1	102	10	198	10	452	18	291	7	282	15	318	6	153	1	126	5	220	3	169	0	140	1	210	1	141	0	103	0	122	3	133	17	298	1
TP127969	TGCAGCCCTTCCTACTATAGGTAGAGGCCTGGATTTTTTTTTTGACTTTTAGACAACACTTCAA	TGCAGCCCTTCCTACTATAGGTAGAGGCCTGGAATTTTTTTTTGACTTTTAGACAACACTTCAA	9	104	2	52	2	246	7	325	4	243	1	152	5	96	0	127	6	393	10	232	7	247	1	160	0	129	0	213	5	308	0	109	1	108	10	261	5	232	7	228	0	117	3	116	1	227	1
TP127994	TGCAGCCCTTCCTACTGTAGGTAGAGGCCTGGAATTTTTTTTGAAAATTAGAAAACACTTCAAC	TGCAGCCCTTCCTACTGTAGGTAGAGGCCTGGAATTTTTTTTAAAAATTAGAAAACACTTCAAC	22	0	NA	NA	70	18	20	0	65	0	55	0	26	0	24	0	57	0	128	11	136	0	60	0	50	0	49	0	74	0	45	0	25	0	39	2	20	6	54	0	22	0	46	0	69	0	24
TP128050	TGCAGCCCTTCGTATTATAGGTAGAGGCCTGGAATTTTTTTGAAAATTAGACAACACTTCAACT	TGCAGCCCTTCCTATTATAGGTAGAGGCCTGGAATTTTTTTGAAAATTAGACAACACTTCAACT	0	20	NA	NA	0	22	0	38	0	26	0	52	0	25	0	49	0	94	NA	NA	0	35	0	32	0	34	NA	NA	0	32	0	22	0	22	0	32	NA	NA	NA	NA	NA	NA	0	28	0	117	0
TP128055	TGCAGCCCTTCGTATTATAGGTAGAGGCCTGGAATTTTTTTTGAAAATTAGACAACACTTCAAC	TGCAGCCCTTCCTATTATAGGTAGAGGCCTGGAATTTTTTTTGAAAATTAGACAACACTTCAAC	0	100	0	37	0	154	0	80	0	187	0	286	0	138	0	209	0	512	0	76	0	211	0	115	0	147	0	84	0	180	0	135	0	131	0	175	0	102	0	59	0	93	0	95	0	184	0
TP128462	TGCAGCCGAACCCTGGTGGACACTTGGAATTTGCAATTTTTGGAGGAAAACACTAATTTTTCCC	TGCAGCCGAACCCTGGTGGACACTTGGAATTTGCAAATTTTGGAGGAAAACACTAATTTTTCCC	50	43	122	14	107	61	175	60	102	43	100	37	70	23	49	37	232	121	78	18	164	33	149	68	78	32	114	16	124	24	142	8	50	7	177	55	92	6	225	3	131	19	37	52	173	20	58
TP128541	TGCAGCCGAACGCTGTGCCACAACACGACGTTTTTGTTGCTGCTGGAGATTGTTGTGATGGTGG	TGCAGCCGAACGCTGTGCCACAACACGACGTTTTTGTTGCTGCTGGAGATTGTTGTGATAGTGG	111	0	24	0	34	0	88	10	64	0	30	0	32	0	39	0	52	0	67	0	83	6	87	0	90	0	55	0	53	0	105	0	52	0	120	0	48	32	33	0	NA	NA	25	0	46	0	35
TP128735	TGCAGCCGAAGTTCACTGTCGTCGATGCCGTTCACCCAATGCTCGCCGATGGAATTTGACAACG	TGCAGCCGAAGTTCACTGTCGTCAATGCCGTTCACCCAATGCTCGCCGATGGAATTTGACAACG	0	33	NA	NA	2	25	0	65	23	23	1	24	10	21	7	15	7	60	14	19	1	35	7	46	8	24	11	21	2	51	32	3	1	25	13	41	12	35	0	24	NA	NA	NA	NA	0	31	13
TP128840	TGCAGCCGACATGAGGCGAACATATAATTATCAGAAATGGAAGCATCAGGAAGAGGCAAAATGA	TGCAGCCGACATGAGGCGAACATATAATTATCAGAAACGGAAGCATCAGGAAGAGGCAAAATGA	0	32	0	48	0	74	8	149	0	60	0	91	0	21	0	72	1	116	0	39	1	79	0	65	0	49	0	22	3	88	0	70	0	65	0	65	0	47	0	56	0	32	0	37	0	68	3
TP129123	TGCAGCTGACGGAGCAGGCGCTGGCGGTTCCGCTACGGGTGCCAGCGGTGGTGCTGACCAATGG	TGCAGCCGACGGAGCAGGCGCTGGCGGTTCCGCTACGGGTGCCAGCGGTGGTGCTGACCAATGG	31	0	83	0	36	28	48	25	58	6	26	6	23	8	28	0	74	39	73	1	35	44	68	0	60	0	4	24	68	12	52	0	15	7	63	13	28	15	36	0	35	0	NA	NA	68	8	27
TP129203	TGCAGCCGACTGTCCTCCTCACACTGGGCACATTTCACAAACGCCGCCTGATTTGGTTAACGGG	TGCAGCCGACTGTCCTCCTCACACTGGGCACATTTCACAAACGCCGCCTGATTTGGTTAACGGA	110	0	24	0	100	0	103	0	141	0	97	0	58	0	55	0	245	0	97	0	154	0	82	0	76	0	40	1	91	1	52	0	66	0	132	2	63	0	78	0	23	0	54	0	102	0	29
TP130036	TGCAGCCGATGGAATTTGAAATGGGCATAAATGGGGTAAATTCAGTCATTCTACTGATTCATTG	TGCAGCCGATGGAATTTGAAATGGGCATAAATGGGATAAATTCAGTCATTCTACTGATTCATTG	32	25	29	32	41	16	53	60	50	42	48	29	10	26	18	54	117	9	33	48	53	50	37	12	31	34	35	25	33	50	30	16	14	62	8	82	6	78	6	76	46	22	31	26	26	73	8
TP130061	TGCAGCCGATGGCCAGCAAACGCCGCCGCCATTGAGTGCTGATCGTCGCGCAGCAGTGGAGCGT	TGCAGCCGATGGCCAACAAACGCCGCCGCCATTGAGTGCTGATCGTCGCGCAGCAGTGGAGCGT	45	16	97	0	93	12	108	0	92	10	63	3	26	0	28	0	168	0	40	0	73	18	105	0	57	3	86	0	169	0	64	0	66	0	70	0	26	16	89	0	55	0	38	0	46	1	47
TP130463	TGCAGCCGCACCGTCCAGCTACGGCTCGGCCTCCGAGGCCCAGCCTGCCCCAGCAGGCGACGAA	TGCAGCCGCACCGTCCAGCTACAGCTCGGCCTCCGAGGCCCAGCCTGCCCCAGCAGGCGACGAA	27	19	13	7	62	67	81	56	41	10	77	0	34	19	32	10	133	6	39	42	69	38	64	25	39	10	32	6	74	34	50	5	17	50	68	29	55	20	52	4	9	49	43	3	40	61	49
TP134261	TGCAGCCGCTGCCCCCGCGGCATTGTTGAAAAGTGATGCCGTCCTCCCTCTGATTGACCCGTGC	TGCAGCCGCTGCCCCCGCAGCATTGTTGAAAAGTGATGCCGTCCTCCCTCTGATTGACCCGTGC	62	0	27	0	122	0	108	19	88	0	104	0	54	0	70	0	268	0	94	0	98	7	153	0	122	0	85	0	101	17	70	0	108	0	135	0	114	0	60	0	60	0	61	0	124	4	79
TP135417	TGCAGCCGTCGATGGGCAGTGCTGCGGCCGCCGTCGCCGCTAACCAAGCGGCGGCAGCTCAAAT	TGCAGCCGTCGATGGGCAGTGCTGCGGCCGCCGTCGCCGCTAACCAAGCGGCGGCAGCTCAAAA	85	1	87	5	116	3	183	5	112	2	144	4	52	0	49	3	224	11	106	6	150	6	100	1	82	6	108	5	122	4	118	2	113	1	144	8	147	11	106	9	138	0	62	3	101	4	74
TP135627	TGCAGCCGTGACGGACTCACGGCGATCACTTGCGACTCGCCGTCATTTTCCGCTGACAGTCGCC	TGCAGCCGTGACGGACTCACGGCGATCACTTGCGACTCGCCGTCATTTTCCGCTGACAGTCACC	62	2	102	3	89	0	119	0	89	0	40	0	NA	NA	50	0	188	0	82	0	98	0	74	0	43	0	26	5	76	0	28	0	61	0	32	31	19	42	0	28	67	0	31	0	102	0	42
TP136532	TGCAGCCTAATAGAGAACACTTAGGGCTTTTGGTTGATACCAACAATATTAGATTTGGTTGACA	TGCAGCCTAATAGAGAACACTTAGGGCTTTCGGTTGATACCAACAATATTAGATTTGGTTGACA	NA	NA	25	0	18	5	51	33	58	4	36	0	28	1	40	0	91	0	21	3	47	1	54	5	NA	NA	NA	NA	38	27	NA	NA	40	0	17	13	6	32	53	14	37	5	38	0	27	1	21
TP136661	TGCAGCCTATTGGCACTGCGGGACCCCCTCTTCCTCAAAATTTTGATGGAAAATAGAGCAAAAA	TGCAGCCTATTGGCACTGCGGGACCCCCTCTTCCTCAAAATGTTGATGGAAAATAGAGCAAAAA	12	17	28	5	13	12	44	10	34	5	NA	NA	19	4	17	8	23	33	27	22	33	34	NA	NA	NA	NA	17	15	NA	NA	NA	NA	22	20	25	8	16	8	24	11	27	11	NA	NA	17	24	10
TP136679	TGCAGCCTCAAATGTTCGTAATCGGCCCAAAAGTTGTCGGAAAAGCTTGTTTTCCTCGGCCGTT	TGCAGCCTCAAATGTTCGTAATCGGCCCAAAAGTTGTCGGAAAAGCTTGTTTTCCTCGGCCGTA	1	35	2	94	2	108	2	224	2	147	0	65	2	43	1	31	5	166	2	138	4	151	3	132	5	112	5	100	14	142	NA	NA	6	99	1	174	13	256	4	133	1	60	3	39	3	103	2
TP136916	TGCAGCCTCCCTGATTAAGAGGGTTTTCTTGATCGATGACACGAATTAATTTTTAGACACACGG	TGCAGCCTCCCTGATTAAGAGGGTTTTCTTGATCGATGACACGAATTAATTTTTAGACACACGC	81	0	89	0	117	0	59	0	119	0	91	0	50	2	43	1	194	0	69	1	48	0	84	0	52	0	21	0	73	0	76	1	63	0	52	0	NA	NA	NA	NA	49	0	23	0	98	0	76
TP137577	TGCAGCCTGCAAATCGTTTAGAGACTTCTCAAGCGTGCCGAGTTTTGGCCCATCCCTTTCGCCA	TGCAGCCTGCAAATCGTTTAGAGACTTCTCAAGCGTGCCGAGTTTTGGCCAATCCCTTTCGCCA	99	0	93	12	81	16	159	15	84	21	96	27	48	18	57	8	189	23	107	28	114	8	24	9	44	31	69	26	116	15	61	0	85	5	97	22	102	5	122	6	59	5	55	17	103	23	40
TP138519	TGCAGCCTTACGCATTACAATTAGCTAACAATTTGCATATTTAAACTCTGCTTACATTTAAAAT	TGCAGCCTTACGCATTACAATTAGCTAACAATTTGCATATTTAAACTCTGCTTACATTTAAAAA	46	7	NA	NA	86	12	132	21	46	10	69	9	18	2	75	12	136	26	72	13	58	12	39	2	36	2	44	5	70	9	16	5	25	4	41	4	NA	NA	NA	NA	56	7	NA	NA	60	12	37
TP138619	TGCAGCCTTCCATTGTAGTATAATTTTCAAAATGTAGTTTGTTTGACACATTCGGCAATTCAGG	TGCAGCCTTCCATTGTAGTATAATTTTCAAAATGAAGTTTGTTTGACACATTCGGCAATTCAGG	25	0	32	1	86	0	168	0	105	1	36	0	40	0	69	0	112	4	36	0	92	6	44	0	82	0	36	6	85	0	137	0	54	0	79	0	40	8	20	0	56	0	78	0	93	0	50
TP138751	TGCAGCCTTCGGGGCGGGCATCGTAAGTTTTTTTTTGTTGTTTTTCGGTCCAAATTTTACATCT	TGCAGCCTTCGGGGCGGGAATCGTAAGTTTTTTTTTGTTGTTTTTCGGTCCAAATTTTACATCT	1	70	0	41	0	98	0	101	9	69	0	56	NA	NA	0	61	25	82	4	57	0	106	0	114	0	78	1	43	0	83	0	84	0	63	2	108	0	76	0	82	1	36	3	44	5	58	1
TP139421	TGCAGCGAAATGCCGTCATTTTCTACGATTATTTGGACAGTAACCAATTTGTCTGTATGTTGAA	TGCAGCGAAATGCCGTCACTTTCTACGATTATTTGGACAGTAACCAATTTGTCTGTATGTTGAA	0	32	0	39	0	35	0	58	0	26	0	24	6	20	NA	NA	0	82	27	17	0	50	0	33	0	24	0	55	0	40	0	26	NA	NA	8	17	2	27	11	11	0	28	NA	NA	0	36	0
TP139736	TGCAGCGAACGCTTCCATGAAAAGACACCCGCAGCCAAACTTCGACACAATCGAAGTGCTCGAG	TGCAGCGAACGCTTCCAAGAAAAGACACCCGCAGCCAAACTTCGACACAATCGAAGTGCTCGAG	72	2	7	30	43	14	75	13	81	29	69	38	21	9	26	34	171	13	0	80	59	62	28	95	29	22	47	19	52	36	39	39	50	30	82	41	26	55	30	30	48	7	3	24	71	0	55
TP139850	TGCAGCGAAGAACGGAAGAGGACGGGCGGACCGCGAGAGCAGTGGAAGATGGAAAACGGCGGAA	TGCAGCGAAGAACGGAAGAGGACGGGCGGACCGCGAGAGCAGTGGAAGACGGAAAACGGCGGAA	0	110	0	94	0	117	7	115	0	130	0	130	0	50	0	54	0	327	0	160	42	156	0	153	0	90	43	65	1	111	0	107	0	0	0	173	10	123	16	105	0	54	0	78	0	102	0
TP139870	TGCAGCGAAGACCAAATCAAGCAGTTGATTCAAATCACACGTGGCAAATTTGACATCGATGAAC	TGCAGCGAAGACCAAATCAAGCAGTTGATTCAAATCACACGTGGAAAATTTGACATCGATGAAC	35	6	97	3	85	0	181	1	91	0	76	13	55	2	57	0	211	0	111	10	128	19	97	9	51	0	83	0	129	2	51	0	NA	NA	73	0	87	0	63	0	42	7	57	10	112	2	62
TP141815	TGCAGCGACGATGGGAATGGAAACTGATCAACTTAAGCCTAAACCAAAACCGATACAGCACCAG	TGCAGCGACGATGGGAATGGAAACTGATCAACTTAAGCCTAAACCAAAACCGATACAGCACAAG	45	8	6	20	105	9	157	7	53	17	73	0	46	24	21	6	122	24	126	18	99	91	135	0	7	84	36	12	92	2	20	54	68	23	52	1	88	0	97	0	37	9	40	5	57	31	26
TP142758	TGCAGCGACTGCGCATGCCATGACTTGCTCTCCAAATCCAATTTGTTCCCAGGTGGAGTTGCTG	TGCAGCGACTGCGCATGCCATGACTCGCTCTCCAAATCCAATTTGTTCCCAGGTGGAGTTGCTG	0	29	NA	NA	3	48	18	53	3	72	10	26	6	28	10	22	15	60	7	37	6	69	0	55	15	22	8	52	10	66	NA	NA	NA	NA	13	52	5	45	7	28	NA	NA	4	21	13	25	NA
TP145994	TGCAGCGATGCAAAGCGAATGACTTGCAGAAGAAGCAGCACAAGGAGGGCAACGCACCGTTTGT	TGCAGCGATGCAAAGCGAATGACTTGCAAAAGAAGCAGCACAAGGAGGGCAACGCACCGTTTGT	40	0	0	0	41	0	64	0	45	2	30	29	NA	NA	34	0	104	5	36	14	37	0	63	0	34	0	39	7	31	6	8	23	32	0	55	0	33	21	24	0	62	0	18	7	35	8	NA
TP146577	TGCAGCGATTGGAGCGGCGGTGGGGGCGCCAACTGAAGTCGAAACAAAAATCATTTCCAAAAAT	TGCAGCGATTGGAGCGGCGGTGGGGGCGCCAACTGAAGTCGAAACAAAAATCATTTCCAAAAAA	3	31	NA	NA	NA	NA	4	84	1	50	1	50	0	20	2	21	1	90	0	25	9	62	5	47	1	43	1	30	2	59	2	32	0	21	1	60	0	35	1	31	0	36	1	28	1	35	NA
TP146629	TGCAGCGATTTAAGCCGTGCCGATTTGCGCCACCTCTTCGGTTCAGGCACTTCTCTATCTTTTA	TGCAGCGATTTAAGCCGTGCCGATTTGCGCCACCTCTTCGGTTCAGGCAATTCTCTATCTTTTA	41	35	8	25	20	79	60	55	13	79	7	126	15	32	29	63	83	31	18	53	51	34	16	74	10	30	65	13	52	70	38	24	11	98	48	38	67	10	123	0	9	43	14	8	57	60	39
TP147720	TGCAGCGCAATAGGCCGCAGACAACAAAAGTAAAATGGGACAACATTCATAAAAAAAGGTTGGC	TGCAGCGCAATAGGCCGCAGACAACAAAAGTAAAATGGGACAACATTCATAAAAAAAAGTTGGC	103	1	101	2	64	2	527	13	141	4	105	0	21	2	224	3	918	14	NA	NA	217	4	123	2	28	0	107	0	416	10	354	9	107	2	43	2	293	9	NA	NA	51	0	315	7	542	13	NA
TP147721	TGCAGCGCAATAGGCCGCAGACAACAAAAGTAAAATGGGACAACATTCATAAAAAAGGTTGGCC	TGCAGCGCAATAGGCCGCAGACAACAAAAGTAAAATGGGACAACATTCATAAAAAAAGTTGGCC	172	4	102	2	103	1	703	20	235	6	137	6	46	0	336	6	1112	31	NA	NA	288	2	196	3	28	0	185	2	426	9	548	17	132	2	66	3	380	9	NA	NA	61	1	350	12	457	14	NA
TP148332	TGCAGCGCACGACGGACCAACCCGCGGTCAATGAGACGGGCAAACTGCTCCAGCTGGCGGCCCA	TGCAGCGCACGACGGACCAACCCGCGGTCAATGAGACGGGCAAACTGCTCCAGCTGGCGGCCAA	0	80	1	49	0	76	0	104	1	108	0	78	1	29	0	61	1	175	0	85	1	85	0	139	0	47	2	61	0	48	0	80	1	66	1	150	0	93	1	145	2	73	0	57	0	71	0
TP149135	TGCAGCGCAGCGCCAGGCGCGGCATCGTCGACCAAATTGTGGCGTCATCGATCGTGATCGCTCG	TGCAGCGCAGCGCCAGGCGCGACATCGTCGACCAAATTGTGGCGTCATCGATCGTGATCGCTCG	0	50	0	67	1	38	1	56	1	29	1	43	0	35	NA	NA	1	113	1	77	1	53	2	48	0	24	0	28	0	49	NA	NA	0	40	0	52	0	60	0	23	0	23	1	31	0	55	0
TP150641	TGCAGCGGATGGCGCTCGTGCTCAACGGCAGACAATGCTTCTCCCATGGCCAAGTGTACGTCGC	TGCAGCGCATGGCGCTCGTGCTCAACGGCAGACAATGCTTCTCCCATGGCCAAGTGTACGTCGC	39	0	NA	NA	64	0	131	45	74	4	115	0	47	0	54	0	169	19	105	0	130	192	92	0	105	0	22	89	62	27	78	0	NA	NA	21	0	NA	NA	NA	NA	90	6	36	0	102	0	33
TP150749	TGCAGCGCATGTGTCACCACCAACACGGCCAAATTGACCAATTTTTGGGCCCAATGCTTCAGCG	TGCAGCGCATGTGTCACCACCAACACGGCCAAATTGACCAAATTTTGGGCCCAATGCTTCAGCG	61	0	68	1	74	1	133	15	90	6	69	0	34	0	28	0	158	0	56	0	141	11	76	0	69	0	52	12	78	40	59	0	67	1	91	21	74	57	83	37	66	18	23	0	75	0	38
TP153054	TGCAGTGCCCAGCAGAATTTGCGTATAAAAGGCTCACATTTTGATGACTCCTGCCATTTGTTTT	TGCAGCGCCCAGCAGAATTTGCGTATAAAAGGCTCACATTTTGATGACTCCTGCCATTTGTTTT	131	0	236	10	216	6	280	0	198	1	181	9	119	0	137	0	519	0	217	0	235	15	246	0	128	2	136	0	244	0	166	0	187	0	272	0	177	0	166	0	193	0	113	0	145	16	128
TP155204	TGCAGCGCCGTCTGCTCGGAAAATGCTTCCAATCCGAGAAGAATGCCGTTGAGAATTGAGCAAG	TGCAGCGCCGTCTGCTCGGAAAATGCTTCCAATCCGAGAAGAATGCCGTTGAGAATTGAGCAAA	97	2	85	1	170	3	218	6	145	4	162	3	106	0	135	3	292	6	118	1	203	2	119	2	127	1	102	1	223	3	97	2	169	4	133	0	130	2	114	1	61	1	84	0	193	3	74
TP161881	TGCAGCGCGCGAAAACGACGAGTTGAGGAAGGTCAGTGAGTGGCAGACGCTGCACGGCACATGG	TGCAGCGCGCGAAAACGACGAGTTGAGGAAGGTCAGTGAGTGGCAGACGCTGCACGGCACATGA	59	0	97	0	101	0	113	1	94	0	92	0	52	0	46	0	112	0	81	0	142	0	87	0	87	0	56	0	106	1	57	0	75	0	120	0	102	0	97	0	48	0	49	0	91	1	66
TP164305	TGCAGCGCGGCGTGCTGCTTGGAGCAGCTGGGATGGTCGACGGGGAAGTCGGCAATTTTGCGAT	TGCAGCGCGGCGTGCTGCTTGGAGCAGCTGGGATGGTCGACGGGAAAGTCGGCAATTTTGCGAT	0	36	0	65	0	64	0	59	14	62	0	54	0	32	0	38	0	77	0	46	2	90	0	48	3	43	0	50	0	71	6	40	1	31	35	92	18	25	5	41	0	38	1	29	5	46	0
TP165252	TGCAGCGCGTAGAAAAGGCAGTAGTGGTTGTCGTTATTGCGAATTTTAATCAGGCATTGGTCAT	TGCAGCGCGTAGAAAAGGCAGAAGTGGTTGTCGTTATTGCGAATTTTAATCAGGCATTGGTCAT	43	5	68	3	57	0	14	50	90	5	49	0	35	3	28	0	40	0	0	0	36	62	63	0	62	1	30	34	9	24	99	1	33	71	16	56	7	91	0	129	16	12	NA	NA	70	0	NA
TP165406	TGCAGCGCGTCAGGCAGCACAATGCTGTTGGTCTCCCCGCGGGTGGTGCCGTGCCGTGGCAGTC	TGCAGCGCGTCAGGCAGCACAATGCCGTTGGTCTCCCCGCGGGTGGTGCCGTGCCGTGGCAGTC	0	41	NA	NA	0	52	12	62	0	47	0	74	0	39	NA	NA	0	134	0	61	5	59	0	57	0	48	0	57	10	63	0	40	0	40	0	69	0	25	0	23	NA	NA	0	32	0	41	0
TP167478	TGCAGCGCTCGCCGTCCCTCCTCCGACAACGCCCATTTGCTTTGTCGGTGCGTATTGTGGCGTT	TGCAGCGCTCGCCGTCCCTCCTCCGACAACGCCCATTTGCTTTGTCGGTGCATATTGTGGCGTT	NA	NA	43	11	64	0	96	0	35	7	64	0	NA	NA	40	9	111	0	64	0	59	0	52	0	NA	NA	25	3	67	0	38	0	49	0	61	0	41	0	NA	NA	41	0	20	0	36	0	NA
TP169395	TGCAGCGCTTTTCCAAGAAGGTTTTGTTCAAATTGTTGAATGTTTTCTTGCCAGGAAAGCTCAA	TGCAGCGCTTTTCCAAAAAGGTTTTGTTCAAATTGTTGAATGTTTTCTTGCCAGGAAAGCTCAA	8	45	NA	NA	16	23	55	35	11	23	33	16	NA	NA	8	27	26	80	14	19	44	7	9	40	6	33	28	10	64	15	25	1	35	6	17	39	19	23	5	32	17	8	17	13	47	23	16
TP170247	TGCAGCGGAGACAGCGACACGTTCTGTTTCGTATTTTCAACAGAGAATCTCCTTGTTGCGCGTG	TGCAGCGGAGACAGCGACACGTTCTGTTTCGTATTTTCAACAGAAAATCTCCTTGTTGCGCGTG	59	12	86	0	92	1	111	27	116	2	76	22	48	0	55	0	164	0	42	18	39	57	74	22	92	18	NA	NA	74	48	60	4	0	0	98	51	72	17	29	85	39	7	52	0	98	13	66
TP171010	TGCAGCGGATGGCGCTCGTACTCAACGGCCGTCAATGCTTTTCGCATGGCCAAGTGTACGTCGC	TGCAGCGGATGGCGCTCGTACTCAACGGCCGACAATGCTTTTCGCATGGCCAAGTGTACGTCGC	23	111	1	48	46	55	86	196	75	55	99	132	41	30	67	20	324	231	11	60	167	128	37	148	29	10	102	80	85	90	41	18	5	33	270	103	238	92	260	132	69	69	44	29	57	72	39
TP171329	TGCAGCGGCAAGAATAAGACAAAACGAATGGTGAAGAAATAATTAGAAAAGGCCAAAGTGAGGA	TGCAGCGGCAAGAATAAGACAAAACGAATGGTGAAGAAATAATTAGAAAAGGCCAAAGTAAGGA	88	10	106	0	89	15	165	0	113	3	101	0	44	0	63	0	207	11	94	27	155	0	98	10	73	0	33	0	109	0	105	0	NA	NA	155	0	76	0	120	0	34	0	38	0	129	0	53
TP171429	TGCAGCGGCACACCAACTACGGCATCGACGACATTTGCACATTTTGCCAAAACTCCAAAAAATC	TGCAGCGGCACACCAACTACGGCAGCGACGACATTTGCACATTTTGCCAAAACTCCAAAAAATC	0	85	NA	NA	0	28	11	65	0	39	0	21	NA	NA	NA	NA	0	43	15	50	35	57	0	38	0	25	17	24	30	40	0	99	NA	NA	40	20	23	11	20	4	0	25	NA	NA	0	60	NA
TP173057	TGCAGCGGCCGCTGCTGCGGCGGTGATCATGCGCACCAGCTCGTCGGTCCGCTTCGATTCCACG	TGCAGCGGCCGCTGCTGCGGCGGTAATCATGCGCACCAGCTCGTCGGTCCGCTTCGATTCCACG	9	59	NA	NA	NA	NA	65	32	56	44	8	33	11	37	NA	NA	1	29	21	40	5	79	18	54	23	19	1	35	10	36	11	16	24	72	10	57	1	90	0	30	10	29	NA	NA	20	0	25
TP174163	TGCAGCGGCGGCAGCCGCAGCGGCAGAAGCAGCAGGCGGTGGTGCCGTAACAGTGATGGACCAT	TGCAGCGGCGGCAGCCGCAGCGGCAGAAGCAGCAGGAGGTGGTGCCGTAACAGTGATGGACCAT	77	0	19	10	90	4	114	0	46	22	99	15	NA	NA	28	19	134	28	73	0	62	18	24	40	46	6	NA	NA	87	0	75	4	31	4	74	11	61	5	48	0	64	6	30	0	59	28	74
TP174382	TGCAGCGGCGGGGGTGGGCCATGTTAATTAATGGTCAGTGGATTGGCTGCTGTACCCACCATGG	TGCAGCGGCGGGGGTGGGCCATGTTAATTAATGGTCAGTGGATTGGCTGCTGTACCCACCATCG	0	49	0	53	0	46	0	94	0	62	0	80	0	32	0	49	0	140	0	72	0	66	0	68	0	60	0	34	0	84	0	44	NA	NA	0	59	0	73	0	51	0	81	0	25	0	54	0
TP174400	TGCAGCGGCGGTAATCATGCGCGCCAGCTCATCGGTCCGCTTCGATTCCACGTCCATGGAGCGC	TGCAGCGGCGGTAATCATGCGCACCAGCTCATCGGTCCGCTTCGATTCCACGTCCATGGAGCGC	25	0	21	0	36	0	112	0	48	0	NA	NA	NA	NA	33	0	22	0	48	0	41	0	34	0	45	0	36	10	112	0	56	0	52	3	102	6	47	3	22	8	38	14	32	0	46	0	27
TP176408	TGCAGCGGGAGCCTAAACGAATTTGGAAAGTGCCAAAAAAAGAGCCATCCTCAAAGTGATGACA	TGCAGCGGGAGCCTAAACGAATTTGGAAAGTGCCAAAAAAAGAGCCATCCTCAAAATGATGACA	42	0	NA	NA	51	2	40	24	36	5	40	0	28	0	NA	NA	93	0	39	0	27	33	33	0	NA	NA	10	11	15	9	23	2	0	0	45	1	49	2	24	6	30	6	17	4	21	5	30
TP178266	TGCAGCGGTCCGCCCTCAATTTTGTGACACAGCAGGCAGCGGCCCGCCTCATTTGTATTTGTAG	TGCAGCGGTCCGCCCTCAATTTTGTGACACAGCAGGCAGCGGCCCACCTCATTTGTATTTGTAG	9	88	13	86	7	77	22	60	3	97	0	108	0	36	8	67	15	110	0	86	14	79	0	107	5	113	39	32	2	66	1	79	19	29	62	89	57	2	59	7	20	70	10	55	27	61	0
TP178548	TGCAGCGGTGGAAGAAGCGCTATTTTTGTTATGATAGAAACAAAGTGAGCACAGAGCAATGAAT	TGCAGCGGTGGAAGAAGCGCTATTTTTGTTATGATAGAAACAAAGTGAGCACAGAGCAATGAAA	45	2	NA	NA	65	3	88	2	57	1	33	0	21	2	44	0	41	2	71	4	50	1	55	0	56	1	43	0	39	0	53	1	NA	NA	60	1	48	3	53	2	48	2	24	0	72	2	27
TP178558	TGCAGCGGTGGAGGCGGCGGCGGAGGAGGGCACGGCGGATGCTGTGGAGGAAGTGGAGGCGGTG	TGCAGCGGTGGAGGCGGCAGCGGAGGAGGGCACGGCGGATGCTGTGGAGGAAGTGGAGGCGGTG	105	0	33	0	107	0	144	0	107	0	120	0	108	0	88	0	108	0	134	0	209	0	125	0	96	0	79	24	129	0	85	7	NA	NA	168	19	71	40	79	15	50	0	74	0	205	0	119
TP178623	TGCAGCGGTGGCTGCGCGGACAGCGGTGCGTGAGGCCATAGGGGTGCTTTCGCGCCCAATACGG	TGCAGCGGTGGCTGCGCGGACAGCGGTGCATGAGGCCATAGGGGTGCTTTCGCGCCCAATACGG	72	1	42	0	114	4	96	2	77	0	84	1	59	1	52	1	156	0	75	0	131	0	144	5	129	0	117	1	70	5	84	2	NA	NA	112	0	97	1	40	0	123	6	30	0	67	10	61
TP178834	TGCAGCGGTTCGATCGGCATCAATGGGCATCACGAAACCGCCTCTTCTCCTTTCAATTAACTTT	TGCAGCGGTTCGATCGGCATCAATGGGCATCACGAAACCGCCTCTTCTCCGTTCAATTAACTTT	41	219	51	220	126	300	105	420	42	337	38	313	27	222	60	265	216	553	19	421	54	524	28	263	104	276	26	241	39	375	78	397	47	135	76	408	8	417	39	235	66	120	14	228	91	309	55
TP178975	TGCAGCGGTTGGCGTTGGTCTTGTTGATCAACGGGCGCCACAAGCCCAACAACAAGTACGTTTG	TGCAGCGGTTGGCGTTGGTCTTGTTGATCAACGGGCGCCACAAGCCAAACAACAAGTACGTTTG	70	6	36	5	44	0	38	13	70	21	59	24	34	0	39	1	118	2	82	0	59	20	79	0	49	0	41	8	64	9	80	0	NA	NA	79	3	25	34	13	33	45	0	40	0	73	0	37
TP178993	TGCAGCGGTTGGGTTACGCGACTGAGGAGGACACCATCACGGAAAAGGTGACCATTGACTAACA	TGCAGCGGTTGGGTTACGCGACGGAGGAGGACACCATCACGGAAAAGGTGACCATTGACTAACA	25	81	1	32	6	75	33	110	22	69	0	49	0	54	4	35	2	136	29	35	2	90	0	62	4	59	14	38	4	100	8	46	46	8	69	27	45	47	66	30	21	26	16	61	3	66	6
TP181514	TGCAGCGTCGGCAGCGCCAACAGATGATGATGGGTTCGGGCGGAGGAGCGGCGGCGCTTCTGCC	TGCAGCGTCGGCAGCGCCAACAGATGATGATGGGCTCGGGCGGAGGAGCGGCGGCGCTTCTGCC	0	33	0	25	0	35	0	39	0	49	0	26	0	23	0	37	0	91	0	31	0	49	0	37	3	19	NA	NA	0	41	0	21	0	49	12	28	13	23	36	31	5	29	NA	NA	0	61	0
TP181723	TGCAGCGTCGTCCGCTGCACATGTCACCGCAACATCGCTTGAACCGCCGCCGCCACAACACACG	TGCAGCGTCGTCCGCTGCACATGACACCGCAACATCGCTTGAACCGCCGCCGCCACAACACACG	12	10	NA	NA	65	0	62	33	72	0	38	0	30	0	34	0	145	0	37	0	60	0	52	0	33	0	34	11	57	20	33	0	40	0	42	0	18	11	41	0	45	0	NA	NA	43	0	22
TP182223	TGCAGCGTCTCGTCTACTCCACTTGCTCTGTGCATTGGGCTGAAAATGAGGGAGTCATTTCGGA	TGCAGCGTCTCGTCTACTCCACTTGCTCTGTGCATTGGGCCGAAAATGAGGGAGTCATTTCGGA	5	69	8	23	9	101	52	72	0	99	13	38	12	36	0	26	148	158	0	39	70	66	23	51	12	67	0	82	65	101	0	68	12	28	8	93	2	103	0	61	9	39	14	31	39	110	11
TP182788	TGCAGCGTCTTTTCAATTCGTTGCGTGCCAATGGACTGTTGACCGACCATCTCCGCAACTTGAC	TGCAGCGTCTTTTCAATTCATTGCGTGCCAATGGACTGTTGACCGACCATCTCCGCAACTTGAC	5	83	47	7	103	1	106	4	133	11	99	11	29	6	83	9	166	43	134	0	93	5	87	0	78	0	103	0	117	8	44	40	18	3	133	0	129	0	72	0	58	48	63	1	89	9	25
TP183829	TGCAGCGTGCATGAGAACCCAGACACAATTGAGGCGAACGGAAAAGGCGAGCTGGTGGCGTATG	TGCAGCGTGCATGAGAACCCAGACACAATTGAGGCGAACGGAAAAGGCGAGCTGGCGGCGTATG	0	110	0	95	0	119	0	206	4	122	0	99	0	48	0	95	15	339	46	75	45	253	0	99	0	91	8	96	0	169	0	127	15	82	9	183	23	67	21	90	0	87	0	94	5	147	0
TP185109	TGCAGCGTGGCCAGCTCCACCAGCAGTTCCACCGCTTTGTTGTAGTTGCGCTTGAGCTTCCCCA	TGCAGCGTGGCCAGCTCCACCAGCAGTTCCACCGCTTTGTTGTAGTTGCGCTTGAGCTTCCCAA	0	102	2	62	1	131	3	157	2	89	4	130	2	56	1	90	2	189	1	93	3	119	2	89	0	42	1	73	0	109	0	82	0	88	2	146	4	135	3	82	4	81	0	74	3	138	2
TP186373	TGCAGCGTGTGCTTTCGGGCCGTGCGCCGCCGATGCGCATCGGCATGTCGTGCCAACCACCGCA	TGCAGCGTGTGCTTTCAGGCCGTGCGCCGCCGATGCGCATCGGCATGTCGTGCCAACCACCGCA	65	15	64	47	71	25	72	12	60	29	65	8	54	17	55	20	229	46	47	13	111	47	46	49	39	45	51	11	52	4	58	26	52	10	47	30	41	6	27	4	41	23	45	10	70	30	18
TP187558	TGCAGCGTTTGGTGGTCGCCGAAGAACGGGGCAATGCGGCGGAGAGTCAGCGCATTGGCAGAAG	TGCAGCGTTTGGTGGTCGCCGAAGAACGGGGCAATGCGGCGGAGAGTCAGCGCATCGGCAGAAG	48	82	21	117	49	121	131	196	67	161	35	95	5	38	12	74	48	298	104	56	126	141	3	105	28	106	81	65	64	152	0	174	100	78	129	115	148	90	102	38	50	105	36	80	56	107	49
TP187569	TGCAGCGTTTGGTTTGGTTGGCGGCGGTTTTGATTGATTACGGGCGGGCGCAGGCCGTGCGCGC	TGCAGCGTTTGGTTTGGTTGGCAGCGGTTTTGATTGATTACGGGCGGGCGCAGGCCGTGCGCGC	9	25	79	10	75	26	131	15	76	5	78	0	22	17	35	14	137	44	67	15	85	7	65	37	31	10	43	0	97	21	62	12	32	1	100	22	78	7	77	0	52	14	25	24	22	45	12
TP187821	TGCAGCTAATAAAAAATTGGAACAAAAAATATTTGAAGAAATATTTGGCGAAAATGGGAAGATG	TGCAGCTAATAAAAAATTGGAACAAAAAACATTTGAAGAAATATTTGGCGAAAATGGGAAGATG	NA	NA	17	18	8	44	12	18	1	23	4	20	2	20	NA	NA	13	63	11	15	5	45	12	33	13	14	NA	NA	8	42	18	27	12	17	2	35	3	25	1	36	NA	NA	NA	NA	17	13	NA
TP187970	TGCAGCTACCATAGCTACAGCTAGGGATATGCGGATTTTTAACCTTGGCATTGTGAATATGAGC	TGCAGCTACCATAGCTACAGCTAGGGATATGCGGATTTTTAACCTTAGCATTGTGAATATGAGC	4	60	0	55	1	57	2	65	1	39	1	36	1	34	3	30	12	63	0	46	6	91	2	67	0	46	1	37	1	53	0	38	4	86	2	60	5	54	7	85	4	34	0	27	3	61	5
TP188664	TGCAGCTATTGGTGAAAATGAACAGCAACCGATGGGTTCACTCGTGACATCAAGCAAAATGAAA	TGCAGCTATTGGTGAAAATGAACAGCAACCGATGGGTTCACTCGTGACATCAAACAAAATGAAA	49	18	88	36	29	28	74	36	40	30	22	23	11	18	39	16	25	46	38	41	35	25	34	45	27	39	15	5	48	31	76	19	19	23	15	13	9	16	6	21	27	20	NA	NA	68	34	37
TP188761	TGCAGCTCAAAGCCGACGCGACAGTAGCGCCAATAGGCGGGAAGCAGAAAGCGCAGCGACGGGT	TGCAGCTCAAAGCCGACGCGACAGTAGCGCCAATAGGCGGGAAGCAGAAAGCGCAGCGACGGGG	56	1	51	1	20	0	116	6	128	0	91	1	24	0	61	2	181	4	86	1	122	3	110	1	91	2	56	1	80	2	79	4	103	0	76	1	48	2	37	0	74	3	32	3	61	0	68
TP188858	TGCAGCTCAACCGATCAACGATGAGTGAGATCAGGGCAGTATAAAAGAATTGCAAATTTGAAAA	TGCAGCTCAACCGATCAACAATGAGTGAGATCAGGGCAGTATAAAAGAATTGCAAATTTGAAAA	21	27	51	13	26	30	0	65	55	16	33	42	21	1	11	19	114	25	1	48	9	18	16	25	49	0	2	29	18	51	43	6	32	23	24	40	0	56	0	58	10	25	18	12	16	41	4
TP189535	TGCAGCTCACCGCTTCCCTCCTGCTGCTGCTGTAACGCAAGGAACGTGGACCAATTCACGTTGT	TGCAGCTCACCGCTTCCCTCCTGCTGCTGCTGTAACGCAAGGAACGCGGACCAATTCACGTTGT	6	65	14	112	10	86	9	106	12	90	5	69	5	41	2	41	33	194	0	101	20	66	5	106	12	51	0	33	7	71	17	71	9	88	12	119	15	104	18	76	6	70	0	40	14	106	3
TP189943	TGCAGCTCAGCGAATGTTTGGGTGGTCAGGACTTGAATTTGTTGAGCACTTATGGCGCATTTTC	TGCAGCTCAGCGAATGTTTGGGTGGTCAGGACTTGAATTTGTTGAGCACGTATGGCGCATTTTC	17	6	23	7	37	11	32	53	7	15	42	13	NA	NA	19	15	51	33	6	39	23	37	46	9	33	14	21	35	19	33	26	12	15	27	52	32	22	30	4	25	16	12	24	20	39	7	9
TP190738	TGCAGCTCCACCCGCCGAGATTTGATCGCCCATATGTCATCGGGCTTCGTCCGCCAGAGCAAAC	TGCAGCTCCACCCGCCGAGATTTGATCGCCCATATGTCATCGGGCTTCGTCCGCCAGAGCAAAA	0	28	0	39	2	35	0	53	0	56	0	47	0	28	0	28	2	167	0	25	0	50	0	76	0	43	NA	NA	0	40	1	40	0	46	NA	NA	0	30	NA	NA	0	23	1	37	0	29	1
TP191465	TGCAGCTCCCCGAGAAAGGGCTGGACGAGTGGAGAACATTGAACGAATTGCGTACCATCGCCGC	TGCAGCTCCCCGAGAAAGGACTGGACGAGTGGAGAACATTGAACGAATTGCGTACCATCGCCGC	40	46	75	2	89	8	106	0	73	4	92	0	20	10	54	6	180	0	32	37	105	0	89	0	55	0	35	16	115	0	73	5	58	22	58	62	60	47	26	80	63	4	42	0	67	23	53
TP192716	TGCAGCTCCTTCAGCATCCATGTCCTTTCGATGTTCATGTCGGGTAAGCTCAGGTAAATGCGTC	TGCAGCTCCTTCAGCATCCATGTCCTCTCGATGTTCATGTCGGGTAAGCTCAGGTAAATGCGTC	79	7	24	0	47	33	87	15	93	10	77	21	38	11	44	10	81	112	71	0	91	24	50	30	51	2	45	0	81	13	68	2	90	16	83	11	96	2	45	3	48	0	61	5	102	9	24
TP193809	TGCAGCTCGATAGTCTTGGTCTCGAAACAGAGATTTTTACATCCCAAGGGATTGGATTTTTGGT	TGCAGCTCGAGAGTCTTGGTCTCGAAACAGAGATTTTTACATCCCAAGGGATTGGATTTTTGGT	0	28	0	56	0	37	16	53	0	46	0	43	NA	NA	0	32	0	53	0	48	5	45	0	25	0	36	NA	NA	3	33	0	50	0	49	0	36	1	31	0	55	NA	NA	0	30	0	28	NA
TP197167	TGCAGCTCGGCTACGTGGTCACCGATCTTTTTGAGGTTGGCCACTGCTTAAAAAACTTTGTCAT	TGCAGCTCGGCTACGTGGTCACCGATCTTTTTGAGGTTGGCCACTGCTTAAAAAACTTTGTCAA	24	2	47	2	30	2	58	0	39	1	37	3	NA	NA	27	2	112	10	32	1	54	2	20	5	32	1	46	2	27	0	51	5	77	0	88	0	67	0	95	1	38	3	30	5	36	21	34
TP197169	TGCAGCTCGGCTACGTGGTCACCGATCTTTTTGAGGTTGGCCACTGCTTAAAAACTTTGTCATA	TGCAGCTCGGCTACGTGGTCACCGATCTTTTTGAGGTTGGCCACTGCTTAAAAACGTTGTCATA	118	0	113	0	117	0	179	0	173	0	181	0	77	0	114	0	555	0	176	0	232	0	133	0	82	0	153	0	142	0	213	0	223	0	282	0	156	0	233	0	131	0	79	0	64	0	109
TP199433	TGCAGCTTTTCCTTTCTCTCTTTTGCAGTGTGCCGTACGAAGGCTTCAGGGCGTTGAGGGGTTC	TGCAGCTCTTCCTTTCTCTCTTTTGCAGTGTGCCGTACGAAGGCTTCAGGGCGTTGAGGGGTTC	49	0	120	1	161	0	80	38	59	0	118	0	76	0	63	0	222	0	96	0	157	2	133	0	82	1	43	8	58	24	114	3	98	0	130	15	51	31	74	3	52	2	61	0	77	0	52
TP199735	TGCAGCTCTTTCGTGAAAATTTGTTTAAAATTTTGGAAAATGCAAAAAATAATTCGGACAAATC	TGCAGCTCTTTCGTGAAAATTTGTTAAAAATTTTGGAAAATGCAAAAAATAATTCGGACAAATC	2	52	12	114	6	129	5	118	1	87	3	106	2	30	7	93	7	192	0	60	9	156	10	137	0	54	2	58	2	125	8	124	15	100	4	91	0	52	0	58	4	53	3	39	0	76	1
TP199878	TGCAGCTGAAAGCGTAAGTGAAGCGGGAGCCCAACCAACAGAACAAGCAGCTGAACAGCCGACC	TGCAGCTGAAAGCGTAAGTGAAGCGGGAGCCCAACCAACAGAACAAGCAGCCGAACAGCCGACC	30	0	34	2	47	0	43	17	22	0	NA	NA	NA	NA	22	0	31	0	38	0	55	3	38	0	26	0	36	8	14	17	NA	NA	17	7	14	15	32	0	37	1	30	0	23	0	27	0	NA
TP199948	TGCAGCTGAACACGCTGTCCAAACTGACATTTGCGGACGCACGGCGCTTTCGCGTGCTTTTGGA	TGCAGCTGAACACACTGTCCAAACTGACATTTGCGGACGCACGGCGCTTTCGCGTGCTTTTGGA	15	9	11	70	4	32	8	53	4	22	7	18	NA	NA	11	13	59	40	10	43	10	47	6	35	0	34	11	9	6	41	8	24	11	20	43	7	NA	NA	52	0	18	22	5	22	8	20	5
TP199999	TGCAGCTGAACATTGCTCTTACTCGGAGCAAATTGCGATCCCCCAGCCTTTGCCTGCTGCGGAT	TGCAGCTGAACATTGCTCTTACTCGGAGCAAATTGCGATCCCCCAGCCTTTGCCTGATGCGGAT	49	11	84	11	92	19	57	79	32	14	111	8	23	11	25	10	52	94	141	6	29	109	88	3	24	22	3	36	36	83	93	0	81	1	28	95	39	52	36	71	40	18	14	16	113	8	54
TP200025	TGCAGCTGAACCCGTTGCTTCTGTTGTTGAACCTCCAGCAGCAACAACAACAAATACAACAGAA	TGCAGCTGAACCCGTTGCTTCTATTGTTGAACCTCCAGCAGCAACAACAACAAATACAACAGAA	79	0	87	3	108	1	129	0	84	6	81	0	36	0	29	6	144	0	82	0	72	12	74	0	72	0	30	6	125	0	56	0	83	0	102	8	58	9	83	0	51	0	34	0	47	3	35
TP200075	TGCAGCTGAACGCAAGGCGTACGAGGCGAGCGAAAGCCAACGCGTGCAGGAAGCGTTGGAGCAG	TGCAGCTGAACGCAAGGCGTACGAGGCGAACGAAAGCCAACGCGTGCAGGAAGCGTTGGAGCAG	5	71	8	47	6	64	0	49	29	43	0	96	13	39	11	49	75	127	30	38	20	35	26	20	22	15	0	47	3	32	6	64	21	32	18	92	0	34	1	47	20	67	24	35	28	67	22
TP200140	TGCAGCTGAAGAAGTCGGAAGTTGAGCGTGAACTGACCAATGAGCGGTTGCGCAATTCGACACG	TGCAGCTGAAGAAGTCGGAAGTTGAGCGTGAACTGACCAATGAACGGTTGCGCAATTCGACACG	23	3	49	3	72	2	35	11	26	11	37	7	27	12	36	7	99	12	55	0	58	4	34	8	40	6	12	18	44	13	49	0	NA	NA	24	17	24	8	1	31	24	1	NA	NA	44	0	NA
TP200454	TGCAGCTGACACCCGCTCTTCTCCCTCCTCCTCCTCCTTGGCTATTTCGGACATCGGTTTCGAG	TGCAGCTGACACCCGCTCTTCTCCCTCCTCCTCCTCCTTGGCAATTTCGGACATCGGTTTCGAG	6	25	24	0	21	22	32	5	36	8	40	19	19	14	NA	NA	27	61	20	16	39	9	14	9	34	2	16	23	30	11	22	6	15	6	34	16	12	14	22	16	NA	NA	18	2	17	29	3
TP200706	TGCAGCTGACGACACTGGTAATTGTCCCATCAATTAGACAGGAAATAGAACTGAATAATTGCCT	TGCAGCTGACGACACTGGTAATTGTCCCATCAATTAGACAGGAAATAGAAATGAATAATTGCCT	63	0	47	0	49	0	50	0	55	0	92	0	53	0	50	0	149	0	62	0	63	0	69	0	60	1	44	9	46	0	32	0	43	0	36	19	21	11	4	30	20	3	48	0	81	0	NA
TP200915	TGCAGCTGAGAGGTCTGGCGCATGATTGTGCCAATTGCGCTGGTGATTTCGGCATTCGAAGATG	TGCAGCTGAGAGGTCTGGCGCATGATTGTGCCAATTGCGCTGGTGATTTCCGCATTCGAAGATG	231	0	178	0	263	2	226	126	277	0	249	0	202	0	210	0	570	0	233	0	386	67	324	0	202	0	112	78	221	101	217	0	218	46	344	16	258	12	163	93	198	17	153	0	330	0	167
TP201121	TGCAGCTGAGTTCAGCAATGGAACTGGTCAAAGCAGCTTATCGTATTTTGTTCGGATGGAGTGA	TGCAGCTGAGTTCAGCAATGGAACTGATCAAAGCAGCTTATCGTATTTTGTTCGGATGGAGTGA	53	19	0	79	1	86	1	103	3	60	3	46	3	27	0	53	0	123	0	90	6	122	18	61	5	53	7	21	6	72	0	61	NA	NA	9	53	6	57	0	66	0	38	NA	NA	1	75	22
TP201211	TGCAGCTGATCAACAACCAACATTGGCGCCCGATTTTGCTCCTACTGCTGATCAACAACAACAG	TGCAGCTGATCAACAACCAACATTGGCGCCCGATTTTGCTACTACTGCTGATCAACAACAACAG	11	26	NA	NA	9	98	12	77	3	44	20	31	17	32	14	27	11	139	0	50	22	75	0	68	9	42	3	38	4	73	0	45	26	44	2	76	35	16	4	60	43	30	3	25	15	51	3
TP201247	TGCAGCTGATCACCCATGGCATCGTCAGCTCCGCCACCACCGCCTCCACTTTGCTGGTCGTGTT	TGCAGCTGATCACCCACGGCATCGTCAGCTCCGCCACCACCGCCTCCACTTTGCTGGTCGTGTT	0	210	3	180	0	251	0	283	0	128	0	130	0	92	0	110	0	358	1	144	0	289	0	189	2	215	14	88	0	234	0	148	3	206	111	286	48	267	105	207	7	123	0	99	0	281	0
TP201659	TGCAGCTGATGAAGCGGTGAAATTGTGTCGCTTATTCTCCCAATGAGTGATGGAGCGGAGGTTA	TGCAGCTGATGAAGCGGTGAAATTGTGTCGCTTATTCTCCCAATGAGTGATGGAGCGGAGGTCA	13	33	26	15	5	38	16	48	15	28	0	26	3	19	0	47	39	54	38	5	21	11	3	30	10	22	20	14	24	37	2	29	9	29	11	61	60	20	21	3	19	29	NA	NA	15	26	NA
TP201725	TGCAGCTGATGATGTTGACGCTGGTCGTGCACCGAAACGACGCTCTCTTCCCGACTCACAGATT	TGCAGCTGATGATGTTGACGCTGGTCGTGCACCGAAACGACGCTCTCTTCCCGACTCACAGAGT	0	23	0	60	3	70	NA	NA	0	43	1	22	2	48	0	34	1	113	0	34	0	61	1	86	1	46	NA	NA	0	22	1	53	NA	NA	0	32	NA	NA	0	0	NA	NA	0	21	0	100	0
TP201870	TGCAGCTGATGGTTGCACCGCGTATTTTCTCGACTGGGCGGGTCAGTTGAATGAATGAATGTTG	TGCAGCTGATGGTTGCACCGCGTATTTTCTCGACTGGGCGGGTCAGTTAAATGAATGAATGTTG	58	0	242	0	99	0	182	14	70	3	85	0	30	0	56	0	114	0	91	0	49	12	49	0	50	0	39	6	191	2	145	2	109	0	142	0	86	0	62	0	50	0	41	0	81	0	84
TP201915	TGCAGCTGATGTTGTCCTCCTCCAATTTGTTGTAGTTGGTCATGGTGATTGTTGCTGCCAATGC	TGCAGCTGATGTTGTCCTCCTCCAATTTGTTGTAGTTGGTCATGGTGACTGTTGCTGCCAATGC	0	67	2	53	0	111	98	97	0	61	0	91	5	40	0	52	0	78	0	37	35	63	1	59	9	46	31	25	87	121	4	35	0	61	67	85	85	44	39	61	33	62	0	28	0	51	0
TP202857	TGCAGCTGCCCCTACCACCGTCTGCGGAGTTGGTGGCATGTACGACGATGGTGCGGACGATGTG	TGCAGCTGCCCCTACCACCGTCTGCGAAGTTGGTGGCATGTACGACGATGGTGCGGACGATGTG	61	0	65	10	157	0	201	0	101	6	26	48	52	4	68	0	219	16	83	0	104	17	76	4	63	8	74	0	124	3	13	73	84	17	103	14	104	0	42	0	89	2	28	0	73	0	48
TP203332	TGCAGCTGCCTTCGGAGCGGGAATTGTAATGCTTCGCTTTCTTCATTTTTTTCAAATTGCATTT	TGCAGCTGCCTTCGGAGCGGGAATTGTAATGCTGCGCTTTCTTCATTTTTTTCAAATTGCATTT	6	42	15	18	19	62	9	110	5	65	24	60	0	33	4	24	9	159	0	75	7	106	13	64	40	34	25	15	3	55	0	50	NA	NA	34	29	47	23	51	26	13	45	0	29	8	87	16
TP203646	TGCAGCTGCGCCACCTCGCGCAACAGTCGTGCCAGCCGATCACTGTAGCTGACGTTCAGCACGC	TGCAGCTGCGCCACCTCGCGCAACAGTCGCGCCAGCCGATCACTGTAGCTGACGTTCAGCACGC	0	23	0	37	0	34	3	40	NA	NA	0	43	NA	NA	NA	NA	0	75	0	34	2	47	0	30	0	20	9	16	4	29	0	26	7	19	2	19	2	21	11	14	0	24	NA	NA	0	24	NA
TP204778	TGCAGCTGCTAATGTCATTACTAATGGCCAAGAAGAACACCACGAGACTGAAAGGACGGCGGTC	TGCAGCTGCTAATGCCATTACTAATGGCCAAGAAGAACACCACGAGACTGAAAGGACGGCGGTC	0	40	0	34	0	60	7	63	0	57	0	56	0	30	0	25	0	98	0	45	0	91	0	48	0	52	0	29	6	51	0	27	0	44	0	58	0	35	0	62	0	21	NA	NA	0	47	0
TP204848	TGCAGCTGCTCACTGCTGCCCGATGGAGGAGGAGGAGCAACAGCAATCCATGGACAAGGAGCAG	TGCAGCTGCTCACTGCTGCCCGATGGAGGAGGAGGAGCAACAGAAATCCATGGACAAGGAGCAG	68	0	99	0	70	0	106	1	82	4	77	0	51	0	53	0	146	0	81	0	109	11	91	0	55	0	25	13	123	5	31	0	74	0	116	0	97	13	37	6	52	0	29	0	95	0	63
TP206179	TGCAGCTGCTTCAGTAATTATGGCACAAAATTTGGCAATGGCTGCTGCTGCGGCGGCGGCTAAG	TGCAGCTGCTTCAGCAATTATGGCACAAAATTTGGCAATGGCTGCTGCTGCGGCGGCGGCTAAG	8	32	NA	NA	2	25	52	13	NA	NA	21	12	NA	NA	2	26	22	70	3	33	25	26	12	26	7	20	NA	NA	29	2	40	4	16	13	30	13	19	10	30	4	15	5	11	23	11	16	14
TP206324	TGCAGCTGCTTGGCCTGGAGGTTTAAAAGCAGTAATGATTAATTTATTTTTCCCACTTTTTCCG	TGCAGCTGCTTGGCCTGGAGGTTTAAAAGCAGTAATGATTAATTTATTTTCCCCACTTTTTCCG	0	111	0	103	0	185	79	48	1	107	0	129	0	50	0	34	0	247	0	126	14	122	0	95	8	150	28	77	57	41	11	109	21	112	39	165	42	126	11	110	15	146	0	72	0	184	0
TP207417	TGCAGCTGGCCCCGCCTTGGCATTGTGCGCTGTCTTCGCAGCGTTCGCCGATTGCGACTCTCTT	TGCAGCTGGCCCCGCCTTGGCATTGTGCGCTGTCTTCGCAACGTTCGCCGATTGCGACTCTCTT	125	0	81	0	144	0	294	0	124	0	136	0	60	0	110	0	320	0	97	0	207	0	212	0	107	2	135	4	146	0	135	0	148	0	140	58	159	26	109	12	52	0	93	0	180	0	72
TP208374	TGCAGCTGGTAGCCCTCAAACCCACACTGTTGAAGAGATGAAGGAACAAAATCAAGAAGATGTT	TGCAGCTGGGAGCCCTCAAACCCACACTGTTGAAGAGATGAAGGAACAAAATCAAGAAGATGTT	20	4	15	14	21	42	73	14	27	8	27	7	5	17	13	16	46	43	NA	NA	89	16	28	11	9	15	59	0	63	10	28	7	17	13	49	1	77	2	104	0	22	8	NA	NA	36	29	6
TP208635	TGCAGCTGGGCGCGGCGGTCGGCCAGCCCGAGGACGATGGCGCGCGCCAGGCACTATCGGTCGC	TGCAGCTGGGCGCGGCGGTCGGCCAGCCCGAGGACGATGGCGCGCGCCAGGCACCATCGGTCGC	0	73	0	67	0	55	0	94	0	54	0	75	0	39	0	77	0	225	5	69	0	143	0	63	0	56	0	91	0	84	0	85	0	48	0	111	0	100	0	91	0	108	0	52	0	71	0
TP209444	TGCAGCTGGTGCCAGCGAGCGGCGACTGTAGGGCGCCGTTTTGGTAAGCGACTGTGCCACCAGC	TGCAGCTGGTGCCAGCGAGCGGCGACTGTAGGGCGCCGTTTTGGTAAGCGACTGTGCCACCACC	NA	NA	0	33	0	26	0	36	NA	NA	0	40	0	27	0	21	0	124	0	22	1	52	0	43	NA	NA	NA	NA	2	20	NA	NA	0	34	NA	NA	6	18	13	14	0	33	0	21	0	24	NA
TP209839	TGCAGTTGTACACGACCACGACAACAACGGCACAGCAGCGACACTTTGTAATGGAAAAAACAAT	TGCAGCTGTACACGACCACGACAACAACGGCACAGCAGCGACACTTTGTAATGGAAAAAACAAT	0	52	NA	NA	6	31	3	117	6	33	0	25	11	12	4	24	5	148	9	21	11	48	7	21	0	63	0	39	0	70	47	15	10	51	3	52	0	70	0	50	0	39	3	20	0	50	0
TP210369	TGCAGCTGTGAATTCATCGACAAATTCGACGACGGCGGCGGCGGCGGTGTTCGATAGCAACAAA	TGCAGCTGTGAATTCATCGACAAATTCGACGACGACGGCGGCGGCGGTGTTCGATAGCAACAAA	10	31	101	0	105	20	76	98	100	1	103	0	24	10	61	4	242	0	10	78	89	41	91	14	74	7	59	20	62	40	74	0	76	23	127	32	83	86	47	36	48	18	53	11	123	0	43
TP211165	TGCAGCTGTTGCTGATACTGCTGCAACTGGTGGTGCTTTTGTTGCAGTTGCATGTACTGCTGTT	TGCAGCTGTTGCTGATACTGCTGCAACTGGTGGTGCTTTTGTTGCAGTTGCAGGTACTGCTGTT	30	0	4	31	31	0	12	20	20	14	30	12	6	16	NA	NA	40	64	21	4	48	8	27	2	26	0	30	0	22	16	7	20	5	24	27	4	19	2	NA	NA	16	6	20	0	23	7	NA
TP211173	TGCAGCTGTTGCTGCTGACAATGGGCAGCAGAGAAAAAAACATACGCATTCACTCACCCCCAAA	TGCAGCTGTTGCTGCTGACAATGGGCAGCAGAGAAAAAAACATACGCATTCACTCACCCCAAAA	3	87	4	56	4	81	7	156	2	72	6	75	0	42	0	36	11	189	1	70	6	92	2	73	8	88	2	55	3	96	2	83	4	101	7	115	4	99	5	62	1	30	2	49	2	82	2
TP211254	TGCAGCTGTTGTTTTGGTAGTTGTTGTTGCTGCTCCTTCGGATGCTCAGTTTTCGTCCAACTGC	TGCAGCTGTTGTTTTGGTAGTTGCTGTTGCTGCTCCTTCGGATGCTCAGTTTTCGTCCAACTGC	11	28	0	22	0	32	14	52	1	31	0	49	0	20	0	24	0	73	0	36	2	56	0	70	0	24	4	19	8	35	2	43	7	18	21	33	25	32	14	21	9	32	0	34	2	35	NA
TP211407	TGCAGCTTAATCACTTTTGCCATTCTTCTTTTTTCTATGTTGATTGAGGCAAGATTCTTGGACA	TGCAGCTTAATCACTTTTGCCATTCTTCTTTTTTCTATGCTGATTGAGGCAAGATTCTTGGACA	27	0	48	0	43	0	42	4	34	0	35	0	35	0	44	0	131	0	43	0	60	1	45	0	36	0	24	0	55	15	27	0	33	0	23	0	25	0	39	0	26	0	20	0	42	0	30
TP211445	TGCAGCTTACCAATTGCATCAAACGGCACAAAGTTCTCGCCGTCTGTCTTTAGCCGATTCGAAA	TGCAGCTTACCAATTGCATCAAACGGCACAAAGTTCTCGCCGTCCGTCTTTAGCCGATTCGAAA	818	15	1669	53	939	55	1941	24	963	17	1161	4	674	43	928	6	3105	131	1679	57	2311	27	1136	48	813	20	931	6	1741	20	1000	48	1132	43	1675	0	1419	12	1344	0	999	24	586	7	1064	7	568
TP211534	TGCAGCTTATGTTGGTGAGGAATAAAAATGAAATTATTGCACCGCACCTCCTTAAACGGCAGTT	TGCAGCTTATATTGGTGAGGAATAAAAATGAAATTATTGCACCGCACCTCCTTAAACGGCAGTT	7	60	0	58	1	46	0	52	0	59	0	56	0	30	NA	NA	0	180	15	83	0	79	0	57	0	42	0	22	0	59	0	46	0	59	0	82	0	60	0	55	3	28	NA	NA	0	64	0
TP211559	TGCAGCTTATCTCGTCTTTGCCGCTTCTTTTGCTTCCGCTTTTTGTCCTTTTCAATCTTTGGAA	TGCAGCTTATCTCGTCTTTGCCGCTTCTTTTGCTTCCGCTTTTTGCCCTTTTCAATCTTTGGAA	76	0	85	0	75	0	118	0	68	0	78	0	46	0	73	0	176	0	85	0	108	1	105	1	45	0	72	0	72	0	35	0	117	0	128	0	59	10	37	0	64	0	76	0	111	0	61
TP211603	TGCAGCTTCAAAAGAACGCAAACGCTCGAGAATGGTTTGGTATTGAGCATTTTCCTCCACCGTG	TGCAGCTTCAAAAGAACGCAAACGCTCAAGAATGGTTTGGTATTGAGCATTTTCCTCCACCGTG	187	14	159	44	194	13	259	65	260	38	188	11	115	19	142	5	327	6	198	62	330	66	186	27	131	2	82	23	211	70	168	31	130	37	149	18	98	21	184	44	84	31	98	17	221	25	140
TP212181	TGCAGCTTCATCCGCCAGGCTTCGATCGGCCATACGTCATCGGACTTCGCCCGCCAGAGCAAAC	TGCAGCTTCATCCGCCAGGCTTCGATCGGCCATACGTCATCGGACTTCGCCCGCCAGAGCAAAA	3	176	1	155	1	141	0	121	0	113	0	113	0	55	0	62	1	348	0	116	1	184	1	93	0	97	1	129	2	167	2	157	0	145	0	147	0	171	3	191	0	105	1	47	0	97	0
TP213208	TGCAGCTTCGGTTCGGCGTTCGCTTCAACGCCCACCGTCCCAATTGTTGGACGGGCCGCGCCCC	TGCAGCTTCGGTTCGGCGTTCGCTTCAACGCCCACCGTCCCAATTGTTGGACGGGCCGCGCCCA	NA	NA	1	39	1	28	1	41	1	21	0	41	NA	NA	NA	NA	1	59	2	38	2	51	1	33	3	38	NA	NA	0	32	1	25	1	40	0	47	0	48	1	31	1	36	NA	NA	0	30	2
TP213359	TGCAGCTTCTCCAAAATCCAAATTTCCAACTCATCGGCGTCCCTTTTGAAGTACTGAAATTGAC	TGCAGCTTCTCCAAAATCCAAATTTCCAACTCATCCGCGTCCCTTTTGAAGTACTGAAATTGAC	37	24	31	156	17	75	32	122	13	89	15	85	9	36	12	40	37	128	26	124	26	75	45	80	5	24	31	44	40	91	16	64	31	62	23	62	20	18	21	42	11	35	21	43	23	41	21
TP214485	TGCAGCTTGGCATCACGCTAAAATTACCAAAAAAATGTTAGAGTTATTTTAGGCACTTTTCGAT	TGCAGCTTGACATCACGCTAAAATTACCAAAAAAATGTTAGAGTTATTTTAGGCACTTTTCGAT	20	0	NA	NA	49	1	48	0	23	10	36	34	26	2	19	14	103	4	40	11	43	0	21	0	52	0	NA	NA	32	1	34	44	44	8	NA	NA	33	0	42	0	38	0	25	1	34	0	NA
TP214685	TGCAGCTTGAGCCAGTCGGGTTTCATCCCCTCGCTGGATCGTCTTTCCTTCGACTCGAAAGTCG	TGCAGCTTGAGCCAGTCGGATTTCATCCCCTCGCTGGATCGTCTTTCCTTCGACTCGAAAGTCG	2	25	3	62	0	29	0	129	0	48	0	28	0	41	0	22	0	91	0	76	0	199	0	73	2	50	2	75	0	116	0	56	0	63	16	141	6	139	14	133	9	56	NA	NA	NA	NA	0
TP214986	TGCAGCTTGCAACGGCCCTGTTCCTCGTCATGCTCAAGCCGTACTTTGCCGCCCGCTCTGATCT	TGCAGCTTGCAACGGCCCTGCTCCTCGTCATGCTCAAGCCGTACTTTGCCGCCCGCTCTGATCT	NA	NA	0	51	0	45	0	42	NA	NA	0	34	NA	NA	NA	NA	0	69	0	23	0	45	0	27	0	29	3	28	NA	NA	0	47	0	40	0	22	0	39	0	38	0	32	NA	NA	0	36	0
TP216064	TGCAGCTTGGACTCGAACACGACGGTCTTGGGCCTCTGCTTGCGCAACTCTTTGCCTAATTCGC	TGCAGCTTGGACTCGAACACGACGGTCTTGGGCCTCTGCTTGCGCAACTCTTTGCCCAATTCGC	11	9	38	12	44	5	34	24	17	13	26	8	NA	NA	23	0	56	15	30	20	21	24	41	2	34	8	NA	NA	20	39	47	1	13	18	9	36	23	30	18	37	13	8	NA	NA	50	2	NA
TP218352	TGCAGCTTTTTCCGTTCTTGTCCGCATTGTTCTCCTCCGCTGCTGGCGATGCTTTTCGACCGCG	TGCAGCTTTTGCCGTTCTTGTCCGCATTGTTCTCCTCCGCTGCTGGCGATGCTTTTCGACCGCG	76	0	153	16	110	0	109	23	76	2	59	0	33	2	70	0	176	0	47	0	112	16	56	0	58	0	25	33	63	43	41	0	59	13	22	57	91	44	24	52	43	4	38	0	95	0	31
TP218465	TGCAGGGAAAAAAGCGCCGACTTTTTAGTGCAACGCGTGGCGTTCCTCCCACTCAAACGGCCGA	TGCAGGAAAAAAAGCGCCGACTTTTTAGTGCAACGCGTGGCGTTCCTCCCACTCAAACGGCCGA	65	0	61	3	55	0	56	17	41	6	50	0	22	8	41	6	121	10	21	32	70	11	65	0	42	0	49	0	51	16	48	0	69	0	44	1	37	3	36	0	60	0	20	0	46	0	29
TP218861	TGCAGGAAAATCAGCCTTGGAGACATCTCAAGATCATCATCCAGGTCGAGGATTTGCTCATCGT	TGCAGGAAAATCAGCCTTGGAAACATCTCAAGATCATCATCCAGGTCGAGGATTTGCTCATCGT	3	136	42	107	17	122	2	227	38	126	26	93	2	69	0	108	289	106	83	39	79	268	43	143	55	57	22	62	0	214	9	136	32	77	0	179	13	105	0	141	10	112	22	89	77	144	0
TP218875	TGCAGGAAAATCCCTGCGGATTTACAGTAATCAAGCAGATCGTCACGCTGTAAGAATGGGTGCT	TGCAGGAAAATCCCTGCGGATTTACAGTAATCAAGCAGATCGTCACGCTGTAAGAATGGGTGCA	0	21	0	58	0	20	0	28	0	25	0	35	NA	NA	0	30	0	77	0	52	0	55	0	67	0	30	NA	NA	0	32	0	35	0	29	0	32	0	26	NA	NA	0	27	NA	NA	0	44	0
TP219553	TGCAGGAAAGGGTCGTTGGAGAAGTCGTACGGCTCCAACTGGTGCTGCTGTTGCGGGGGCGAGG	TGCAGGAAAGGGTCGTTGGAGAAGTCGTACGGCTCCAACTGGTGCTGCTGCTGCGGGGGCGAGG	5	43	NA	NA	5	56	17	107	2	49	8	74	7	55	0	30	62	125	0	66	43	96	9	41	14	30	12	77	20	98	0	73	11	54	45	131	13	82	16	105	10	40	0	24	0	72	1
TP219587	TGCAGGAAAGTGAAATAGAGCAAACATTCACTGGTGACATCATCAAACTGTTCGGCACTTCTCT	TGCAGGAAAGTGAAATAGAGCAAACATTCACTGGTGACATCATCAAACTGTTCGACACTTCTCT	54	7	55	27	4	74	81	32	18	22	38	16	13	19	22	29	19	85	40	53	39	47	2	115	14	72	30	9	50	18	33	0	35	0	75	0	65	0	71	2	18	2	38	36	12	66	NA
TP219769	TGCAGGAAATCCGTGCTGCGGTCCAACGGGGCTGTCTGGTGGTGAACGTGTCACAGTGCGCCAA	TGCAGGAAATCCGTGCCGCGGTCCAACGGGGCTGTCTGGTGGTGAACGTGTCACAGTGCGCCAA	0	134	0	59	0	188	53	259	0	176	0	136	0	250	0	285	0	1005	0	196	56	152	0	262	0	109	58	106	25	147	0	133	0	94	0	161	9	173	0	109	0	149	0	105	0	223	0
TP220235	TGCAGGATCAACATGTTTCTGTTCCGCAAAAATCAGCGAAACTGATCAGTTTGTCTTCTGACGA	TGCAGGAACAACATGTTTCTGTTCCGCAAAAATCAGCGAAACTGATCAGTTTGTCTTCTGACGA	19	95	25	35	18	96	20	131	73	54	47	30	8	57	23	1	153	49	10	135	85	49	34	59	29	76	5	44	16	100	33	74	19	68	17	104	9	131	0	102	14	68	41	26	116	0	6
TP221164	TGCAGGAACATATCTTCGGCATCGAACATGTGGAGCGAGTGCGCGAGCAGGGCGTCCAAATGCG	TGCAGGAACATATCTTCAGCATCGAACATGTGGAGCGAGTGCGCGAGCAGGGCGTCCAAATGCG	2	20	NA	NA	5	27	13	40	3	33	0	44	NA	NA	9	11	7	93	18	25	1	55	0	28	4	16	9	53	10	57	0	40	0	22	18	39	2	33	13	34	3	42	NA	NA	0	26	NA
TP222062	TGCAGGAACGCTTTGCACAGTTCGCCAGGGACACGGAATCCATTGGAGCGGAGCGGGTGGGTGG	TGCAGGAACGCTTTGCACAGTTCGCCAGGGACACGGAATCCATCGGAGCGGAGCGGGTGGGTGG	113	19	42	48	49	47	117	83	150	10	35	71	25	66	62	15	145	63	56	48	31	88	79	49	107	0	36	43	68	53	52	31	19	11	63	68	14	64	12	84	49	56	11	70	37	91	66
TP222116	TGCAGGAACGGATGTTCACCTTGCGATCCAATGACTGCTCGAAAGTGGCGATGGACGAAGGAAA	TGCAGGAACGGATGTTCACCTTGCGATCCAATGACTGCTCGAAAGTGGCGACGGACGAAGGAAA	NA	NA	34	33	48	51	41	64	56	18	1	36	44	42	50	31	93	67	26	107	130	134	0	53	115	13	56	59	79	48	78	11	17	22	11	77	42	67	32	91	59	27	29	10	31	33	14
TP223402	TGCAGGAACTTTTTCTCGTTTCCCCTCAGGCAGTGCCGCCTGAGCCATTGCCCATCGAACCGTT	TGCAGGAACTTTTTCTCGTTTCCCCTCAGGCAGTGCCCCCTGAGCCATTGCCCATCGAACCGTT	4	16	NA	NA	7	19	0	36	0	27	3	36	NA	NA	NA	NA	2	62	19	9	0	56	0	38	0	23	0	30	0	46	0	20	NA	NA	0	30	6	32	3	32	0	26	3	30	0	21	NA
TP223495	TGCAGGAAGAACAGTTGCTCACTGAGAGCAGTGCCAATTTTGCCTTTAGCGCTAAAATATTCGG	TGCAGGAAGAACAGTTGCTCACTGAGAGCAGTGCCAATTTTGCCTTTAGCGCTAAAATATTCGC	90	0	88	0	118	0	144	0	103	0	74	0	48	0	63	0	201	0	116	0	101	0	99	0	58	0	87	0	141	0	66	0	51	0	138	0	88	0	110	0	52	0	57	0	141	0	43
TP224368	TGCAGGAAGATGCTGTCGCTGGACAATGCTGCGTATTGATGCCATTTGATGAATCTAAATTTGG	TGCAGGAAGATGCTGTCGATGGACAATGCTGCGTATTGATGCCATTTGATGAATCTAAATTTGG	0	135	NA	NA	8	132	26	160	4	107	0	90	0	60	0	70	89	158	0	131	0	136	0	67	0	66	12	92	25	100	2	54	9	48	5	137	0	63	0	110	28	48	5	75	34	98	6
TP226227	TGCAGGAAGGGCTCCACAAAAGTGGTGGTGCGTTCGGCCCAATGCGGCACTGAATTTAGGGAAA	TGCAGGAAGGGCTCCACAAAAGTGGTGGTGCGGTCGGCCCAATGCGGCACTGAATTTAGGGAAA	0	55	4	85	4	39	4	129	3	37	5	59	4	51	1	39	10	218	4	29	4	118	11	84	7	62	2	51	0	73	0	95	4	20	2	53	2	56	2	55	5	61	4	47	8	36	2
TP226819	TGCAGGAAGTGATCGCGATCACCTGCTCCTGGTGCAAGCGCTCCTACCACAACAAGCGGCACTG	TGCAGGAAGTGATCGCGATCACATGCTCCTGGTGCAAGCGCTCCTACCACAACAAGCGGCACTG	36	0	42	0	98	13	84	6	64	15	64	35	47	0	61	12	176	11	96	2	138	36	87	9	94	17	35	17	80	9	23	35	46	12	122	23	94	15	75	0	76	6	56	9	52	6	40
TP228332	TGCAGGAATTTTTTTCTTTTTTTGCCATCATTAATCCATCAAAAGTGCCGTTGATGACTGTCTC	TGCAGGAATTTTTTTCTTTTTTTGCCATCATTAATCCATCAAAAGTGCCGTTGATGACTGCCTC	11	36	NA	NA	30	22	66	70	29	39	47	36	18	8	44	1	123	93	35	65	66	51	37	35	25	38	43	24	53	70	26	46	2	24	53	78	47	22	28	75	14	49	26	20	19	10	17
TP228456	TGCAGGACAACCACCACCAACACCATGTCGCTTTTGTTGAGGAAAAGCCGTCACCTGTGATTTT	TGCAGGACAACCACCACCAACACCATGTCGCTTTTGTTGAGGAAAAGCCGTCACCTGTGATTTG	33	0	21	1	NA	NA	49	5	67	7	67	3	18	4	25	0	161	13	35	3	77	6	77	5	27	2	24	2	67	2	39	3	NA	NA	67	9	33	7	50	2	41	0	30	0	34	2	32
TP228525	TGCAGGACAGCGAGGAGCAGTTGCAGGAATTGAGCAACAAAAGGATAACACGGAGAGCCGCGGC	TGCAGGACAACGAGGAGCAGTTGCAGGAATTGAGCAACAAAAGGATAACACGGAGAGCCGCGGC	91	0	49	0	135	0	123	44	102	7	110	0	47	0	96	0	313	6	81	0	107	19	123	0	51	0	79	20	101	22	150	0	98	0	129	0	122	41	81	29	95	13	63	0	140	0	41
TP229507	TGCAGTACAGCCGCTGCCTGTCTGGCCAAAAGCATTTGTTGGCACTGCCGTTGGAGCAGTTCAG	TGCAGGACAGCCGCTGCCTGTCTGGCCAAAAGCATTTGTTGGCACTGCCGTTGGAGCAGTTCAG	0	57	2	36	0	74	0	132	0	110	0	89	0	35	0	31	0	177	0	99	0	68	0	110	0	48	0	48	0	81	9	52	0	89	15	110	4	74	32	85	0	51	0	47	0	117	0
TP229658	TGCAGGACAGGAATTCTCAACTCCCTTGGCGGTATCACCCTCACTTTATACAACCCTCTGTACT	TGCAGGACAGGAATTCTCAACTCCCTTGGCGGTATCACCCTCACTTTATACAACCCTCTGTAAT	108	19	70	97	45	4	56	5	29	32	47	11	12	41	53	20	36	115	82	3	35	32	34	26	45	19	15	9	41	0	73	18	48	24	92	4	66	13	58	0	54	5	36	0	113	0	21
TP231156	TGCAGGACCATGCGCGGAAAACACTGATCAGAGCGCAGCGATCGGTCAGCCCCGAAGAGCCACT	TGCAGGACCATGCGCGGAAAACACTGATCAGAGCGCAGCGATCGGTCAGCCCCGAAGAGCCACG	29	2	NA	NA	28	0	44	1	23	1	23	2	NA	NA	NA	NA	87	7	24	0	65	1	39	2	NA	NA	31	0	42	2	NA	NA	23	2	36	0	47	1	28	0	20	0	25	0	35	4	22
TP233015	TGCAGGACGAAGCAGGGCCGTCAACATCTGCTGCATCAACGGAAGAAGCGATGGAGCCTCCGCC	TGCAGGACGAAGCAGGGCCGTCAACATCTGCTGCATCAACAGAAGAAGCGATGGAGCCTCCGCC	20	21	23	40	3	34	11	55	11	33	9	29	10	12	11	31	5	73	19	39	18	55	NA	NA	13	28	6	25	26	30	9	28	0	46	22	28	9	35	NA	NA	0	27	12	23	13	48	0
TP233127	TGCAGGACGAATTGTCTTCCAAAAAGATATTTGTGGAACTTTTTAACTGCAAAGACAATAGCTA	TGCAGGACGAATTGTCTTCCAAAAAGATATTTGTGGAACTTTTGAACTGCAAAGACAATAGCTA	0	52	NA	NA	0	29	0	81	NA	NA	0	44	0	24	NA	NA	0	84	0	26	2	95	NA	NA	0	21	0	28	0	48	1	39	4	47	21	44	13	41	4	89	0	23	NA	NA	0	73	0
TP234247	TGCAGGACGCCAGGCGCGTGCAGGCACGTGATTGAGTCCGAGTAAACGGTTGCGCTGGTGTACG	TGCAGGACGCCAGGCGCGTGCAGGCACGTGACTGAGTCCGAGTAAACGGTTGCGCTGGTGTACG	115	5	106	0	158	24	185	0	137	26	138	0	86	2	131	4	398	11	162	0	315	0	194	0	100	39	115	4	215	0	128	0	227	0	230	0	118	0	196	1	235	0	61	6	203	0	92
TP235642	TGCAGGACGGGCAGCAATTGGACACGTTCATCACGCACTTTCGGTGGGGCCAGAAATTTAAGCA	TGCAGGACGGGCAGCAATTGAACACGTTCATCACGCACTTTCGGTGGGGCCAGAAATTTAAGCA	37	0	28	1	19	6	59	13	53	24	59	18	24	6	46	15	146	0	0	77	60	51	48	5	32	16	22	47	74	21	10	38	40	29	29	27	66	13	73	0	47	10	5	25	48	11	26
TP237020	TGCAGGACTCTGACCGAATGTTGTATTTGTACGCCTCCGATTACACGCTGAATTCGATGCTTTA	TGCAGGACTCGGACCGAATGTTGTATTTGTACGCCTCCGATTACACGCTGAATTCGATGCTTTA	6	95	34	6	18	112	2	132	21	40	0	81	4	36	0	57	0	137	0	74	63	38	0	106	3	82	4	44	4	107	0	81	60	42	51	61	25	56	11	53	8	42	0	52	0	95	27
TP237347	TGCAGGACTTAGTTGGCCATACGGCGGATAACTGAGCGACGAAGAGGGGATGGGGTACAAATTA	TGCAGGACTTAGTTGGCCATACGGCGGATAACTGAGCGACGAAGAGGGGACGGGGTACAAATTA	0	81	0	93	0	162	0	168	0	76	12	110	6	75	4	101	0	238	0	26	0	146	8	156	13	88	0	48	0	89	0	91	NA	NA	9	185	0	77	0	136	0	130	0	57	0	88	0
TP237668	TGCAGGACTTGCTGAGCGCACGCGGCGGCAAGGACGGTTCGGTGCACGTGGTGCAGCCCATCCA	TGCAGGACTTGCTGAGCGCACGCGGCGGCAAGGACGGCTCGGTGCACGTGGTGCAGCCCATCCA	0	34	0	26	0	53	1	68	NA	NA	0	40	NA	NA	0	26	10	108	0	29	80	49	0	61	2	37	28	29	5	47	0	22	0	34	8	48	32	16	22	18	17	38	NA	NA	0	44	NA
TP238033	TGCAGGAGAAGCGAGAGCGGAACAAAACGCGTGGGATGATGATCGGCGCGGCACAGAACGCGGC	TGCAGGAGAAGCGAGAGCGGAACAAAACGCGCGGGATGATGATCGGCGCGGCACAGAACGCGGC	NA	NA	32	0	50	0	49	14	32	1	30	0	23	0	NA	NA	110	0	46	0	35	2	38	0	43	0	18	13	40	7	29	0	NA	NA	22	21	22	4	19	28	50	3	NA	NA	30	0	25
TP239343	TGCAGGAGATTGAGAAGGCTCTGCTGCCTTTTGCGGACACTTCCCCTTCCTATCCAAACGCTGC	TGCAGGAGATTGAGAAGGCCCTGCTGCCTTTTGCGGACACTTCCCCTTCCTATCCAAACGCTGC	28	4	0	23	2	35	15	37	10	21	6	25	NA	NA	NA	NA	18	37	0	22	24	30	2	28	NA	NA	9	33	13	26	21	3	NA	NA	28	35	3	26	12	17	NA	NA	NA	NA	3	20	10
TP239757	TGCAGGAGCAGCAGATGGGTGGCAGCGGTGCATCGACGGGCGGCGGACGCAAACGGAACGCACG	TGCAGGAGCAGCAGATGGGCGGCAGCGGTGCATCGACGGGCGGCGGACGCAAACGGAACGCACG	15	5	10	26	9	35	0	44	27	11	32	7	NA	NA	14	11	53	25	7	43	10	17	8	19	28	4	5	35	6	25	4	18	2	19	3	45	1	32	0	57	4	27	NA	NA	10	12	NA
TP239867	TGCAGGAGCAGCTTGGGCTTTGGCACTGGCAGTTGGGCGCATGCCTGAGGTCAGTCTAATAAGA	TGCAGGAGCAGCTTGGGCTTTGGCACTGGCAGTTGGGCGCATGCCTGAGATCAGTCTAATAAGA	2	26	27	0	25	20	84	23	52	18	16	30	22	20	24	10	102	21	44	3	56	28	18	78	37	14	36	13	57	33	34	38	22	36	46	22	70	0	95	0	17	5	12	9	34	31	17
TP240647	TGCAGGAGCGCCGACACTGGGCACCGCCTCGCAGAAGTCGGCAGCTGGAGGAGCCGTGTCGCAG	TGCAGGAGCGCCGACACTGAGCACCGCCTCGCAGAAGTCGGCAGCTGGAGGAGCCGTGTCGCAG	31	0	39	0	60	0	38	0	NA	NA	38	0	NA	NA	28	0	63	0	52	0	42	0	NA	NA	20	3	NA	NA	35	0	32	3	22	0	37	15	22	3	0	23	38	0	NA	NA	28	0	33
TP242343	TGCAGGAGGACCTGCTGGAAGTTACGCTGCGTCTGGCCCCGTTAGCTCTTCTGTTTCGGGAGGT	TGCAGGAGGACCTGCTGGAAGTTACGCTGCGTCTGGCCCCGCTAGCTCTTCTGTTTCGGGAGGT	85	9	54	5	109	0	206	17	56	12	130	2	80	0	39	20	106	196	133	17	112	34	163	8	125	3	98	0	139	0	80	0	95	20	170	0	162	0	123	0	68	1	38	5	100	7	33
TP243262	TGCAGGAGGGACGGCGATGAGCCAACGGCACAATGCCGTGATGCCCGTGCATTACCCTTCCGTT	TGCAGGAGGGACAGCGATGAGCCAACGGCACAATGCCGTGATGCCCGTGCATTACCCTTCCGTT	27	86	38	9	36	81	80	65	68	111	22	90	53	16	28	44	49	212	129	12	90	86	89	29	47	94	27	49	59	74	29	46	25	76	54	123	63	48	20	52	9	51	43	25	3	137	22
TP243265	TGCAGGAGGGACAGGTTTTGAGGGTTGGGGGCGGGAATGGACGGCAGGCGAACATTTCAAATTT	TGCAGGAGGGACAGGTTTTGAGGGTTGGGGACGGGAATGGACGGCAGGCGAACATTTCAAATTT	45	0	56	0	93	0	75	14	41	0	72	0	68	3	41	0	174	0	56	0	51	1	74	0	43	0	30	0	70	2	57	0	40	0	80	0	36	16	65	2	27	0	30	0	82	0	38
TP243535	TGCAGGAGGTAAAATGACCGTCTGTTCGTTGGGCCAATTTTCAGGTATTTGGGATAGCCAATTC	TGCAGGAGGTAAAATGACCGTCTGTTCGTCGGGCCAATTTTCAGGTATTTGGGATAGCCAATTC	NA	NA	0	26	0	62	0	121	0	26	0	48	0	40	0	34	0	140	0	27	4	137	0	20	0	73	0	77	3	118	3	88	0	53	0	141	0	101	1	133	0	53	0	79	NA	NA	0
TP243629	TGCAGGAGGTCGAATGTCTCGGGGCTTGTGTTAACGCTCCGATGGTGCAGGTCTAATTGCCATA	TGCAGGAGGTCGAATGTCTCGGGGCTTGCGTTAACGCTCCGATGGTGCAGGTCTAATTGCCATA	118	0	107	0	107	0	136	24	87	15	89	0	60	0	89	0	279	0	121	0	65	17	166	0	88	0	81	0	121	12	76	0	97	0	94	0	103	0	104	0	47	0	31	3	105	0	36
TP243934	TGCAGGAGGTTGGAGGCATTCTTAATGGGAGCAGTTTTTTAATTTATTGCTAATAATAGTGTTG	TGCAGGAGGTTGGAAGCATTCTTAATGGGAGCAGTTTTTTAATTTATTGCTAATAATAGTGTTG	1	67	NA	NA	3	70	27	78	6	47	0	63	2	19	0	37	0	136	0	38	11	58	0	40	6	47	0	36	4	81	0	63	4	53	9	87	15	59	0	44	3	21	0	28	1	59	7
TP245592	TGCAGGATCAGATGCAGGTGGAGCGCGAGCGGAACCGCCAAAATTTGAAGACGGCAATGGATGA	TGCAGGATCAGATGCAGGTGGAGCGCGAGCGGAACCGCCAAAATTTGAAGACGGCAATGGAGGA	13	34	0	31	10	79	29	58	0	80	0	73	0	37	0	74	2	168	0	80	12	124	0	96	0	86	2	49	10	79	0	88	0	52	0	90	NA	NA	11	18	0	27	3	68	0	53	3
TP251416	TGCAGGATGTTGAACAAGCAGACATTGCTCAACGTGTCACCATGTTTCGAGTGTTGCTGAAGAG	TGCAGGATGTTGAACAAGCAGACATTGCTCAACGTGTCACCATGTTTCGAGTGTTGCCGAAGAG	14	10	9	13	25	19	38	47	20	23	23	26	14	8	13	12	41	36	18	10	39	43	28	18	13	17	14	18	31	24	21	21	24	23	39	34	15	27	23	25	13	13	13	17	18	14	16
TP251598	TGCAGGATTAATAATTACCTTTTTTGCTAACTTGCTATAGCCTAATACGCATGAAAAACGAGTT	TGCAGGATTAATAATTACCTTTTTTGCTAACTTGCTATAGCCTAATACGCACGAAAAACGAGTT	21	28	7	23	19	32	66	39	11	47	33	8	NA	NA	34	31	NA	NA	44	0	31	40	26	35	NA	NA	29	13	46	7	0	41	NA	NA	13	66	0	27	0	47	2	25	NA	NA	8	27	27
TP251880	TGCAGGATTCTGTGTGCACAATTCTTCCGTCTTTAAATTCCGACGACTCTTTGGCTTTGTAATG	TGCAGGATTCTGTGCGCACAATTCTTCCGTCTTTAAATTCCGACGACTCTTTGGCTTTGTAATG	0	42	8	15	0	22	21	35	21	14	12	11	NA	NA	19	10	36	8	6	14	13	27	21	7	NA	NA	4	20	NA	NA	33	0	7	14	12	47	7	24	0	33	NA	NA	NA	NA	20	13	NA
TP252086	TGCAGGATTTAGTAATAGCGGCAGAATTGACTAATTTGTTGAAGGATTGACTAATTAGCGGCAG	TGCAGGATTTAGTAATAGCGGCAGAATTAACTAATTTGTTGAAGGATTGACTAATTAGCGGCAG	NA	NA	41	5	54	0	71	0	23	0	NA	NA	34	0	53	0	147	0	NA	NA	43	0	34	0	17	7	13	13	59	0	52	4	NA	NA	38	21	7	18	0	32	27	7	33	0	56	0	27
TP252404	TGCAGGATTTGCCTACCTCGGGATCCGTCCCGAGCCTTTTTTTAATTCATTGGGATTGCTCGGG	TGCAGGATTTGCCTACCTCGGGATCCGTCCCGAGCCTTTTTTTAATTCATTGGGATTGATCGGG	15	10	NA	NA	30	3	28	21	18	12	37	10	7	14	NA	NA	70	37	12	20	44	17	45	4	NA	NA	7	21	39	29	23	7	NA	NA	39	28	0	20	4	26	27	12	24	7	14	17	NA
TP252546	TGCAGGCAAAAAGAGAAAGGAAGAAAAAGGCACGGTAAGCAAAAGGCAGAAAAAGGAGGTAAAT	TGCAGGCAAAAAGAGAAAGGAAGAAAAAGGCACGGTAAGCAAAAGGCAGAAAAAGGAGATAAAT	30	6	61	72	48	30	58	16	44	45	32	15	31	30	21	14	93	54	37	23	49	43	82	59	25	20	32	17	61	27	51	27	76	19	63	12	18	18	34	4	NA	NA	19	12	32	24	27
TP252623	TGCAGGCATAATACATTAAACGTGCGAAATGATTTGATCAGTGTCCCGTCACGGCACCACCCAC	TGCAGGCAAAATACATTAAACGTGCGAAATGATTTGATCAGTGTCCCGTCACGGCACCACCCAC	12	34	58	77	29	75	53	161	9	119	41	105	13	26	0	65	3	294	65	50	41	141	0	134	5	101	50	39	25	120	5	66	32	93	43	101	88	16	108	1	20	54	15	30	0	69	29
TP252669	TGCAGGCCAACCCAACAAATTTCCAATCGTTTCGTAAAGAGTTTCAGTGGCACGGGTGTTAACC	TGCAGGCAAACCCAACAAATTTCCAATCGTTTCGTAAAGAGTTTCAGTGGCACGGGTGTTAACC	0	32	0	77	0	50	0	98	0	43	0	60	NA	NA	0	27	0	119	0	43	0	36	0	39	0	38	0	27	2	56	0	42	5	37	6	54	23	35	4	36	5	21	0	25	0	37	0
TP252901	TGCAGGCAACAAATCGCGCCAGCGAATTTTTGTGCTGTGAAAGCACCGAGCCAGGGTAGGGAGG	TGCAGGCAACAAATCGCGCCAGCGAATTTTTGTGCTGTGAAAGCACCGAACCAGGGTAGGGAGG	97	10	57	3	84	0	67	33	36	50	88	8	34	0	65	1	110	34	64	0	52	40	95	2	48	4	45	17	29	45	67	4	26	29	32	35	34	43	25	46	47	11	33	7	49	11	17
TP253409	TGCAGGCAATTGCCTCGGGGCATTTGTCCTGGAAAAGGACGGTATATTCCAGAACAGTGCATTT	TGCAGGCAATCGCCTCGGGGCATTTGTCCTGGAAAAGGACGGTATATTCCAGAACAGTGCATTT	16	19	35	15	13	18	19	46	38	2	38	3	28	0	32	2	81	0	29	0	43	12	16	20	44	7	11	12	13	17	41	0	25	20	31	17	8	30	23	26	15	12	NA	NA	34	7	23
TP253457	TGCAGGCAATGAACGACGAGTGAGGAGCAAAAGACGATCAAATCAATCATACATTTGCATTTGC	TGCAGGCAATGAACGACGAGTGAGGAGCAAAAGACGATCAAATCAATCATACATTTGCATTTAC	36	0	78	0	81	4	44	5	58	0	62	0	26	0	41	0	103	0	27	0	60	26	55	0	31	0	NA	NA	43	10	28	0	49	10	57	4	32	5	27	7	26	7	42	0	49	0	24
TP254088	TGCAGGCACCGCTTGTCATTGACGAGGAATGGATTTGCACGATGCGCGAGGACGTGCCCGAGTT	TGCAGGCACCGCTTGTCATTGACGAGGAATGGATTTGCACGATGCGCGAGGACGCGCCCGAGTT	2	46	0	39	0	49	0	84	0	47	0	61	13	26	3	23	0	91	23	25	0	54	0	25	3	35	12	20	0	53	2	50	4	25	17	15	15	21	22	21	15	31	NA	NA	0	74	0
TP254665	TGCAGGCACTGCCCGAGCTGGTAGAGACAATGGCATCGTCGACTTCGCCGCAGGCGCGGCGTTT	TGCAGGCACTGCCCGAGCTGGTAGAGACAATGGCATCGTCGACTTCGCCGCAGGCGCGGCGTTA	1	146	3	59	1	102	5	177	3	142	1	134	1	52	0	43	3	279	6	124	2	178	0	99	0	68	0	94	1	139	1	93	5	97	1	175	1	155	1	146	3	149	3	36	2	95	1
TP255138	TGCAGGCAGATGAAGCAGTTTTTGCTTTTTCTGTCCGCAACACGCTTGAAGTGCTCCATGTACT	TGCAGGCAGATGAAGCAGCTTTTGCTTTTTCTGTCCGCAACACGCTTGAAGTGCTCCATGTACT	4	39	NA	NA	38	20	16	41	35	28	48	39	18	23	10	18	88	123	33	19	34	67	NA	NA	20	16	10	22	22	39	0	22	21	27	11	15	NA	NA	NA	NA	12	35	16	9	1	21	NA
TP255245	TGCAGGCAGCATGGTAAGTCAGTGTCAGATACAGCTCGAGTGGGTTGAACCCAACGTAGAAGAT	TGCAGGCAGCATGGTAAGTCAGTGTCACATACAGCTCGAGTGGGTTGAACCCAACGTAGAAGAT	39	0	28	0	57	0	80	21	64	0	54	0	28	0	26	13	140	0	39	0	54	0	61	0	33	3	15	12	43	17	44	0	47	0	43	29	18	3	NA	NA	25	0	45	0	58	12	27
TP256595	TGCAGGCATCTCTGTCCGCGTGTCGAATTCCAAGTTGCAGAAATGCCTTTTCGATGTCGGCGAG	TGCAGGCATCTCTGTCCGCGTGTCGAATGCCAAGTTGCAGAAATGCCTTTTCGATGTCGGCGAG	60	34	30	35	18	67	25	144	51	66	34	100	45	30	13	46	34	111	85	80	74	117	56	44	36	51	25	58	26	84	25	116	9	43	27	62	22	96	3	70	19	37	15	33	20	39	12
TP256803	TGCAGGCATTAACATCCAATCGCCGCCTCCGACACCAACGACACTCAAGCAGAATTCGCCACCT	TGCAGGCATTAACATCCAATCGCCGCCCCCGACACCAACGACACTCAAGCAGAATTCGCCACCT	19	51	12	14	12	61	42	62	8	36	48	20	11	26	32	35	14	143	13	48	41	64	54	41	30	11	10	30	31	72	24	16	74	30	15	62	26	35	1	60	25	13	5	25	18	27	20
TP257420	TGCAGGCCAACCCGTCCTCTTCGAGCAGTCCTTTGCCGTCCATTTCCTTCTCCAGGGCGACTGT	TGCAGGCCAACCCGTCCTCTTCGAGCAGTCCTTTGCCGTCCATTGCCTTCTCCAGGGCGACTGT	125	0	75	0	149	0	93	33	81	0	85	0	56	3	93	7	226	0	90	34	69	64	161	0	90	9	37	30	113	38	63	0	139	15	75	68	7	80	0	97	48	12	61	0	95	20	61
TP257983	TGCAGGCCAAGGGCGGTCATAAGCTCACGAATTTCGGCGTCGTTGTTGTATGTTGCATCCGCCC	TGCAGGCCAAGGGCGGTCATAAGCTCACGAATTTCGGCGTCGTTGTTGTATGTTGCATCCGCCA	21	514	18	557	18	507	24	853	9	590	19	491	11	261	11	309	37	992	23	483	10	612	28	723	18	433	10	217	14	492	12	412	14	533	18	591	17	438	18	403	11	236	8	270	19	569	8
TP258084	TGCAGGCCAATAATCTATTATCGTTTAATATACAGACAGACTATAATACCGTATCCGTATTTGT	TGCAGGCCAATAATCTATTATCGTTTAATATACAGACACACTATAATACCGTATCCGTATTTGT	3	28	13	50	25	24	40	48	29	21	0	71	14	34	23	28	22	82	30	21	81	41	0	48	24	7	57	0	19	20	31	6	11	55	36	28	65	8	37	0	18	10	22	12	12	51	2
TP259405	TGCAGGCCAGGGGGTGGCTCTATTAAAAAAATAAAAAATACCAGCATGTAGAGGACCCTTTGGC	TGCAGGCCAGGGAGTGGCTCTATTAAAAAAATAAAAAATACCAGCATGTAGAGGACCCTTTGGC	138	27	98	31	151	0	256	30	195	40	158	5	109	48	145	64	402	5	197	25	252	64	225	4	182	62	81	9	225	18	221	117	126	22	188	10	86	0	44	6	84	34	94	6	138	23	67
TP259458	TGCAGGCCAGGGGGGTGGCTCTATTAAAAAAATAAAAAATAACCAGCATGTAGAGGACCCTTTG	TGCAGGCCAGGGGGGTGGCTCTATTAAAAAAATAAAAAATAACCAGCATGTAGAGGACACTTTG	5	70	1	51	2	55	10	207	4	131	3	109	1	53	3	72	10	121	2	140	3	117	0	37	2	58	3	53	1	70	3	69	3	34	4	132	0	76	0	72	3	79	0	47	6	95	1
TP259469	TGCAGGCCAGGGGGGTGGCTCTATTAAAAAAAATAAAAAAATACCAGCATGTAGAGGACCCTTT	TGCAGGCCAGGGGGGTGGCTCTATTAAAAAAAATAAAAAAATACCAGCATGTAGAGGACACTTT	7	66	21	172	17	125	36	241	20	199	9	131	8	66	12	123	48	241	20	219	12	144	0	30	11	113	9	117	19	123	11	80	7	68	23	223	14	165	6	108	20	155	14	98	30	323	6
TP259474	TGCAGGCCAGGGGGGTGGCTCTATTAAAAAAAATAAAAAATAACCAGCATGTAGAGGACCCTTT	TGCAGGCCAGGGGGGTGGCTCTATTAAAAAAAATAAAAAATAACCAGCATGTAGAGGACACTTT	2	31	3	47	6	64	7	124	2	83	3	63	0	33	1	23	6	111	1	87	2	71	2	24	0	45	2	37	2	48	2	32	2	34	3	112	0	47	2	53	0	66	0	25	4	112	1
TP259487	TGCAGGCCAGGGGGTGGCTCTATTAAAAAAATAAAAAAATACCAGCATGTAGAGGACACTTTGG	TGCAGGCCAGGGGGTGGATCTATTAAAAAAATAAAAAAATACCAGCATGTAGAGGACACTTTGG	59	9	105	5	158	9	170	37	150	22	112	15	71	9	109	11	269	37	139	20	164	6	85	16	110	4	118	9	192	17	82	6	83	24	143	32	120	11	91	10	59	4	97	16	186	23	54
TP259490	TGCAGGCCAGGGGGTGGCTCTATTAAAAAAATAAAAAATACCAGCATGTAGAGGACACTTTGGC	TGCAGGCCAGGGGGTGGATCTATTAAAAAAATAAAAAATACCAGCATGTAGAGGACACTTTGGC	957	102	996	7	1799	36	2251	92	1723	72	1509	89	1053	24	1474	18	3217	167	1764	71	2699	58	2678	102	1586	12	1117	30	2140	46	1559	26	1314	118	2037	128	1185	35	1301	49	808	32	827	20	1364	49	805
TP259819	TGCAGGCCATGGGACTGCGAATTCCGACAAAAATCTCTCAGTGCGTCCGCCAGGGCGAGAAGTT	TGCAGGCCATAGGACTGCGAATTCCGACAAAAATCTCTCAGTGCGTCCGCCAGGGCGAGAAGTT	113	0	117	0	107	0	161	17	126	2	83	0	53	0	122	0	231	0	71	0	102	7	70	0	51	0	35	32	100	15	97	0	59	15	116	24	82	9	72	24	53	20	42	0	175	0	52
TP260074	TGCAGGCCATCGAGAACAACATGTACAGAGCAACAATCTTCCAACACCACCCGATGGGCACGGA	TGCAGGCCATCGAGAACAACATGTACAGAGCAACAATCTTCCAACACAACCCGATGGGCACGGA	99	0	62	0	57	0	102	0	134	1	73	0	35	0	69	1	155	0	79	0	119	0	78	0	84	1	67	0	102	0	41	0	60	0	145	5	93	0	78	0	41	0	37	4	117	0	47
TP260849	TGCAGGCCCAAAAACGTGAGCTGTTGGTTGAAAAGGTGTTGGATGAGCTGTACAAGGACATGCG	TGCAGGCCCAAAAACGTGAGCTGTTGGTTGAAAAGGTGTTGGATGAGCTGTACAAGGACACGCG	100	138	90	105	47	164	133	150	104	133	71	169	69	44	77	114	114	280	91	101	58	114	51	165	60	118	47	68	99	105	73	82	83	117	73	115	3	133	18	85	30	74	51	59	69	93	48
TP260873	TGCAGGCCCAACCCCGTCGTACCTCCGCCGAACGGCGAATGTCCAAGCAAATTGCGCCCGAACA	TGCAGGCCCAACCCCGTCGCACCTCCGCCGAACGGCGAATGTCCAAGCAAATTGCGCCCGAACA	0	34	NA	NA	0	45	0	58	0	20	0	25	NA	NA	0	28	0	76	2	21	0	33	0	27	0	51	9	14	0	29	0	21	0	45	0	38	0	22	0	39	0	23	0	29	0	35	0
TP266272	TGCAGGCCGAGGTACGGTACACACCCGAGACAATTAATTATACTGTAATTAGGGTAATTGTTTC	TGCAGGCCGAGGTACGGTACACACCCGAGACAATTAACTATACTGTAATTAGGGTAATTGTTTC	20	0	20	0	24	0	37	0	48	0	30	0	NA	NA	NA	NA	44	0	28	0	64	0	55	0	26	0	NA	NA	30	0	26	0	32	0	37	0	27	2	30	0	NA	NA	NA	NA	31	0	30
TP266666	TGCAGGCCGATGACCACGCATTTTTGGCATCTGATTGCCTCCAGCGCAATGCGCACGCACGAGT	TGCAGGCCGATGACCACGCATTTTTGGCATCGGATTGCCTCCAGCGCAATGCGCACGCACGAGT	74	3	56	22	46	11	46	45	70	10	50	32	24	33	54	9	89	85	100	1	83	77	76	47	85	15	23	56	70	40	49	10	55	76	36	103	0	96	0	84	38	23	29	0	103	27	25
TP266828	TGCAGGCCGATGGTGGCAAATTGGAGGAGTTCGGTGGTGCTGGTGGCGGCATGGCAACGGCTTC	TGCAGGCCGATGGTGGAAAATTGGAGGAGTTCGGTGGTGCTGGTGGCGGCATGGCAACGGCTTC	38	0	38	0	33	0	54	12	30	0	35	0	21	0	30	0	106	0	37	0	63	0	44	0	28	0	25	3	32	3	30	3	38	0	46	9	NA	NA	17	12	24	0	26	0	30	0	NA
TP268640	TGCAGGCCGCGCTTTCGACGGTGCTTTCGTTGATGATTTTGGTACTGATCCACGCTTACATGTT	TGCAGGCCGCGCTTTCGACGGTGCTTTCGTTGATGATTTTGGTACTGATCCACGCTTACATGGT	NA	NA	0	43	0	46	0	35	0	40	0	45	NA	NA	1	31	0	60	0	39	0	22	0	34	NA	NA	0	36	0	28	NA	NA	0	29	0	34	0	36	0	42	0	46	NA	NA	NA	NA	NA
TP272875	TGCAGGCGAAATTCGTCGGAATTTTCCCCAAACCTTTGCCCCTCTCAAACTTTGTCTTTTGGTC	TGCAGGCGAAATTCGTCGGAATTTTCCCCAAACCTTTGCCCCTCTCAAACTTTGCCTTTTGGTC	28	85	110	92	8	128	27	244	10	157	0	142	5	46	0	90	0	374	0	31	1	238	4	138	2	69	5	103	0	160	0	68	NA	NA	21	156	0	129	0	93	7	104	15	62	0	162	1
TP273497	TGCAGGCGACCATTGAAAGTCTGCTGCGTCTGAACATTATTCCAATTGTGAATGCCAATGACGC	TGCAGGCGACCATTGAAAGTCTGCTACGTCTGAACATTATTCCAATTGTGAATGCCAATGACGC	35	0	40	0	45	4	48	10	53	1	23	0	31	0	25	0	93	0	50	0	77	22	52	0	42	3	25	10	53	21	35	5	42	11	42	19	10	21	9	48	16	5	NA	NA	56	0	NA
TP273953	TGCAGGCGACGGTCAGCAACTGGCCAACCGCGACTGCATCAGCTGTGACATCATTACCGCAATC	TGCAGGCGACGGTCAGCAACTGGCCAACCGCGACTGCATCAGCTGTGACATCACTACCGCAATC	48	6	83	0	82	1	84	7	35	11	60	2	27	0	49	0	108	47	111	0	86	0	83	2	32	0	36	4	95	0	64	0	63	5	109	0	72	0	74	0	84	0	40	0	66	5	50
TP275252	TGCAGGCGATGAGGCAAACATTTGAGGACGAAGAAAGGGAGCAGAGCATCTCCCGATCGAGCAG	TGCAGGCGATGAGGCAAACATTGGAGGACGAAGAAAGGGAGCAGAGCATCTCCCGATCGAGCAG	33	23	133	0	78	0	166	0	57	0	78	0	69	0	73	0	31	0	121	0	351	0	115	0	201	0	113	7	214	0	171	0	92	0	207	0	159	5	180	15	159	0	39	0	140	0	NA
TP277758	TGCAGGCGCCACTAACCCCAAAGGGTCATAAATTTTTGCAATGTGTGCCAAGATGTTCTTCTTC	TGCAGGCGCCACTAACCCCAAAGGGTCATAAATTTTTGCAATGTGTGCCAAGATGTTCCTCTTC	0	62	0	152	12	115	13	147	11	149	10	106	0	44	0	48	0	257	0	94	0	191	2	103	0	82	1	96	1	134	0	108	0	74	0	154	0	206	0	187	1	124	0	40	0	91	2
TP281421	TGCAGGCGCTCTCCAGGCAACTCCGACTCGGTTTCGGATGTTGACCAATTCGACCAGGTAGAGT	TGCAGGCGCTCTCCAGGCAACTCCGACTCGGTTTCGGATGTTGACCAATTCGACCAGGTAGAGG	NA	NA	0	94	0	139	0	141	2	89	0	70	0	52	0	61	0	219	0	110	0	110	0	103	0	57	0	48	0	139	0	110	0	50	0	64	0	30	0	39	0	35	0	38	0	98	0
TP281422	TGCAGGCGTTCTCCAGGCAACTCCGACTCGGTTTCGGATGTTGACCAATTCGACCGAAAAAAAA	TGCAGGCGCTCTCCAGGCAACTCCGACTCGGTTTCGGATGTTGACCAATTCGACCGAAAAAAAA	5	24	22	64	4	34	12	122	11	41	3	29	7	29	NA	NA	39	96	2	82	6	92	19	23	20	42	1	55	0	37	19	33	NA	NA	21	117	5	65	7	70	4	43	0	38	NA	NA	NA
TP282108	TGCAGGCGCTGCTGCAAGCGGAAAAAAGTGTGACAGTTAGCGAGGCGCAAATTCGGCACGAACA	TGCAGGCGCTGCTGCAAGCGGAAAAAAGTGTGACAGTTAGCGAGGCACAAATTCGGCACGAACA	2	45	0	46	0	51	0	77	0	59	0	39	2	33	0	25	0	98	0	57	0	81	0	56	0	35	5	30	0	44	0	29	0	35	0	74	0	56	0	64	0	42	NA	NA	0	48	NA
TP284393	TGCAGGCGGCCAACACTGCAACTGTGCCGCCGCAGGCGGTCTCGGCAACAGTGGCAATCCGTCC	TGCAGGCGGCCAACACTGCAACTGTGCCACCGCAGGCGGTCTCGGCAACAGTGGCAATCCGTCC	71	0	64	0	188	0	129	0	187	0	123	0	77	0	43	0	122	0	202	0	170	0	123	0	130	0	81	0	82	0	188	0	117	0	80	0	138	0	78	0	112	0	92	0	122	0	94
TP285617	TGCAGGCGGCGGCGCGACTGAACGACGCTAAAAGTTACCAGGAATTTTCACGGGCGTCGAATTT	TGCAGGCGGCGGCGCGACTGAACGACGCTAAAAGTTACCAGGAATTTTCACGGGCGTCGAATTG	NA	NA	29	2	41	1	42	2	27	1	27	0	NA	NA	25	1	79	2	61	0	39	2	39	3	25	0	NA	NA	54	0	24	0	27	1	55	2	38	3	39	2	NA	NA	19	2	31	1	28
TP287887	TGCAGGCGGTGTGCCGTCCTCCTCTTCCTCACTGTTTGGGCTGGACGACGGCGACGACGACAGT	TGCAGGCGGTGTGCCGTCCTCCTCTTCCTCACTGTTTGGGCTGGACGACGGCAACGACGACAGT	64	0	72	0	84	39	119	14	65	6	70	6	35	0	21	10	146	0	48	20	67	38	102	0	48	0	36	65	88	5	65	0	67	11	68	19	46	20	58	77	64	14	33	0	87	6	26
TP288392	TGCAGGCGTCCGACGCGGACACAATGGAGGAGGAAGTGAAGGAGGAAATGCTGGACGGAAGCGG	TGCAGGCGTCCGACGCGGACACAATGGAGGAGGAAGTGAAGGAGGAAATGCTGGACGGAAGCGA	28	0	34	0	45	0	50	0	35	0	25	0	NA	NA	28	0	99	0	34	0	63	0	37	0	NA	NA	57	0	59	0	22	0	58	0	36	0	32	1	45	0	31	0	21	0	69	0	NA
TP288552	TGCAGGCGTCGCCTAAGGCGGACTCATTCTGGTTCACAAAACTGATAGAATTTTACCAGATTGC	TGCAGGCGTCGCCTAAGGCGGACTCATTCTGGTTCACAAAACTAATAGAATTTTACCAGATTGC	33	185	60	75	49	210	72	260	56	155	4	230	14	98	29	134	115	407	0	132	82	285	0	272	24	153	45	87	82	197	94	170	19	238	42	215	0	173	11	175	23	136	16	102	65	202	6
TP289739	TGCAGGCGTTGTTGATCATCAATTTGCTGCTGATCAGCACCACCAGTCACGTGATTAGCATCTT	TGCAGGCGTTGTTGATCATCAATCTGCTGCTGATCAGCACCACCAGTCACGTGATTAGCATCTT	34	36	46	6	13	57	43	81	51	31	54	14	11	20	17	29	91	29	0	53	41	62	12	59	10	21	7	28	29	24	0	58	31	60	28	48	8	69	11	47	26	37	17	15	37	31	32
TP289854	TGCAGGCGTTTTTCGTATATGTCGGTCGTCGTTTGGGCTTTATTCTATTTCCCAACAATCGTCT	TGCAGGCGTTTTTCGTATATGTCGGTCGTCGTTTGGGCTTTATTCTATTTCCCAACAATCGTCG	26	18	22	21	24	18	40	36	30	29	22	27	33	19	26	20	72	72	35	35	48	50	33	40	27	21	18	9	24	26	25	24	39	19	42	51	34	28	33	50	24	15	12	9	32	42	25
TP289894	TGCAGGCTAATAGAGGACACGTAGGGCTATCGAATGATACCAACAATGTTGGATTTGGATGCCA	TGCAGGCTAATAGAGGACACGTAGGGCTATCGAATGATACCAACAATGTTAGATTTGGATGCCA	0	43	0	65	0	52	35	60	0	41	0	48	0	22	NA	NA	0	109	0	37	9	66	0	36	2	28	30	2	35	43	0	46	0	53	19	30	15	26	2	59	0	21	0	25	0	37	0
TP293151	TGCAGGCTGTAGCTTCGGTTTTGTATTGTACAGTGTTTGGTCGATATATATTTAATGCAAAAGG	TGCAGGCTGTAGCGTCGGTTTTGTATTGTACAGTGTTTGGTCGATATATATTTAATGCAAAAGG	182	65	209	75	229	86	237	72	157	88	193	36	92	58	131	77	349	101	165	44	326	68	186	56	143	68	80	36	237	75	127	58	157	24	167	47	143	33	183	44	122	47	128	34	245	80	133
TP293766	TGCAGGCTTCTCCACGGAGAACGAAATTTTGGTGAAAATTTAAAAAATTATTGCCTAACCTTAA	TGCAGGCTTCTCCACGGAGAACGAAATTTTGGTGAAAATTTAAAAAATTATTGCCAAACCTTAA	41	0	69	2	43	0	61	1	48	1	56	2	NA	NA	26	1	100	2	80	6	55	1	42	3	57	1	72	1	40	0	33	1	27	0	60	0	51	0	50	0	44	0	42	3	116	10	32
TP293768	TGCAGGCTTCTCCACGGAGAACGAAATTTTGGTGAAAATTTAAAAATTATTGCCTAACCTTAAC	TGCAGGCTTCTCCACGGAGAACGAAATTTTGGTGAAAATTTAAAAATTATTGCCAAACCTTAAC	203	3	182	26	233	0	285	13	301	5	306	14	148	6	270	3	534	14	345	25	308	16	445	35	262	15	202	4	185	4	279	6	162	0	300	6	189	0	263	0	155	0	135	4	331	25	140
TP293779	TGCAGGCTTCTGAAAAATTAATGAAATGTTTAGCAAAAAATACAAATTGGATAAAATGTAACCG	TGCAGGCTTCTGAAAAATTAATGAAATGTTTAGCAAAAAAGACAAATTGGATAAAATGTAACCG	0	35	2	44	0	31	0	57	4	21	0	46	0	22	0	52	0	98	0	42	0	50	0	41	0	29	3	29	0	48	0	33	0	31	0	91	0	46	0	25	0	23	0	25	0	35	9
TP294225	TGCAGGCTTTTTACATTATTAATTGGCCAAAAAAAGCAAATCGGACAAATCAATACATATAATT	TGCAGGCTTTTTACATTATTAATTGGCCAAAAAAAGCAAATCCGACAAATCAATACATATAATT	12	80	4	112	27	71	30	109	16	82	8	79	7	48	16	41	6	215	2	64	13	138	15	76	17	83	11	55	15	94	49	34	26	79	35	83	14	22	54	49	6	44	18	25	5	86	20
TP294295	TGCAGGGAAAAATGTAAAAATAAAATGGCGGGGAATTAGAAACTGTTTGGTTTAGGCGAGGAAC	TGCAGGGAAAAATGTAAAAATAAAATGGCGGGGAATTAGAAACTGTTCGGTTTAGGCGAGGAAC	0	49	0	82	0	61	18	81	0	56	0	47	0	42	0	60	0	115	0	55	2	84	0	93	0	61	8	49	20	62	0	88	1	52	0	132	2	61	0	72	0	44	0	25	0	87	0
TP294446	TGCAGGGAAATAAAGAAAACGTTTGAATAGTCATAGGGCGAATTATTTGGACCGAAATCGCTTC	TGCAGGGAAATAAAGAAAACGTTTGAATAGTCATAGGACGAATTATTTGGACCGAAATCGCTTC	57	63	31	56	115	60	53	93	72	98	59	47	32	41	68	43	120	134	15	106	38	94	118	79	57	80	27	54	55	87	63	66	36	76	32	109	6	153	0	119	23	40	33	12	53	46	26
TP294929	TGCAGGGACAAAGTGATTCAAAAGCAATCGCCCAATTTGGCAAAGTGTGCAGCGACTGACTGAT	TGCAGGGACAAAGTGATTCAAAAGCAATCGCCGAATTTGGCAAAGTGTGCAGCGACTGACTGAT	0	31	NA	NA	0	42	0	79	0	81	0	37	0	48	0	75	0	0	0	22	0	129	0	42	0	34	14	81	NA	NA	0	43	0	44	11	130	27	37	NA	NA	6	37	NA	NA	0	31	0
TP294939	TGCAGGGACAAGATTTCATGACTATACATAATCTAACTAAAAAATTTGGGTACTTTACGGTTAT	TGCAGGGACAAGATTTCACGACTATACATAATCTAACTAAAAAATTTGGGTACTTTACGGTTAT	0	36	NA	NA	15	16	3	42	7	15	4	23	0	26	5	30	0	42	0	28	4	35	1	41	30	15	9	18	1	26	0	43	0	30	0	54	1	27	0	31	NA	NA	NA	NA	0	24	NA
TP295075	TGCAGGGACCAAAATCCAGCGTTGGCTCAGGCCAACGGAGCGAGGAAATGGCGTGGGATGGGGG	TGCAGGGACCAAAATCCAGCGTTGGCTCAGGCCAACGGAGCGAGGAAATGGCGTGGGATGGGGA	71	0	NA	NA	81	3	190	2	51	0	72	3	66	1	67	0	266	5	89	1	111	2	178	6	118	1	64	1	165	0	89	1	134	1	179	2	118	1	81	0	30	1	76	1	141	0	73
TP296055	TGCAGGGATAACGTACAATTGGGACACATAGCGCGGGGAGGACAATGGAGGGCCGAGGCCATCG	TGCAGGGATAACGTACAATTGGGACACATAGCGCGGGGAGGACAACGGAGGGCCGAGGCCATCG	6	43	16	34	21	61	6	64	4	37	11	41	2	26	9	25	12	126	18	47	11	59	14	62	9	32	2	35	15	58	0	44	14	31	0	46	0	48	0	50	14	47	4	31	4	47	0
TP296254	TGCAGGGATTAACGTTGTGATGGTCACGGGTGAGCTGCCAATTTAGCCAATTGATCAGAGCGTT	TGCAGGGATTAACGTTGTGATGGTCACGGGTGAGCTGCCAATTTAGCCAATTGATCAGAGCATT	32	2	NA	NA	11	26	3	76	4	59	30	47	0	30	13	29	53	63	13	46	11	62	4	63	38	10	6	40	6	71	3	54	0	74	23	28	36	20	15	32	3	54	4	22	15	59	4
TP296338	TGCAGGGATTGAGCAGGAAAAGACCCCTGGGGTGGGGATAAAAGACGATGTACACACATAACGG	TGCAGGGATTGAGCAGGAAAAAACCCCTGGGGTGGGGATAAAAGACGATGTACACACATAACGG	44	0	NA	NA	67	0	53	6	28	0	54	0	NA	NA	45	0	112	0	47	0	40	8	56	0	45	0	22	31	47	6	31	0	38	9	43	12	49	0	33	10	34	1	39	0	65	0	49
TP296524	TGCAGTGCAACAATTTGAGAATACTTGCAGAGGATTTTGCAAATCGTGACTCGTTAGAATATTT	TGCAGGGCAACAATTTGAGAATACTTGCAGAGGATTTTGCAAATCGTGACTCGTTAGAATATTT	0	40	0	20	0	45	5	31	0	23	0	39	0	29	NA	NA	0	64	0	37	7	40	0	40	NA	NA	0	35	23	39	0	25	7	17	8	30	NA	NA	10	14	0	48	NA	NA	0	37	0
TP296638	TGCAGGGCACCGCTGGGGGCCAACCGCACGCGGCGGCACCGCACCAGGTCATACAGAGACTTTA	TGCAGGGCAACGCTGGGGGCCAACCGCACGCGGCGGCACCGCACCAGGTCATACAGAGACTTTA	30	67	12	18	24	55	42	50	20	36	14	34	NA	NA	32	23	7	151	7	13	15	29	17	39	24	28	12	17	25	33	23	32	30	45	61	40	67	1	66	0	13	33	4	25	43	12	24
TP296642	TGCAGGGCACCGCTGGGGGCCAACCGCACGCGCGGCACCGCACCAGGTCATACAGAGACTTTAA	TGCAGGGCAACGCTGGGGGCCAACCGCACGCGCGGCACCGCACCAGGTCATACAGAGACTTTAA	12	45	7	19	13	18	18	43	7	22	9	30	NA	NA	16	13	1	54	NA	NA	6	33	13	24	8	23	NA	NA	21	22	11	16	13	35	22	21	34	0	30	0	7	13	NA	NA	19	13	11
TP298058	TGCAGGGCATCGACCAGCTGATCAGTCGGACGCATTGTGCCGCCGAGCAAAATGAGCGCACGCG	TGCAGGGCATCAACCAGCTGATCAGTCGGACGCATTGTGCCGCCGAGCAAAATGAGCGCACGCG	NA	NA	NA	NA	0	52	0	63	0	33	0	21	0	31	7	20	0	114	0	70	1	62	0	48	3	19	2	29	5	59	12	39	2	22	35	0	14	9	26	12	8	24	NA	NA	0	46	0
TP298196	TGCAGGGCATTCCGCTCATTTGCAAGGAGGGCATGCAGAAGAATGTGCGCTTCGTCGGCGACAG	TGCAGGGCATCCCGCTCATTTGCAAGGAGGGCATGCAGAAGAATGTGCGCTTCGTCGGCGACAG	57	57	5	76	0	119	11	73	8	87	2	101	0	30	10	55	57	182	5	92	0	176	0	97	0	68	0	72	12	102	19	54	3	123	11	87	3	105	24	42	3	40	0	36	9	99	0
TP298818	TGCAGGGCATTCATGTAATTAATTGACCAACGACAATTGATTACAGGAAACCCCAGTTTTACTG	TGCAGGGCATTCATGTAATTAATTGACCAACGACAATTGATAACAGGAAACCCCAGTTTTACTG	60	0	17	32	33	24	68	3	84	2	69	26	14	12	30	0	124	49	89	0	87	26	60	15	49	6	36	0	80	0	53	36	43	5	31	6	55	0	21	0	49	6	36	0	59	11	42
TP298909	TGCAGGGCATTTGCCAATTTACGAATCAAACGGTGGCAGAACCAAATCAGCCAATTAATGTGTA	TGCAGGGCATTTGCCAATTTACGAATCAAACGGTGGAAGAACCAAATCAGCCAATTAATGTGTA	177	0	149	0	88	14	205	19	193	8	130	22	52	9	80	13	206	3	85	39	118	60	162	0	153	0	145	0	95	44	65	9	114	5	148	6	128	6	162	0	171	6	95	0	158	0	72
TP298953	TGCAGGGCCAACCGCCGCCGCCTCAACCGATGGGTCTTCCGCCATCCGCTGGACCACAACAACC	TGCAGGGCCAACCGCCGCCGCCTCAACCGATGGGTCTTCCGCCATCCACTGGACCACAACAACC	22	0	NA	NA	22	0	30	0	NA	NA	30	0	NA	NA	NA	NA	63	0	54	0	25	0	26	0	23	0	NA	NA	37	0	24	0	NA	NA	24	5	27	3	23	2	16	6	32	0	40	0	40
TP306833	TGCAGGGCTCTGGCGGTCAGTTGCGCGTCAACTTCAAAACATTGCAACCGATGGTTTACCAATC	TGCAGGGCTCTGGCGGTCAGTTGCGCGTCAAATTCAAAACATTGCAACCGATGGTTTACCAATC	2	53	5	25	0	49	43	80	6	58	0	39	NA	NA	0	30	0	99	0	54	62	61	0	43	1	20	36	15	18	42	5	61	29	35	9	54	67	26	99	26	0	23	0	37	0	73	0
TP307704	TGCAGGGGAACGCATTGAGCTCGACCCATCGGACAAGGAAAAGCATGACGCGTATAAGAAGTTG	TGCAGGGGAACGCATTGAGCTCGACCCATCGGACAAGGAAAAGCATGACGCGTATAAGAAGCTG	54	6	91	31	55	28	112	28	73	20	82	10	27	6	42	18	178	15	53	2	138	19	39	34	58	26	41	14	56	26	36	8	NA	NA	63	15	51	25	86	17	27	13	27	8	68	24	39
TP307844	TGCAGGGGACTCAAAATGTCGGCGCCCGCTTCGTCCCGCGCTTCAATGGCCTCCTCGCGCACGC	TGCAGGGGACTCAAAATGTCAGCGCCCGCTTCGTCCCGCGCTTCAATGGCCTCCTCGCGCACGC	44	41	6	26	18	88	39	62	12	69	46	34	9	31	31	68	11	161	75	3	72	54	12	42	11	39	24	16	33	51	48	85	14	54	83	16	76	2	78	0	30	47	17	34	23	51	29
TP307906	TGCAGGGGAGGCGGCGCATCAACAGAATGGTGCGGTTGAAGACGCGAAGGGCGACTGATGTCCA	TGCAGGGGAGGCGGCGCACCAACAGAATGGTGCGGTTGAAGACGCGAAGGGCGACTGATGTCCA	142	0	155	6	173	6	346	0	87	3	145	3	77	7	166	0	462	4	142	53	232	10	169	0	150	0	76	3	233	18	135	0	189	23	186	7	192	0	137	0	114	5	94	0	156	0	114
TP308334	TGCAGGGGCCAATCCCATTGTTGGCCGCTCCATTCGTGCGTAATTTCGATATTTTCCATTTTAA	TGCAGGGGCCAATCCCATTGTTGGCCGCTCCATTCGTGCGTAATTTCGATATTTTCCATTTAAA	44	2	51	1	29	3	65	4	72	1	54	0	36	1	33	1	100	3	86	6	61	6	51	3	32	2	42	1	80	2	46	1	58	7	67	4	66	3	55	2	27	3	22	1	95	4	36
TP311782	TGCAGGGTGCGGAAAATTTTGCACGTTTCTGAAACAAAGGGACAAATAATTCATTTTGGAATTC	TGCAGGGTGCGGAAAATTGTGCACGTTTCTGAAACAAAGGGACAAATAATTCATTTTGGAATTC	0	24	0	30	0	32	7	56	0	41	0	53	0	24	0	39	0	74	0	46	21	48	0	43	0	43	2	29	16	46	0	24	NA	NA	0	47	0	33	0	44	NA	NA	0	20	0	39	0
TP313097	TGCAGGGTTTTAGGAGTCGTTGAGCGCGAATCTGACCTGTATTTCGACCAATTCCGAGTTCCTT	TGCAGGGTTTTAGGAGTCGTTGAGCGCGAATCTGACCTGTATTTCGACCAATTACGAGTTCCTT	29	0	34	3	38	0	NA	NA	28	5	56	7	34	0	NA	NA	68	24	NA	NA	21	24	NA	NA	NA	NA	NA	NA	13	12	NA	NA	21	5	NA	NA	38	0	42	3	NA	NA	23	3	19	15	17
TP313299	TGCAGGTAAATAAAATCACAAATTCGCAATTGTTAAGTTTGAGAATCCTCAGTTGGAGGGATGG	TGCAGGTAAATAAAATCACAAATTCGCAATTGTTAAGTTTGAGAATCCTCAGCTGGAGGGATGG	40	0	64	20	14	15	66	12	37	4	52	15	20	0	23	8	74	50	51	14	55	3	32	5	21	11	42	0	48	2	13	14	40	19	51	0	53	0	44	0	20	9	23	5	47	7	23
TP313326	TGCAGGTAAATGTCCACGTATTGGGCACCGATGTTGCCAGCTGAACAGAAAAAAGCTCATTCAG	TGCAGGTAAATGTCCACGTATTGGGCACCGATGTTACCAGCTGAACAGAAAAAAGCTCATTCAG	49	0	78	0	63	0	76	0	72	0	33	0	25	1	38	0	106	0	37	1	77	0	36	0	36	0	49	0	75	0	27	0	48	0	70	0	55	0	58	0	34	0	61	0	61	0	NA
TP313327	TGCAGGTAAATGTCCACGTATTGGGCACCGATGTTGCCAGCTGAACAGAAAAAGCTCATTCAGA	TGCAGGTAAATGTCCACGTATTGGGCACCGATGTTACCAGCTGAACAGAAAAAGCTCATTCAGA	70	1	45	0	47	0	58	0	33	0	50	0	25	0	30	0	110	0	43	0	76	0	73	0	37	0	37	1	47	1	41	0	58	0	74	0	34	0	63	0	31	0	46	0	36	0	23
TP313371	TGCAGGTAACCAGCTTCATAATTGTCGCATTTTCCACTTCTTTCTCTGTCGGATTGCTTGGTTC	TGCAGGTAACCAGCTTCATAATTGTCGCATTTTCCACTTCTTTCTCCGTCGGATTGCTTGGTTC	0	36	0	69	0	43	0	73	0	38	0	42	0	23	NA	NA	0	119	0	55	0	66	0	36	0	31	NA	NA	0	69	0	41	NA	NA	0	51	0	49	0	46	NA	NA	0	22	4	40	0
TP316916	TGCAGGTAGTTAATGGGGGAGGGGCGGAATTTTTGTCCAGGAAACCGAACTCAAATTTTGCTTT	TGCAGGTAGTTAATGGGGGAGGGGCGGAATTTTTGTCCAGGAAACCAAACTCAAATTTTGCTTT	NA	NA	26	0	41	0	50	7	22	0	36	0	22	1	23	0	77	0	25	0	35	9	NA	NA	NA	NA	NA	NA	30	3	23	2	65	0	26	5	24	23	22	5	NA	NA	25	0	38	0	NA
TP316919	TGCAGGTAGTTAATGGGGGGAGGGGCGGAATTTTGTCCAGGAAACCGAACTCAAATTTTGCTTT	TGCAGGTAGTTAATGGGGGGAGGGGCGGAATTTTGTCAAGGAAACCGAACTCAAATTTTGCTTT	54	0	48	0	78	0	81	7	37	3	44	0	45	0	42	0	155	0	44	0	56	29	45	0	43	1	33	7	75	15	67	6	55	0	86	7	NA	NA	18	6	26	5	49	0	88	0	25
TP317259	TGCAGGTATGGTGGGATGGATGTGTTTTCATTTGGCTGTGGTTCTTTAAATAGCTCTGAATTTG	TGCAGGTATGGTGGGATGGATGTGTTTTCATTTGGCTGTGGTTCTTTAAATAGCTCTGAATTGG	155	2	102	5	145	2	124	1	106	4	83	2	64	1	60	0	184	1	54	1	138	2	58	0	58	0	34	1	188	4	82	1	71	1	39	0	NA	NA	0	0	73	0	49	0	86	2	56
TP317622	TGCAGGTCAACATGATCAGCGCTTATTGTCGAGATCCGTCTTGCGCCAATCAAATGCTGTCGCC	TGCAGGTCAACATGATCAGCGCTTATTGTCGAGATCCGTCTTGCGCCAATCAAATGCTGCCGCC	16	6	118	18	0	85	31	89	14	64	53	30	0	0	15	38	20	156	0	32	12	77	54	56	34	7	30	0	6	19	33	31	97	35	28	23	64	16	77	4	21	17	21	45	10	128	23
TP318071	TGCAGGTCACACGCTTGCTGCTCTGCCTGGGCGCCGACCCGAACGTGACCAATGCGCACGGGGG	TGCAGGTCACACGCTTGCTGCTCTGCCTGGGCGCCGACCCGAACGTGACCAATGCGCACGGGGA	2	164	6	257	4	179	4	244	7	222	4	253	3	154	2	211	18	653	7	181	9	406	10	327	6	161	5	155	2	163	4	149	6	254	2	224	4	121	3	186	1	115	5	144	3	225	3
TP319756	TGCAGGTCCATAGGGCCAGTCGCTGTACGGGTTCGTCGGCTGGTGCGGAAGAGGATCAAGATAC	TGCAGGTCCATAGGGCCAGTCGCTGTACGGGTTCGTCGGCTGGTGCGGAAGAGGATCAAAATAC	0	77	0	88	0	152	71	54	0	73	0	64	14	72	0	42	0	256	0	105	10	106	0	136	10	96	11	61	70	48	0	84	11	66	74	94	31	51	50	38	6	52	0	35	6	82	0
TP324827	TGCAGGTCGCTGAGTGCTTGTCCGTCCTGGGCAATGATCTGCCCATAGCGCTTGATCAAACGTC	TGCAGGTCGCTGAGTGCTTGTCCGTCCTGGGCAATGATCTGCCCATAGCGCTTGACCAAACGTC	0	29	1	55	0	34	0	55	0	34	0	23	NA	NA	NA	NA	0	62	0	24	5	85	0	27	0	30	8	15	0	21	4	38	12	30	54	18	42	21	26	23	2	20	0	24	0	25	NA
TP325253	TGCAGGTCGGCCCAATACTTTTGATGAAGTGATTTTTGTATTGATGCTGTTGGATTACAATTGT	TGCAGGTCGGCCCAATACTTTTGATGAAGTGATTTTTGTATTGATGCTGTTGGATTACAATTGG	0	80	0	106	0	64	0	101	0	71	0	63	0	43	0	34	1	111	0	24	0	101	0	67	0	35	0	51	0	129	0	53	0	63	0	72	1	59	0	87	1	23	0	27	0	99	0
TP328414	TGCAGGTCTTTTTCCGTGGATTTCTTTATTTTCCATACAAACCCTTACATTTTTCTTTTTGCCA	TGCAGGTCTTTTTCCGTGGATTCCTTTATTTTCCATACAAACCCTTACATTTTTCTTTTTGCCA	79	0	110	0	102	0	110	0	101	9	100	0	42	0	87	0	208	0	10	70	83	0	86	0	60	5	38	4	85	0	83	0	64	23	71	25	NA	NA	3	35	39	9	55	0	106	0	79
TP328804	TGCAGGTGAATCAACTGGCTTCACATGCCGTACCGTGAAAATACAACTTCGTTTTGCAGACCTT	TGCAGGTGAATCAACTGGATTCACATGCCGTACCGTGAAAATACAACTTCGTTTTGCAGACCTT	11	26	13	53	11	14	14	28	NA	NA	27	0	NA	NA	14	6	73	36	12	20	7	48	29	33	NA	NA	NA	NA	7	32	42	6	30	15	22	10	NA	NA	40	0	18	4	5	20	13	52	11
TP329425	TGCAGGTGAGTCCCGAGTGACTCCTTGTGCACGACTCGGTCTGAGTGATCACGGAAATGGTTTC	TGCAGGTGAGTCCCGAGTGACTCCTTGTGCACGACTCGGTCCGAGTGATCACGGAAATGGTTTC	97	106	123	122	63	98	140	185	212	124	145	74	47	62	66	84	639	306	140	149	289	50	128	190	103	57	37	41	137	132	53	127	56	204	98	142	142	18	103	45	31	157	49	7	122	78	65
TP330591	TGCAGGTGCAGCTGATTCTGCGGTCTCCTCTGTCGTTTATTCCAATGAAAATTTGACCTTTGTA	TGCAGGTGCAGCTGATTCTGCGGTCTCCTCTGTCGTTTATTCCAATGAAAATTCGACCTTTGTA	48	96	20	261	0	149	5	282	5	246	0	192	0	90	0	149	152	160	0	149	35	250	0	228	0	173	0	145	0	302	0	148	0	168	0	221	0	183	0	200	9	130	4	69	10	156	0
TP330824	TGCAGGTGCATATTACACAGGCTTAATGGTAGAAGCTTCAAACAAAGTTTAGAACATTTTAAGT	TGCAGGTGCATATTACACAGGCTTAATGGTAGAAGCTTCAAACAAAGTTTAGAACATTTTAAGG	2	34	1	53	2	57	2	44	1	62	0	45	4	16	1	20	0	87	1	21	1	68	1	55	0	34	1	40	0	32	0	43	1	67	0	35	0	27	NA	NA	NA	NA	0	23	1	57	2
TP330997	TGCAGGTGCCATTCGTGCACGTGATGAGAAGCGAACGAGGGCCATTGCCCGCGAGTTTGAAGTG	TGCAGGTGCCATTCGTGCACGCGATGAGAAGCGAACGAGGGCCATTGCCCGCGAGTTTGAAGTG	0	57	0	62	0	62	0	104	0	35	0	45	0	22	NA	NA	0	74	0	61	0	80	0	54	0	45	0	34	0	72	0	45	0	23	0	50	5	26	0	77	0	22	0	33	0	69	0
TP331296	TGCAGGTGCCGCGGGCTTTTCCTCGGCTTTGCCTTTTGTTTCTTCATTTCTTCCTCCTTTTCTT	TGCAGGTGCCGCGAGCTTTTCCTCGGCTTTGCCTTTTGTTTCTTCATTTCTTCCTCCTTTTCTT	32	0	40	0	39	1	57	0	51	0	40	0	20	0	32	0	69	0	30	1	40	0	60	0	34	0	25	1	35	1	26	1	48	0	48	0	40	1	37	0	NA	NA	23	0	34	1	25
TP331297	TGCAGGTGCCGCGGGCTTTTCCTCGGCTTTGCCTTTTGTTTCTTCATTTCTTCCTCCTTTTTCT	TGCAGGTGCCGCGAGCTTTTCCTCGGCTTTGCCTTTTGTTTCTTCATTTCTTCCTCCTTTTTCT	113	1	151	1	141	0	177	2	159	5	126	2	81	2	106	4	257	2	125	1	141	0	176	1	105	0	119	0	154	2	105	1	121	3	148	2	157	3	156	4	88	0	73	0	141	1	80
TP331377	TGCAGGTGCCGCGGCTTTTCTTCGGGCTTTGCCTTTTGTTTCTTCATTTCTTCCTCCTTTTTCT	TGCAGGTGCCGCGGCTTTTCCTCGGGCTTTGCCTTTTGTTTCTTCATTTCTTCCTCCTTTTTCT	0	88	0	129	0	132	2	211	3	155	0	105	0	79	1	110	1	204	0	114	0	119	1	178	0	90	1	74	3	176	1	110	4	102	0	137	1	167	0	151	1	51	0	73	6	132	0
TP331416	TGCAGGTGCCGCGGGCTTTCTTCGGGCTTTGCCTTTTGTTTCTTCATTTCTTCCTCCTTTTCTT	TGCAGGTGCCGCGGGCTTTCCTCGGGCTTTGCCTTTTGTTTCTTCATTTCTTCCTCCTTTTCTT	2	78	2	65	0	87	1	129	3	94	2	51	1	58	2	40	4	97	2	89	1	58	4	168	1	49	1	62	4	80	0	71	1	82	1	102	1	74	3	71	1	36	0	30	0	33	1
TP331417	TGCAGGTGCCGCGGGCTTTCTTCGGGCTTTGCCTTTTGTTTCTTCATTTCTTCCTCCTTTTTCT	TGCAGGTGCCGCGGGCTTTCCTCGGGCTTTGCCTTTTGTTTCTTCATTTCTTCCTCCTTTTTCT	3	165	2	163	3	143	3	220	4	158	1	161	5	93	2	81	5	264	3	204	1	96	5	262	0	87	8	135	5	167	2	129	2	149	5	254	4	134	6	176	6	83	0	50	5	107	0
TP331449	TGCAGGTGCCGCGGGCTTTTCCTCGGGCTTTGCCTTTTGTTTCTTCATTTCTTCCTCTTTTTCT	TGCAGGTGCCGCGGGCTTTTCCTCGGGCTTTGCCTTTTGTTTCTTCATTTCTTCCTCCTTTTCT	5	1182	70	1497	45	1518	39	2622	40	1993	25	1696	12	1142	27	1503	77	1975	13	1092	48	1372	41	1976	23	937	1	818	15	1787	53	1602	45	1752	10	1853	8	1278	6	1609	13	601	10	913	10	1339	20
TP331554	TGCAGGTGCCGTTGTTGTGGTGAAGGGACAGTGAGTCGTCGGAGTTGTTTATGCGCGACTGTGT	TGCAGGTGCCGTTGTTGTGGTGAAGGGACAGTGAATCGTCGGAGTTGTTTATGCGCGACTGTGT	61	0	138	0	79	3	149	15	89	13	62	2	44	0	21	17	281	0	76	0	169	0	76	7	70	8	56	10	97	11	60	5	88	11	139	24	84	1	103	12	52	7	50	26	96	13	48
TP333577	TGCAGGTGCTGTCCATAATCACTGAGTTGTGTCGTCATGACACCTGCTTGCGTGGCGAATGTCG	TGCAGGTGCTGTCCATAATCACTGAGCTGTGTCGTCATGACACCTGCTTGCGTGGCGAATGTCG	18	8	30	0	44	8	19	50	29	7	44	0	21	1	NA	NA	103	1	2	65	31	21	42	6	22	0	5	18	28	43	24	0	23	5	7	29	15	29	0	23	22	0	NA	NA	33	26	22
TP333913	TGCAGGTGGACAAAACGAGAACGGACGGCACAAATGTGGACGGAATTGGCACCGAAGTGATCAC	TGCAGGTGGACAAAACGAGAACAGACGGCACAAATGTGGACGGAATTGGCACCGAAGTGATCAC	NA	NA	44	0	71	0	102	0	30	0	NA	NA	43	0	43	0	150	0	52	0	44	0	47	0	46	1	40	0	22	0	28	0	43	0	33	55	36	20	9	35	29	0	20	0	59	0	25
TP334136	TGCAGGTGGAGCCGACTTACAGGTGGGGCAATGACGAAGAGGTTGACGGTTGGTCAGCGGCACG	TGCAGGTGGAGCCGACTTACAGGTGGGGCAATGACGAAGAGATTGACGGTTGGTCAGCGGCACG	0	46	21	50	0	92	11	76	0	77	8	63	0	27	9	57	56	112	0	77	11	109	2	78	0	77	23	22	4	62	10	48	2	43	5	78	1	60	0	59	17	52	2	37	19	74	1
TP334479	TGCAGGTGGCCAAGGATGGGTCGCCAAATTCGGCAATGCGCTCTTGCTGGAATGAAATAGGGTT	TGCAGGTGGCCAAGGATGGGTCGCCAAATTCGGCAATGCGCTCTTGCTGGAATGAAATAGGGGT	NA	NA	1	50	0	24	0	45	1	40	0	20	NA	NA	1	21	0	73	1	35	2	31	0	40	0	23	1	27	0	58	1	20	0	26	0	41	0	29	0	24	1	39	0	28	1	38	NA
TP334793	TGCAGGTGGCGAAGTGGTTGTAGACAGTCAGCGTAATTACTTTGTTGAGTGACATTATATTTGA	TGCAGGTGGCGAAGTGGTTGTAGACAGTCAGCGCAATTACTTTGTTGAGTGACATTATATTTGA	30	0	42	17	36	0	33	24	45	5	37	0	23	0	34	5	74	1	22	0	42	46	45	1	27	13	17	7	44	23	33	7	22	2	23	38	NA	NA	3	34	NA	NA	21	5	42	49	NA
TP335396	TGCAGGTGGGCGAAGTGGTGACGACAATTCCGACCATTGGCTTTAATGTGGAGCAGGTCATTCA	TGCAGGTGGGCGAAGTGGTGACGACAATTCCGACCATTGGCTTTAACGTGGAGCAGGTCATTCA	165	26	135	51	139	55	87	147	70	45	189	31	74	27	124	35	186	76	165	28	110	121	102	67	78	14	45	32	82	139	79	102	173	60	225	51	235	0	154	2	56	37	79	17	143	38	106
TP335432	TGCAGGTGGGCGAGAGGAGAGGGATAAAAGGCAATAAGTAAAGGAATTAATTGATAATTAACGG	TGCAGGTGGGCGAGAGGAGAGGGACAAAAGGCAATAAGTAAAGGAATTAATTGATAATTAACGG	9	100	13	200	65	72	42	149	2	115	0	143	7	80	0	104	0	256	25	97	46	128	5	101	35	74	37	27	12	114	6	111	14	95	51	129	75	89	83	77	27	60	9	51	45	110	0
TP335747	TGCAGGTGGTGTCAATGCCGAGAGTTAATTTCATTTTGTCTGTTCCAAAATTTCCTTATTACTC	TGCAGGTGGTATCAATGCCGAGAGTTAATTTCATTTTGTCTGTTCCAAAATTTCCTTATTACTC	675	1	282	2	441	3	504	5	680	5	734	2	269	1	372	2	1010	15	189	0	469	2	755	10	420	1	145	1	473	3	714	11	684	2	184	3	59	2	21	0	185	0	247	4	790	10	367
TP335985	TGCAGGTGGTCTTCTCCCCTCCCCCGCCTCCTACTCCTTTAGCATTACTCAGAAACTGTGGCCA	TGCAGGTGGTCTTCTCCCCTCCCCCGCCTCCTACCCCTTTAGCATTACTCAGAAACTGTGGCCA	0	55	0	32	0	77	0	67	16	24	9	49	NA	NA	13	21	0	121	0	43	0	21	0	49	3	37	0	59	0	51	0	33	4	22	0	52	9	50	0	34	2	54	0	21	0	37	0
TP336315	TGCAGGTGGTGTCAATGCCGAGAGTTAATTTCGTTTTTGTCTGTTCCAAAATTTCCTTATTACT	TGCAGGTGGTGTCAATGCCGAGAGTTAATTTAGTTTTTGTCTGTTCCAAAATTTCCTTATTACT	523	216	273	124	361	133	362	242	559	347	595	359	212	108	174	97	968	429	191	61	405	213	546	318	294	248	80	43	369	218	636	378	601	372	197	122	45	30	11	25	183	132	227	127	741	390	219
TP336612	TGCAGGTGTATGTCAGAGTTTGACTCTTTTCTTAAGTGGACTTTGCCGATCGTGCGAAATTCCG	TGCAGGTGTATGTCAAAGTTTGACTCTTTTCTTAAGTGGACTTTGCCGATCGTGCGAAATTCCG	260	0	509	0	323	0	621	23	395	2	393	5	149	6	275	3	942	4	317	27	512	19	293	3	261	3	380	15	420	4	328	5	302	1	639	3	421	9	437	10	303	2	173	3	223	1	128
TP339512	TGCAGGTTCTTCACGTGTGTGCTCAGTGCCTGCTTCTCGCGCTGTTCCTCCGTTGCGGCACGCT	TGCAGGTTCTTCACGTGCGTGCTCAGTGCCTGCTTCTCGCGCTGTTCCTCCGTTGCGGCACGCT	3	21	9	44	34	52	51	39	31	28	36	24	28	17	52	13	92	101	52	31	67	19	49	7	12	39	28	7	77	13	1	68	23	41	26	58	37	19	39	25	30	58	15	9	46	29	19
TP339794	TGCAGGTTGAATATCAGCCTGGGAAGAAGAATGTGATCGCCGATCTCTTGTCACGCTCACCAGC	TGCAGGTTGAATATCAGCCTGGGAAGAAGAATGTGATCGCCGACCTCTTGTCACGCTCACCAGC	60	6	102	98	58	13	60	48	55	10	54	2	56	20	49	0	148	17	122	24	140	30	24	14	29	1	93	13	51	54	39	15	60	51	152	31	115	13	123	5	26	9	38	22	97	8	29
TP340613	TGCAGGTTGCGCCTGGACACCGCAAAATGCAGTGCCGTCATTTTGTCACTGTCGTCCGCCTGCT	TGCAGGTTGCGCCTGGACACCGCAAAATGCAGTGCCGTCATTTTGTCACTGTCGTCAGCCTGCT	50	3	40	7	84	14	58	11	32	8	39	4	19	9	29	4	132	14	60	11	30	39	42	1	34	8	29	3	45	20	NA	NA	41	6	72	6	25	0	31	0	37	23	18	6	45	7	31
TP341171	TGCAGGTTGGCGCGAACTAGAACACGGATGCTGGTGAACGTGCTGCTCCAAGTCGTCCGAATCG	TGCAGGTTGGCGCGAACTAGAACACGGATGCTGCTGAACGTGCTGCTCCAAGTCGTCCGAATCG	NA	NA	0	28	0	22	2	44	0	35	7	31	NA	NA	NA	NA	0	96	7	34	0	71	0	54	0	29	0	38	11	30	1	32	0	35	0	58	0	31	0	20	0	36	NA	NA	0	40	NA
TP342496	TGCAGGTTTTCTTGGATTTTAAATTTGGGAAAAGACCAAATTTCGGCTTTTGTTTTTTGACTTC	TGCAGGTTTTCTTGGATTTTAAATTTGGGAAAAGACCAAATTTCGGCTTTTGTTTTTCGACTTC	0	33	12	79	0	70	0	65	0	32	0	59	0	44	0	34	3	116	0	68	0	48	0	59	0	48	0	33	0	41	0	27	0	64	0	48	0	26	0	23	0	47	0	38	0	51	NA
TP342602	TGCAGTAAAAATTTTGGCAAATTTCGCCCTGCCTTTCACACACCGACTGTCCTGGCCACGGAAA	TGCAGTAAAAATTTTGGCAAATTTCGCCCTGCCTTTCACACACCGACTGTCCTGGCCACGAAAA	29	0	77	0	72	0	69	0	36	1	24	0	26	0	NA	NA	45	0	NA	NA	57	0	41	0	45	0	54	0	63	0	34	0	47	0	78	1	39	0	66	0	31	0	28	0	49	0	NA
TP343003	TGCAGTAAGCCTCGGCGAGTGCGACGGCGTCGTCAATGGCAAAATGGTCCAAACTTGTCTCAAT	TGCAGTAAGCCTCGGCGAGTGCAACGGCGTCGTCAATGGCAAAATGGTCCAAACTTGTCTCAAT	62	16	79	16	36	53	115	14	72	13	30	49	39	19	33	9	111	107	61	0	88	47	71	42	45	17	55	46	93	23	69	9	54	31	30	53	21	23	50	49	29	22	53	2	62	25	27
TP343194	TGCAGTAATCAACATTCGATTTTTCCATTTTCAAGATGTATACAATCACCCCTTTAAAAAACGT	TGCAGTAATCAACATTCGATTTTTCCATTTTCTAGATGTATACAATCACCCCTTTAAAAAACGT	2	72	1	74	7	87	3	130	3	54	1	55	8	31	2	25	0	100	4	87	11	198	7	85	7	42	3	55	3	54	4	87	2	67	5	116	1	111	0	73	8	48	5	37	6	106	2
TP343195	TGCAGTAATCAACATTCGATTTTTCCATTTTCAAGATGTATACAATCACCCTTAAAAACGTCGA	TGCAGTAATCAACATTCGATTTTTCCATTTTCTAGATGTATACAATCACCCTTAAAAACGTCGA	3	79	1	91	8	98	2	138	7	92	2	95	3	53	0	38	1	143	5	121	15	239	9	127	10	57	3	78	3	122	5	101	8	101	3	148	0	122	1	94	1	37	2	45	2	87	1
TP343274	TGCAGTAATGGGCCCGCTGCTGCTGCACAACCTACACCAACAAAAGCAACAGCAAAAACTGTGC	TGCAGTAATGGGCCCGCTGCTGCTGCACAACCTACACCAACAAAAACAACAGCAAAAACTGTGC	73	45	4	72	59	43	26	100	13	67	7	37	40	25	36	9	208	50	71	41	109	57	0	62	4	46	32	5	26	60	4	77	25	39	54	34	34	58	85	0	14	28	8	18	37	39	10
TP343323	TGCAGTAATTTAAGCGCTGAATAGAATCTGACAGGAGCTAAAAAATGACCAAATCACCAAGGAA	TGCAGTAATTTAAGCGCTGAATAGAATCTGACAGGAGCTAAAAAAGGACCAAATCACCAAGGAA	42	8	43	0	84	1	73	0	52	0	65	0	NA	NA	34	0	129	0	34	0	32	0	62	0	36	1	38	0	47	1	50	0	68	0	47	9	NA	NA	20	0	NA	NA	47	0	41	0	21
TP343508	TGCAGTACACGGGAACAGCATCCGCTTTCAATTCGAGATGGGTAGTCGGGGACCTCCAATTTGA	TGCAGTACACAGGAACAGCATCCGCTTTCAATTCGAGATGGGTAGTCGGGGACCTCCAATTTGA	53	25	41	0	43	11	21	60	20	4	29	0	5	21	2	22	119	9	29	42	34	55	51	4	25	23	NA	NA	31	20	NA	NA	45	7	20	25	11	20	33	5	26	8	24	2	9	24	NA
TP343690	TGCAGTACAGATCGACTGAAATTTTCGAAATTTTCCATCCTGGCTCGGCTTCTTGGCTTATTGC	TGCAGTACAGATCGACAGAAATTTTCGAAATTTTCCATCCTGGCTCGGCTTCTTGGCTTATTGC	3	262	0	652	10	370	9	593	0	361	30	435	10	199	9	298	42	788	0	366	0	794	0	508	0	339	2	222	1	589	2	395	0	460	5	520	13	550	5	473	0	244	1	202	14	547	4
TP344072	TGCAGTACCAGCAGCAGTCTTACGTGACATAGAGCAGCGGAAACGACAAGCCATTGACTATGCG	TGCAGTACCAGCAGCAGTCTTACGTGACACAGAGCAGCGGAAACGACAAGCCATTGACTATGCG	0	21	0	65	0	56	0	53	0	46	0	66	0	22	10	29	0	131	NA	NA	1	101	0	64	NA	NA	3	59	0	55	0	47	0	43	6	170	7	70	20	69	11	37	0	52	0	59	0
TP345830	TGCAGTACTACGAGGCGGAGTTGGCCGAGTTGGTCTGCTCGTGCACCGCCGTTGTGTGCTGTCG	TGCAGTACTACGAGGCGGAGTTGGCCGAGTTGGTCTGCTCGTGCACCGCCGTCGTGTGCTGTCG	21	0	45	0	21	0	68	0	56	0	30	0	21	0	NA	NA	55	0	28	0	54	4	23	0	24	0	33	14	30	0	22	0	28	0	25	3	27	0	19	26	NA	NA	NA	NA	28	0	22
TP346023	TGCAGTACTCTGCTCAGAAATGCACTCGTTCAGCTGCTCGTTGGTCTCGCGCAATGCGCCAATT	TGCAGTACTCTGCTCAGAAATGCACTCGTTCAGCTGCTCGTTGGCCTCGCGCAATGCGCCAATT	31	41	86	13	15	70	112	11	18	50	37	13	15	16	10	29	60	57	18	59	61	41	26	40	17	31	23	22	65	11	5	37	21	37	51	55	48	26	33	42	NA	NA	15	25	49	71	2
TP346394	TGCAGTAGAGCCAAATTAAATTGCAATGTTTTTTTGCTCTCAACCCTTCAACAAACCATAGATT	TGCAGTAGAGCCAAATTAAATTGAAATGTTTTTTTGCTCTCAACCCTTCAACAAACCATAGATT	14	26	79	15	53	27	37	39	70	7	72	4	20	19	32	3	150	11	41	18	65	53	44	32	45	1	16	25	43	46	36	32	9	47	34	78	5	73	0	60	13	41	30	1	65	11	28
TP346570	TGCAGTAGCATATGTTGTTGGCACATTCGCTGTTTGTGAATTTGCAATGTTCTGCCAATGTGCA	TGCAGTAGCATATGTTGTTGGCACATTCGCTGTTTGCGAATTTGCAATGTTCTGCCAATGTGCA	37	0	59	5	39	0	83	30	55	6	44	0	NA	NA	22	0	77	0	44	0	70	8	58	0	29	0	39	3	32	7	42	0	48	0	92	0	51	21	25	30	38	0	24	0	49	0	33
TP346852	TGCAGTAGGAGAAAACGTATTGAGGAATAATAGGTGTCTGAAGTCCAAGCCTCTGGACTTACTG	TGCAGTAGGAGAAAACGTATTGAGGAATAATAGGTGTCAGAAGTCCAAGCCTCTGGACTTACTG	42	98	86	110	2	24	284	86	157	78	77	59	74	21	86	56	463	143	105	31	93	112	240	35	54	60	25	74	367	63	2	19	93	127	40	134	43	78	17	66	73	46	94	72	37	49	37
TP347283	TGCAGTATCAATATCCTCGACATTTTACCCCTGCACGCGCCCCGATGAGTCTTGAGGTGATGAT	TGCAGTATCAATATCCTAGACATTTTACCCCTGCACGCGCCCCGATGAGTCTTGAGGTGATGAT	0	64	4	107	0	63	0	111	0	102	0	83	0	57	0	46	0	160	0	58	0	69	0	87	0	38	0	63	0	118	0	48	18	54	70	50	10	33	17	51	0	39	0	42	0	85	0
TP347689	TGCAGTATGACAATGAGTTGCGACCTGAACACAATGCCCAACAGATTTCCGTAGTTGGGGAATT	TGCAGTATGACAATGAGTTGCGACCTGAACACAATGCCCAACAAATTTCCGTAGTTGGGGAATT	1	36	5	60	2	108	41	53	6	47	4	52	0	22	0	34	0	93	10	34	18	88	0	21	1	34	15	27	13	50	0	47	0	33	7	33	27	35	31	29	NA	NA	0	29	0	45	4
TP347957	TGCAGTATTACCGCATTGGAAATATTGCAAAAAGAAAATTCGTGGTCAGTGCGGAACTTGGTTT	TGCAGTATTACCGCAATGGAAATATTGCAAAAAGAAAATTCGTGGTCAGTGCGGAACTTGGTTT	0	40	0	31	4	47	0	51	0	33	1	25	NA	NA	0	28	0	61	NA	NA	5	42	0	24	0	32	NA	NA	0	22	0	26	0	25	9	14	8	13	8	22	NA	NA	NA	NA	0	30	NA
TP347980	TGCAGTATTACGAGGCGGAGTTGGCCGAGTTGGTCTGCTCGTGCACCGCTGTTGTGTGCTGTTG	TGCAGTATTACGAGGCGGAGTTGGCCGAGTTGGTCTGCTCGTGCACCGCTGTTGTGTGCTGTCG	85	13	165	46	130	3	144	30	71	24	149	29	92	3	115	10	371	4	143	45	221	61	130	24	73	0	66	10	175	27	95	0	164	28	81	19	86	7	29	1	93	21	72	13	88	3	89
TP348283	TGCAGTCAAACAACAAAAATGAAGACAACAACCTTTGTTTCAAGCACATTTTCGAACTTCATTT	TGCAGTCAAACAACAAAAATGAAGACAACAACCTTTGTTTCAAGCACATTTTCGAACTTCATTG	28	1	49	2	47	0	65	0	28	0	48	0	32	0	29	0	69	0	37	0	45	1	46	0	31	1	NA	NA	47	0	23	0	41	0	53	1	32	0	43	2	36	0	20	1	60	1	25
TP348385	TGCAGTCAACGCACTGCTTGTTCAGGACGACATTTCACAGGCCGTCAAACTTCAGTTTGGCGTT	TGCAGTCAACGCACTGCTTGTTCAGGACGACATTTCACAGGCCGTCAAACTTCAGTTGGGCGTT	485	0	746	0	513	0	524	203	419	27	370	0	236	0	378	0	971	0	358	0	601	104	405	0	387	13	198	31	401	123	478	7	389	0	596	164	344	37	279	19	287	0	203	0	432	0	286
TP348437	TGCAGTCAAGAAGTAATCATATTATGGCTTCTTGGAATTCTGGTGTTGTTCAACTGTCCATCCC	TGCAGTCAAGAAGTAATCATATTATGGCTTCTTGGAATTCTGGTGTTGTTCAACTGTCCATCCA	67	4	82	2	67	2	173	4	84	3	87	0	36	0	69	1	180	2	68	2	84	3	65	1	60	1	50	1	77	4	76	2	89	1	55	1	86	0	80	3	52	1	52	2	117	3	40
TP348551	TGCAGTCAATTGGTGCTTTTTTCTCTTCCGAAGCCGCCTTTCTTTGAGGACGAAGTGGACGACT	TGCAGTCAATTGGTGCTTTTTTCTCTTCCGAAGCCGCCTTTCTTTGAGGACGAAGTCGACGACT	59	53	45	61	28	73	71	90	53	46	44	76	14	17	25	30	100	93	67	45	103	58	53	64	48	26	27	42	70	67	24	42	44	46	88	72	50	66	29	59	43	24	27	29	73	68	26
TP348835	TGCAGTCGCTGCGCGTGGTGGACGCGAGTGCGGCGGTGTTGGCGCCCGAGGGTTGGGACGCGGA	TGCAGTCACTGCGCGTGGTGGACGCGAGTGCGGCGGTGTTGGCGCCCGAGGGTTGGGACGCGGA	NA	NA	39	0	30	0	NA	NA	21	0	28	0	25	0	NA	NA	65	0	66	0	29	0	34	0	30	0	33	13	49	0	NA	NA	40	15	46	5	28	0	30	12	30	1	NA	NA	39	0	NA
TP348985	TGCAGTCAGCCATCGACGCGCTGACGGAGGAAGTTTGTGCCCTCCGTCGGGCAATCCCCCCTGT	TGCAGTCAGCCATCGACGCGCTGACGGAGGAAGTTTGTGCCATCCGTCGGGCAATCCCCCCTGT	19	32	3	59	8	67	7	21	4	63	15	27	1	19	8	53	50	119	17	25	30	42	35	64	5	58	NA	NA	NA	NA	NA	NA	7	31	5	37	2	25	NA	NA	13	22	6	22	6	16	4
TP349044	TGCAGTCAGCGCTCGTCCAACACGGCACACAAATTTCAGAACCGATCATTTCACACGGTCGTGG	TGCAGTCAGCGCTCGTCCAACACGGCACACAAATTTCAGAACCGATCATTTCACACGGTCGTGC	49	4	74	7	57	1	57	4	40	0	45	3	22	0	NA	NA	108	11	51	3	78	3	35	3	26	3	18	4	41	1	62	2	22	2	39	0	37	6	NA	NA	29	2	25	0	43	2	28
TP349167	TGCAGTCAGGCTGCTTCGAACCCATGTTCCCCGATGAGAAAAACGGGAATTTAACCTGTGATTG	TGCAGTCAGGCTGCTTCGAACCCATGTTCCCCGATGAAAAAAACGGGAATTTAACCTGTGATTG	45	33	29	0	16	11	76	13	74	6	78	51	NA	NA	23	10	130	40	66	4	104	4	59	0	20	39	25	0	47	9	53	0	48	23	8	19	NA	NA	0	0	56	8	69	15	143	0	42
TP349231	TGCAGTCAGTCGCCCCCTCAGAAGACCTTCATCATGTGCAATTTCCTCGACTCTGATCACCACC	TGCAGTCAGTCGCCCCCCCAGAAGACCTTCATCATGTGCAATTTCCTCGACTCTGATCACCACC	21	4	NA	NA	8	25	19	29	NA	NA	6	16	NA	NA	NA	NA	3	99	20	7	13	21	21	13	1	20	23	2	11	15	20	3	16	22	32	8	27	1	35	4	3	21	NA	NA	14	19	2
TP349528	TGCAGTCATTCGACTCTACTTATGGCAATAGTGACGTTCTCGACCGAAAAATTTTCGACACATT	TGCAGTCATTCGACTCTACTTATGGCAATAGTGACGTTCTAGACCGAAAAATTTTCGACACATT	0	29	0	50	0	22	0	45	5	20	0	31	NA	NA	0	35	0	52	5	24	0	36	0	34	1	35	NA	NA	0	34	NA	NA	NA	NA	0	34	0	34	0	42	0	20	NA	NA	NA	NA	NA
TP349617	TGCAGTCATTTTTCGGTAACCGTCTTGGTTTAATTCAAATCCAACAATGTCTGCAATTTCAACA	TGCAGTCATTTTTCGGTAACCGTCTTGGTTCAATTCAAATCCAACAATGTCTGCAATTTCAACA	NA	NA	0	199	0	60	20	66	0	33	NA	NA	0	37	0	37	0	30	0	46	8	104	0	25	0	71	18	49	22	41	0	55	NA	NA	0	52	0	56	0	74	0	39	0	25	3	109	0
TP349639	TGCAGTCCAAACTGAATTTTATAATTCGGACGGGCCAATTTACAATATGTTCGAGACCATCGGG	TGCAGTCCAAACTGAATTTTATAATTCGGACGGGCCAATTTACAATATGTTCGAGACCATCGGA	42	0	65	0	54	1	19	1	53	0	37	0	NA	NA	20	0	124	0	NA	NA	21	0	34	0	47	0	25	0	43	0	NA	NA	38	0	32	0	20	0	NA	NA	40	0	39	0	33	0	27
TP350324	TGCAGTCCATGCCTATCAACAGCAGCAGCAACAACAACACCACCACGAACAGCAAATGTTGTAC	TGCAGTCCATGCCTATCAACAGCAGCAGCAACAACAACACCACCACGAACAGCAAATGTTGTAA	27	0	54	0	21	0	37	1	51	1	29	0	NA	NA	50	2	110	1	54	1	38	0	50	0	48	3	NA	NA	22	1	NA	NA	44	2	39	0	35	0	23	1	28	2	NA	NA	40	0	28
TP350559	TGCAGTCCCATAAGAGGATTTTCATTTCGTGAATCGGCCGTGGAATTTGAGGAAAACATTTCTG	TGCAGTCCCATAAGAGGATTTTCATTTCGTGAATCGGCCGTGGAATTTGAGGAAAACATTTCCG	11	44	10	60	39	32	7	84	16	50	7	65	10	30	24	29	0	99	0	33	23	65	43	30	36	34	0	58	3	69	16	49	12	47	13	31	5	58	0	62	2	32	7	34	39	57	0
TP350621	TGCAGTCCCCCCGCGTCATGCACTGCACTGGTCTCCCGTTGGCAAATATGTTCCAGCAGTTTTA	TGCAGTCCCCCCGCGTCATGCACTGCACTGGTCTCCCGTTGGCAAATATGTTCCAGCAGTTTAA	0	35	4	47	2	61	2	47	0	33	1	50	NA	NA	0	47	2	77	0	35	0	64	0	45	0	50	0	37	1	51	2	72	0	77	0	91	0	52	0	63	1	21	4	21	0	58	0
TP350990	TGCAGTCCCTGGTTGATCAGCCCGTACAGCATCGACCCGCAATGGTCGCAAAAGGTCGGCCTTT	TGCAGTCCCTGGTTGATCAGCCCGTACAGCATCGACCCGCAATGGTCGCAAAAGGTCGGCCGTT	1	103	2	170	3	122	3	218	3	149	3	185	2	43	2	130	8	354	0	103	4	206	9	162	0	64	1	96	2	87	1	133	0	124	4	231	4	154	3	101	1	78	2	60	1	104	0
TP351410	TGCAGTCCGATCAGCTCGTGCGCGTCGTAGTGGACGCGGAAATCCCAGCGGCATTTCACCGTAC	TGCAGTCCGATCAGCTCGTGCGCGTCGTAATGGACGCGGAAATCCCAGCGGCATTTCACCGTAC	0	75	0	55	0	56	0	133	0	45	0	62	0	20	0	44	0	162	0	67	0	145	0	60	0	47	0	35	0	84	0	51	0	54	0	117	0	57	0	100	0	50	0	42	0	71	0
TP353076	TGCAGTCGAGAAATGATGAAAATTTGAAGATGGAGAAAAAATTGATAATTTATTCGTTAGGGTC	TGCAGTCGAGAAATGATGAAAATTTGAAGATGGAGAAAAAATTGATAATTTATTCGTTAGGGAC	NA	NA	4	62	11	14	12	64	3	19	0	40	13	17	0	35	17	11	50	17	13	56	0	39	32	44	19	36	11	73	6	45	3	34	42	114	32	89	46	134	12	36	2	26	27	40	0
TP353595	TGCAGTCGATCTTCGACCCCTGTCAAACACAACAGTTGCAAGTCGTTTTCAAGCCGTCGCACCA	TGCAGTCGATCTTCGACCCCTGTCAAACACAACAATTGCAAGTCGTTTTCAAGCCGTCGCACCA	40	27	19	34	7	43	47	27	9	28	17	34	8	30	7	26	0	105	1	30	21	2	23	26	3	37	14	24	15	46	0	51	18	44	47	11	66	2	35	0	12	23	NA	NA	18	22	10
TP353882	TGCAGTCGCACAGTGAGTGAGTCCCAAACGCCCTCGGGCTGCGCCATGTCGACCAACTCGCCGC	TGCAGTCGCACAGTGAGCGAGTCCCAAACGCCCTCGGGCTGCGCCATGTCGACCAACTCGCCGC	23	9	48	0	25	2	51	14	30	11	9	15	7	13	14	6	63	9	4	28	13	15	14	12	22	7	NA	NA	28	5	10	19	NA	NA	14	10	NA	NA	0	23	12	11	31	4	13	17	NA
TP353985	TGCAGTCGCACTTTGTCTGAAGCAGAGCGTAAGTGGCCACCAGTCCAGGTCGAATTAGGCGCAA	TGCAGTCGCACTTTGTCTGAAGCAGAGCGTAAGCGGCCACCAGTCCAGGTCGAATTAGGCGCAA	76	0	26	18	74	14	137	18	76	0	62	42	35	5	NA	NA	121	0	46	0	131	0	78	21	NA	NA	131	0	111	21	NA	NA	59	5	61	7	76	0	121	0	36	0	NA	NA	77	27	18
TP354529	TGCAGTCGCCGTCGTCGCTCCGTTGTCGCCGTCGCATTGGCCATTTCGTCCGTGTCCAATTCGG	TGCAGTCGCCGTCGTCGCTCCGTTGTCGCCGTCGCATTGGCCATTTCGTCCGTGTCCAATTCGC	100	0	118	0	86	0	158	0	100	0	71	0	69	0	75	0	172	0	155	0	132	0	79	0	90	0	50	0	88	0	74	0	88	0	199	0	131	1	110	0	89	0	37	0	117	0	58
TP355051	TGCAGTCGCTAATCGTCGCGCCTTTGGGCAGTGATTGGCGTCGGAAGTGCGTCCGTTGTGAAAA	TGCAGTCGCTAATCGCCGCGCCTTTGGGCAGTGATTGGCGTCGGAAGTGCGTCCGTTGTGAAAA	44	42	114	33	56	34	46	120	70	53	66	31	47	10	37	16	91	61	73	65	99	45	105	3	27	76	19	53	7	117	85	7	19	74	101	37	19	48	50	69	25	25	49	8	59	32	58
TP356961	TGCAGTCGGTGGTCATTCGTCTTCGTCCTCCTCCTCGTTTTCTGCTGCTGCCGCCCCATTTGAC	TGCAGTCGGTGGTCATTCGTCTTCGTCCTCCTTCTCGTTTTCTGCTGCTGCCGCCCCATTTGAC	80	0	82	0	108	0	111	4	91	0	60	0	29	0	63	0	173	0	103	0	72	39	88	0	76	0	82	0	91	5	41	0	65	0	93	0	61	0	80	0	46	0	44	0	72	0	49
TP357082	TGCAGTCGTAGAAAGCTGATCGTTTGTTCCTGCTCCTTCAGCTGTTTGTCCAACTGCTCGGTTT	TGCAGTCGTAGAAAGCTGATCGTTTGTTCCTGCTCCTTCAGCTATTTGTCCAACTGCTCGGTTT	11	31	110	139	38	15	121	41	31	79	49	81	83	49	34	48	101	42	29	159	37	18	34	32	27	47	42	47	118	51	105	42	89	159	20	168	27	84	3	92	71	28	36	0	41	31	24
TP357481	TGCAGTCGTTCCAGCCGAGCCGTGCATATGCTTTTCCTCCTCTCCAACTCGTCCTGCTCCGTGT	TGCAGTCGTTCCAGCCGAACCGTGCATATGCTTTTCCTCCTCTCCAACTCGTCCTGCTCCGTGT	53	18	16	87	11	69	1	112	32	75	60	36	4	25	10	33	13	122	78	7	33	77	23	47	10	75	4	26	2	93	25	46	20	38	69	29	43	4	84	0	33	4	15	35	20	59	6
TP357529	TGCAGTTGTTCGAGCGCGCAGAAAATTTACGCGCCTTGGGCGCATCAAAGTGTAGGTGCGATGT	TGCAGTCGTTCGAGCGCGCAGAAAATTTACGCGCCTTGGGCGCATCAAAGTGTAGGTGCGATGT	49	107	23	65	21	228	2	59	25	229	3	227	10	150	9	137	13	131	16	77	5	379	1	313	16	119	5	100	0	161	38	154	6	153	10	239	12	99	0	170	11	85	9	48	16	182	3
TP357575	TGCAGTCGTTCTCCTCCTCCTCTTCGTCCACAATTCGTCTGATCAGTGCGTAGATCAGCATCCG	TGCAGTCGTTCTCCTCCTCCTCTTCGTCCACAATTCGTCTAATCAGTGCGTAGATCAGCATCCG	39	0	34	1	76	1	17	29	35	9	25	2	35	2	NA	NA	66	0	40	16	24	56	42	3	28	0	2	37	28	40	28	0	33	9	28	35	16	37	8	32	32	0	26	0	59	0	19
TP357600	TGCAGTCGTTGAAATCCGTAGTCAATGCTCGGCTCGGTCAGCGCTTAATGTGGACAAATTTTAT	TGCAGTCGTTGAAATCCGTAGTCAATGCTCGGCTCGGTCAGCGCTTAATGGGGACAAATTTTAT	0	51	2	64	0	20	6	69	1	28	0	28	6	15	1	47	77	62	0	26	18	54	0	35	1	42	1	200	11	64	6	27	56	30	3	562	17	152	8	415	14	35	4	31	0	38	0
TP357738	TGCAGTCGTTTTCTCTTTCTCCTTTTTCTCTTACTTATCGACAGTTTTCCTAAATGCTTTTCTG	TGCAGTCGTTTTCTCTTTCTCCCTTTTCTCTTACTTATCGACAGTTTTCCTAAATGCTTTTCTG	50	0	94	0	64	0	74	5	35	0	54	0	44	0	33	0	103	0	29	0	49	0	42	0	49	0	NA	NA	52	21	52	0	90	0	82	0	55	0	45	0	25	0	28	0	59	0	28
TP357971	TGCAGTCTCGAGCCCGAGGGGGAACTTTCGCCAATTGCCAATAGTTCACTCGTCACAAATCTCA	TGCAGTCTCGAGCCCGAGGGGGAACCTTCGCCAATTGCCAATAGTTCACTCGTCACAAATCTCA	74	4	60	10	104	18	122	17	133	6	94	9	72	0	55	0	178	39	147	0	113	10	135	7	86	9	52	1	126	11	92	25	71	6	166	5	57	0	89	2	97	0	41	0	106	3	64
TP358093	TGCAGTCTCTGCTTATTTCTTTTTCTGTTGTTTTAGAGACTCTCGACTCTTTTCCAGCCGAGAA	TGCAGTCTCTGCTTATTTCTTTTTCTGTTGTTTTAGAGACTCTCGACTCTTCTCCAGCCGAGAA	39	21	39	34	38	78	27	49	13	20	16	32	NA	NA	11	52	33	92	48	0	15	43	31	45	16	47	7	15	11	42	19	38	50	31	35	13	14	20	35	25	21	19	NA	NA	34	20	40
TP358311	TGCAGTTTGGACTAATTGTTTCCTGCTTATTCACCTGACTGAAATGACAGCGCTCTGTCCCGAT	TGCAGTCTGGACTAATTGTTTCCTGCTTATTCACCTGACTGAAATGACAGCGCTCTGTCCCGAT	73	2	73	0	84	0	98	21	58	0	33	0	28	0	24	0	68	0	68	0	55	22	23	0	56	9	29	30	60	0	63	0	50	0	69	1	29	14	35	44	44	2	43	0	66	7	41
TP358812	TGCAGTGAAAGTGATTCGTCGGTAAGCATCCCCGACGGCGCTTGTGACGCGTCCCCTTGGCACT	TGCAGTGAAAGTGATTCGTCGATAAGCATCCCCGACGGCGCTTGTGACGCGTCCCCTTGGCACT	NA	NA	48	0	50	13	41	3	21	0	16	15	20	2	21	1	44	46	29	25	67	9	21	20	38	4	12	19	49	14	6	19	27	11	49	3	62	2	73	11	NA	NA	20	1	27	21	21
TP359113	TGCAGTGAATTAAACCCTCTGAAAATGAAATTCCTTTCCAAAATCAGTTCGTTTTTGAATTTGA	TGCAGTGAATTAAACCCTCTAAAAATGAAATTCCTTTCCAAAATCAGTTCGTTTTTGAATTTGA	48	2	73	0	46	0	77	0	46	0	49	0	NA	NA	32	0	70	0	22	20	81	0	67	0	NA	NA	30	0	73	0	34	0	46	0	76	0	44	0	51	0	38	2	32	0	55	0	31
TP359215	TGCAGTGACAGCTTTCGTAAATTGGCACCACGACGGAGAAGCGCGAAAGGTCCGCCACCCCCCT	TGCAGTGACAGCTTTCGTAAATTGGCACCACGACGGAGAAGCGCGAAAGGTCCGCCACCCCCCC	58	7	29	14	31	22	68	15	37	6	32	3	19	4	27	15	97	20	33	12	39	12	39	5	58	13	21	8	40	14	41	9	17	5	45	12	40	15	47	16	NA	NA	20	7	47	20	NA
TP359915	TGCAGTGATCCCTTTTTGATACTGTTCCAGTTAATGTATCGGTGCCTTCTTGATACCGTACCTT	TGCAGTGATCCCTTTTTGATACTGTTCCAGTTAATGTATCGGTCCCTTCTTGATACCGTACCTT	NA	NA	52	3	27	0	25	5	54	3	57	3	NA	NA	NA	NA	104	0	34	0	75	11	31	0	NA	NA	8	14	40	0	10	44	4	47	22	10	NA	NA	NA	NA	NA	NA	34	0	39	0	NA
TP359957	TGCAGTGATCGCCATAATCCCCGCTTGGATGTCGTAGTCGGAAGTGATCATTCGCTCCAACGCC	TGCAGTGATCGCCATAATCCCCGCTCGGATGTCGTAGTCGGAAGTGATCATTCGCTCCAACGCC	NA	NA	27	8	0	34	21	30	14	28	3	21	NA	NA	34	0	34	41	18	26	12	17	26	12	17	8	26	8	22	26	0	43	23	12	30	15	27	8	NA	NA	15	5	14	13	NA	NA	NA
TP360097	TGCAGTGATGTCCTGTTGCTGTTGTTGTCTTCGTCCATGGATGCTGCTACTACTGCTCTCCACC	TGCAGTGATGTCCTGTTGCTGTTGATGTCTTCGTCCATGGATGCTGCTACTACTGCTCTCCACC	103	37	21	83	93	76	19	157	20	88	92	72	18	55	8	108	29	280	0	88	52	167	38	79	14	90	19	72	9	172	86	85	0	178	28	157	0	148	10	47	4	96	3	123	62	93	67
TP360129	TGCAGTGATTCGTACGCTTGAGGAAAGAGTGCCACACAACGCATTGAATGGGCAAAGACGGCAC	TGCAGTGATTCGTACGCTTGAGGAAAGAGTGCTACACAACGCATTGAATGGGCAAAGACGGCAC	99	0	57	0	98	0	142	0	134	0	95	4	66	4	93	0	177	0	25	53	134	0	122	0	90	0	95	0	136	0	102	0	116	0	99	0	125	0	126	0	26	0	33	0	128	0	47
TP360757	TGCAGTGCATCTTCGAATGCCTTGTGCTCTTTGATTTGGCGTTCCAACTCCTCCAAGTTGGTGG	TGCAGTGCATCTTCGAATGCCTTGTGCTCTTTGATTTGGCGTTCCAACTCCTCCAAGTTGGTGC	32	0	21	0	83	0	41	0	24	0	84	0	34	0	27	0	203	0	43	0	76	0	NA	NA	NA	NA	46	0	44	0	46	0	NA	NA	54	0	34	0	NA	NA	31	0	25	0	60	0	35
TP360815	TGCAGTGCGTTCATGATCAGTCCGCGGTTCGACTTCGGCGGTTGTTTTGCGTACAGTTTCAGCG	TGCAGTGCATTCATGATCAGTCCGCGGTTCGACTTCGGCGGTTGTTTTGCGTACAGTTTCAGCG	0	26	0	59	0	30	3	31	0	34	0	26	0	42	0	32	0	74	0	28	11	31	0	39	NA	NA	2	26	NA	NA	NA	NA	2	31	12	25	7	14	14	16	0	32	NA	NA	0	25	0
TP361353	TGCAGTGCCGCCCAGCAATTCTTGCAAAATGCGATTCAGCTTCGAATTTCTGAAAATTTTGCAA	TGCAGTGCCGCCCAGCAATTCTTGCAAAATGCGATTCAGCTTCGAATTTCTGAAAATATTGCAA	29	6	16	5	11	28	43	6	20	2	19	16	NA	NA	NA	NA	68	0	24	12	20	1	33	10	NA	NA	20	0	24	10	11	25	19	7	30	9	34	0	32	0	16	11	NA	NA	NA	NA	NA
TP361481	TGCAGTGCCGTGACCAAATGATGGACAATTCGCTTGGACAAACGGATGAGACAAAAAAGTGGCG	TGCAGTGCCGTAACCAAATGATGGACAATTCGCTTGGACAAACGGATGAGACAAAAAAGTGGCG	20	3	15	12	27	5	26	13	14	15	13	18	NA	NA	17	27	36	33	17	6	23	23	NA	NA	17	18	NA	NA	33	22	19	3	19	9	16	18	15	13	NA	NA	13	10	15	7	32	19	NA
TP361483	TGCAGTGCCGTGACCAAATGATGGACAATTCGCTTGGACAAACGGATGAGACAAAAAGTGGCGC	TGCAGTGCCGTAACCAAATGATGGACAATTCGCTTGGACAAACGGATGAGACAAAAAGTGGCGC	67	16	27	21	51	33	50	31	35	37	49	41	23	26	27	51	93	123	51	65	49	79	77	48	25	38	21	24	40	37	63	33	40	8	77	87	21	39	40	3	24	24	16	27	32	41	49
TP361679	TGCAGTGCCTGCAACGCGTTCTCAACCTCGGCACTGCTTTGCAGTTCACCATCCATTCGAAGGA	TGCAGTGCCTGCAACGCGTTCTCAACCTCGGCACTGCTTTGCAGTTCACCATCCATTCAAAGGA	115	0	146	0	194	0	344	0	242	0	217	0	158	3	134	0	409	0	186	0	255	5	284	0	125	2	133	9	282	0	160	7	201	0	211	35	95	96	165	46	141	32	158	0	250	0	137
TP361853	TGCAGTGCCTTTGGCCAGTTGTGAGCGGTAATTGTTGTGTAAGGCGAGCACCGCTACGCGGCTG	TGCAGTGCCTTTGGCCAGTTGTGAGCGATAATTGTTGTGTAAGGCGAGCACCGCTACGCGGCTG	67	18	51	70	12	59	47	74	79	52	26	52	32	31	47	14	25	216	41	3	95	39	35	96	21	60	51	9	27	80	88	6	57	56	51	35	88	19	69	34	29	28	26	10	65	45	44
TP362496	TGCAGTGCGGCCAGAAACTCCAGCAGCGAGTGCTTCAGCATTTTTCTGCAACAAAATGATGATG	TGCAGTGCGGCCAGAAACTCCAGCAGCGAGTGTTTCAGCATTTTTCTGCAACAAAATGATGATG	0	53	11	69	10	66	34	53	4	67	4	87	12	29	1	44	29	194	22	45	15	51	12	49	5	70	53	15	16	100	0	94	3	80	69	55	67	11	62	0	14	43	NA	NA	28	95	16
TP363171	TGCAGTGCTGCTCTCCATTAAACCCCTGGAAGCAATGCCTTTGTGATGGGTCGACGAACACTGT	TGCAGTGCTGCTCTCCATTAAACCCATGGAAGCAATGCCTTTGTGATGGGTCGACGAACACTGT	71	0	175	0	92	0	92	0	100	14	56	2	138	0	150	0	205	1	129	2	118	9	82	0	111	7	22	3	63	0	160	0	126	0	99	18	NA	NA	7	13	104	0	43	0	118	0	35
TP363522	TGCAGTGGAAGAAATGCATTTAACGGGCTGGAAAGGGTCAGTCATTTTGAAAGGGCACTTCAGC	TGCAGTGGAAGAAATGCATTTAACGGGCTGGAAAGGGTCAGTCATTTTAAAAGGGCACTTCAGC	45	13	52	3	43	14	100	10	38	20	43	24	25	8	35	9	102	37	46	2	71	4	22	23	81	0	41	3	61	16	0	49	NA	NA	77	14	45	9	49	1	26	17	26	2	51	4	27
TP364091	TGCAGTGGATTCATTGGTGCCGTCGCGAATGGCATTGCGCCGCCGTTCATCATTAGGCCGAAGG	TGCAGTGGATTCATCGGTGCCGTCGCGAATGGCATTGCGCCGCCGTTCATCATTAGGCCGAAGG	0	109	0	158	0	168	0	185	0	101	0	181	0	79	0	80	0	309	0	135	9	210	0	134	4	110	16	113	0	141	0	101	1	21	44	101	123	27	112	78	37	35	0	69	0	115	0
TP364332	TGCAGTGGCATACCGTAAAACGGCTTGTTTGAATGTGTTGAAGTGTAGTAGGCGGCACGCGTCG	TGCAGTGGCATACCGTAAAACGGCTTGTTTGAATGTGTTGAAGTGTAGTAGGCGGCACACGTCG	114	0	174	1	154	59	428	0	163	7	173	0	117	0	138	0	254	0	160	29	488	45	232	0	211	0	76	35	372	0	198	0	261	0	218	0	213	0	286	0	131	5	86	9	161	0	93
TP364428	TGCAGTGGCCCTCAATTTTGTGACACAGCAGGCAGCTGCCCAACTCATTTGTATTTGTAGGTCG	TGCAGTGGCCCTCAATTTTGTGACACAGCAGGCAGCAGCCCAACTCATTTGTATTTGTAGGTCG	76	0	65	0	42	0	77	20	136	1	64	0	48	0	25	0	183	10	62	0	89	18	76	0	NA	NA	NA	NA	111	0	NA	NA	74	0	71	0	NA	NA	26	0	41	0	37	1	88	0	51
TP364615	TGCAGTGGCGCATAAACTTTTTAAGTTTTATTGCATTTTTCGTTTGAAATTTTCCCCTTGGGCG	TGCAGTGGCGCATAAACTTTTTAAGTTTTAGTGCATTTTTCGTTTGAAATTTTCCCCTTGGGCG	32	16	NA	NA	79	0	18	8	62	0	45	8	26	0	28	6	31	38	50	2	75	39	24	4	26	4	38	0	57	0	53	0	23	27	31	10	30	0	26	0	20	6	NA	NA	42	0	38
TP365760	TGCAGTGGGTCAGTCTGTGCCATTCCTTGCCTTTGGCAATTCTTTCCCAAATTACCAATTGCAC	TGCAGTGGGTCAGTCTGCGCCATTCCTTGCCTTTGGCAATTCTTTCCCAAATTACCAATTGCAC	NA	NA	0	39	NA	NA	0	46	0	42	0	23	NA	NA	NA	NA	0	55	NA	NA	3	39	0	34	0	27	0	27	0	48	0	23	0	23	0	68	0	29	0	24	0	31	0	24	0	49	0
TP365765	TGCAGTGGGTCAGTTTGTGCCGTTCTTTGCCTTTGGCAATCCTTTCCCAAATAACCAATTGCAC	TGCAGTGGGTCAGTCTGTGCCGTTCTTTGCCTTTGGCAATCCTTTCCCAAATAACCAATTGCAC	16	26	NA	NA	0	41	1	26	8	19	21	27	0	21	NA	NA	4	79	0	60	11	25	11	15	12	12	2	29	1	39	17	20	0	28	4	45	0	30	NA	NA	5	21	0	23	10	44	12
TP365818	TGCAGTGGGTGAAAAATCGCGCACCCCAACCACAATTCGTGGCCAATCGGTTGGCCGAGATTCG	TGCAGTGGGTGAAAAATCGAGCACCCCAACCACAATTCGTGGCCAATCGGTTGGCCGAGATTCG	1	24	0	64	15	57	8	91	15	48	8	92	8	46	19	32	5	249	0	91	14	83	10	89	5	65	7	83	10	68	16	66	NA	NA	2	78	11	34	6	31	2	60	1	35	4	56	8
TP365914	TGCAGTGGGTTTGATCACACAGATCACTCAGCTGGAAGCACACAGCTATGACCAGCCCGCTTGG	TGCAGTGGGTTTGATCACACAGATCACTCAACTGGAAGCACACAGCTATGACCAGCCCGCTTGG	0	99	0	32	0	93	0	67	0	64	NA	NA	0	41	3	71	0	155	37	180	3	67	0	59	0	51	0	60	0	86	0	37	4	77	0	130	0	122	0	99	0	49	0	39	0	61	0
TP366050	TGCAGTGGTCCCTGTTCATCTTCGCCTTTGTGCTCGTCCCCTGCTCCACTTTCAACTTTTCGCT	TGCAGTGGTCCCTGTTCATCTTCGCCTTTGTGCTCGTCCCCTGCTCCACATTCAACTTTTCGCT	NA	NA	17	3	54	31	101	52	46	20	57	4	26	9	35	3	156	25	72	0	73	0	39	16	44	11	29	5	69	15	51	0	56	14	77	0	28	0	33	3	45	2	31	7	73	1	47
TP366247	TGCAGTGGTGGAGGAACCGCATCTTCCTCCACCTGACCAAGCACAGCTACCAGATGGACGTTTG	TGCAGTGGTGGAGGAACCGCATCTTCCTCCACCTGACCAAGCACAGCTACCAGATGGACGATTG	406	48	517	0	352	48	719	6	464	0	462	4	237	10	228	3	1197	0	635	60	813	4	633	0	491	20	310	23	599	4	493	7	247	25	468	80	471	8	739	35	294	3	327	0	522	12	298
TP366310	TGCAGTGGTGGTGGTGGTGGCGGCGACTTGCTGATATAACCCACGGAAGGGCCACAATGAATTT	TGCAGTGGTGGTGGTGGTGGCGGCGACTTGCTGATATAACCCACGGAAGGGCCACAATCAATTT	NA	NA	42	18	55	44	83	61	8	48	31	73	28	0	30	9	101	92	0	85	0	124	0	58	NA	NA	15	71	75	63	1	88	58	66	3	93	0	91	0	166	15	32	NA	NA	109	9	11
TP366370	TGCAGTGGTTCAAGTTCGGGGGATATTTTTTCTCGTTTTGAAAAGGACGCGGAATTTGATCAAT	TGCAGTGGTTCAAGTTCGGGGGATATTTTTTCTCGTTTTGAAAAGGACGCAGAATTTGATCAAT	3	40	56	49	26	32	30	60	20	29	28	31	12	39	31	24	15	112	9	22	37	61	9	51	16	29	9	18	4	16	5	53	7	31	17	34	21	9	NA	NA	9	16	16	12	17	49	9
TP366566	TGCAGTGTAACGCCCTGACAATGAAATTGCGAACCATTCAAACCCATCGATTCGCCCGCTCACC	TGCAGTGTAACGCCCTGACAATGAAATTGCGAACCATTCAAACCCATCGATTCGCCCACTCACC	60	21	23	18	47	30	41	63	18	33	37	28	27	5	44	12	51	79	32	60	6	65	16	36	41	28	4	45	26	41	7	58	21	69	18	89	18	51	0	72	24	28	NA	NA	37	25	21
TP366630	TGCAGTGTACGCGTCCAATCAATGACCTTTCTCAGTTTCTTAGGCCAAAACTTTTTCTTACTTT	TGCAGTGTACGCGTCCAATCAAAGACCTTTCTCAGTTTCTTAGGCCAAAACTTTTTCTTACTTT	16	30	5	24	13	10	17	28	13	26	16	16	16	9	NA	NA	46	48	4	28	43	13	16	35	14	16	20	2	NA	NA	4	34	13	15	54	17	25	10	25	1	9	17	5	19	24	22	9
TP366719	TGCAGTGTCAAATGACTCCACCCATTCAGCGACACAAATGGCACAAAGCGGGGCGAGTTCAGAA	TGCAGTGTCAAATGACTCCAACCATTCAGCGACACAAATGGCACAAAGCGGGGCGAGTTCAGAA	49	9	101	0	84	0	148	0	69	7	59	0	NA	NA	70	0	128	10	14	63	153	0	88	0	51	0	40	10	102	0	62	0	56	0	130	0	93	5	100	0	103	0	45	0	66	19	39
TP366851	TGCAGTGTCCACCACGTCGGCATCATTAAAGACCGCCTATTCGGCAATAATTGATGTGCTTGAG	TGCAGTGTCCACCACGTCGGCATCATTAAAGACCGCCTATTCGGCAATAATTGATGTGCTTGAA	56	69	163	21	13	119	67	75	26	58	91	58	38	20	18	66	6	229	37	50	91	29	85	36	44	61	38	30	56	54	3	77	NA	NA	23	152	40	47	99	48	22	58	22	74	42	67	15
TP367035	TGCAGTGTCGTCTTGATTGGATTTTTGGCGACAGCTGCGCATGAAGTGCATTTTTGGACGAACG	TGCAGTGTCGTCTTGATTGGATTTTTGGCGACTGCTGCGCATGAAGTGCATTTTTGGACGAACG	129	3	343	27	151	33	259	58	243	8	209	29	83	8	98	37	362	150	169	0	303	9	137	4	164	8	153	14	241	38	212	0	197	38	152	0	229	16	188	1	110	14	88	15	276	8	121
TP367097	TGCAGTGTCTCGGTCGGTTTTGTTTAATGTTCTCGAGTCGAACTTCGTTTTCTTGATTTGACTC	TGCAGTGTCTCGGTCGGTTTTGTTTAATGTTCTCGAGTCGAACTTCGTTTTCTTGATTCGACTC	0	53	0	31	0	69	30	40	0	32	0	41	NA	NA	NA	NA	0	64	0	34	0	37	0	27	0	64	0	20	31	34	0	34	0	22	0	43	0	27	NA	NA	0	31	NA	NA	0	66	0
TP367128	TGCAGTGTCTGGTCAATGGGTTCGCCCGTCTGCGTGTCGGCCAATGCGACGGCCATTGCGAAGG	TGCAGTGTCTGGTCAATGGGTTCGCCCGTCTGCGCGTCGGCCAATGCGACGGCCATTGCGAAGG	NA	NA	0	35	0	68	10	31	0	53	0	33	11	20	0	35	0	102	21	14	8	31	0	34	NA	NA	22	16	3	31	NA	NA	0	55	11	43	9	23	23	8	NA	NA	0	23	0	73	NA
TP367327	TGCAGTGTGGCACCCACCTCTGCACATCCAACTTGTCAAGCTCTGAAATGGTTTCAGCATTCTT	TGCAGTGTGGCACCCACATCTGCACATCCAACTTGTCAAGCTCTGAAATGGTTTCAGCATTCTT	52	0	60	1	73	0	62	9	65	0	40	0	39	0	59	0	134	0	59	0	84	16	65	0	51	0	32	12	52	2	75	0	57	0	98	6	64	14	20	14	35	12	NA	NA	104	0	39
TP367626	TGCAGTGTTCTGTCAACGGCCTTTCAACGGCACAACCGTTGACAAAAAGGTTGTGACAGACAAT	TGCAGTGTTCTGCCAACGGCCTTTCAACGGCACAACCGTTGACAAAAAGGTTGTGACAGACAAT	0	130	2	166	0	0	0	184	0	118	0	29	0	57	0	101	0	291	0	107	0	234	0	32	0	89	0	116	0	174	0	235	48	106	16	113	13	42	20	96	4	142	0	111	0	171	0
TP367835	TGCAGTGTTTTCCAACCATCGCCTGTCAAAGTGAAATTCATCCAAGACAGTCTTTCCACAAATG	TGCAGTGTTTTCCAACCATCGCCTGTCAAAGTGAAATTCATCCAAGACAGTATTTCCACAAATG	51	3	23	11	53	8	71	7	21	9	25	1	20	3	6	21	64	14	46	0	87	7	41	16	50	0	55	2	65	7	18	2	57	4	58	0	97	0	64	0	43	6	32	1	36	38	29
TP367880	TGCAGTGTTTTTGGTGCATTTTGTCTCCACAGCGATCGCTTTTTCCCAAAATTCATTGACCTCT	TGCAGTGTTTTTGGTGCATTTTGTCACCACAGCGATCGCTTTTTCCCAAAATTCATTGACCTCT	3	50	0	70	0	58	0	71	0	44	0	50	0	37	0	43	0	117	0	42	0	66	0	40	2	20	16	24	0	34	1	24	17	25	30	44	17	8	39	10	3	33	0	25	0	59	0
TP367988	TGCAGTTAATAATATTGGGCTATTCCATTAAGAGGAATTTTCCTGGCAAAATGCCGTAATCGTC	TGCAGTTAATAATATTGGGCTATTCCATTAAGAGGAACTTTCCTGGCAAAATGCCGTAATCGTC	41	6	9	41	15	18	73	0	33	18	36	9	NA	NA	20	1	51	14	7	15	37	7	40	29	31	1	18	2	52	4	0	46	23	11	17	5	15	6	52	0	22	1	11	12	16	18	26
TP368080	TGCAGTTAGAGTGGTGTATAATGTGAAAATTCAACCGCGTTCATCGGCGTTAATTGAAGTTGCA	TGCAGTTACAGTGGTGTATAATGTGAAAATTCAACCGCGTTCATCGGCGTTAATTGAAGTTGCA	29	4	35	33	36	9	36	66	26	15	46	0	35	10	19	15	66	3	18	16	49	15	46	3	NA	NA	16	13	41	29	0	29	36	26	27	7	2	28	0	44	15	29	NA	NA	47	8	23
TP368228	TGCAGTTAGAGTAGTGTACAATGTGAAAATTCAACCGCGTTCATCGACGATAATTGAAGTGGCA	TGCAGTTAGAGTAGTGTACAATGTGAAAATTCAACCGCGTTCATCGACGATAATCGAAGTGGCA	213	0	298	0	186	0	253	0	182	0	197	0	181	3	88	0	468	0	164	0	306	8	201	0	119	0	120	12	159	0	162	0	127	21	206	13	196	25	137	18	64	0	130	0	265	0	113
TP368248	TGCAGTTAGCACTTGAGCTCGTCTCTTCGCGTAACGTAAGTCTTTTCAGCAATTTTTCAATTGG	TGCAGTTAGCACTTGAGCTCGTCTCTTCGCGTAACGTAAGTCTTTTCAGCAATTTTTCAATTGC	88	1	47	1	57	0	85	0	56	0	46	0	33	0	28	0	145	0	75	0	82	0	56	0	90	0	58	2	63	0	56	1	58	0	104	0	52	0	33	0	21	0	49	0	71	0	32
TP368419	TGCAGTTATTCTAATTTTATTGTATAATATTCTCATGTTAAACCGATAATTTTGCACTTGTTTT	TGCAGTTATTCTAATTTTATTGTATAACATTCTCATGTTAAACCGATAATTTTGCACTTGTTTT	20	171	44	906	27	413	74	514	12	317	19	469	6	124	13	133	61	858	19	183	102	452	25	447	14	255	13	139	75	339	5	179	13	198	62	376	38	279	28	285	16	256	4	149	5	84	3
TP368527	TGCAGTTCCAATGACAAATCAGCAACAACAACCGCAACAAGTACAACAACAACAGAAACAAGAA	TGCAGTTCAAATGACAAATCAGCAACAACAACCGCAACAAGTACAACAACAACAGAAACAAGAA	29	20	9	63	39	41	80	49	29	58	29	23	12	15	44	16	43	163	64	0	43	59	69	33	19	81	22	32	36	41	5	58	50	17	15	52	20	37	1	53	42	11	26	7	55	23	32
TP369277	TGCAGTTCACGCGGCCCATTCCTGCAAAAGTGGAGCTGGTTTATGCTAGGCCAATCGCATTTTT	TGCAGTTCACGCGGCCCATTCCTGCAAAAGTGGAGCTGGTTTATGCTAGGCCAATCGCATTTTC	74	2	91	0	71	0	178	2	84	0	58	1	33	0	45	1	178	0	61	2	115	2	86	4	70	1	61	0	127	2	38	2	58	0	115	2	57	0	49	0	89	2	42	0	85	1	35
TP369415	TGCAGTTCAGCCAATTGTTTCCGCAGCTGCGCAACGCGATGTTGCAGTTCGAAATTGGCCTCGT	TGCAGTTCAGCCAATTGTTTCCGCAGCTGCGCAACGCGATGTTGCAGCTCGAAATTGGCCTCGT	63	17	143	98	121	60	64	120	77	72	56	71	41	45	46	31	100	104	NA	NA	111	151	59	71	41	49	6	83	57	200	91	18	56	73	53	74	1	63	0	66	37	51	61	37	49	98	37
TP369703	TGCAGTTCATCCAGTCTTTTCTTCGGTTTTCCTCTGTTTGGTGGCGCTAAAATTGAAAAAATGA	TGCAGTTCATCCAGTCTTTTCTTCGGTCTTCCTCTGTTTGGTGGCGCTAAAATTGAAAAAATGA	0	63	32	23	22	47	12	52	16	17	11	33	3	38	12	18	63	70	2	79	18	20	15	44	9	34	NA	NA	15	40	35	16	14	17	5	64	NA	NA	NA	NA	4	30	3	31	1	66	15
TP370607	TGCAGTTCCATCTGACGCATCCGTTCACGGCTCAACTCGGCACTGTTCAGCGTCGACGTGGCCG	TGCAGTTCCATCTGACGCATCCGTTCACGGCTCAACTCGGCACTGTTCAGCGTCGACGGGGCCG	NA	NA	65	7	43	0	55	26	35	4	61	1	NA	NA	24	0	164	3	45	0	42	18	40	2	53	1	19	22	35	0	47	7	46	4	21	17	18	31	18	56	45	5	26	0	65	0	20
TP370770	TGCAGTTCCCCGCAAAAACGTCGGCGAGGGCAACTCGGATGAGTATGGATGCCAACACCTGACC	TGCAGTTCCCCGCAAAAACGTCGGCGAGGGCAACTCGGATGAGTATCGATGCCAACACCTGACC	5	29	NA	NA	0	39	1	73	6	44	9	48	NA	NA	2	25	0	104	0	49	29	42	3	36	0	40	10	11	5	38	0	49	NA	NA	18	41	27	12	27	16	0	32	NA	NA	12	62	3
TP370916	TGCAGTTCCCTTAACAAATGTTGTGGTGCCGCTGGTCCGCCGATGAATTTGCTGCTGTTGTTGT	TGCAGTTCCCTTAACAAATGTTGTGGTGCCGCTGGTCCGCCGATGAATTTGCTGCTGTTGTTGG	0	40	0	42	1	66	0	76	0	57	0	60	0	34	0	33	0	186	0	89	0	77	0	35	0	53	0	26	0	53	0	40	0	51	0	100	1	79	0	55	0	60	0	24	0	82	0
TP371364	TGCAGTTCCGTGTAAAAACGGTCCATGTCTCCGCCAAAATCGCTGGCTTTGCGCGGCACCACGT	TGCAGTTCCGTGTAAAAACGGTCCATGTCTCCGCCAAAATCGCTGGCCTTGCGCGGCACCACGT	10	49	15	29	37	22	74	32	71	15	27	72	22	21	47	3	123	2	40	43	81	33	28	42	34	23	20	24	65	24	15	11	30	40	18	50	36	21	0	50	25	6	19	6	21	30	23
TP372257	TGCAGTTCCTTTTGCTTGTCGGCCCATGCTTTGTTGGTTTGGCGATTGATCTGCTTCAGACGTT	TGCAGTTCCTTTTGCTTGTCGGCCCATGCTTTGTTGGTTTGGCGATTGATCTGCTTCAGACGGT	0	33	0	40	0	65	0	57	0	30	0	31	NA	NA	NA	NA	0	63	0	30	0	35	0	40	NA	NA	0	21	0	31	0	25	0	29	NA	NA	0	25	0	20	NA	NA	0	27	0	42	NA
TP372545	TGCAGTTCGACCGCGACGGATCGCAGCTCTTGTCCGTCAAGGAATGGGAGCGCAATGATGGGCG	TGCAGTTCGACCGCGACGGATCGCAGCTCCTGTCCGTCAAGGAATGGGAGCGCAATGATGGGCG	NA	NA	123	31	30	26	83	29	48	9	70	17	9	16	39	3	64	122	107	25	76	31	5	38	19	36	76	7	46	16	27	7	42	5	102	17	54	5	50	3	38	14	11	18	39	11	20
TP373307	TGCAGTTCGCACAACAATTTGTGCGCGTCTACCACCCGTTGGAGACGTTCAAGCGCTGTCCGAA	TGCAGTTCGCACAACAATTTGTGCGCGTCGACCACCCGTTGGAGACGTTCAAGCGCTGTCCGAA	0	21	0	65	NA	NA	14	33	0	35	0	22	1	32	4	28	0	69	0	32	3	41	0	23	0	59	0	21	7	13	2	44	2	18	15	26	4	16	NA	NA	2	38	NA	NA	0	28	NA
TP374308	TGCAGTTCGCTGTTAATTGCCTTGCTTTTCGCTTTTTTTCTTTCCTCCATCACTGGCTTCCTCT	TGCAGTTCGCTGCTAATTGCCTTGCTTTTCGCTTTTTTTCTTTCCTCCATCACTGGCTTCCTCT	110	18	173	12	107	12	192	53	174	19	193	6	32	2	59	5	300	4	36	101	67	105	192	0	92	12	28	54	112	50	91	4	46	80	22	137	17	136	10	126	48	20	101	0	176	5	67
TP374366	TGCAGTTCGGACAGTTTCATCGTTGACGACAGCGGCGGATGAGACGGACTGTTTTGCAGGACTG	TGCAGTTCGGACAGTTTCATCGTCGACGACAGCGGCGGATGAGACGGACTGTTTTGCAGGACTG	NA	NA	49	0	27	0	59	12	47	0	59	0	25	0	NA	NA	57	0	51	0	30	2	23	0	NA	NA	25	0	43	3	31	0	31	0	38	5	58	1	31	8	30	1	NA	NA	31	0	NA
TP374522	TGCAGTTCGGCACTGCCAATTTGTCGTTGGCGCAATTCGCCAGTCGCTATTGGTGTGCCACCAC	TGCAGTTCGGCACTGCCAATTTGTCGTTGGCGCAATTCGCCAGTCGCTATTGCTGTGCCACCAC	0	31	0	39	0	50	22	48	6	30	0	34	0	25	0	26	1	81	22	55	28	43	NA	NA	3	40	NA	NA	11	48	0	40	3	38	21	24	19	2	21	2	11	45	NA	NA	0	36	NA
TP375402	TGCAGTTCGTCCAGTGCAATTTGCGCAACTCCCAAAAATGACTTTCGTTCAATGCGTCCGTAAT	TGCAGTTCGTCCAGTGCAATTTGCGCAACTCCCAAAAATGACTTTCGTTCAATACGTCCGTAAT	47	4	63	0	48	20	65	10	46	0	45	0	21	0	52	0	142	1	60	9	80	2	42	0	46	0	NA	NA	51	3	38	3	74	0	89	12	52	20	27	24	31	2	46	0	67	0	NA
TP375469	TGCAGTTCGTCCTTCCCTTGTGAGCTGTCAACGTACGGATGTTGCGAGGACGGCGAGACGGCTG	TGCAGTTCGTCCTTCCCTTGTGAGCTGTCAACGTACGGATGTTGCGAGGACGGCGAGACGGCCG	NA	NA	2	35	2	46	13	61	0	41	0	27	NA	NA	NA	NA	0	89	0	35	25	27	15	17	13	28	NA	NA	9	43	NA	NA	0	52	21	9	3	25	27	7	13	18	NA	NA	6	39	5
TP375684	TGCAGTTCGTGACGAGGTAAAATGAGAAGAGCATTTGGGAGGGAAAGCCGATTCATTGACTTTT	TGCAGTTCGTGACGAGGTAAAATGAGAAGAGCATTTGGGAGGGAAAGCCGATTCATTGACTTTG	56	0	43	0	71	0	76	2	66	0	41	2	33	1	38	0	105	0	54	1	75	1	53	1	28	0	46	1	42	0	41	1	51	2	91	1	48	0	49	0	28	0	28	0	49	0	37
TP375900	TGCAGTTCGTTCCCTGCCGCCACGTTCAGAGTTCCCTCGACGGTGCTTTCGTCGAGGCGAAGGC	TGCAGTTCGTTCCCTGCCGCCACGTTCAGAGTTCCCTCGACGGTGCTTTCGTCGAGGCGAAGCC	108	1	85	0	111	0	100	0	113	1	105	0	64	0	50	0	234	2	126	1	130	0	65	0	63	0	69	0	82	0	59	0	83	0	139	0	82	0	99	0	38	0	34	0	75	0	52
TP376687	TGCAGTTCTTCAACAGTTTGCTGCGCTTTTACGACAACGCTTCCGCTGCTGTCCCCGTGGGGTT	TGCAGTTCTTCAACAGTTTGCTGCGCTTTTACGACAACGCTTCCGCTGCTGTCCCCGTGGGGGT	0	44	1	67	0	61	2	90	0	65	1	75	0	28	0	57	2	179	0	40	1	94	3	61	2	63	0	42	0	57	0	53	0	71	0	38	0	39	0	26	0	76	NA	NA	1	79	0
TP377349	TGCAGTTGAAGTGTGATGAGAGATTGCTGTTTCCGCTGTGCTGGAGGTGCGCGTCGATGTTTTA	TGCAGTTGAAGTGTGATGAGAGATTGCTGTTTCCGCTGTGCTGGAGGTGCGCGTCGATGTTTAA	3	77	3	97	0	62	1	58	2	79	2	61	2	40	2	52	2	126	3	53	2	61	1	43	2	40	NA	NA	1	28	2	50	1	74	3	54	1	37	2	74	0	43	1	37	3	84	0
TP377352	TGCAGTTGAAGTTACAGCGTTTGTTGTTGATCCATTTCCTCATCCTCATGCTGCTCCTGCTTGA	TGCAGTTGAAGTTACAGCGTTTGTTGTTGATCCATATCCTCATCCTCATGCTGCTCCTGCTTGA	NA	NA	67	4	27	4	44	3	NA	NA	26	0	34	0	30	4	64	7	45	0	46	0	33	7	24	0	25	0	31	0	21	0	30	1	43	1	21	0	NA	NA	38	0	NA	NA	48	6	NA
TP377636	TGCAGTTGGGCCGCGGTTGCCCAGCGGCTGTACCCGTTGGCGACGCCGTGCGCCTGCGCGGACG	TGCAGTTGAGCCGCGGTTGCCCAGCGGCTGTACCCGTTGGCGACGCCGTGCGCCTGCGCGGACG	60	29	38	57	66	50	118	57	40	53	67	42	32	19	34	40	137	163	101	5	92	20	93	18	47	21	43	13	68	39	73	12	63	38	92	29	81	19	54	4	55	23	24	30	94	30	24
TP377676	TGCAGTTGAGGAAAACGCGCCTTCAGAAAGTCGCGCTTTTCCTGCGAGCTGACGGTGGTAAACA	TGCAGTTGAGGAAAACGCGCCTTCAGAAAATCGCGCTTTTCCTGCGAGCTGACGGTGGTAAACA	118	0	140	0	156	2	228	0	100	18	118	0	31	46	77	9	51	174	101	0	172	0	66	27	80	0	54	4	157	0	62	11	119	0	130	1	68	45	94	0	102	8	43	17	107	23	72
TP377962	TGCAGTTGATTCTGAATGGAGCTTTTTAGTCTTGGGATGCCTCCTAGAACAAGCAGATTCCTAT	TGCAGTTGATTCTGAATGGAGCTTTTTAGCCTTGGGATGCCTCCTAGAACAAGCAGATTCCTAT	0	35	0	55	0	36	22	46	0	40	0	31	NA	NA	NA	NA	0	108	8	30	0	45	0	28	0	38	8	17	7	25	NA	NA	0	35	11	28	3	27	13	20	0	51	0	29	0	32	0
TP377986	TGCAGTTGCAAAAACATCGCAAAATGCATTCACTGACGCAGATTCGTAGTCAAAATTTGTTTGG	TGCAGTTGCAAAAACATCGCAAAATGCATTCACTGACGCAGATTCGTAGTCAAAATTTGTTAGG	NA	NA	16	19	21	3	33	11	16	4	NA	NA	NA	NA	20	7	50	6	27	2	31	14	29	8	NA	NA	29	1	32	1	NA	NA	21	8	24	9	22	10	43	0	20	5	26	5	25	2	17
TP378056	TGCAGTTGCAATGTGTTTGCGATCTCTGCCCGTCGCGTTTTGTTCAAATATTTGTTCGTATGGA	TGCAGTTGCAATGTGTTTGCGATCTCCGCCCGTCGCGTTTTGTTCAAATATTTGTTCGTATGGA	0	191	0	215	0	173	126	67	0	266	0	147	0	128	0	132	0	362	0	140	97	131	0	218	0	96	32	50	42	183	0	163	0	140	0	229	0	182	0	124	0	128	0	138	0	164	0
TP378203	TGCAGTTGCAGCAACAATTCACCGCCCTTATGCAGTCACAACCCCAACAACCGCCTGCTGCCCA	TGCAGTTGCAGCAACAATTCACCGCCCTTATGCAGTCACAACCCCAACAACCGCCCGCTGCCCA	5	112	132	99	79	53	162	145	42	159	20	134	46	38	32	82	24	306	29	124	10	94	77	78	37	66	12	95	78	107	60	47	98	71	69	172	1	210	0	186	71	64	11	85	72	95	22
TP379066	TGCAGTTGCGGCAAAGGCCGTGTCGCCACCGTTGCGATCATTCCCTGCCCTCCATCCTCTCCTT	TGCAGTTGCGGAAAAGGCCGTGTCGCCACCGTTGCGATCATTCCCTGCCCTCCATCCTCTCCTT	196	40	205	0	221	0	316	0	226	0	115	0	128	0	151	0	504	0	172	0	307	0	221	0	173	4	180	27	249	0	163	0	247	0	221	119	228	27	185	25	136	9	139	0	293	0	173
TP379138	TGCAGTTGCGGCGCTTGTCGCCGCAACATTCGGTTGTTGGTGTAGCTGGTGTTATTCATTTGTT	TGCAGTTGCGGCGCTTGTCGCCACAACATTCGGTTGTTGGTGTAGCTGGTGTTATTCATTTGTT	27	0	43	0	48	0	81	0	31	0	24	0	22	0	NA	NA	100	0	57	0	26	0	46	0	26	0	NA	NA	21	0	24	0	29	0	45	0	26	0	NA	NA	31	0	NA	NA	69	0	20
TP379205	TGCAGTTGCGGGTCGTTGATGGGCGTTACGCGGCACTCCAAGTGCACGGATTCGCCCTCCGCGG	TGCAGTTGCGGGTCGTTGATGGGCGTCACGCGGCACTCCAAGTGCACGGATTCGCCCTCCGCGG	69	68	127	179	137	7	113	83	104	66	72	33	33	26	42	38	88	224	2	162	29	186	118	7	44	35	75	42	44	127	83	31	40	110	94	150	52	90	31	98	19	81	40	24	59	145	35
TP379311	TGCAGTTGCGTTCGCCTTCATTTTGTGCTTTTTCTGCCATTTGGACTGTTTCATCAGTTTTATT	TGCAGTTGCGTTCGCCTTCATTTTGTGCTTTTTCTGCCATTTGGACTGTTTCACCAGTTTTATT	21	45	20	54	2	57	54	29	34	18	12	25	22	7	26	11	9	109	31	15	27	21	17	39	41	19	15	11	49	41	23	33	41	27	88	5	61	4	66	2	13	15	1	20	67	17	16
TP379352	TGCAGTTGCTAGTCTCTTTCATATTGAAAGTGTGCCTTTTCAGGGGGACGACCTCTTTCTGGAC	TGCAGTTGCTAGTCTCGTTCATATTGAAAGTGTGCCTTTTCAGGGGGACGACCTCTTTCTGGAC	38	0	52	0	45	0	73	0	34	0	82	0	24	0	28	0	95	0	30	0	46	0	39	0	46	0	32	0	54	0	24	0	41	0	40	27	28	9	31	10	48	0	NA	NA	55	0	NA
TP379372	TGCAGTTGCTCAAACGGTTTGGTATACTGAAAATGGGGGGAGGGGGTAATTAGTAGGGGATGGA	TGCAGTTGCTCAAACGGTTTGGTATACTGAAAATGGGGGGAGGGGGTAATTAGTAGGAGATGGA	NA	NA	88	0	43	0	136	0	76	18	93	0	NA	NA	42	0	88	0	103	0	91	33	48	0	22	0	41	17	67	0	41	13	68	9	60	11	34	40	14	45	55	10	17	7	61	0	33
TP379940	TGCAGTTGGACGGCACGCTCCAAGTCGGCCAGCGCGGCGGGAAAATTGCGACAGCCGAAAAAAA	TGCAGTTGGACGGCACGCTCCAAGTCGGCAAGCGCGGCGGGAAAATTGCGACAGCCGAAAAAAA	28	30	9	48	36	54	57	94	35	73	33	47	30	20	20	22	99	121	30	57	56	80	30	49	29	59	40	37	44	59	51	66	34	47	24	45	5	21	7	24	32	59	37	40	25	41	15
TP380020	TGCAGTTGGAGTTGTCGGAGTATCGAAAATCTTTGCATGCTGAATACGCACCGAAGGCAAGTTC	TGCAGTTGGAGTTGTCGGAGTATCGAAAATCTTTGCATGCTGAATACGCACAGAAGGCAAGTTC	0	63	7	85	0	68	28	43	2	59	0	62	NA	NA	0	52	0	132	0	38	102	63	0	64	2	39	34	9	23	36	7	58	7	25	50	33	79	8	108	0	27	21	0	23	0	27	0
TP380054	TGCAGTTGGATTTCGTCCACGCTGCCATCCTTGTGCTGAAAATATTAAAGTTATCCCGAAATAA	TGCAGTTGGATTTCGTCCACGCTGCCATCCTTGTGCTGAAAATATTAAAGTTATACCGAAATAA	2	23	48	15	66	11	31	41	47	6	38	4	NA	NA	23	13	95	2	16	36	32	29	28	11	39	1	19	6	47	31	33	9	35	9	80	0	52	0	45	0	37	5	46	11	60	3	28
TP380077	TGCAGTTGGCAATTTGCCCCGTTTTGCCATTGCGGCCTCAACCAAATCACAAACACAAAGCGTT	TGCAGTTGGCAATTCGCCCCGTTTTGCCATTGCGGCCTCAACCAAATCACAAACACAAAGCGTT	30	9	59	78	18	64	12	94	24	36	24	12	18	22	17	28	104	0	29	67	21	68	26	11	NA	NA	15	68	0	80	4	37	48	58	9	82	8	54	0	60	9	25	21	10	47	8	NA
TP380095	TGCAGTTGGCACACCTTCTCGTAGTAGGGTCGTTCCTCCTCCCCAAGTGCCTTCAGTTGTTGCA	TGCAGTTGGCACACCTTCTCGTAGTACGGTCGTTCCTCCTCCCCAAGTGCCTTCAGTTGTTGCA	103	0	58	0	92	0	39	47	107	0	102	0	39	0	42	0	138	0	44	0	105	0	88	0	80	0	23	8	65	14	72	0	59	0	48	0	NA	NA	NA	NA	92	0	38	0	90	0	40
TP380168	TGCAGTTGGCCATCATTCTGATCAGTGTATTGGCTGATCTGTTGATTGATCTATTTGAATTTGG	TGCAGTTGGCCATCATTCTGATCAGTGTATTGGCTGATCTGTTGATTGATCAATTTGAATTTGG	0	25	0	52	0	37	0	49	0	33	0	32	NA	NA	0	38	0	43	25	15	0	34	10	27	0	30	0	26	0	38	0	20	0	30	0	47	0	31	0	36	0	20	0	23	0	34	0
TP380188	TGCAGTTTGCCCCATTCAAAGTACGCGGCCGAGAAGCGGGGAGCATCGCCTGGAATTTTGAACA	TGCAGTTGGCCCCATTCAAAGTACGCGGCCGAGAAGCGGGGAGCATCGCCTGGAATTTTGAACA	24	34	0	38	0	41	2	39	2	89	0	92	0	23	4	64	0	103	NA	NA	0	83	0	88	0	64	0	31	0	43	0	86	20	28	0	26	34	26	31	0	0	43	5	67	0	70	0
TP380233	TGCAGTTGGCCTGCGGCGGCGAGGCGGTCAATTCGGTGGACGACCTGACGCCCGATGTGCTCGG	TGCAGTTGGCCTGCGGCGGCGAGGCGGTCAATTCGGTGGACGACCTGACGCCCGATGTGCTCGC	55	2	21	0	89	1	84	1	76	0	38	2	26	0	29	0	203	0	25	0	78	2	90	0	50	0	NA	NA	71	0	96	0	71	1	105	1	57	1	77	0	73	0	44	0	65	0	57
TP380295	TGCAGTTGGCGCGACCGTCCACCATCACTGCCGCCAGCGCAACGGATGCGACGAGCACCAGCGA	TGCAGTTGGCGCGACCGTCCACCATCACTGCCGCCAGCGCAACGGACGCGACGAGCACCAGCGA	0	47	0	97	0	71	1	52	1	41	0	60	0	39	0	42	0	172	0	104	28	59	0	52	15	45	4	26	29	60	0	73	0	58	18	43	1	56	5	82	0	75	0	46	0	77	0
TP380386	TGCAGTTGGCTTGTTGCTCCGCTTCTGTCCACTTGGCCATTGTCTGATGCTGTTGCCGCTGGGC	TGCAGTTGGCTTGTTGCTCCGCTTCTGTCCACTTGGCCATTGTCTGATGCTGTTGCCGATGGGC	211	0	260	0	335	0	385	0	240	5	224	0	86	4	142	0	420	0	143	31	357	1	280	0	195	0	124	0	229	0	172	0	194	0	273	21	140	8	122	14	126	0	147	0	372	0	98
TP380396	TGCAGTTGGGAACTGCTTAAGTGACTCAATGCCATGCCGTGCTGTCCGTACAATTACCATCACA	TGCAGTTGGGAACTGCTTAAGTGACTCAATGCCATGCCGTGCTGTCCGTACAATTACCATCAAA	37	10	125	40	35	59	85	54	41	81	58	33	15	34	20	35	52	111	NA	NA	42	57	65	57	67	8	37	62	79	38	2	98	58	39	42	65	0	102	25	94	57	14	11	31	68	31	8
TP380593	TGCAGTTGTTCAGCGTTGGACACGCCTTTCAGCTCTGCGATGAACGCATTAATTTCCCGTAAAA	TGCAGTTGGTCAGCGTTGGACACGCCTTTCAGCTCTGCGATGAACGCATTAATTTCCCGTAAAA	0	51	0	38	6	73	0	160	1	93	13	51	11	43	8	17	4	129	12	59	5	85	0	67	0	52	2	49	0	84	18	38	0	87	6	117	0	57	0	71	0	41	0	24	0	50	3
TP380640	TGCAGTTGGTCGCCGCCAACACCGTCCCCAACATTTGCCTGCTGCTGTTGTTGTTGCTGGTGGT	TGCAGTTGGTCGCCGCCAACACCGTCCCCAACATTTGCCTGCTGCTGTTGTTGCTGCTGGTGGT	NA	NA	68	0	42	14	63	6	40	4	66	18	18	2	54	20	66	6	97	35	23	0	36	0	NA	NA	50	1	70	1	63	7	71	7	63	0	79	7	65	0	51	0	0	0	34	3	28
TP380716	TGCAGTTGGTGCTGTTTTGTGCCCAACTTTTTGCTGTTTTTTTCCGTCTGCCGCCATTTTGAGT	TGCAGTTGGTGCTGTTTTGTGCCCAACTTTTTGATGTTTTTTTCCGTCTGCCGCCATTTTGAGT	67	25	191	3	126	23	210	0	157	0	93	45	101	3	57	1	296	0	125	4	163	5	108	30	106	15	119	4	192	0	78	37	165	0	228	6	121	0	103	0	65	0	71	7	169	1	111
TP380805	TGCAGTTGTACAAATGCGCTGCCGATCAAAGGAAATCGCTCCAAAAATGGGCCAAAAGTGCGCC	TGCAGTTGTACAAATGCGCTGCCGATCAAAGGAAATCGCTCCAAAAATGGGCCAAAAGTGCGCA	NA	NA	9	13	14	16	37	30	18	18	18	25	13	13	NA	NA	33	29	14	26	19	18	28	39	15	13	13	16	10	15	16	23	12	19	17	30	18	16	10	22	NA	NA	NA	NA	16	29	NA
TP380818	TGCAGTTGTATCCGTCCTCCGTGTCCTCACAGTGCGCGTTTTTGTCGCATTTGTTCACTTTTGG	TGCAGTTGTACCCGTCCTCCGTGTCCTCACAGTGCGCGTTTTTGTCGCATTTGTTCACTTTTGG	15	10	33	30	47	0	34	10	24	1	17	4	NA	NA	NA	NA	4	46	18	13	32	12	23	6	12	9	NA	NA	30	13	13	35	15	8	31	22	NA	NA	NA	NA	18	10	15	6	10	33	10
TP380912	TGCAGTTGTATCTTCCGTTGCTCTTTTTCTCTCTGCGCTGCCTCTTTCTGTTCTCTCTCTTTAG	TGCAGTTGTATCTTCCGTTGCTCTTTTTCTCTCTGCGCTGCCTCTTTCTGTTCTCTCTCTTTAA	69	5	73	3	77	39	29	51	98	29	90	0	16	19	57	2	134	15	17	48	83	28	75	0	74	39	59	60	63	58	58	22	7	48	81	108	0	97	8	69	41	11	77	8	123	1	41
TP380982	TGCAGTTGTCCAGAAGCATCTGAAGGAGAAAGCTTCCCCCTTGGCGTTGGAATTTGCTGGGAAT	TGCAGTTGTCCAGAAGCATCTGAAGGAGAAAGCTTCCCCCTTGGCGTTGGAATTCGCTGGGAAT	37	150	36	31	138	92	49	255	39	130	60	74	60	60	73	89	1	86	0	203	162	173	123	163	25	75	23	78	54	169	59	147	50	119	35	204	31	135	0	203	29	59	3	29	93	154	7
TP381168	TGCAGTTGTGAGCCTCTCCAAAAGAATCTGAAATTTAAGGTGTTTTTGTTGTAAAGTGTAAAAT	TGCAGTTGTGAGCCTCTCCAAAAGAATCTGAAATTTAAGGTGTTTTTGTTGTAAAGTGTAAAAA	2	40	1	39	1	78	0	62	1	71	0	67	1	39	NA	NA	1	186	NA	NA	2	87	3	87	0	30	0	32	1	57	2	54	0	48	1	57	1	26	0	25	2	63	0	34	0	108	0
TP381210	TGCAGTTGTGCCGTGGTCTGTTCCCGCTGTACTACCCGCACCTGGAACGCGACACGGAGTGGAC	TGCAGTTGTGCCGTGGTCTGTTCCCGCTGTACTACCCGCACATGGAACGCGACACGGAGTGGAC	0	85	0	144	5	138	0	125	0	79	0	84	0	74	0	80	0	231	0	112	0	178	0	172	0	81	2	95	0	206	0	122	0	94	30	145	17	108	14	99	0	91	0	82	0	157	0
TP381222	TGCAGTTGTGCGCCCATTGAGCTGGTTGATTTCTCAGAAACGACACTCGCGCGCGGCCCGCCAA	TGCAGTTGTGCGCCCATTGAGCTGGTCGATTTCTCAGAAACGACACTCGCGCGCGGCCCGCCAA	0	85	0	77	0	83	27	77	8	95	0	85	1	35	0	52	0	161	0	86	27	115	0	78	0	81	3	81	43	68	0	58	0	67	0	107	0	84	0	103	0	76	1	69	0	82	2
TP381253	TGCAGTTGTGGCCTAGCAACTAGCTCATTTACCACGGGAACAAACAGTAGCGGAGCAGAGAGCA	TGCAGTTGTGGCCTAGCAACTAGCTCATTTACCACGGGAACAAACAGAAGCGGAGCAGAGAGCA	23	3	61	4	75	4	90	27	67	5	36	13	51	0	28	0	164	0	20	10	50	6	90	0	37	0	23	2	41	22	42	0	58	0	34	4	33	0	67	1	38	0	29	2	57	0	26
TP381270	TGCAGTTGTGGTACTTCCGACGCATTTATTAAACCCTCACGCACAAGAAATTGGCTAAAGTCCC	TGCAGTTGTGGTACTTCCGACGCATTAATTAAACCCTCACGCACAAGAAATTGGCTAAAGTCCC	0	30	0	69	0	33	0	88	0	37	0	48	0	37	0	29	0	80	0	21	0	52	0	35	0	21	0	27	0	43	0	51	0	29	0	30	0	32	0	33	0	35	0	27	0	55	0
TP381318	TGCAGTTGTTATTACTGTTGCGACAAACAGTACGCCAAATACTGTCCACAAGGGTGCCTCAATT	TGCAGTTGTTACTACTGTTGCGACAAACAGTACGCCAAATACTGTCCACAAGGGTGCCTCAATT	26	6	58	0	66	10	103	0	55	0	32	3	34	4	NA	NA	88	27	112	0	94	0	71	0	38	3	NA	NA	51	0	65	17	45	0	27	0	30	0	31	0	45	1	NA	NA	66	3	68
TP381338	TGCAGTTGTTCAACTCTCTTGGTTGAATTCTTGAAATGACTCGTCAGTTTGAAGACAATGGACT	TGCAGTTGTTCAACTCTCTTGGTTGAATTCTAGAAATGACTCGTCAGTTTGAAGACAATGGACT	31	0	52	0	32	3	76	3	22	0	NA	NA	NA	NA	31	0	85	0	36	0	80	0	47	0	44	0	NA	NA	47	17	47	0	28	4	27	22	17	16	NA	NA	NA	NA	30	0	30	0	23
TP381482	TGCAGTTGTTCTACCGCGACACGGAGCAGGCCGAGTCGTGGTTGACCAAACAGGAGGCAGGTTA	TGCAGTTGTTCTACCGCGACACGGAGCAGGCCGAGTCGTGGATGACCAAACAGGAGGCAGGTTA	NA	NA	0	21	1	35	5	76	2	65	18	54	5	43	0	34	0	178	17	100	0	129	0	84	1	30	0	52	10	79	0	40	0	91	NA	NA	NA	NA	0	0	0	27	NA	NA	0	75	0
TP381589	TGCAGTTGTTGTGGCGGCACGACCCAGCTGATGGGCACCTTTTCACTGCCACAGTCGAGATTGT	TGCAGTTGTTGTCGCGGCACGACCCAGCTGATGGGCACCTTTTCACTGCCACAGTCGAGATTGT	0	166	39	453	0	294	0	330	0	232	2	245	23	162	0	137	10	411	0	456	0	128	3	257	0	225	59	154	0	196	0	258	0	176	0	346	0	375	0	466	0	245	0	123	0	330	0
TP381617	TGCAGTTGTTGTTGCTGTTGCGTGTTCATGCATGCCGACGCCTCCGCGGCGTTCATCTGCTGCT	TGCAGTTGTTGTTGCTGTTGCGTGTTCATGCATGCCGACGCCGCCGCGGCGTTCATCTGCTGCT	4	112	0	142	3	143	9	239	3	137	2	148	2	50	2	87	8	331	0	128	5	211	3	158	1	148	3	82	3	151	6	111	1	115	4	175	0	83	NA	NA	2	97	2	79	2	225	0
TP381760	TGCAGTTTACACATGCACGACAGCAGGATGGTCCAGCAGACAGCAGCAGACGCGGCAGAACAGT	TGCAGTTTACACATGCACGACAGCAGGACGGTCCAGCAGACAGCAGCAGACGCGGCAGAACAGT	0	43	0	53	0	44	11	49	0	34	0	24	NA	NA	0	26	0	127	0	57	0	81	0	27	0	48	0	35	18	49	0	33	0	28	0	62	0	30	0	30	0	47	0	25	0	37	NA
TP381954	TGCAGTTTATCCGACCTTACATTAAACAATTTGTCCGACTATAAAAGGCCGTACGCCATAAAAT	TGCAGTTTATCCGACCTTACATTAAACAATTTGTCCGACTATAAAAGGCCGTACGCCATAAAAA	29	3	77	15	43	3	95	6	21	0	32	6	NA	NA	34	3	118	6	54	3	86	3	52	2	50	7	25	1	77	3	NA	NA	38	9	74	0	36	2	44	4	50	2	25	3	73	9	37
TP381978	TGCAGTTTATGGACACCCACCACAACAACAAACTCAGAAGGTGCGCGCAGAATACAATACCACA	TGCAGTTTATGGACACCCACCACAACAACAAACTCAGAAGGTGCGCGCAAAATACAATACCACA	4	66	45	28	11	75	46	54	11	50	0	71	6	41	0	28	5	175	55	3	53	53	2	44	1	58	21	18	34	78	5	48	33	28	71	44	48	4	59	0	17	57	13	26	4	60	14
TP381987	TGCAGTTTATGTACCTGGGGCTGATGGTGAAGTACCTAATGCCACGATTGTGGTAAGAGAACGT	TGCAGTTTATGTACCTGGGGCTGATGGTGAAGTACCTAATGCCAAGATTGTGGTAAGAGAACGT	0	174	0	133	0	133	0	241	34	140	4	218	0	56	0	87	0	417	0	101	20	321	16	156	7	151	0	118	0	185	0	136	0	206	0	188	0	84	0	54	0	112	0	94	0	162	0
TP382019	TGCAGTTTATTTGCTGTTTCGTTATGATTTTCAGTTTTAGGCGATATGACTTTCCAAGCGTTGA	TGCAGTTTATTTGCTGTTTCGTTATGATTTTCACTTTTAGGCGATATGACTTTCCAAGCGTTGA	21	43	75	19	50	33	87	44	48	13	38	35	28	3	9	17	53	68	44	2	78	0	24	50	30	14	33	7	48	31	82	0	75	8	64	14	55	6	52	0	47	1	13	17	67	39	18
TP382652	TGCAGTTTCTATCGGAACTTTAATTTTCATTTTCACCACGGTACTCAAATATGCGCTGATATTT	TGCAGTTTCTATCGGAACTTTAATTTTCATTTTCACCACGGTACTCAAATATGCGCTAATATTT	2	474	0	714	1	602	107	763	8	442	2	315	2	248	0	322	0	302	0	704	171	409	0	304	12	400	44	200	93	444	9	401	1	31	112	246	90	33	83	0	4	288	0	216	3	854	0
TP382886	TGCAGTTTCTTGGTCCATCATCTCCAGCAGGTGTGCTCCCTTACGGGAACCTTTTCTGGACGGC	TGCAGTTTCTTGGTCCATCATCTCCAGCAGATGTGCTCCCTTACGGGAACCTTTTCTGGACGGC	25	0	NA	NA	19	8	22	38	8	13	8	18	NA	NA	2	25	34	34	0	26	11	40	25	6	NA	NA	17	9	4	23	4	21	12	16	21	41	1	29	2	38	8	12	NA	NA	9	25	NA
TP383149	TGCAGTTTGCCGATACAAAGTTGGGTTTGACAACCCAAATTGGCCAAGTTCGTGCTTAGCTCGG	TGCAGTTTGCCGATACAAAGTTGGATTTGACAACCCAAATTGGCCAAGTTCGTGCTTAGCTCGG	0	27	28	12	NA	NA	8	28	30	32	15	25	NA	NA	25	21	63	28	18	5	14	33	3	35	NA	NA	NA	NA	4	30	17	3	NA	NA	9	18	9	19	2	28	10	12	NA	NA	6	21	7
TP383591	TGCAGTTTGTGCATTTTCTCCTGTCTAAATGAGCGAAGCGCCAATGCCACCGTATTGTCGGGAC	TGCAGTTTGTGCATTTTCTCCTGTCTAAATGAGCGAAGCGCCAATGCCACCGTATTGTCGGAAC	87	0	51	0	99	0	107	0	80	15	31	10	39	0	39	2	91	25	55	0	113	4	81	8	44	3	52	6	100	0	70	0	92	0	93	16	104	0	53	0	25	0	48	17	64	0	16
TP383680	TGCAGTTTTACCCATTCCCGATTTCGCCTGACAGACAATGTCCATTCCAAGAATAGCTTGTGGA	TGCAGTTTTACCCATTCCCGATTTCGCCTGACAGACAATGTCCATTCCAAGAATAGCTTGTGAA	60	0	61	0	52	1	101	1	48	0	42	0	34	0	50	0	174	1	77	1	90	1	60	0	46	0	41	1	63	0	53	0	64	1	88	0	108	0	63	2	54	0	57	0	80	0	24
TP383700	TGCAGTTTTAGCAGAATGGGCATTTTAACTGCTTCGAAAGTGTGCACTTTGCCACGGCTTTCTT	TGCAGTTTTAGCAGAATGGGCATTTTAACTGCTTCGAAAGTATGCACTTTGCCACGGCTTTCTT	2	19	2	62	0	41	2	61	3	19	0	37	NA	NA	NA	NA	0	56	0	29	0	26	2	38	0	26	NA	NA	0	51	0	27	12	27	10	33	14	22	25	11	5	21	3	23	0	47	NA
TP383732	TGCAGTTTTATTCGTCGGCTTCTTCCTCCCCTTCTCGGATTCGTTGTCGCCTTCTAAACTTGTG	TGCAGTTTTATTCGTCGGCTTCTTCCTCCCCTTCTCGGATTCGTTGTCGCCTTCTAAACTCGTG	0	23	0	38	3	23	1	24	NA	NA	8	22	0	23	NA	NA	0	39	4	25	0	25	0	39	0	33	0	27	0	32	0	25	0	21	2	31	0	20	0	33	0	30	NA	NA	0	24	NA
TP383812	TGCAGTTTTCGAAGCTCTTTTCGGCGATGTTTTGTCTCCAGATAGACTTTGTAGTAGAGGATAA	TGCAGTTTTCGAAGCTCTTTTCGGCGAAGTTTTGTCTCCAGATAGACTTTGTAGTAGAGGATAA	35	0	37	0	30	0	26	0	42	0	30	0	NA	NA	NA	NA	61	0	25	0	41	3	27	0	33	0	18	8	56	0	27	0	25	0	32	0	NA	NA	23	0	22	0	22	0	30	0	NA
TP384098	TGCAGTTTTTAACCCCAAGGTTTTTGGAAGGTCAGCCAACCTATTCTGACTAAGCATCCAAAAT	TGCAGTTTTTAACCCCAAGGTTTTTGGAAGGTCAGCCAACCTATTCTGACTAAGCATCCAAAAA	NA	NA	0	131	1	47	0	49	0	31	NA	NA	0	60	0	34	1	63	1	92	1	80	NA	NA	NA	NA	0	45	0	29	0	21	NA	NA	0	51	0	83	0	76	0	52	0	38	0	28	0
TP384185	TGCAGTTTTTCGCCATCGACAAAACCAATAGTCCCTAGGCGGGTGAGGTCTGCATATATTGCAG	TGCAGTTTTTCGCCATCAACAAAACCAATAGTCCCTAGGCGGGTGAGGTCTGCATATATTGCAG	39	228	132	433	105	418	142	376	106	333	71	295	83	193	64	255	137	939	98	304	70	434	62	520	128	382	66	209	151	286	25	154	89	388	41	425	28	243	20	200	37	311	72	204	89	417	63
TP384314	TGCAGTTTTTTCAATCAACTTTTAGGTGACCAATCATAATTTTCGCGATCAATCAAAAGCTTTT	TGCAGTTTTTTCAATCAACTTTTAGGTGACCAATCATAATTTTCGCGATCAATCAAAAGCTTTG	77	3	97	8	76	5	111	5	48	2	57	3	72	6	44	1	189	7	63	0	88	7	96	7	24	3	28	0	86	10	83	2	62	0	40	3	36	3	NA	NA	42	1	64	3	74	1	34
TP384323	TGCAGTTTTTTCAGAACTTTCATCCCCTGTCTTTAAACTATGAATTTTCGATGAATTATTTGTC	TGCAGTTTTTTCAGAACTTTCATCCCCTGTCTTTAAACTATGAATTTTCGATGAATTATTTATC	0	66	2	55	0	76	3	45	0	76	0	70	0	37	0	61	0	159	0	64	12	41	0	60	0	41	24	5	0	42	0	61	9	58	7	108	31	26	24	24	6	48	0	35	0	40	0
TP384371	TGCAGTTTTTTTTCGGTCGGTTCGCCATTTTCCATTTACTCACTGGTCATTTTCCACACATTTG	TGCAGTTTTTTTTCGGTCGGTTCGCCATTTTCCATTTACTCACTAGTCATTTTCCACACATTTG	10	16	1	41	0	20	11	29	2	37	0	35	NA	NA	NA	NA	0	73	0	40	13	31	NA	NA	NA	NA	11	29	10	21	NA	NA	21	13	37	15	31	3	28	0	10	17	NA	NA	0	31	NA
[truncated: 81 more columns]
